# Supplementary material for: Deep ocean temperatures through time
Source: Copernicus journal article supplement (doi:10.5194/cp-17-1483-2021), 2021-07-19

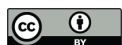

*Supplement of*

**Deep ocean temperatures through time**

**Paul J. Valdes et al.**

*Correspondence to:* Paul J. Valdes ([p.j.valdes@bristol.ac.uk](mailto:p.j.valdes@bristol.ac.uk))

The copyright of individual parts of the supplement might differ from the article licence.



# Scotese Climate Model Simulations Album

The following pages are a brief summary of the climates resulting from the 109 paleogeographies covering the whole of the Phanerozoic era. Access to many more climate variables is available via the website:

[https://www.paleo.bristol.ac.uk/ummodel/scripts/papers/Valdes et al 2021.html](https://www.paleo.bristol.ac.uk/ummodel/scripts/papers/Valdes_et_al_2021.html)

Each pages in the album corresponds to:

Top Left – Topography and Bathymetry on the resolution of the climate model (this and most subsequent plots use the area preserving Mollweide projection).

Top Right – Land ice mask, using a polar stereographic projection extending from 45N/45S to pole.

Subsequent part of page consists of two columns. The left column shows the results from the “smooth” CO<sub>2</sub> simulations and the right shows results from the Foster CO<sub>2</sub>.

The second row shows the time series of ocean volume integrated temperatures (solid line) and 2731m temperatures (dotted line) for the whole duration of the runs.

The third row shows the annual mean surface air temperature

The fourth row shows the annual mean precipitation

The first row shows the deep ocean temperature at 2731m and the bottom temperature (when depths are greater than 1000m)

The final row shows modelled mixed layer depth as a pair of plots corresponding to DJF/JJA. This allows for a clearer understanding of the regions where sinking is occurring (indicated by high mixed layer depths).

# Present-day (Holocene, 0 Ma)

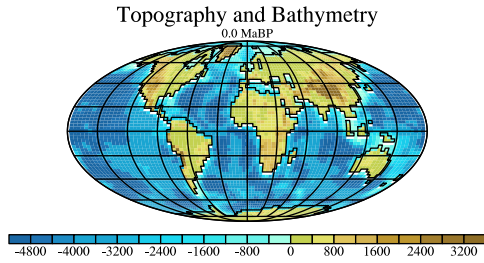

CO<sub>2</sub>= 280 ppmv

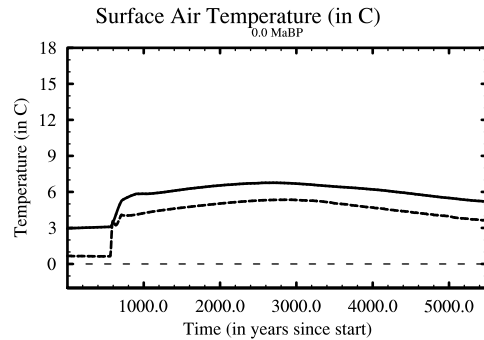

Surface Air Temperature (in C)  
Expt = texya 0.0 MaBP ANN

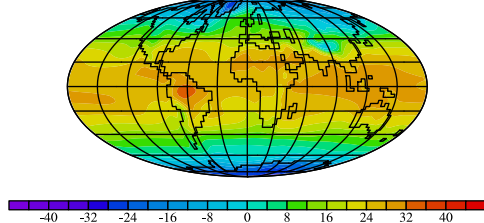

Precipitation (in mm/day)  
Expt = texya 0.0 MaBP ANN

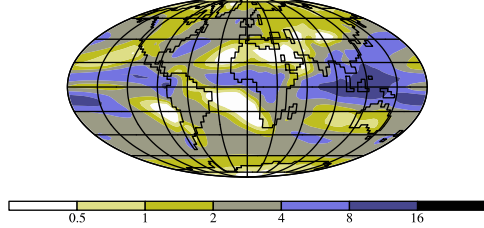

Potential Temperature (2731m, in C) Bottom Temperature (>1000m, in C)  
Expt = texya 0.0 MaBP ANN Expt = texya 000.0 MaBP ANN

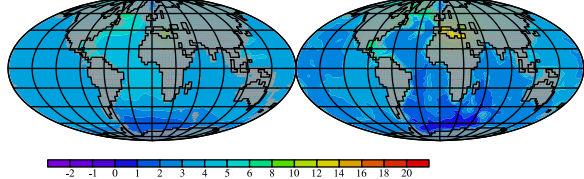

Mixed Layer depth (in m) Mixed Layer depth (in m)  
Expt = texya 0.0 MaBP DJF Expt = texya 0.0 MaBP JJA

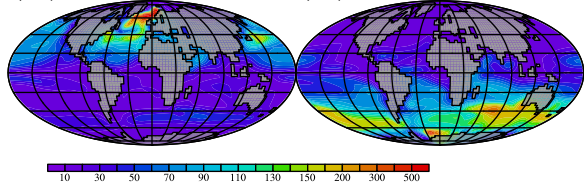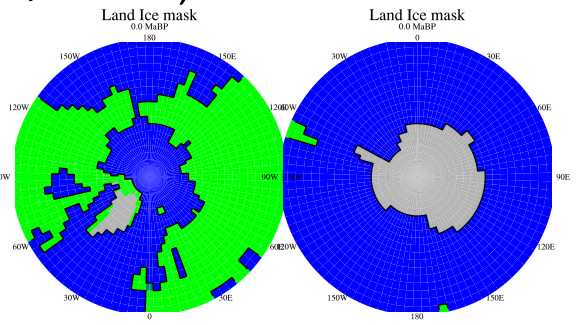

CO<sub>2</sub>= 276 ppmv

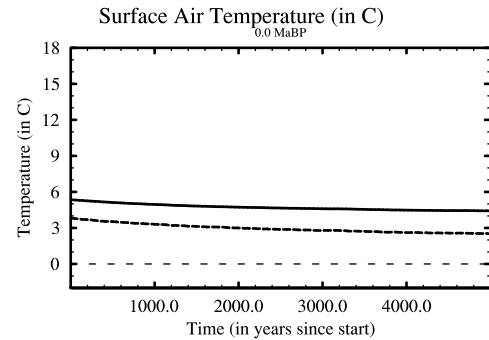

Surface Air Temperature (in C)  
Expt = texpa1 0.0 MaBP ANN

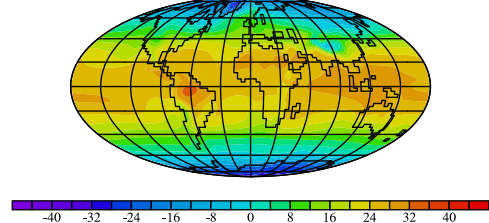

Precipitation (in mm/day)  
Expt = texpa1 0.0 MaBP ANN

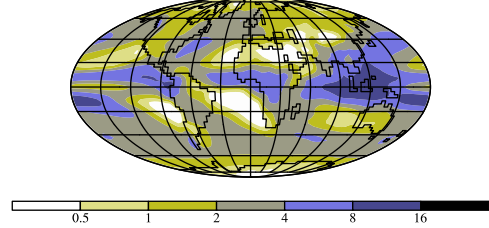

Potential Temperature (2731m, in C) Bottom Temperature (>1000m, in C)  
Expt = texpa1 0.0 MaBP ANN Expt = texpa1 000.0 MaBP ANN

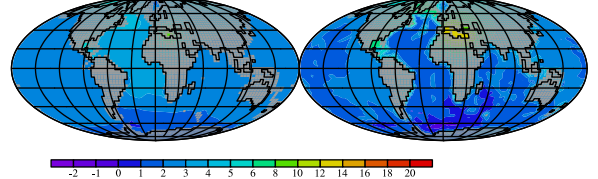

Mixed Layer depth (in m) Mixed Layer depth (in m)  
Expt = texpa1 0.0 MaBP DJF Expt = texpa1 0.0 MaBP JJA

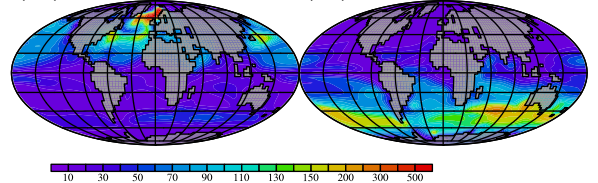

# Late Pliocene (Piacenzian, 3.09)

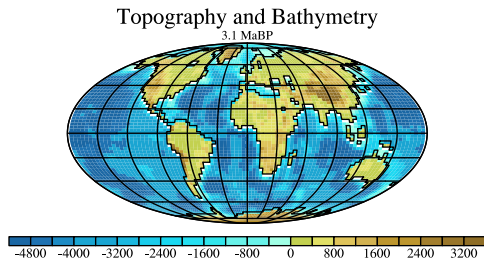

CO<sub>2</sub>= 384 ppmv

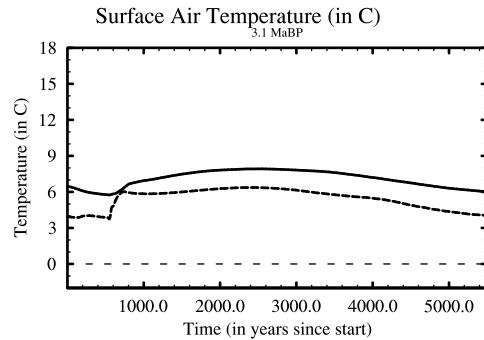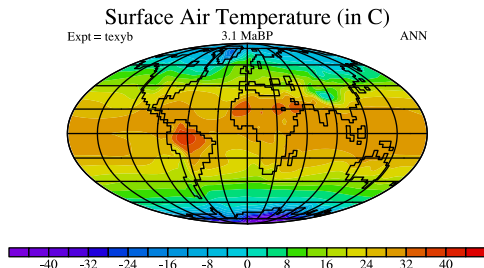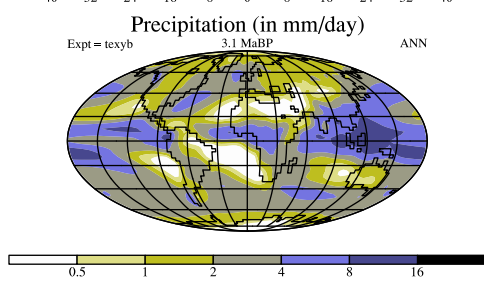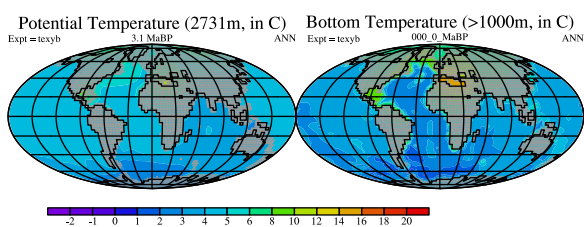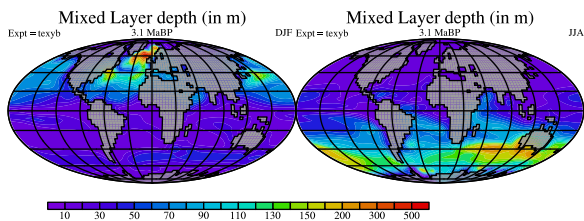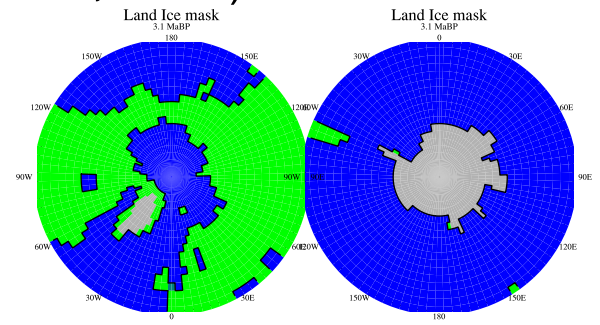

CO<sub>2</sub>= 298 ppmv

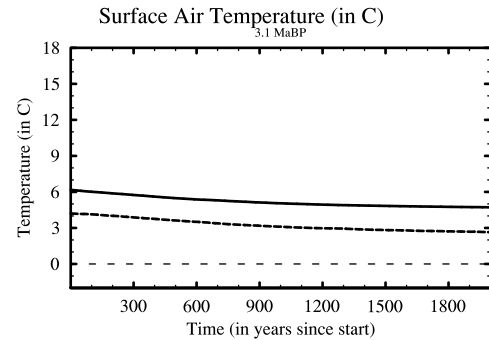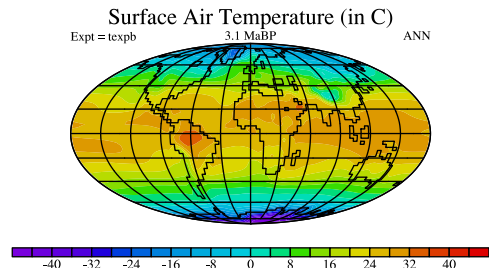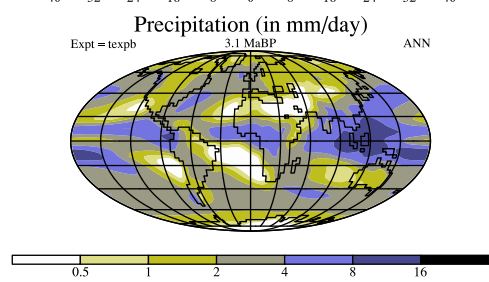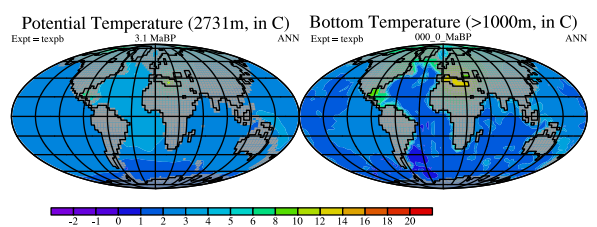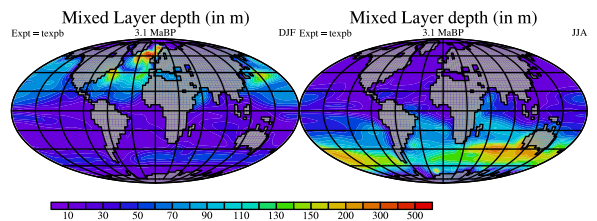

# Middle/Late Miocene (Serravallian&Tortonian, 10.5 Ma)

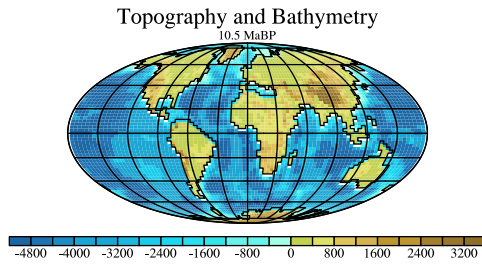

CO<sub>2</sub>= 410 ppmv

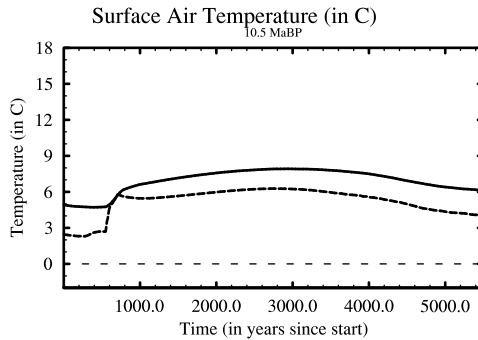

Surface Air Temperature (in C)  
10.5 MaBP

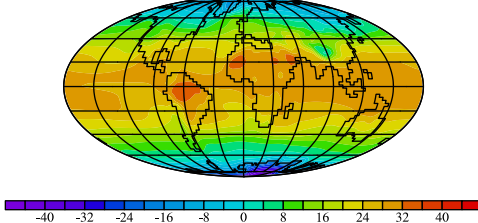

Precipitation (in mm/day)  
10.5 MaBP

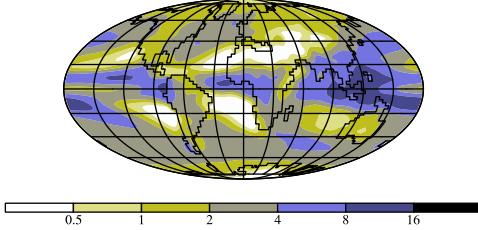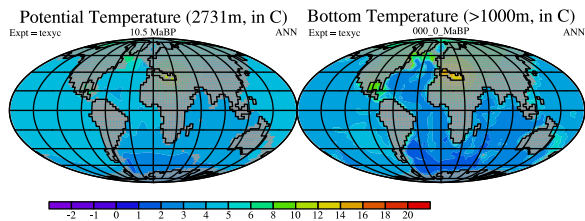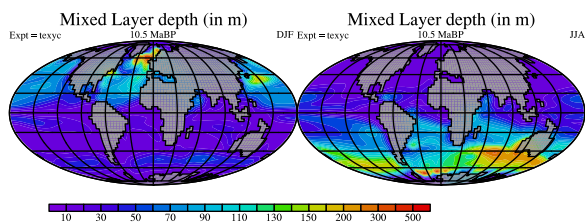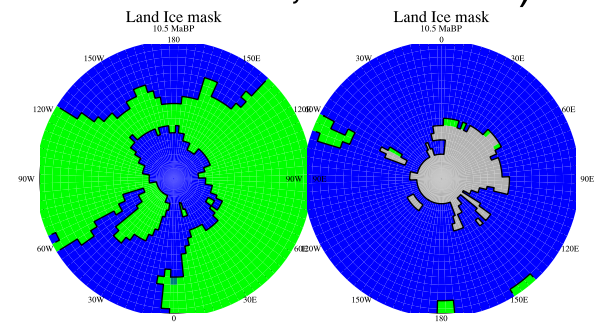

CO<sub>2</sub>= 299 ppmv

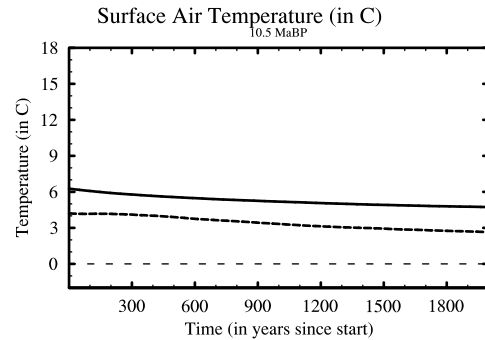

Surface Air Temperature (in C)  
10.5 MaBP

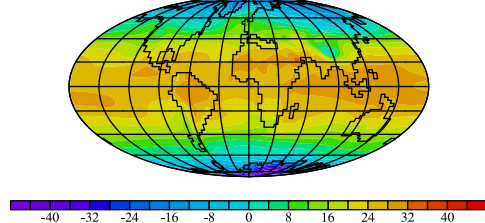

Precipitation (in mm/day)  
10.5 MaBP

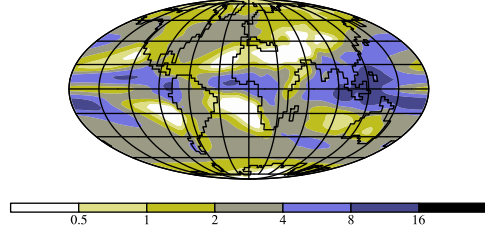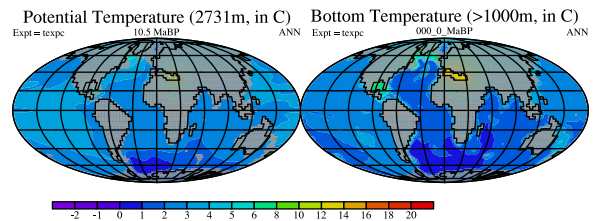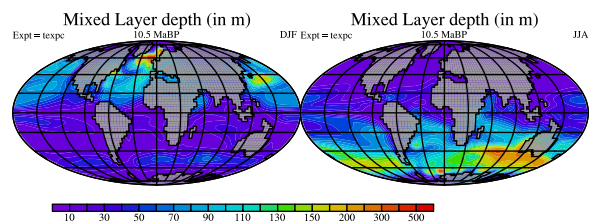



# Middle Miocene (Langhian, 14.9 Ma)

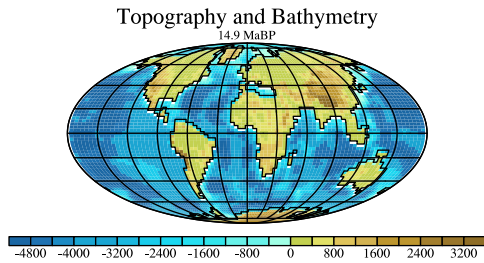

CO<sub>2</sub>= 423 ppmv

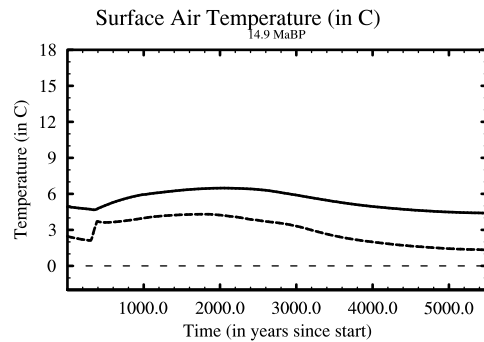

Surface Air Temperature (in C)  
14.9 MaBP

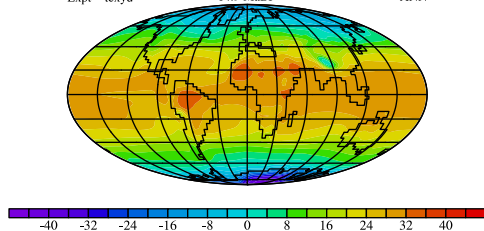

Precipitation (in mm/day)  
14.9 MaBP

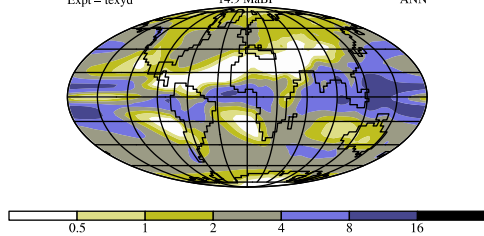

Potential Temperature (2731m, in C) Bottom Temperature (>1000m, in C)  
14.9 MaBP ANN Expt = texyd 000.0 MaBP ANN

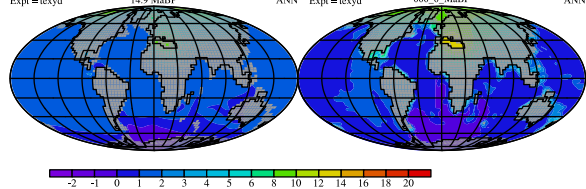

Mixed Layer depth (in m) Mixed Layer depth (in m)  
14.9 MaBP DJF Expt = texyd 14.9 MaBP JJA

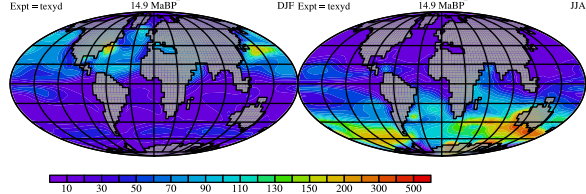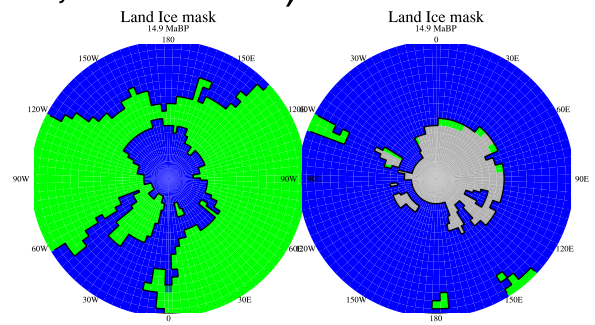

CO<sub>2</sub>= 310 ppmv

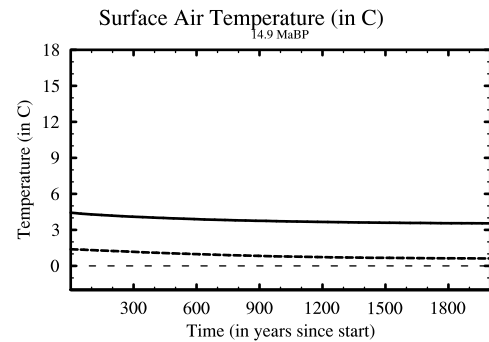

Surface Air Temperature (in C)  
14.9 MaBP

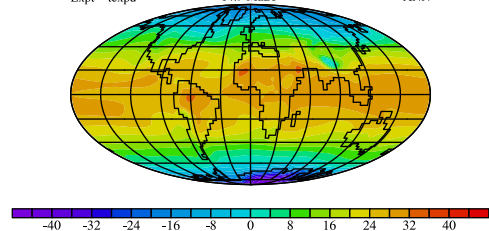

Precipitation (in mm/day)  
14.9 MaBP

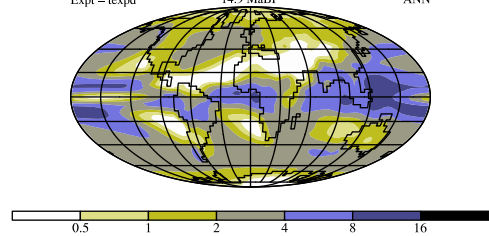

Potential Temperature (2731m, in C) Bottom Temperature (>1000m, in C)  
14.9 MaBP ANN Expt = texpd 000.0 MaBP ANN

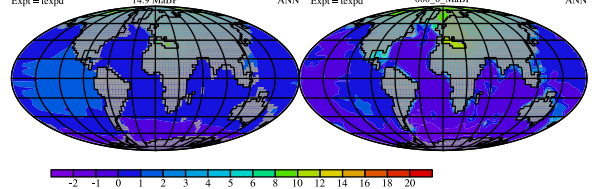

Mixed Layer depth (in m) Mixed Layer depth (in m)  
14.9 MaBP DJF Expt = texpd 14.9 MaBP JJA

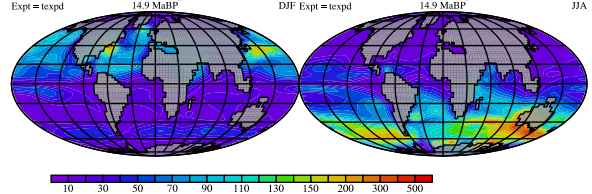

# Early Miocene (Aquitanian&Burdigalian, 19.5 Ma)

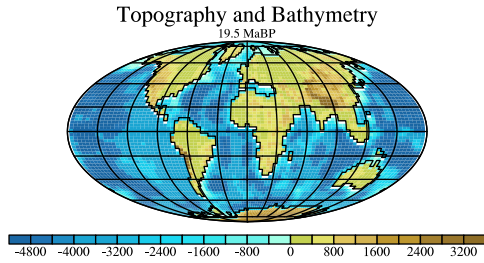

CO<sub>2</sub>= 430 ppmv

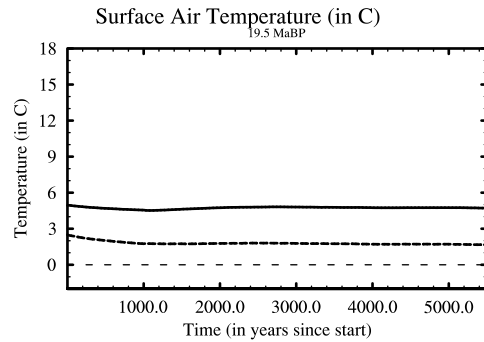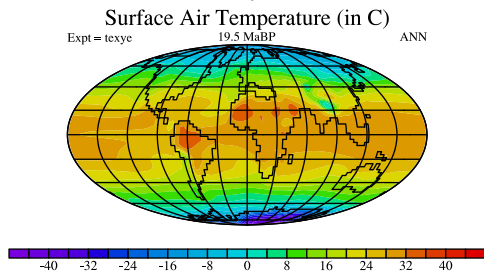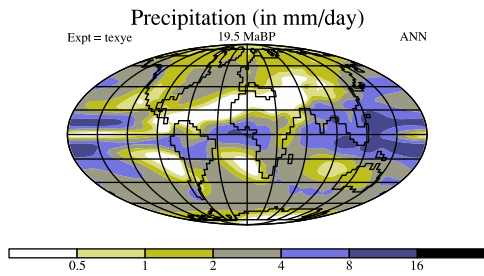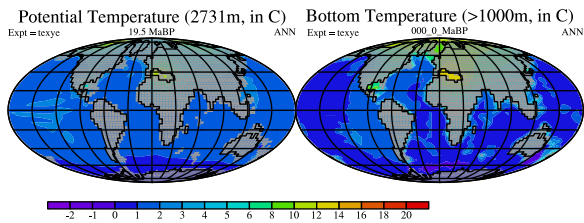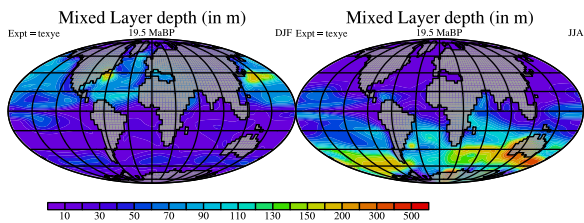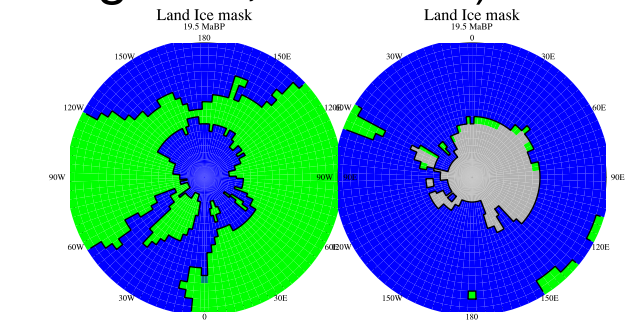

CO<sub>2</sub>= 338 ppmv

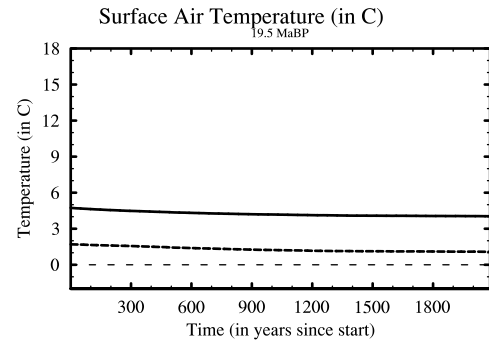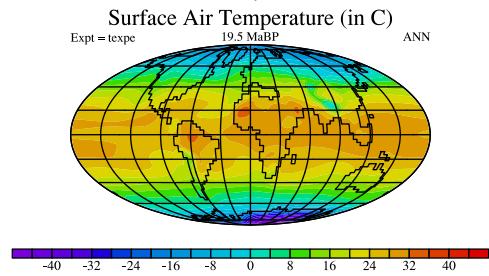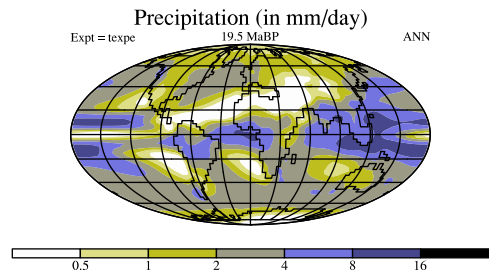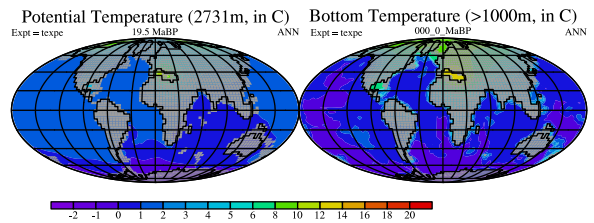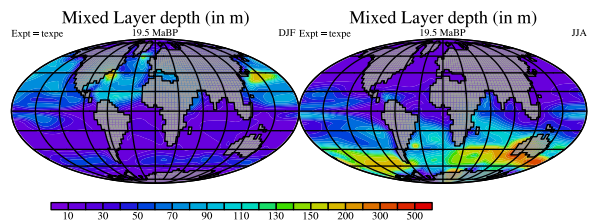

# Late Oligocene (Chattian, 25.6 Ma)

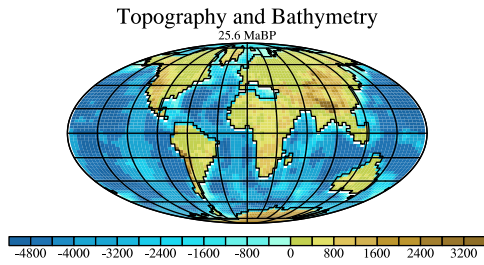

CO<sub>2</sub>= 439 ppmv

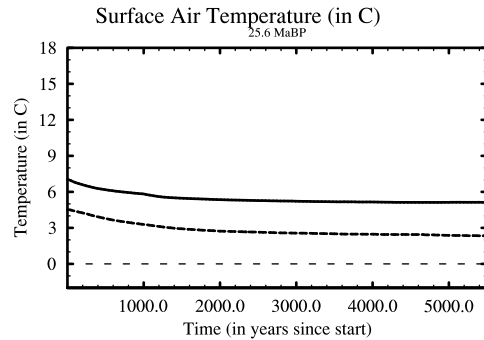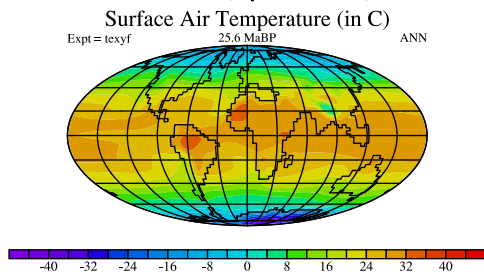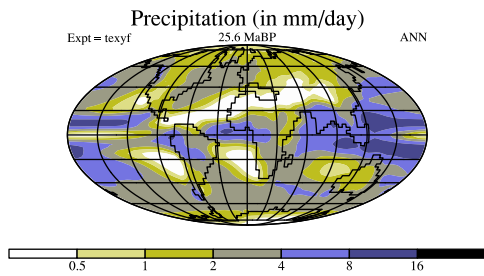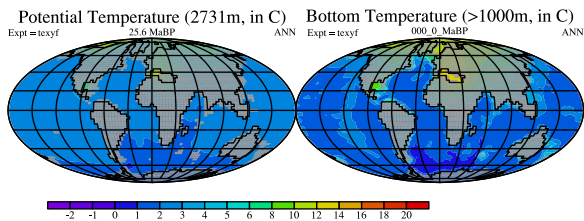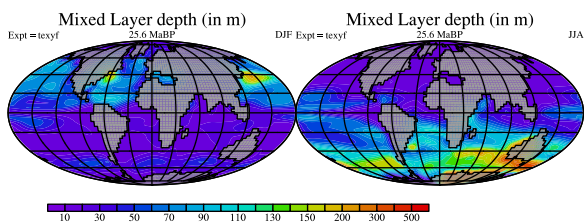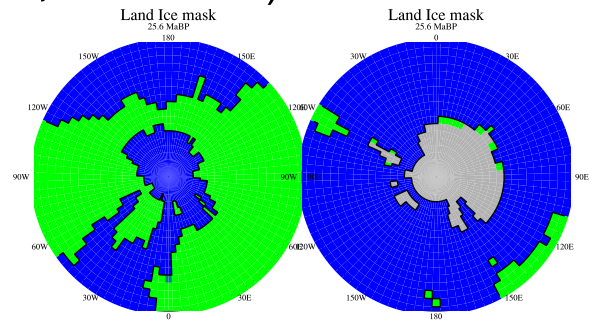

CO<sub>2</sub>= 502 ppmv

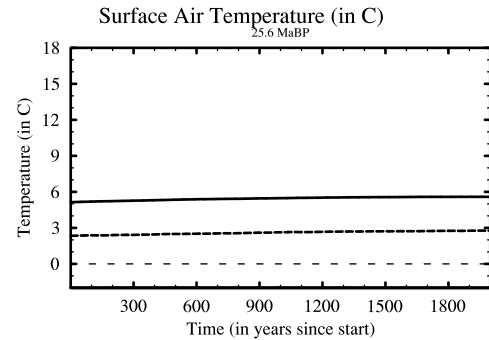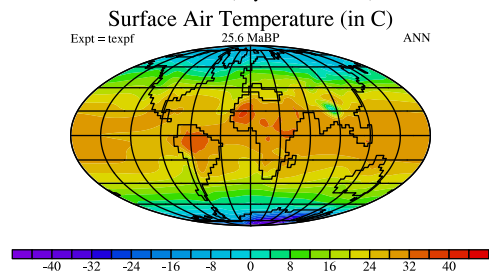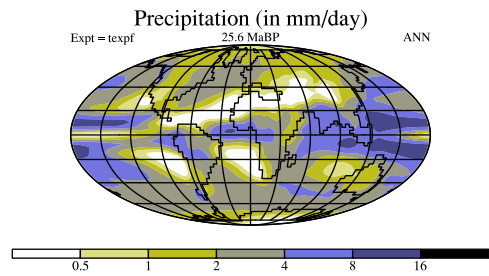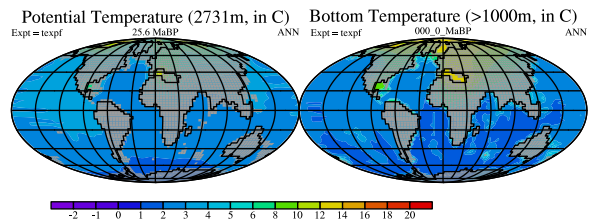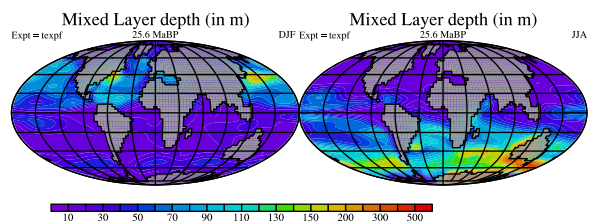



# Early Oligocene (Rupelian, 31 Ma)

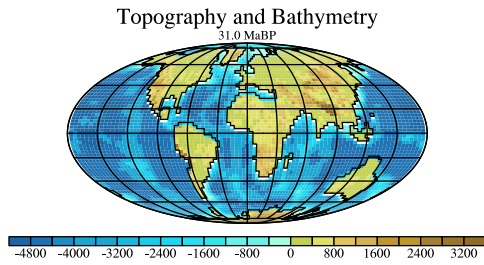

CO<sub>2</sub> = 500 ppmv

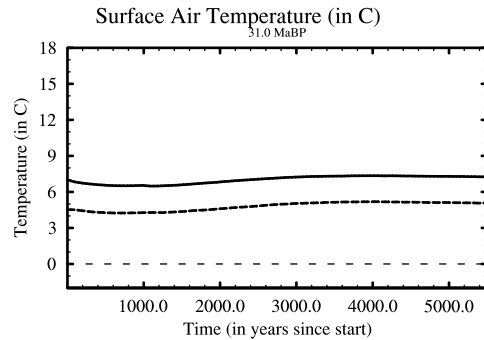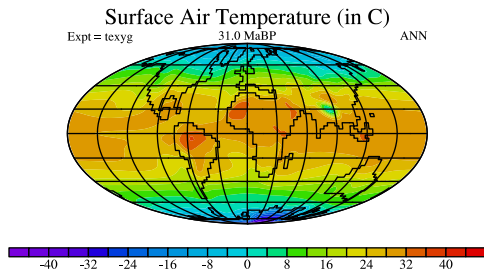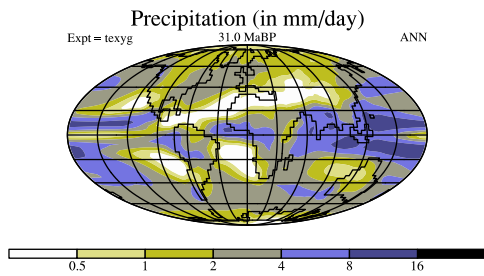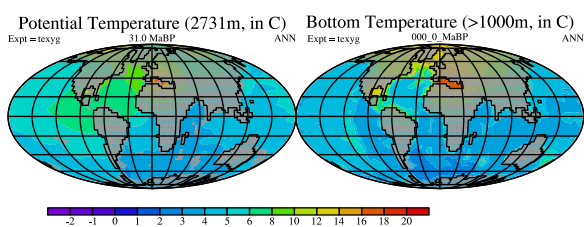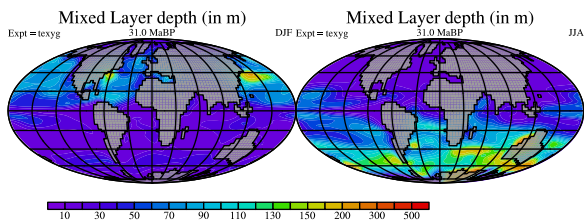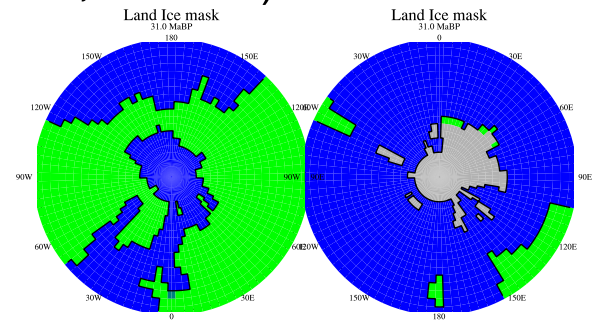

CO<sub>2</sub> = 764 ppmv

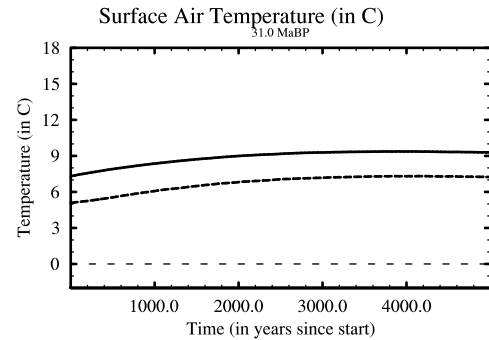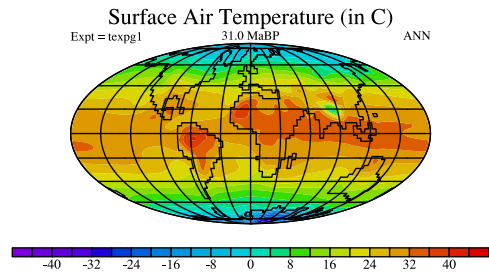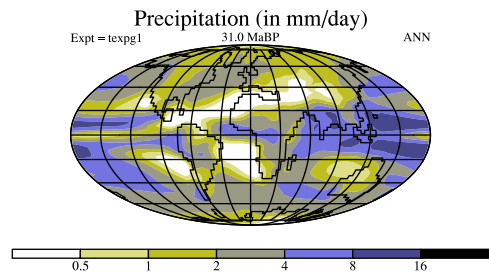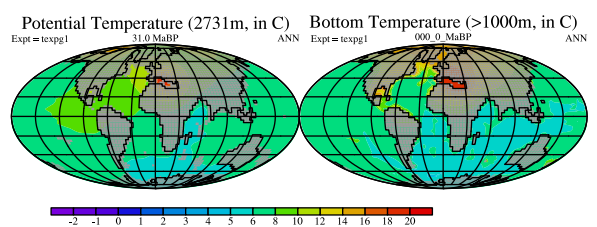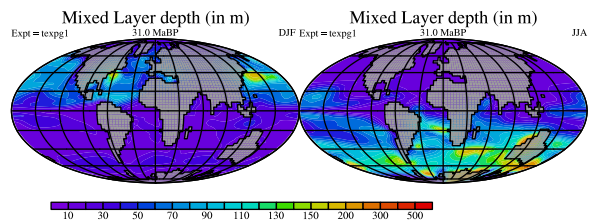



# Late Eocene (Priabonian, 35.9 Ma)

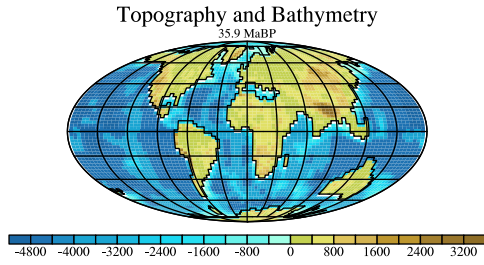

CO<sub>2</sub> = 533 ppmv

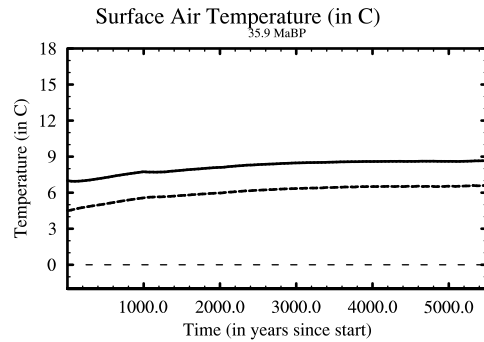

Surface Air Temperature (in C)  
Expt = texyh 35.9 MaBP ANN

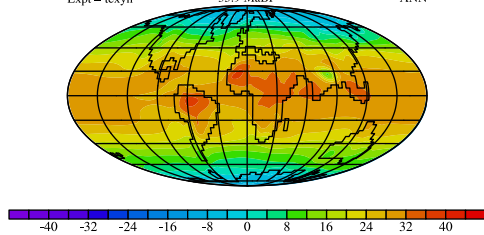

Precipitation (in mm/day)  
Expt = texyh 35.9 MaBP ANN

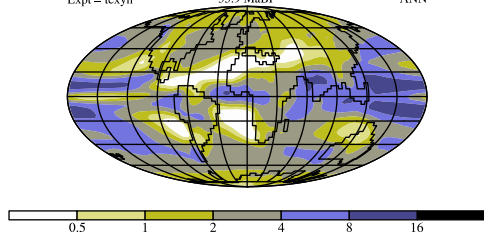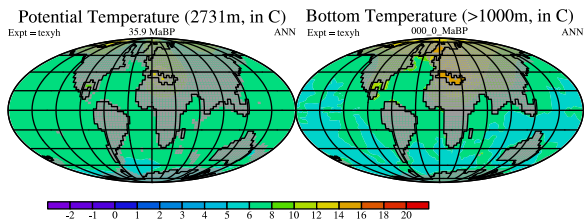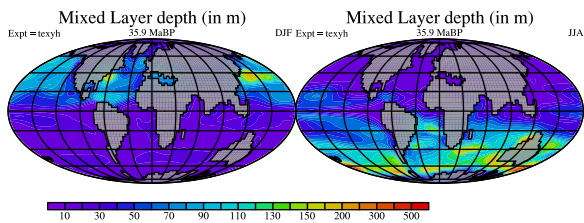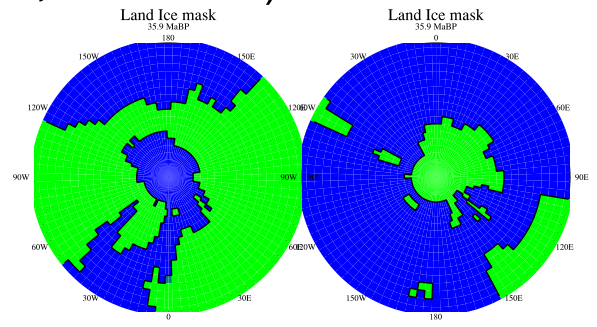

CO<sub>2</sub> = 901 ppmv

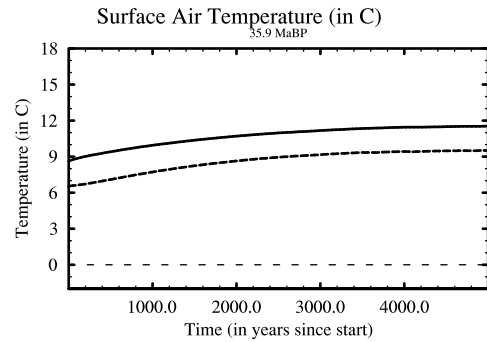

Surface Air Temperature (in C)  
Expt = texph1 35.9 MaBP ANN

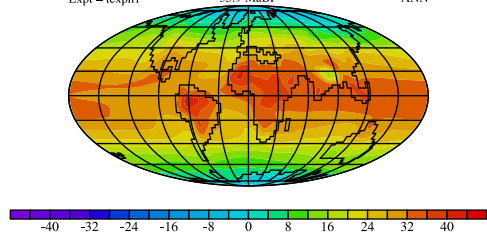

Precipitation (in mm/day)  
Expt = texph1 35.9 MaBP ANN

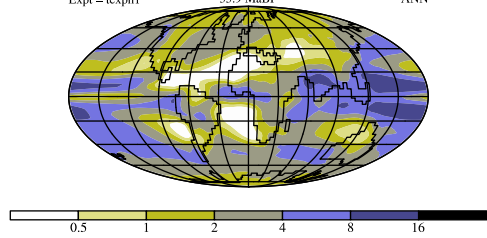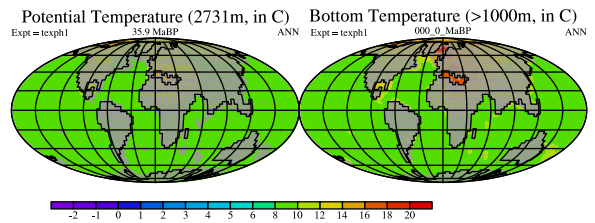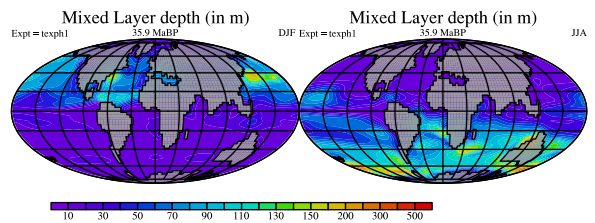

# late Middle Eocene (Bartonian, 39.5 Ma)

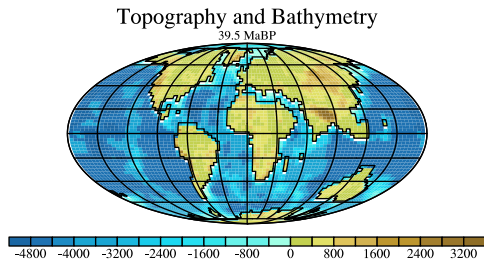

CO<sub>2</sub>= 557 ppmv

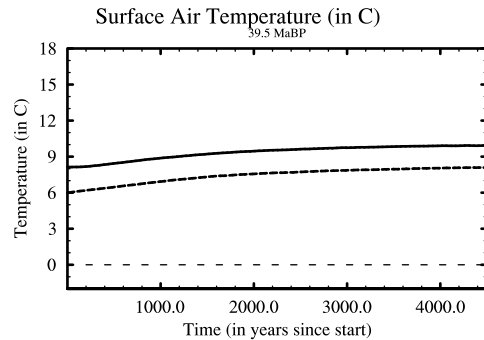

Surface Air Temperature (in C)  
39.5 MaBP

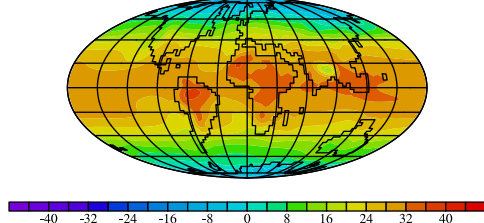

Precipitation (in mm/day)  
39.5 MaBP

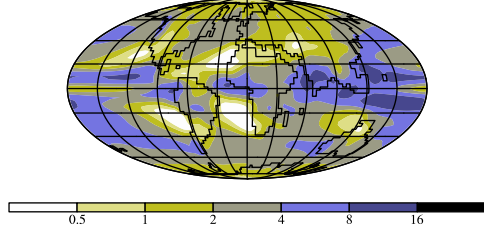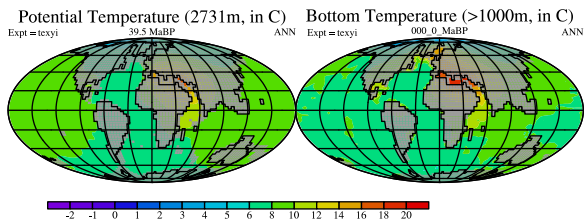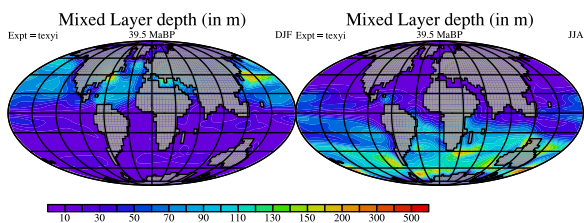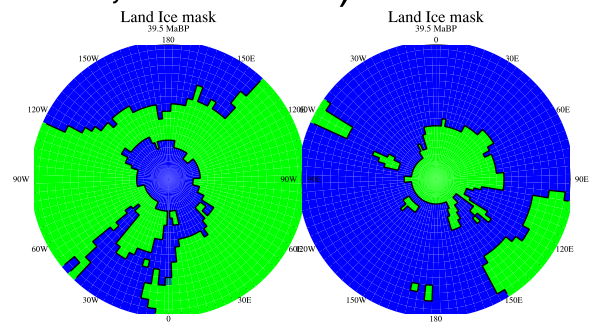

CO<sub>2</sub>= 796 ppmv

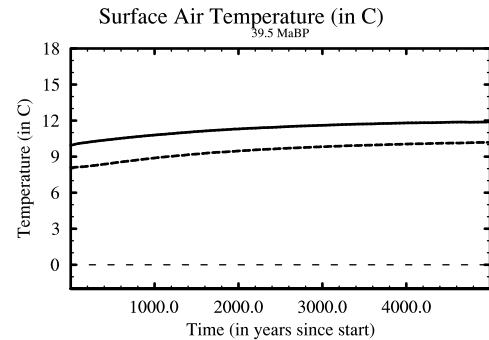

Surface Air Temperature (in C)  
39.5 MaBP

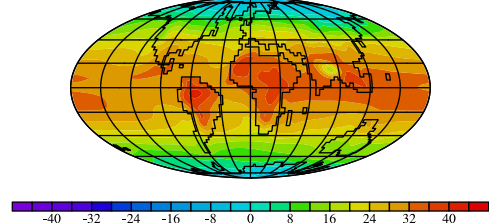

Precipitation (in mm/day)  
39.5 MaBP

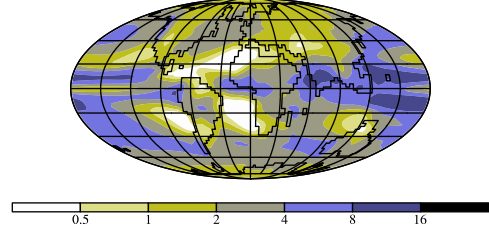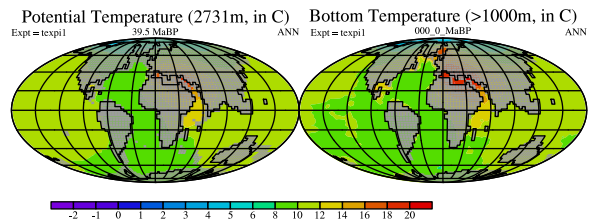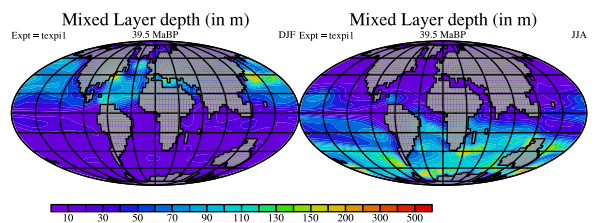

# early Middle Eocene (Lutetian, 44.5 Ma)

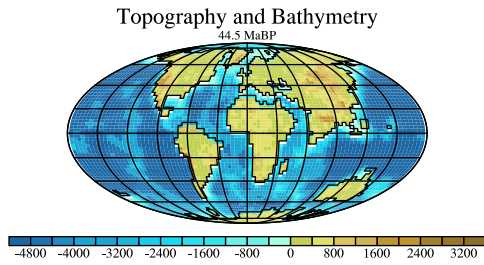

CO<sub>2</sub>= 594 ppmv

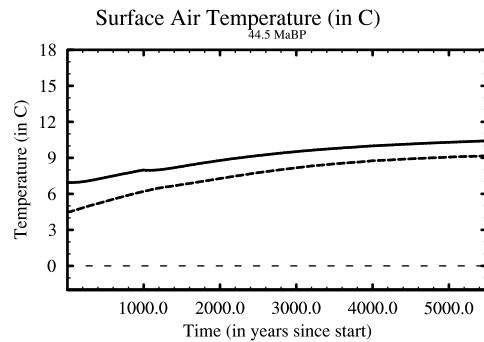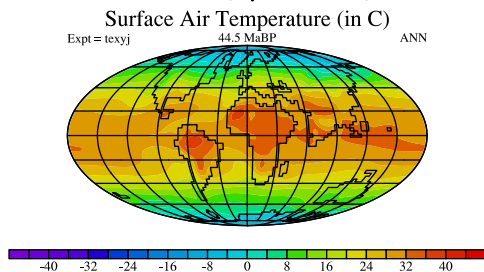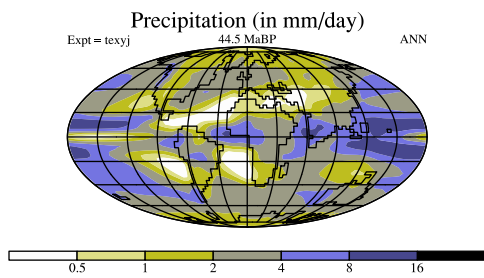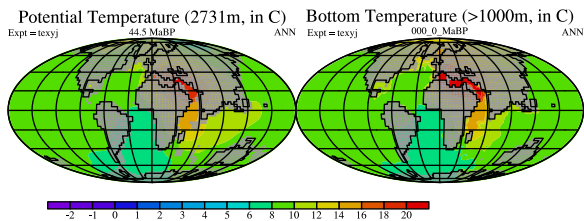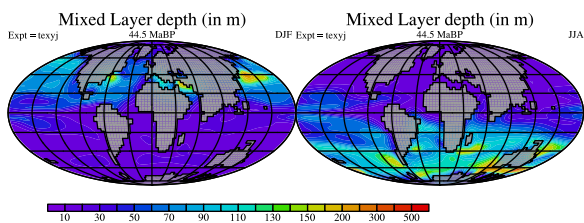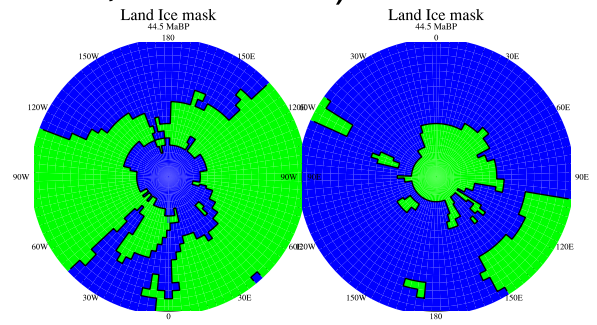

CO<sub>2</sub>= 751 ppmv

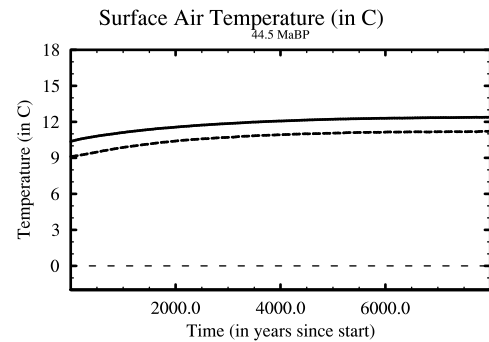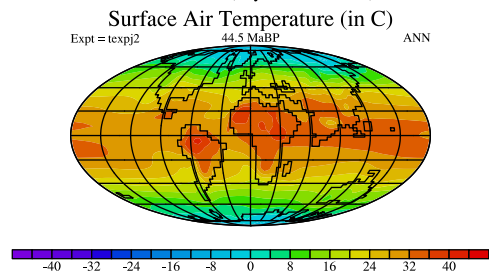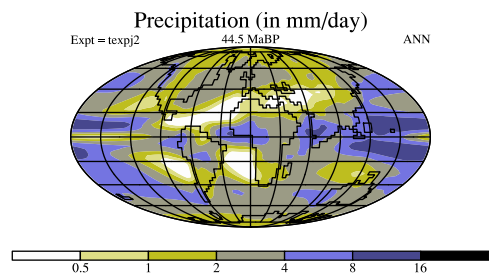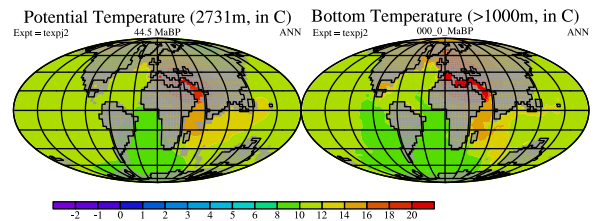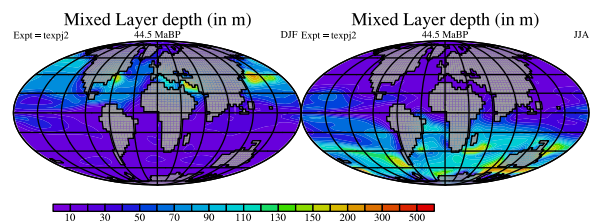



# Early Eocene (Ypresian, 51.9 Ma)

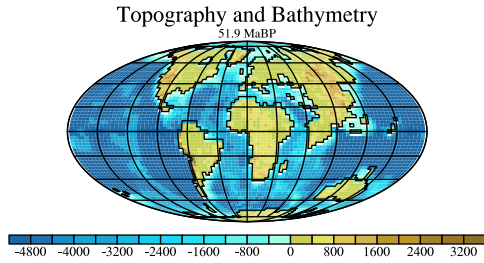

CO<sub>2</sub>= 649 ppmv

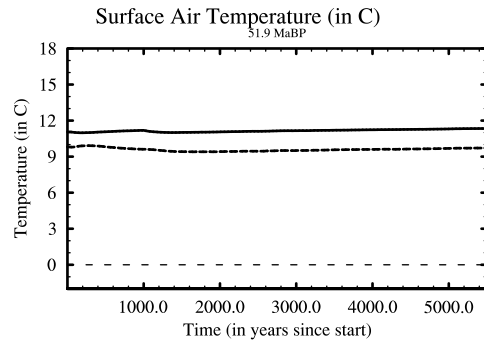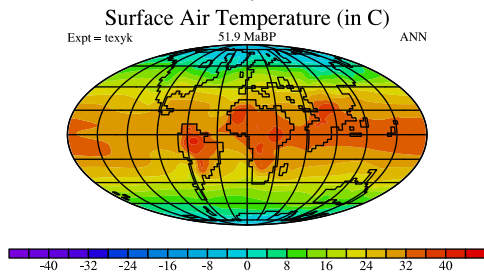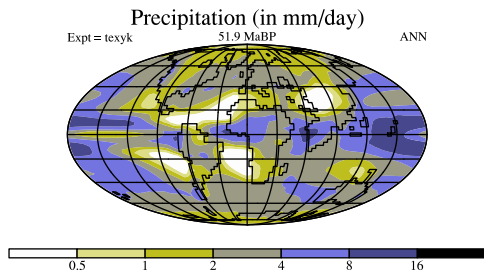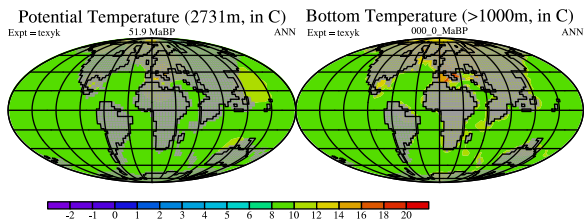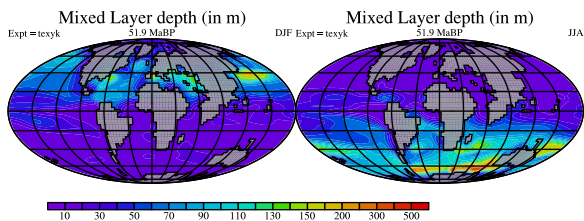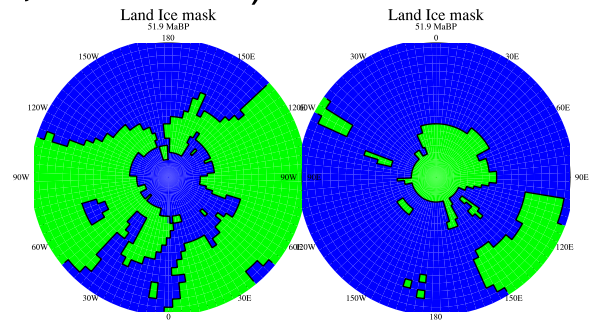

CO<sub>2</sub>= 736 ppmv

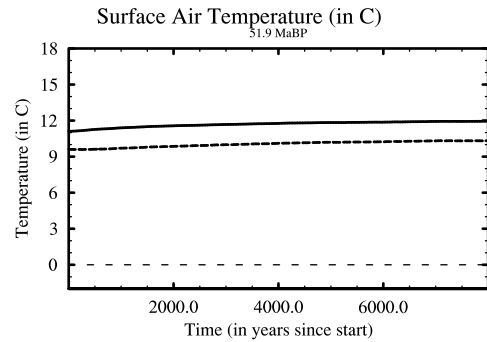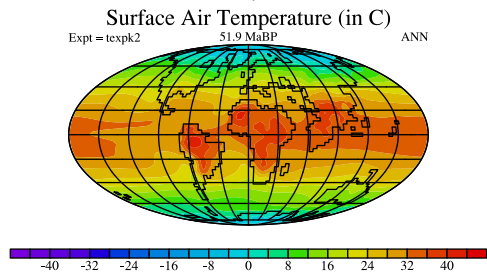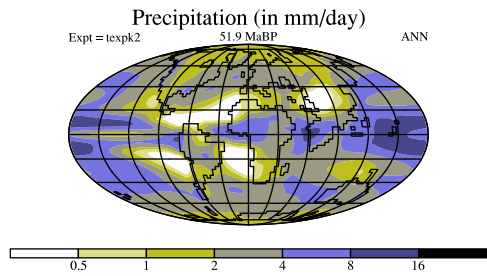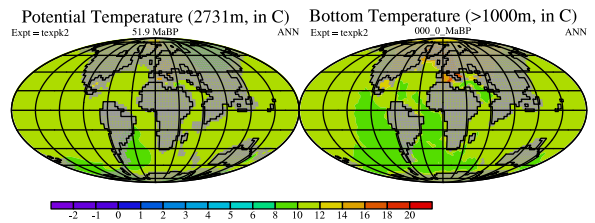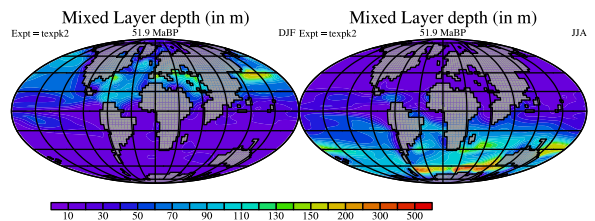

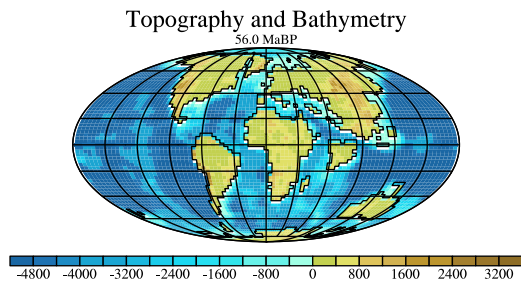

CO<sub>2</sub>= 630 ppmv

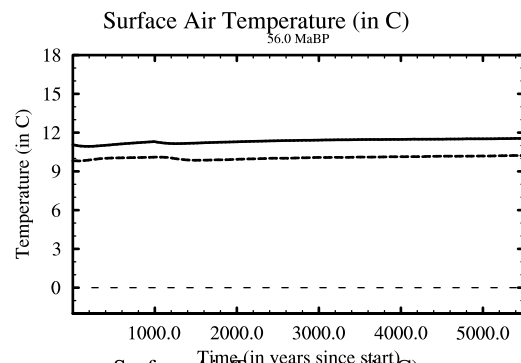

Surface Air Temperature (in C)  
56.0 MaBP

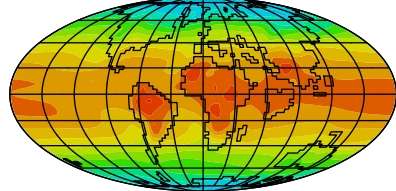

Precipitation (in mm/day)  
56.0 MaBP

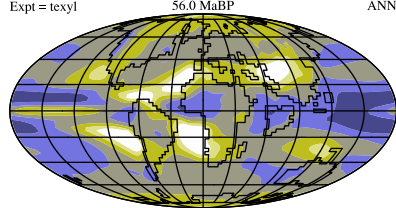

Potential Temperature (2731m, in C) Bottom Temperature (>1000m, in C)

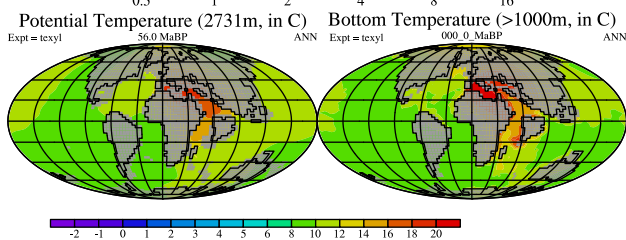

Mixed Layer depth (in m) DJF Expt = texyl 56.0 MaBP JJA

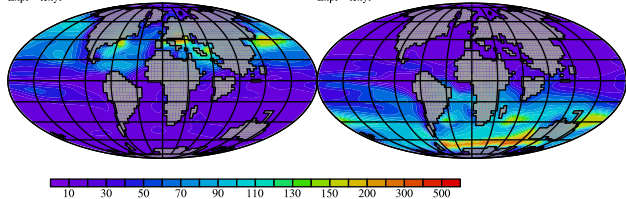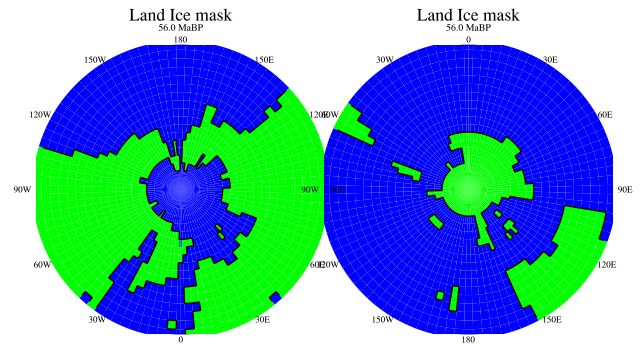

CO<sub>2</sub>= 570 ppmv

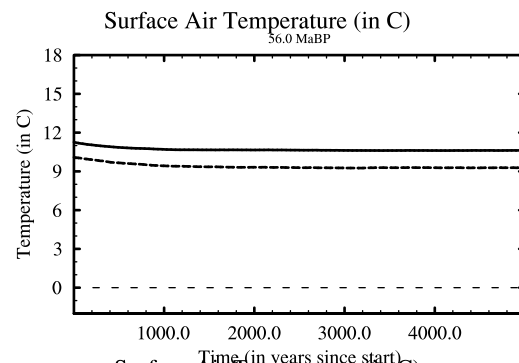

Surface Air Temperature (in C)  
56.0 MaBP

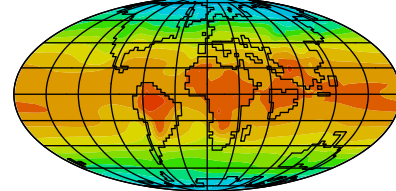

Precipitation (in mm/day)  
56.0 MaBP

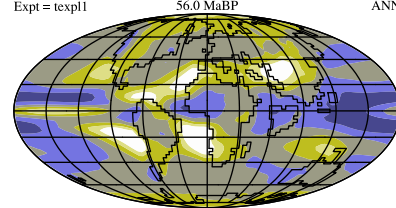

Potential Temperature (2731m, in C) Bottom Temperature (>1000m, in C)

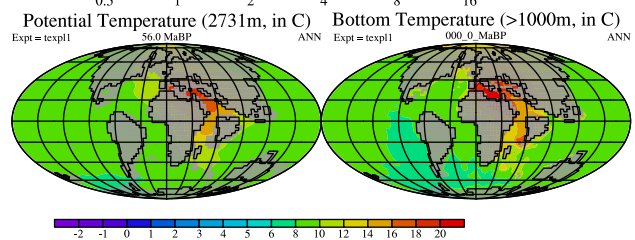

Mixed Layer depth (in m) DJF Expt = texpl1 56.0 MaBP JJA

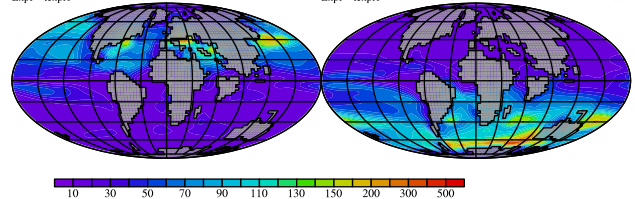

# Paleocene (Danian&Thanetian, 61 Ma)

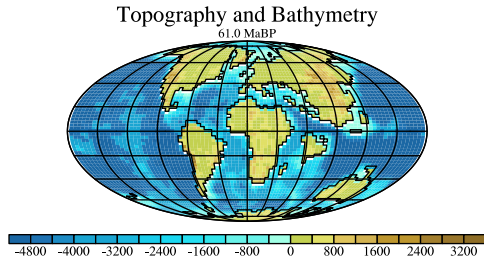

CO<sub>2</sub>= 604 ppmv

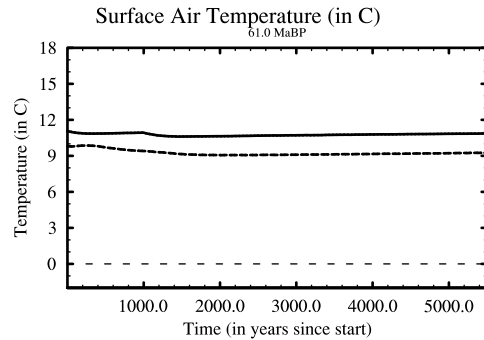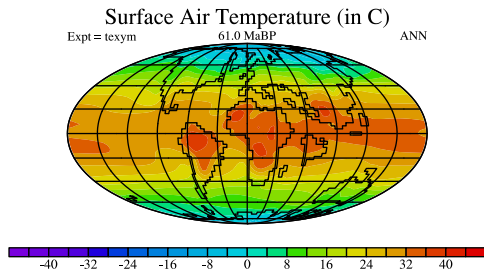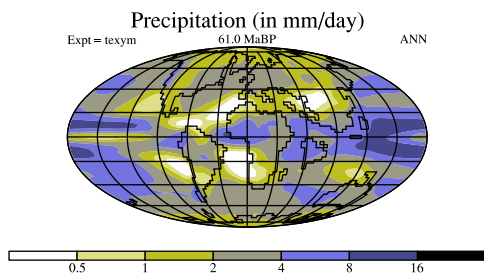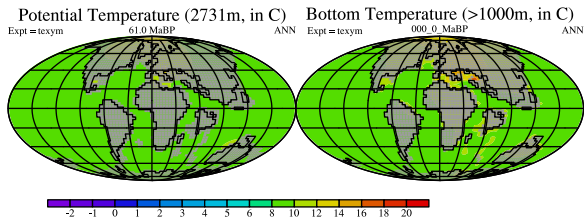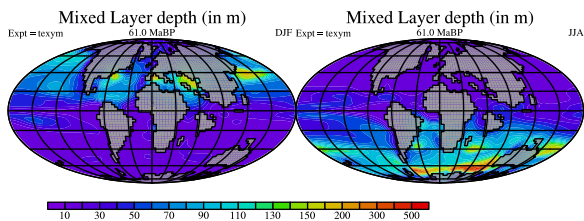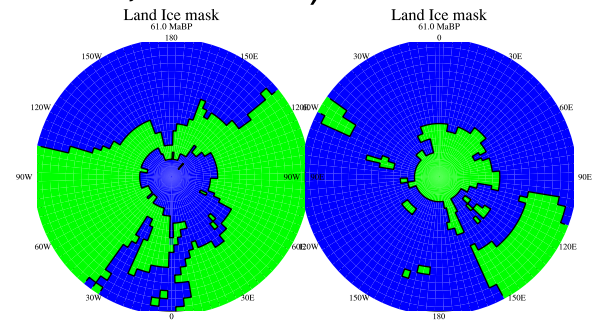

CO<sub>2</sub>= 335 ppmv

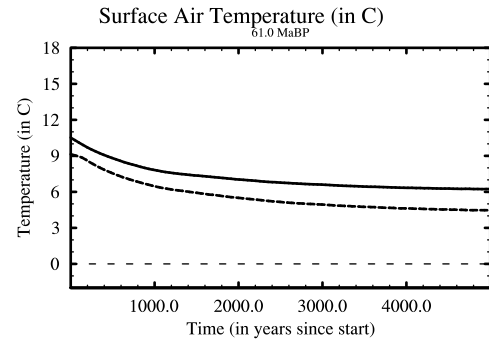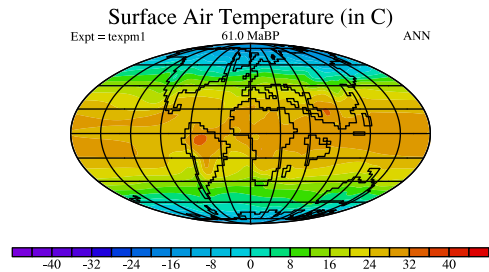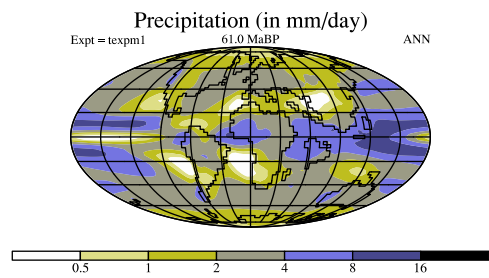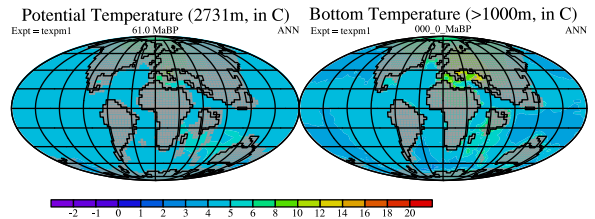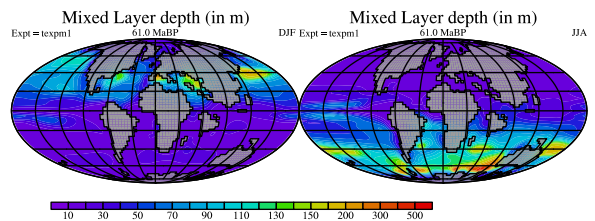



# KT Boundary (latest Maastrichtian, 66 Ma)

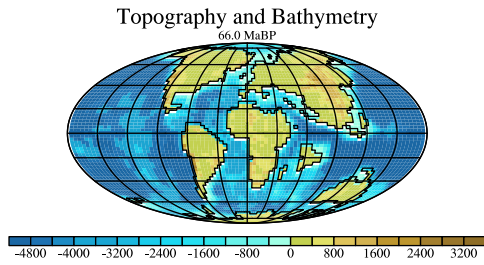

CO<sub>2</sub> = 576 ppmv

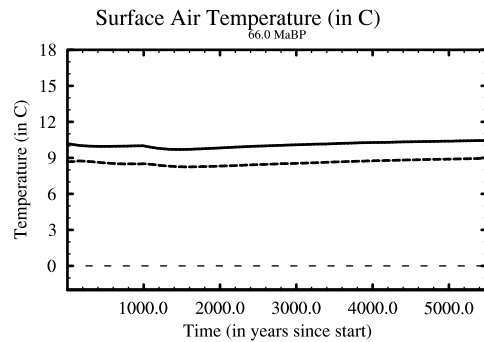

Surface Air Temperature (in C)  
Expt = texyn 66.0 MaBP ANN

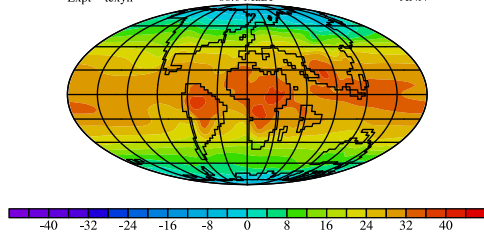

Precipitation (in mm/day)  
Expt = texyn 66.0 MaBP ANN

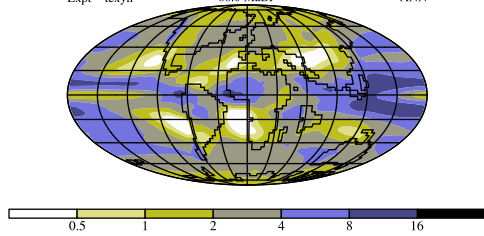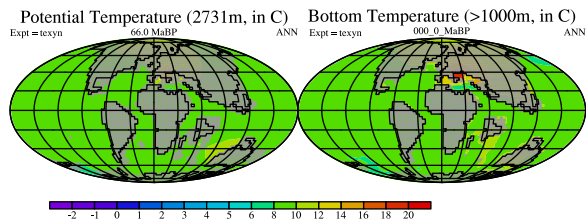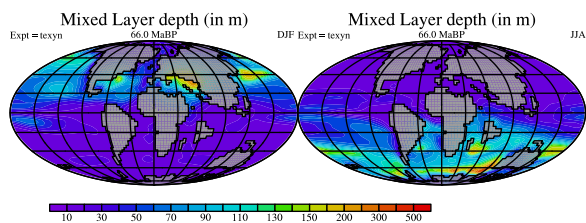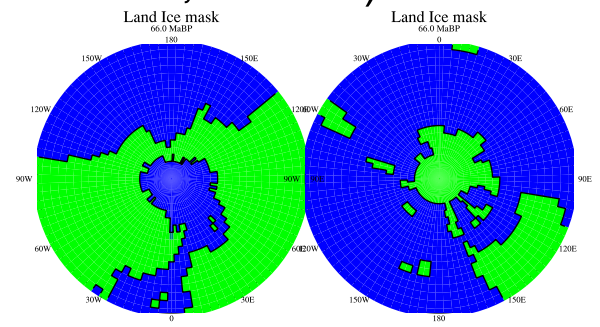

CO<sub>2</sub> = 229 ppmv

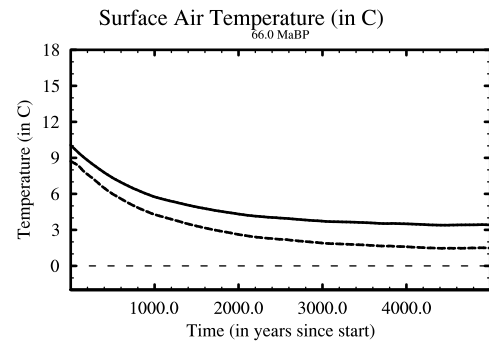

Surface Air Temperature (in C)  
Expt = texpn1 66.0 MaBP ANN

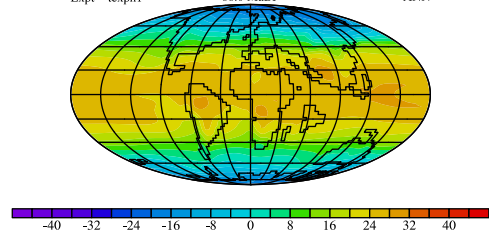

Precipitation (in mm/day)  
Expt = texpn1 66.0 MaBP ANN

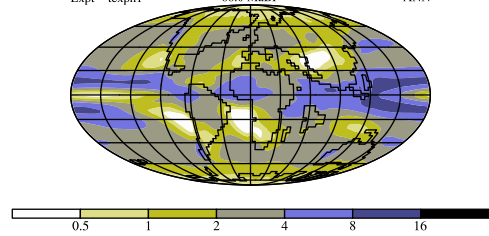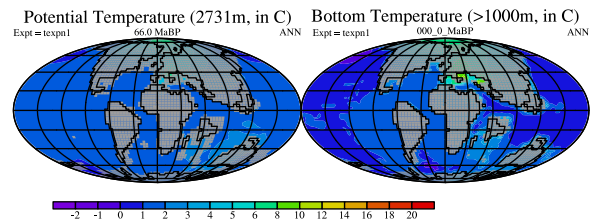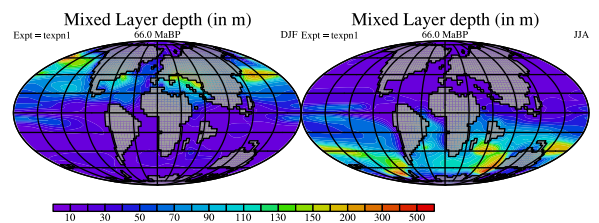

# Late Cretaceous (Maastrichtian, 69 Ma)

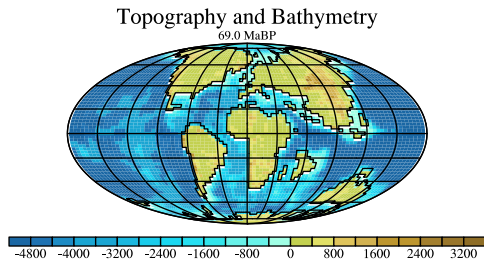

CO<sub>2</sub>= 560 ppmv

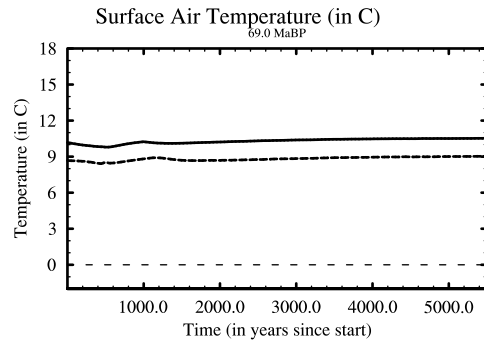

Surface Air Temperature (in C)  
Expt = texyo 69.0 MaBP ANN

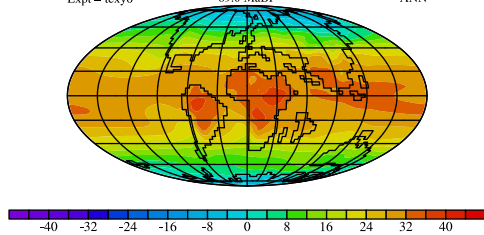

Precipitation (in mm/day)  
Expt = texyo 69.0 MaBP ANN

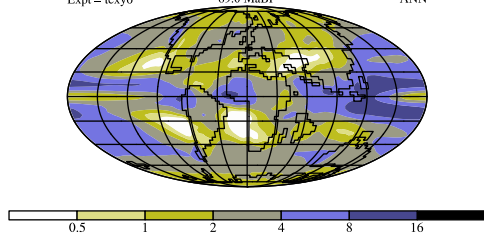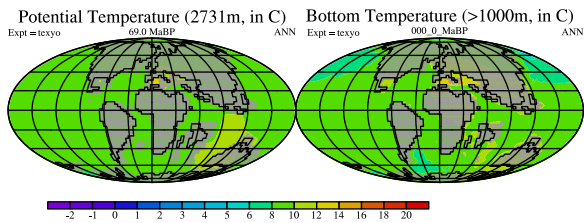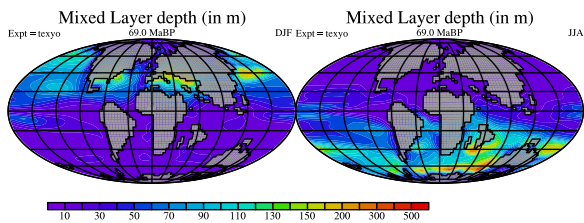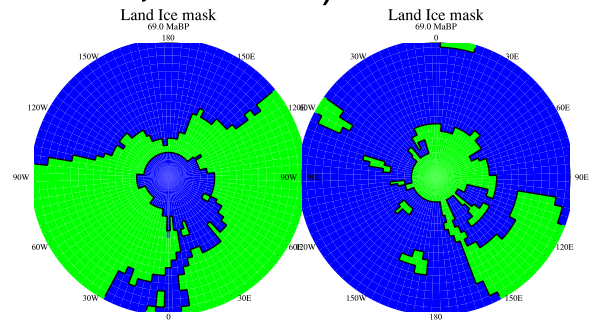

CO<sub>2</sub>= 262 ppmv

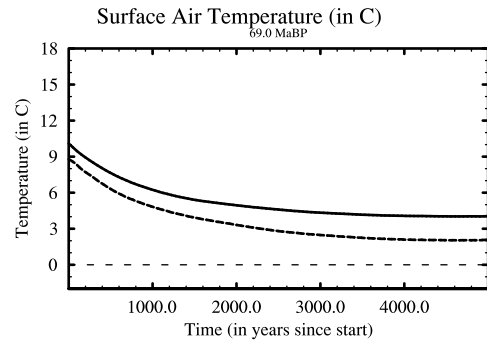

Surface Air Temperature (in C)  
Expt = texpo1 69.0 MaBP ANN

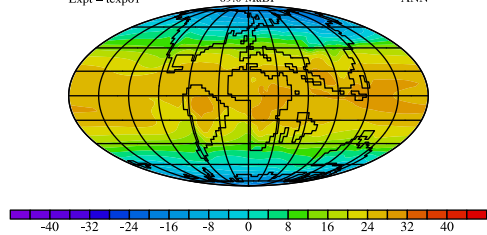

Precipitation (in mm/day)  
Expt = texpo1 69.0 MaBP ANN

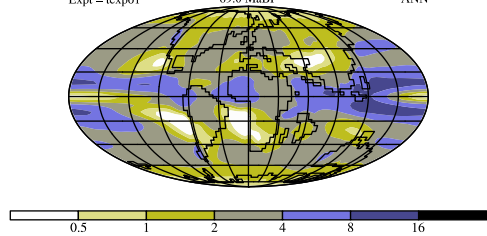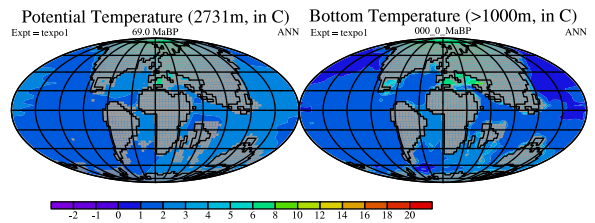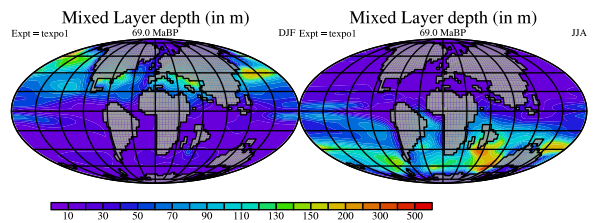



# Late Cretaceous (Late Campanian, 75 Ma)

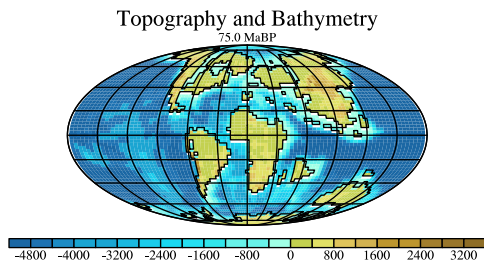

CO<sub>2</sub>= 633 ppmv

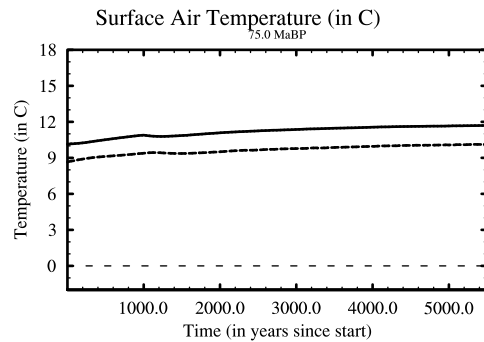

Surface Air Temperature (in C)  
Expt = texyp ANN

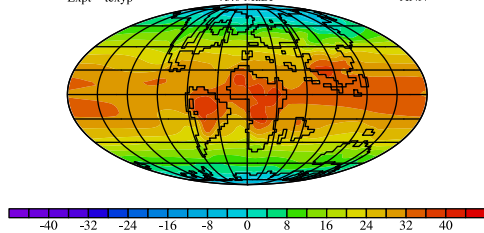

Precipitation (in mm/day)  
Expt = texyp ANN

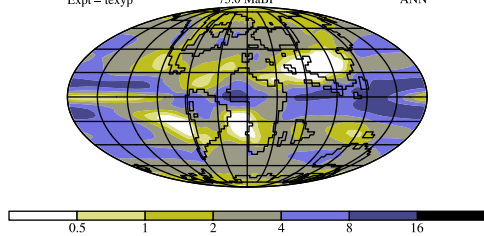

Potential Temperature (2731m, in C) Bottom Temperature (>1000m, in C)  
Expt = texyp ANN Expt = texyp ANN

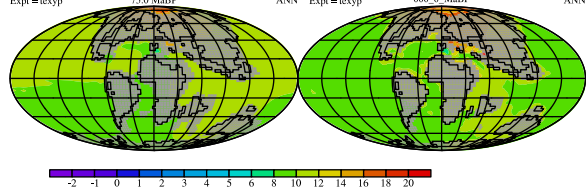

Mixed Layer depth (in m) Mixed Layer depth (in m)  
Expt = texyp DJF Expt = texyp ANN

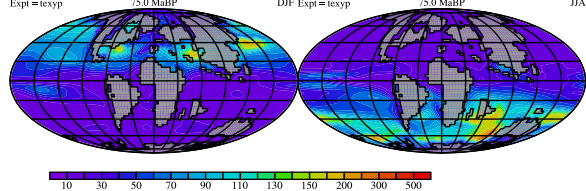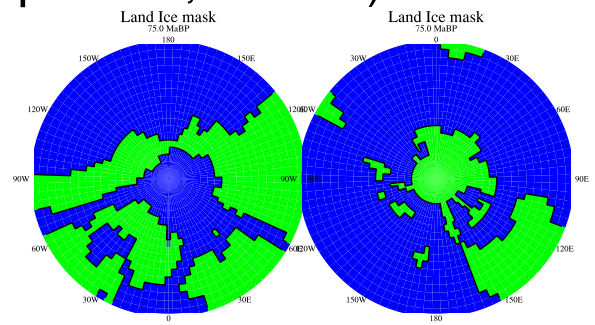

CO<sub>2</sub>= 559 ppmv

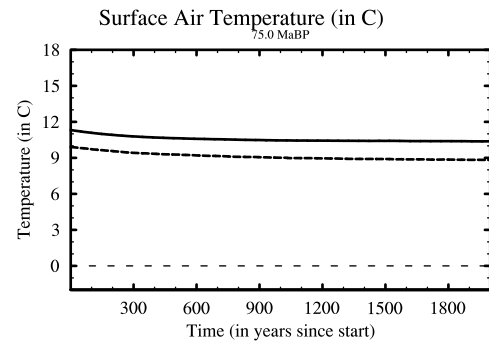

Surface Air Temperature (in C)  
Expt = texpp ANN

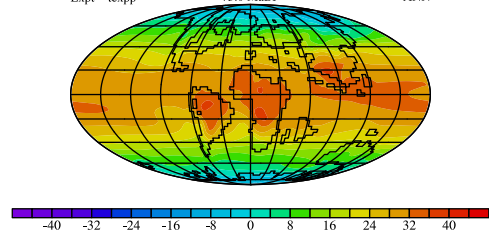

Precipitation (in mm/day)  
Expt = texpp ANN

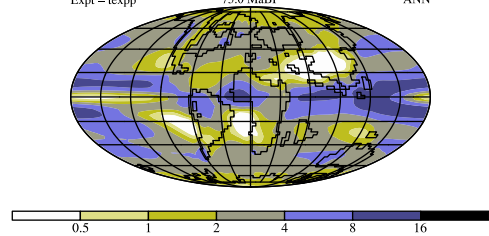

Potential Temperature (2731m, in C) Bottom Temperature (>1000m, in C)  
Expt = texpp ANN Expt = texpp ANN

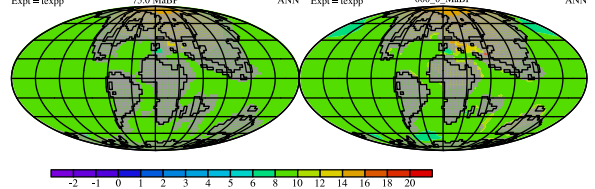

Mixed Layer depth (in m) Mixed Layer depth (in m)  
Expt = texpp DJF Expt = texpp ANN

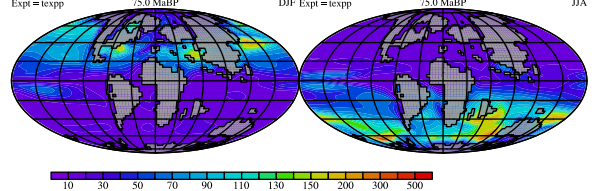

# Late Cretaceous (Early Campanian, 80.8 Ma)

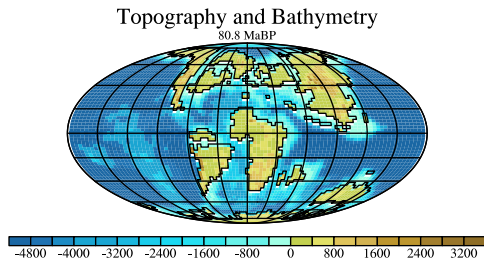

CO<sub>2</sub> = 704 ppmv

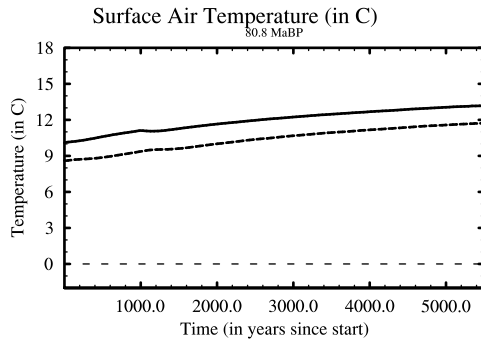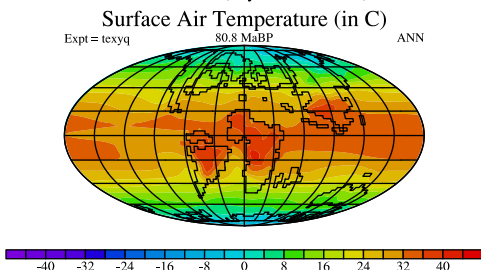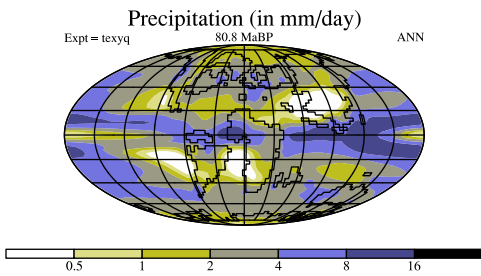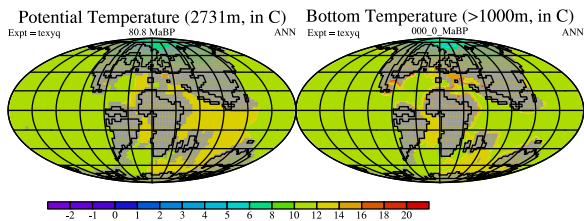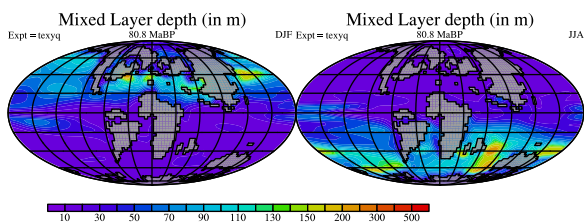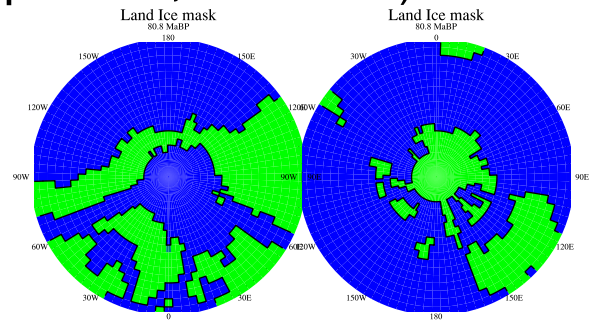

CO<sub>2</sub> = 667 ppmv

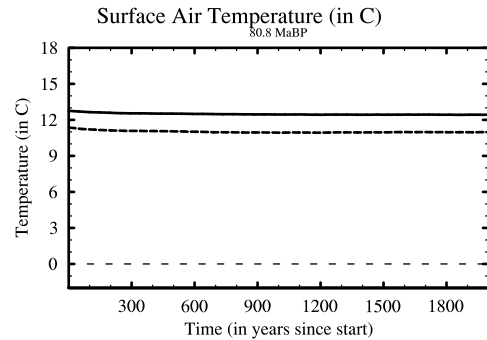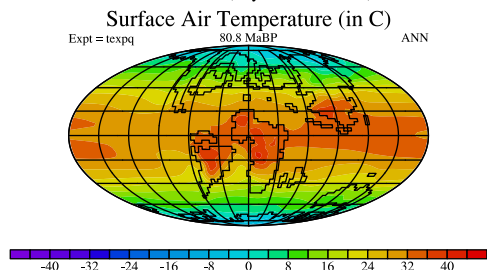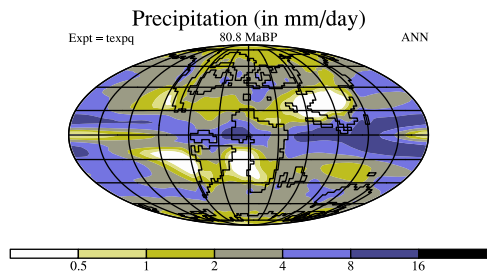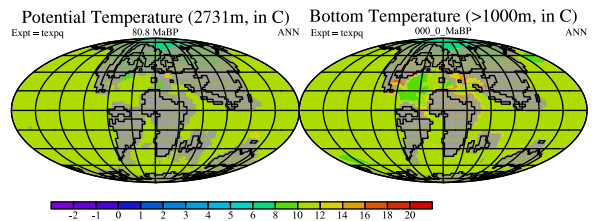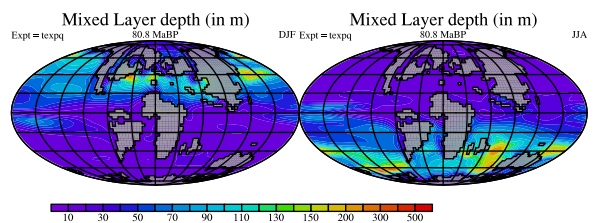

# Late Cretaceous (Santonian&Coniacian, 86.7 Ma)

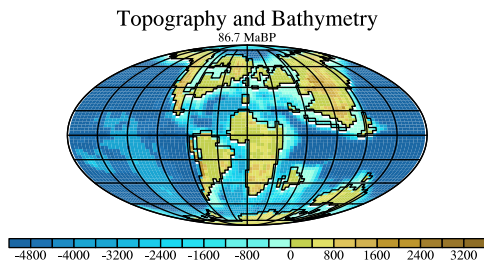

CO<sub>2</sub> = 775 ppmv

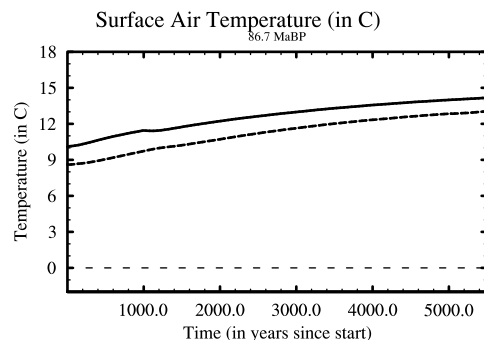

Surface Air Temperature (in C)  
86.7 MaBP

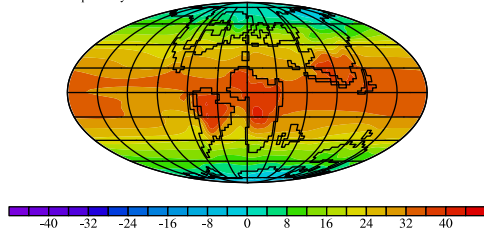

Precipitation (in mm/day)  
86.7 MaBP

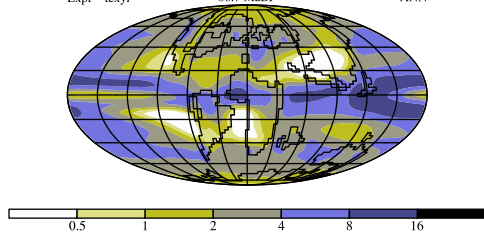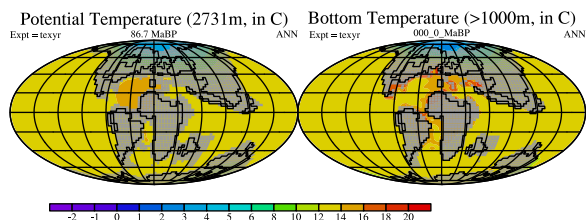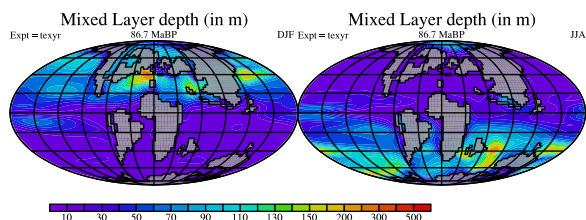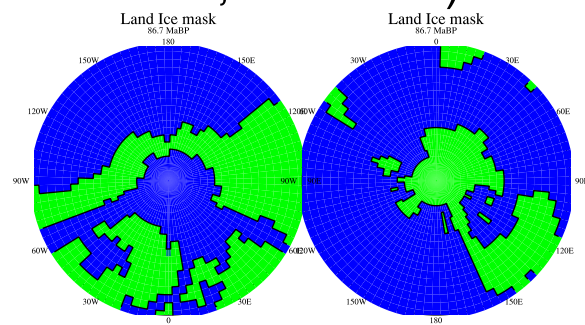

CO<sub>2</sub> = 590 ppmv

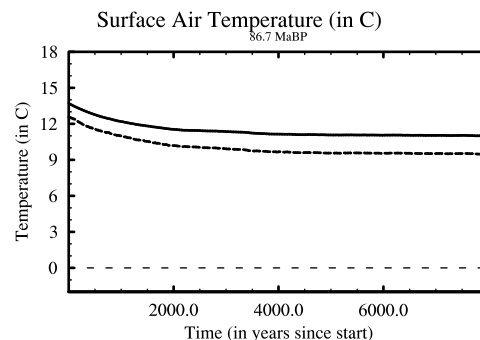

Surface Air Temperature (in C)  
86.7 MaBP

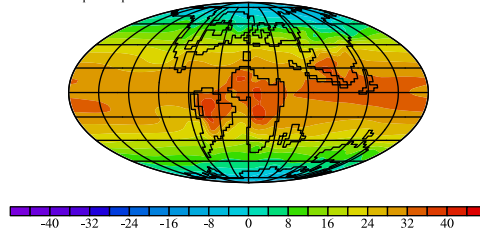

Precipitation (in mm/day)  
86.7 MaBP

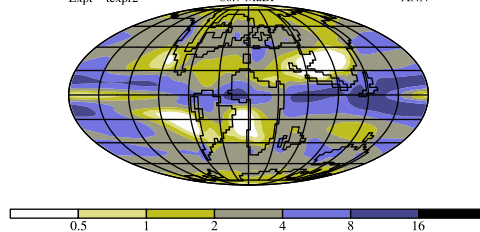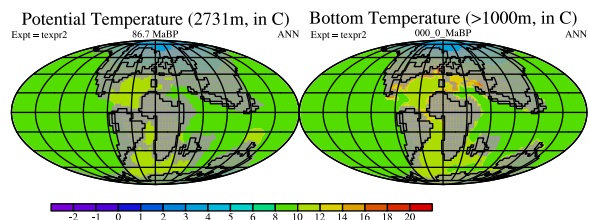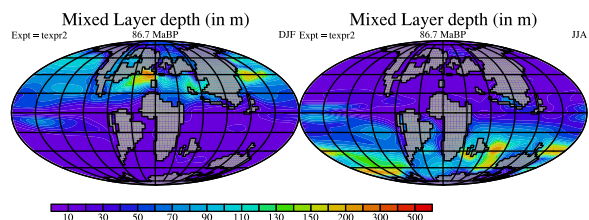



# Mid-Cretaceous (Turonian , 91.9 Ma)

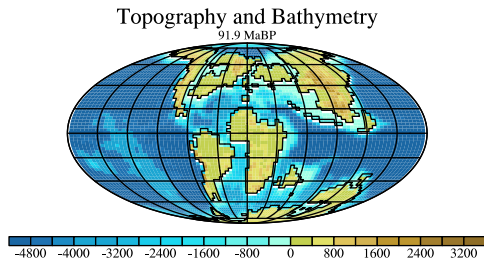

CO<sub>2</sub>= 839 ppmv

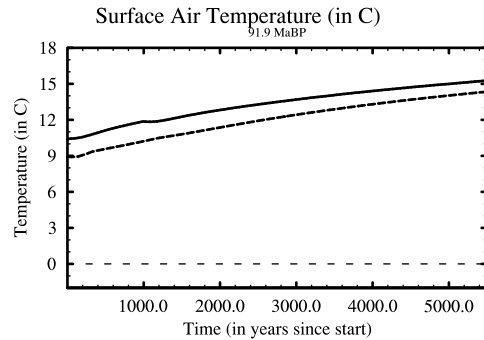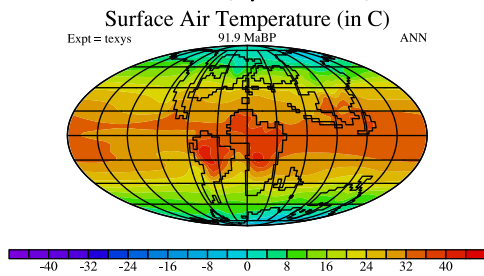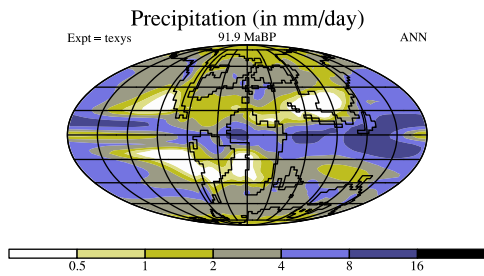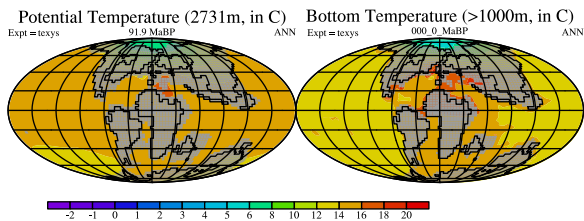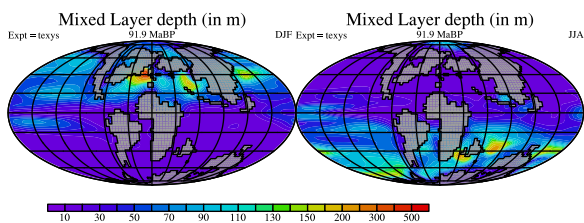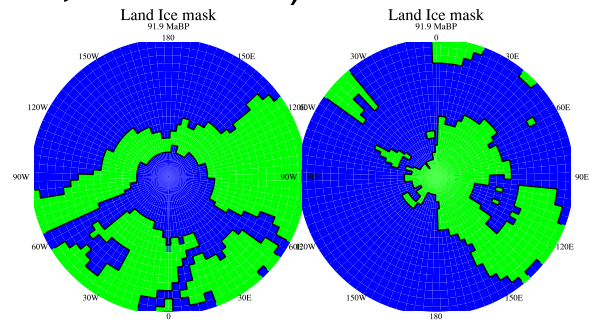

CO<sub>2</sub>= 466 ppmv

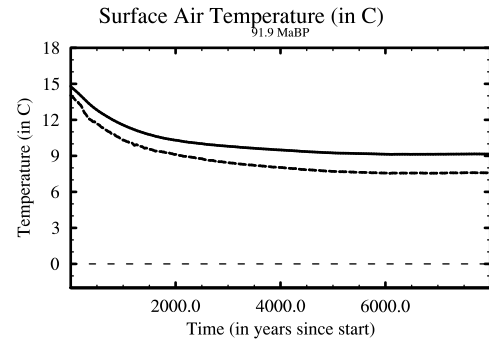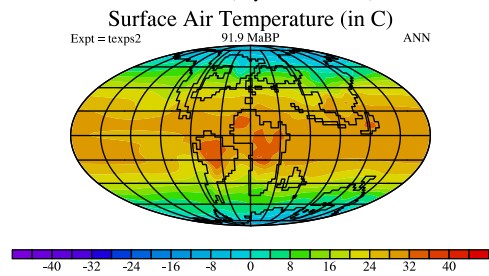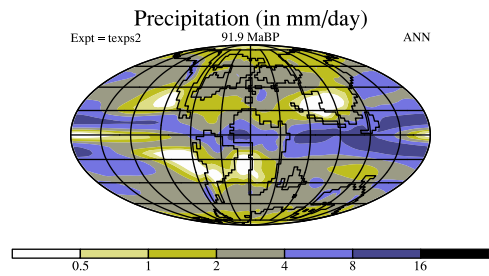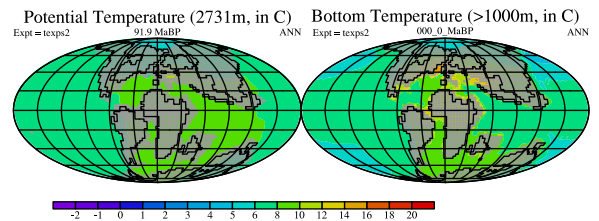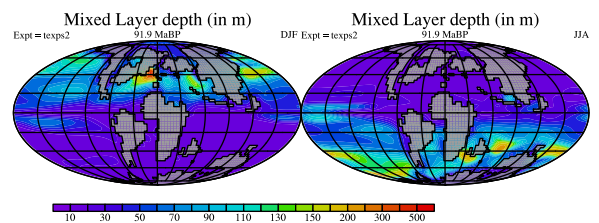

# Mid-Cretaceous (Cenomanian, 97.2 Ma)

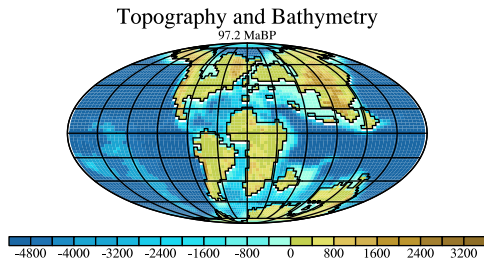

CO<sub>2</sub>= 840 ppmv

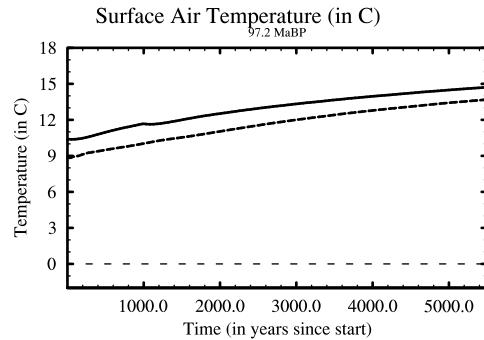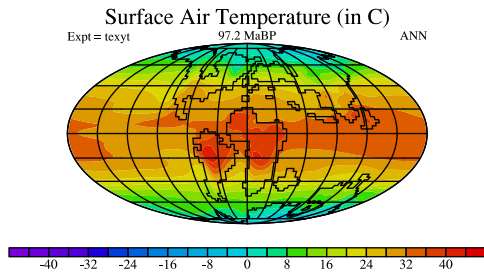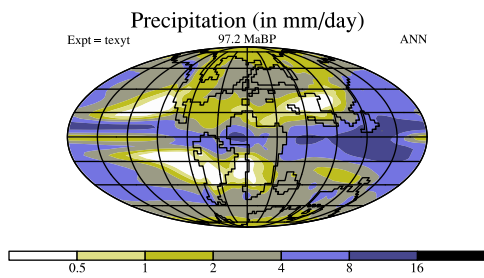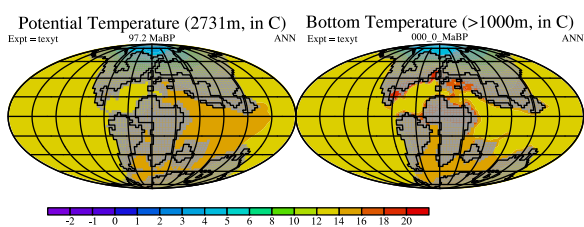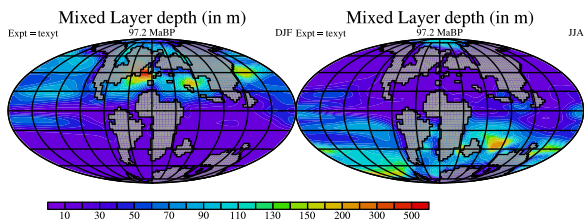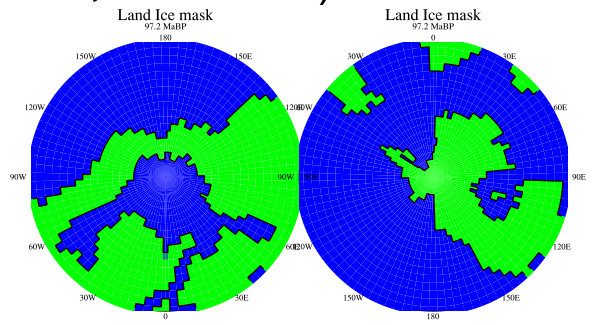

CO<sub>2</sub>= 707 ppmv

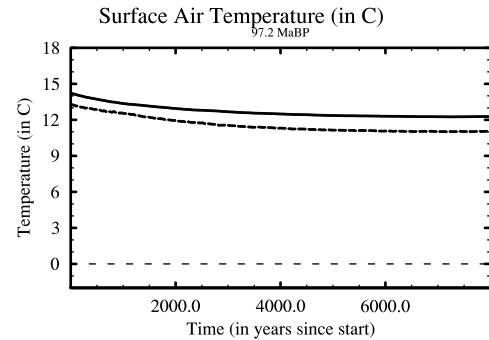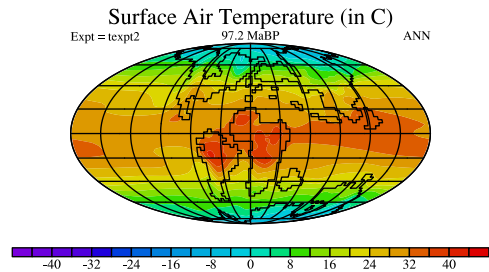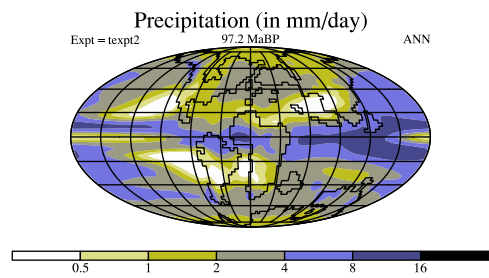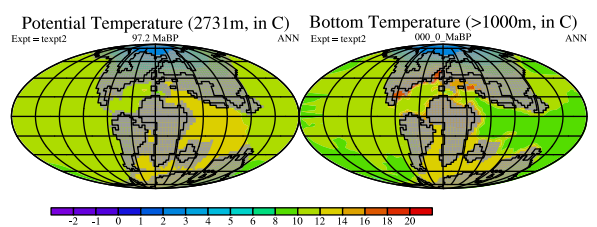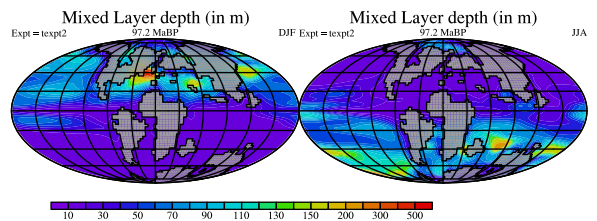

# Early Cretaceous (late Albian, 102.6 Ma)

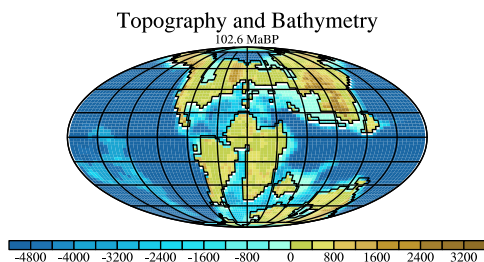

CO<sub>2</sub>= 840 ppmv

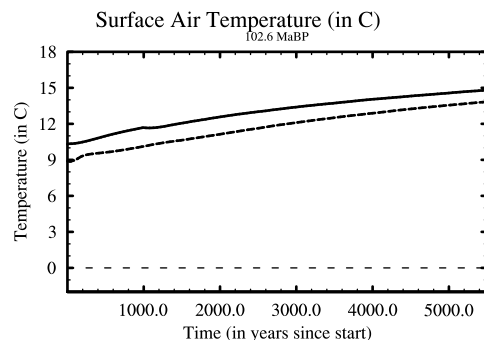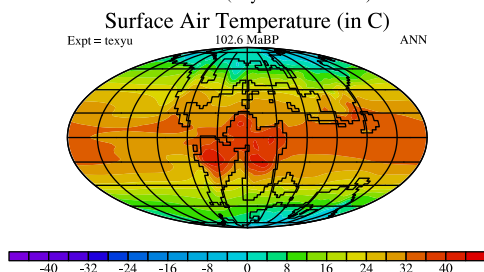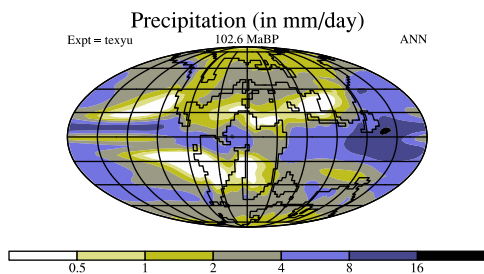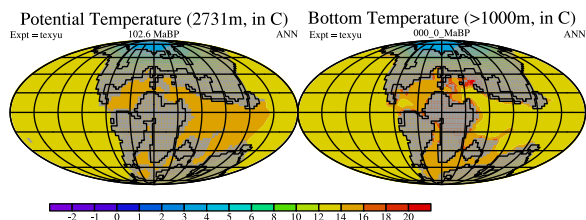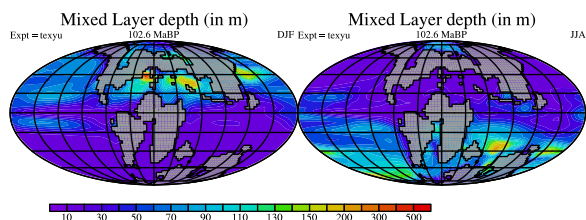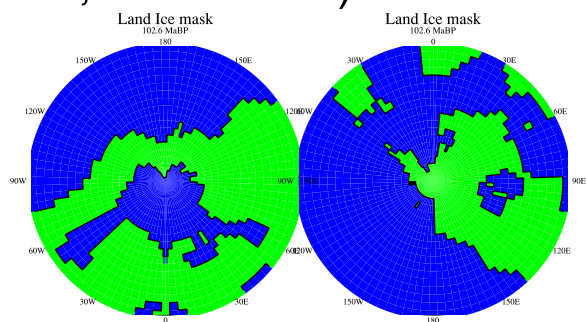

CO<sub>2</sub>= 1008 ppmv

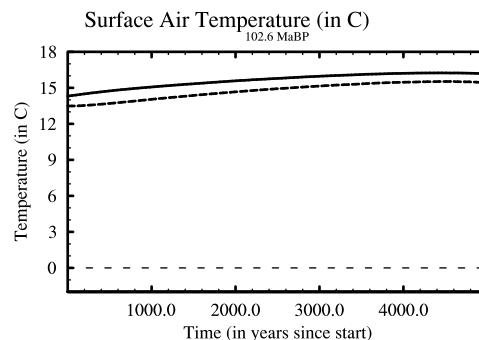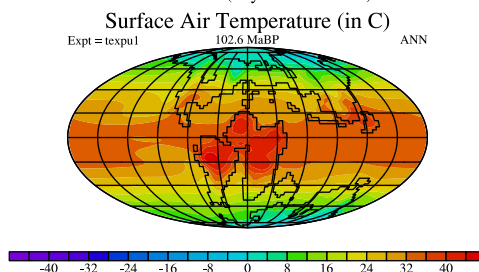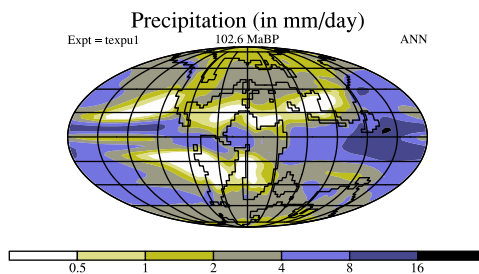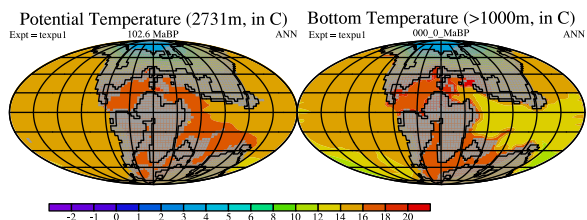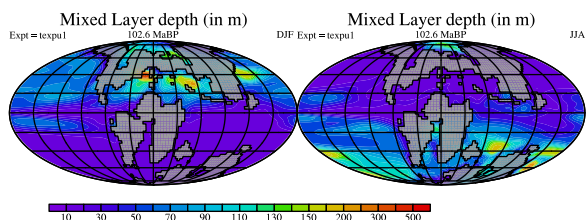



# Early Cretaceous (middle Albian, 107 Ma)

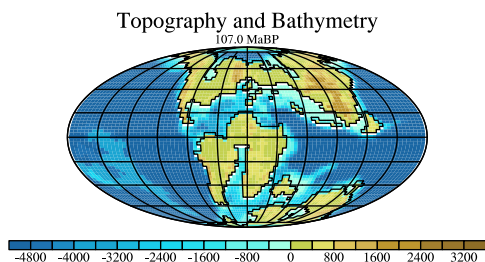

CO<sub>2</sub>= 840 ppmv

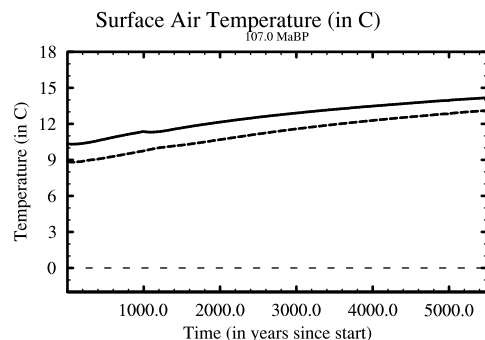

Surface Air Temperature (in C)  
Expt = texyv 107.0 MaBP ANN

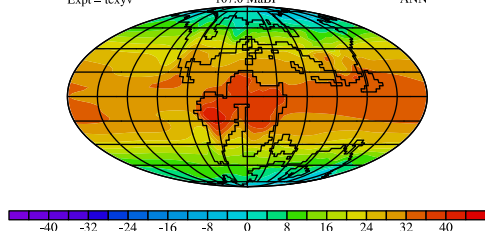

Precipitation (in mm/day)  
Expt = texyv 107.0 MaBP ANN

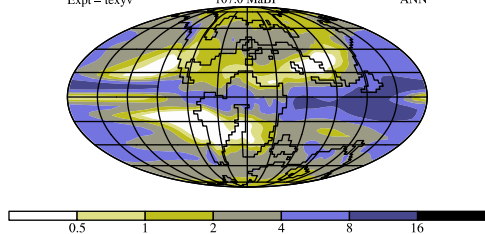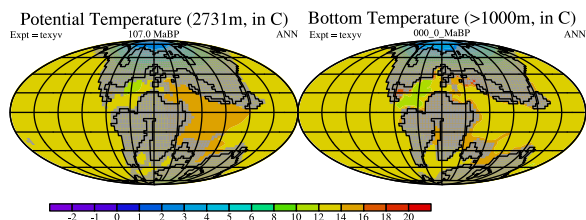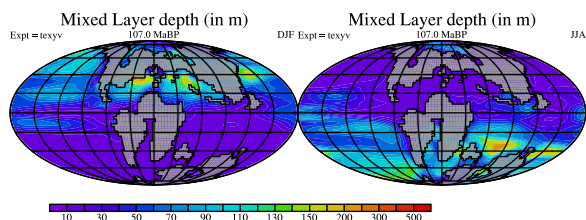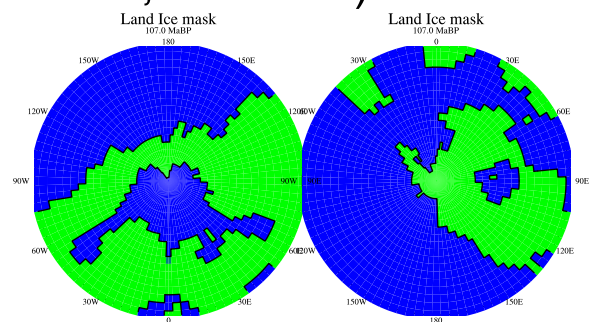

CO<sub>2</sub>= 1028 ppmv

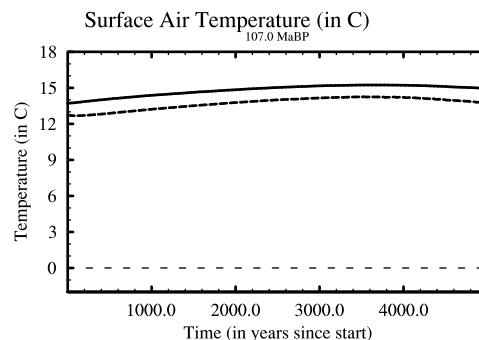

Surface Air Temperature (in C)  
Expt = texpv1 107.0 MaBP ANN

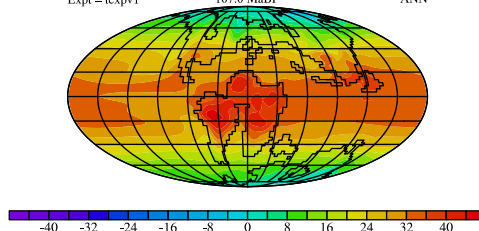

Precipitation (in mm/day)  
Expt = texpv1 107.0 MaBP ANN

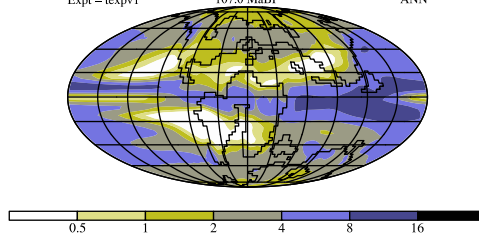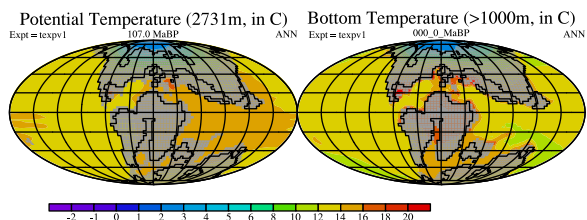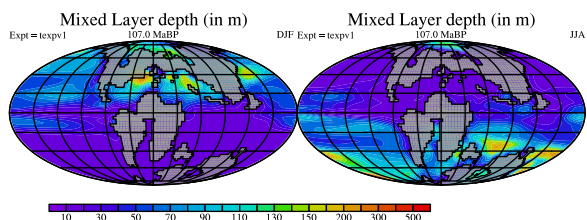

# Early Cretaceous (early Albian, 111 Ma)

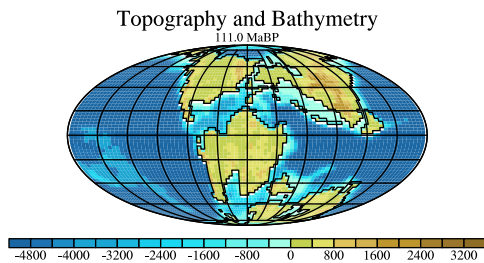

CO<sub>2</sub>= 827 ppmv

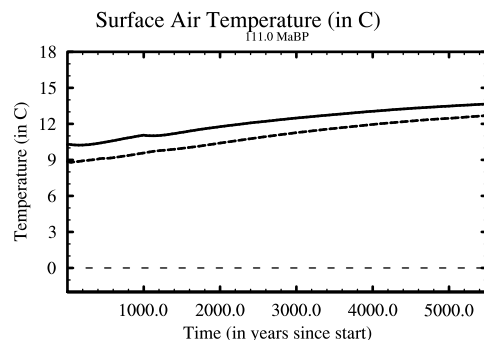

Surface Air Temperature (in C)  
Expt = texyw 111.0 MaBP ANN

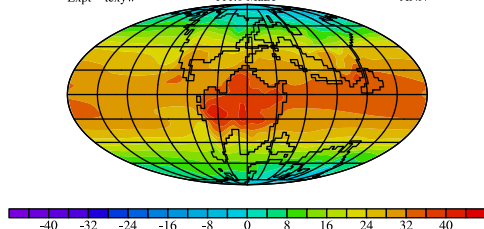

Precipitation (in mm/day)  
Expt = texyw 111.0 MaBP ANN

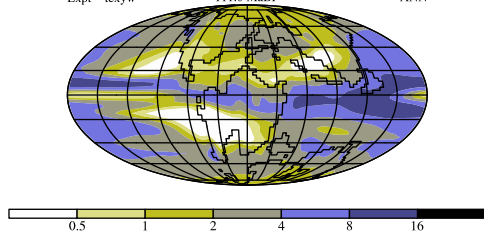

Potential Temperature (2731m, in C) Bottom Temperature (>1000m, in C)  
Expt = texyw 111.0 MaBP ANN Expt = texyw 000.0 MaBP ANN

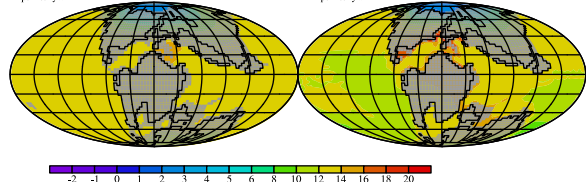

Mixed Layer depth (in m) Mixed Layer depth (in m)  
Expt = texyw 111.0 MaBP DJF Expt = texyw 111.0 MaBP JJA

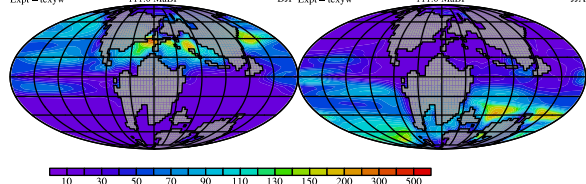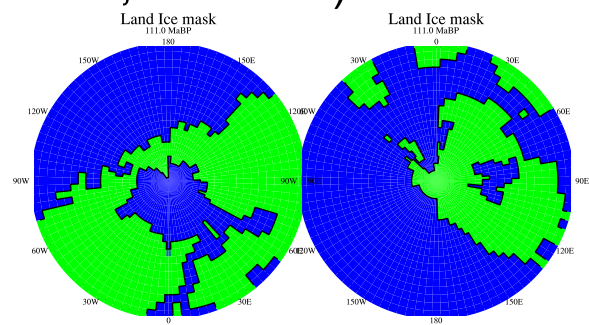

CO<sub>2</sub>= 1148 ppmv

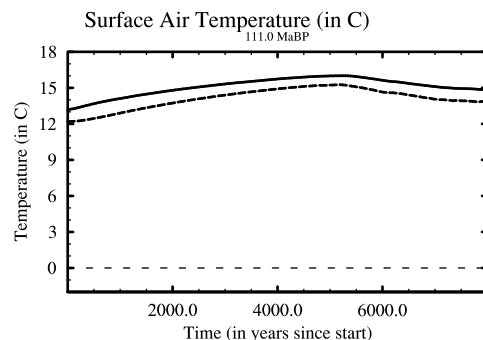

Surface Air Temperature (in C)  
Expt = texpw2 111.0 MaBP ANN

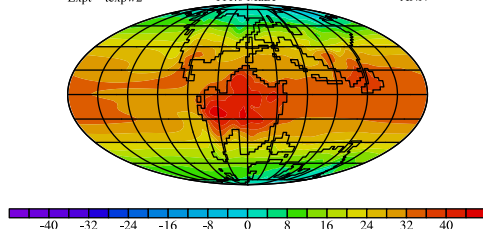

Precipitation (in mm/day)  
Expt = texpw2 111.0 MaBP ANN

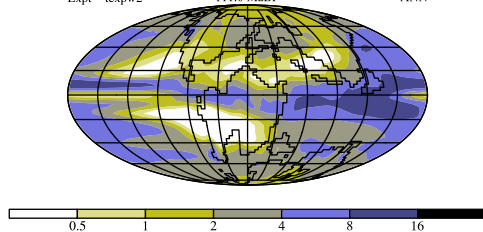

Potential Temperature (2731m, in C) Bottom Temperature (>1000m, in C)  
Expt = texpw2 111.0 MaBP ANN Expt = texpw2 000.0 MaBP ANN

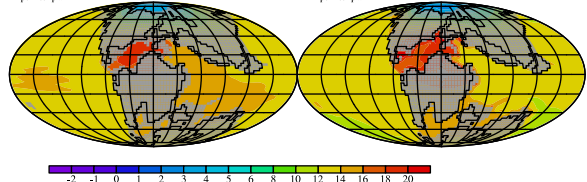

Mixed Layer depth (in m) Mixed Layer depth (in m)  
Expt = texpw2 111.0 MaBP DJF Expt = texpw2 111.0 MaBP JJA

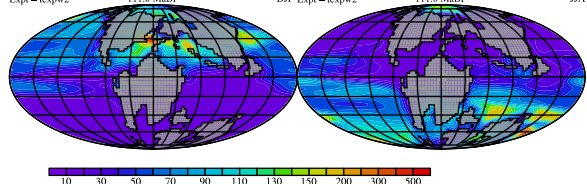



# Early Cretaceous (late Aptian, 115.8 Ma)

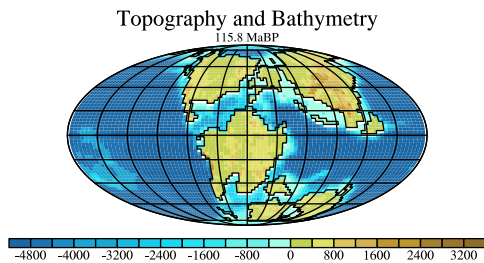

CO<sub>2</sub>= 811 ppmv

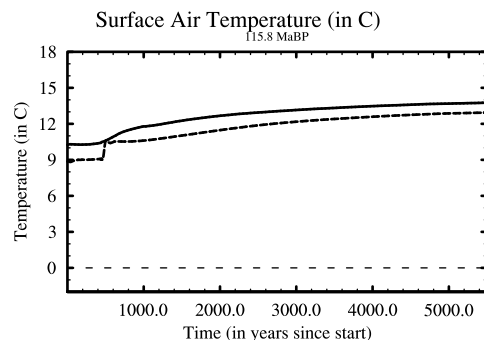

Surface Air Temperature (in C)  
Expt = texyx 115.8 MaBP ANN

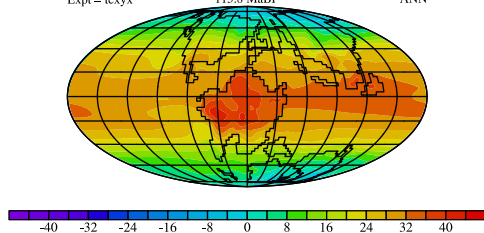

Precipitation (in mm/day)  
Expt = texyx 115.8 MaBP ANN

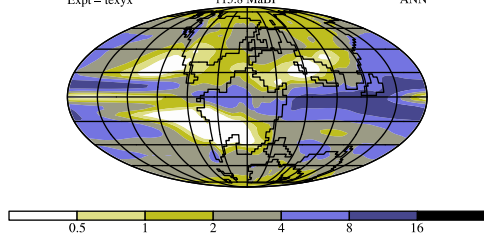

Potential Temperature (2731m, in C) Bottom Temperature (>1000m, in C)  
Expt = texyx 115.8 MaBP ANN Expt = texyx 000.0 MaBP ANN

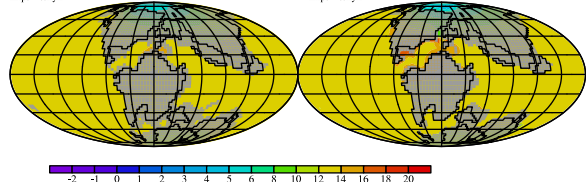

Mixed Layer depth (in m) Mixed Layer depth (in m)  
Expt = texyx 115.8 MaBP DJF Expt = texyx 115.8 MaBP JJA

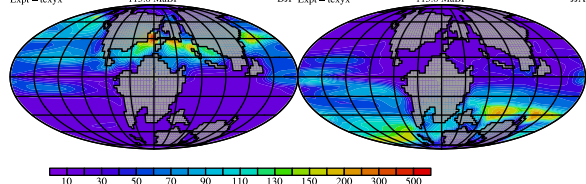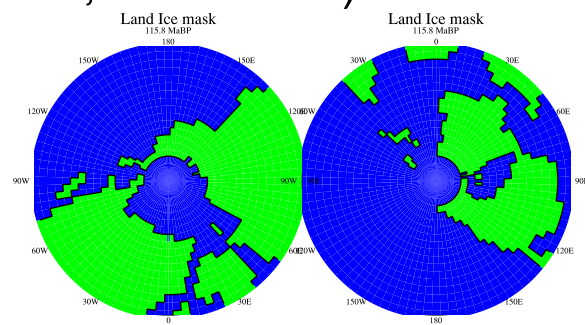

CO<sub>2</sub>= 1103 ppmv

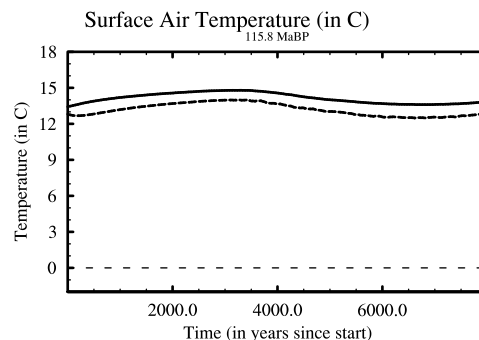

Surface Air Temperature (in C)  
Expt = texpx2 115.8 MaBP ANN

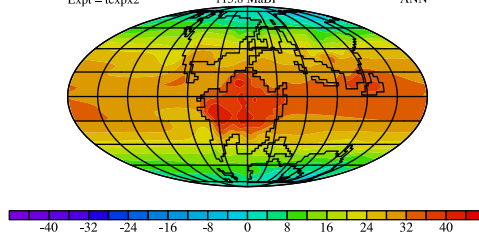

Precipitation (in mm/day)  
Expt = texpx2 115.8 MaBP ANN

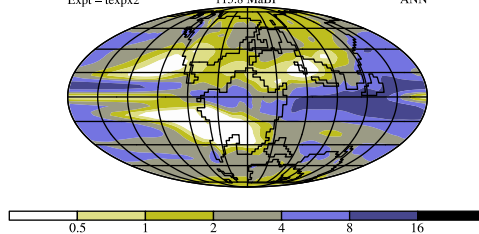

Potential Temperature (2731m, in C) Bottom Temperature (>1000m, in C)  
Expt = texpx2 115.8 MaBP ANN Expt = texpx2 000.0 MaBP ANN

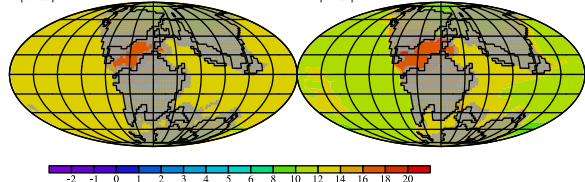

Mixed Layer depth (in m) Mixed Layer depth (in m)  
Expt = texpx2 115.8 MaBP DJF Expt = texpx2 115.8 MaBP JJA

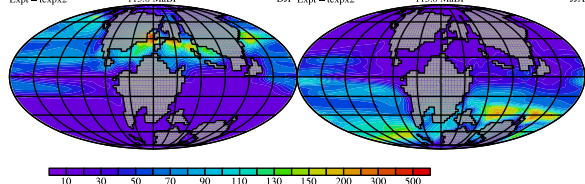

# Early Cretaceous (early Aptian, 121.8 Ma)

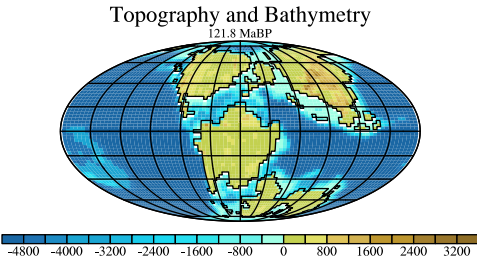

CO<sub>2</sub> = 784 ppmv

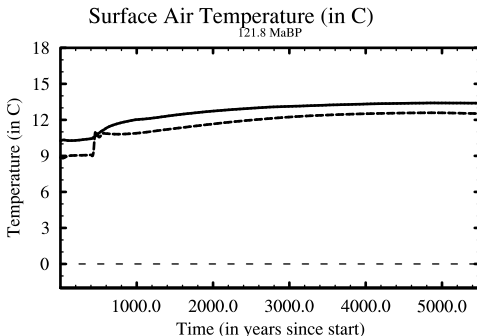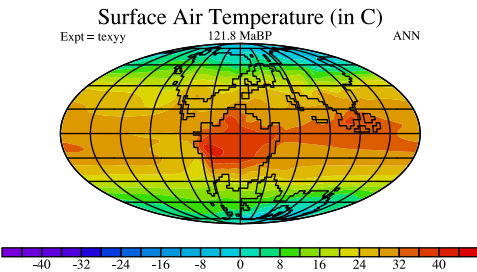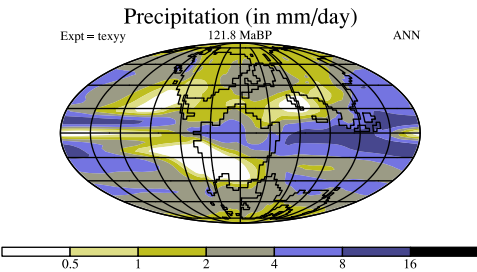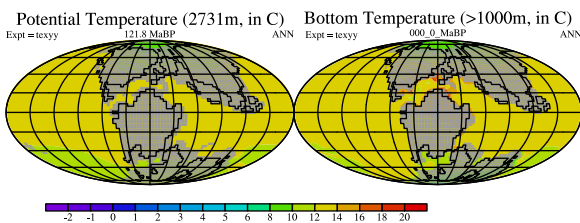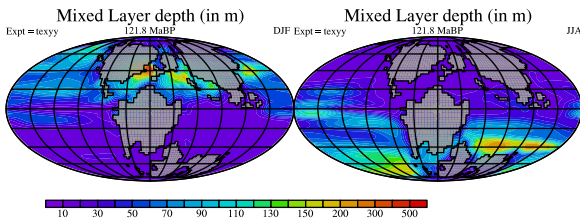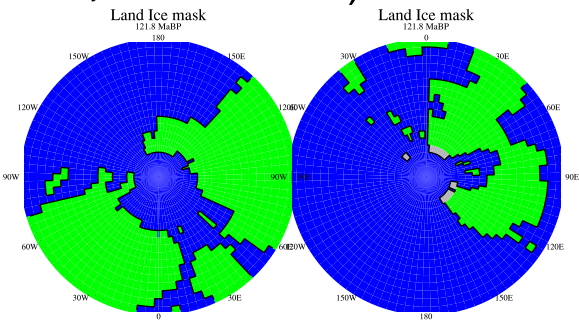

CO<sub>2</sub> = 986 ppmv

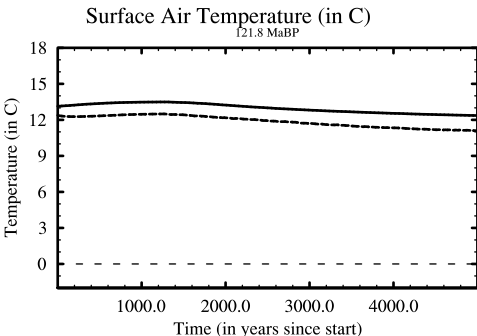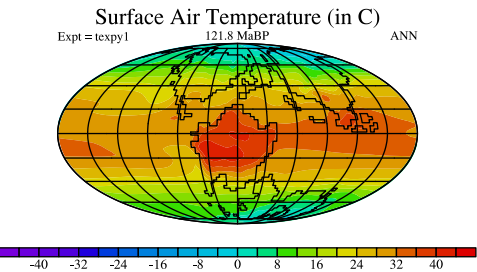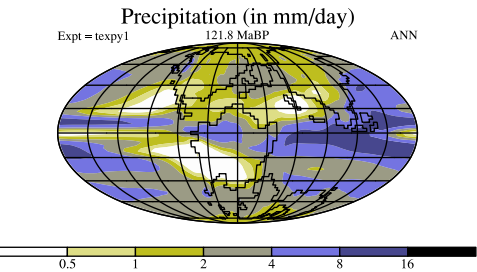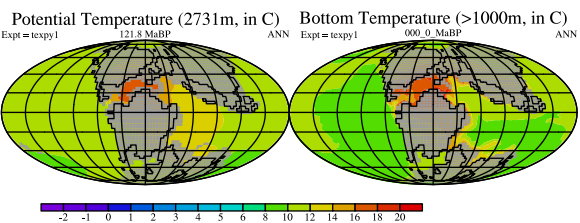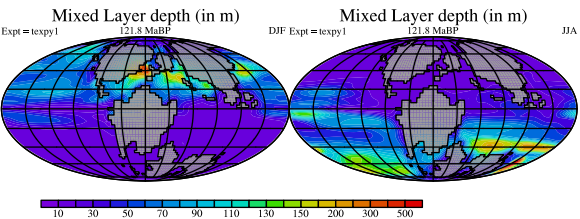

# Early Cretaceous (Barremian, 127.2 Ma)

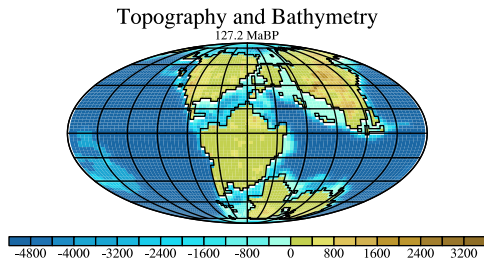

$\text{CO}_2 = 752 \text{ ppmv}$

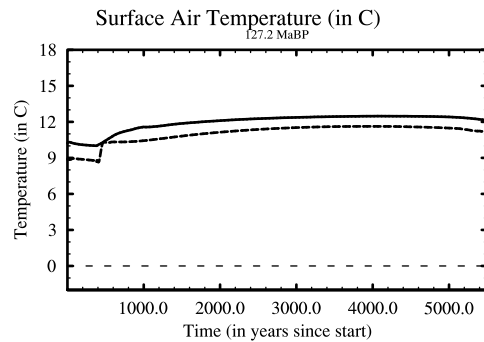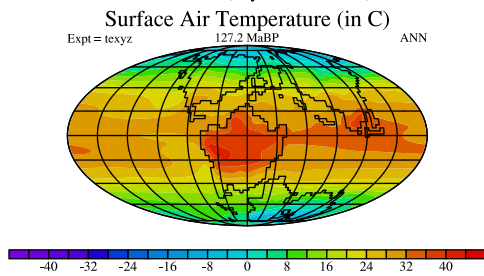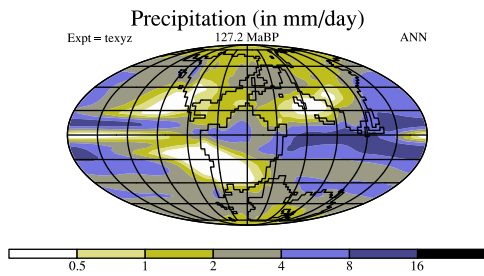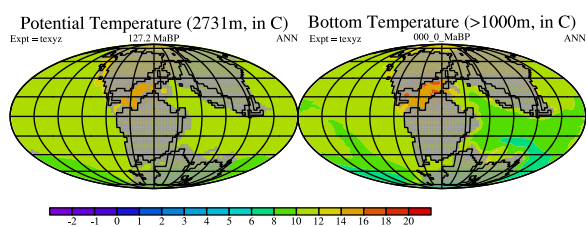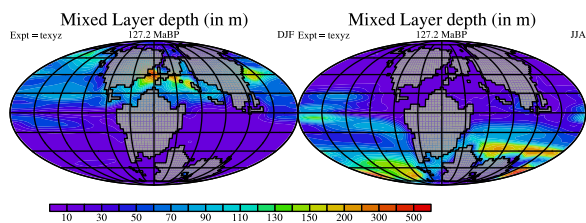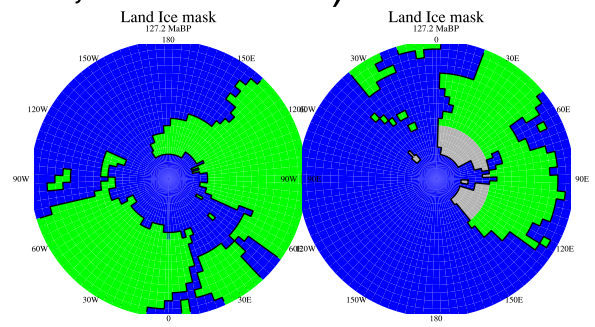

$\text{CO}_2 = 898 \text{ ppmv}$

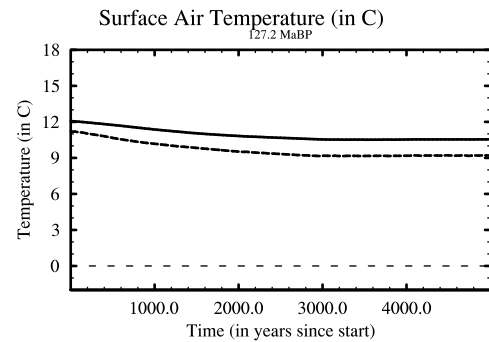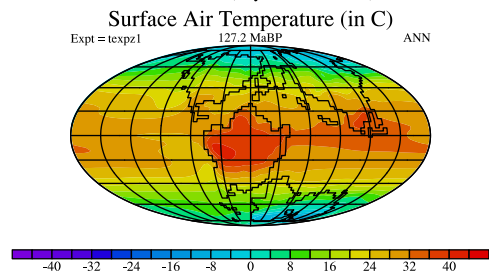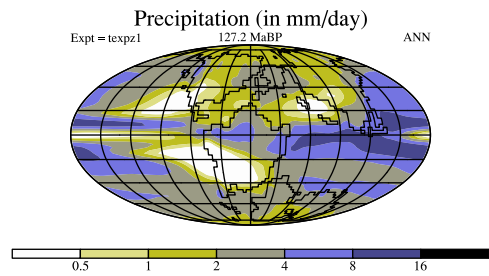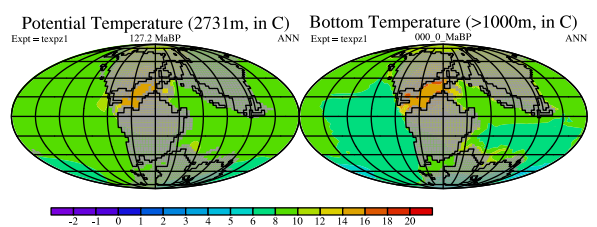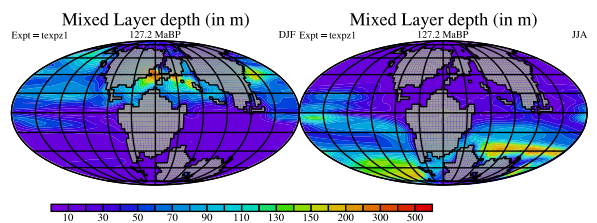



# Early Cretaceous (Hauterivian, 131.2 Ma)

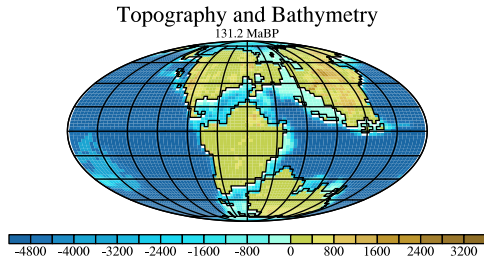

$\text{CO}_2 = 728 \text{ ppmv}$

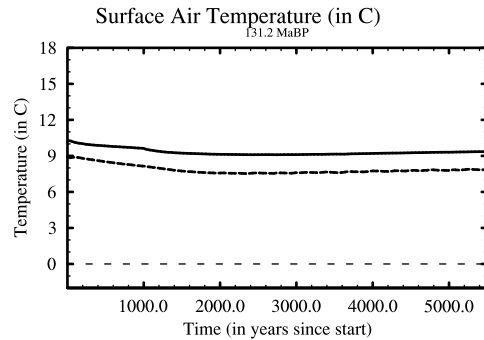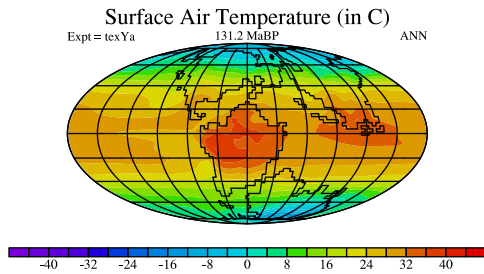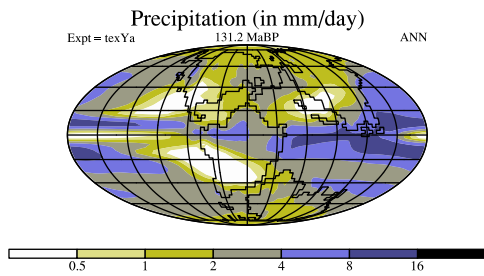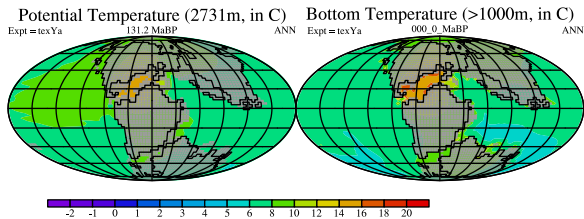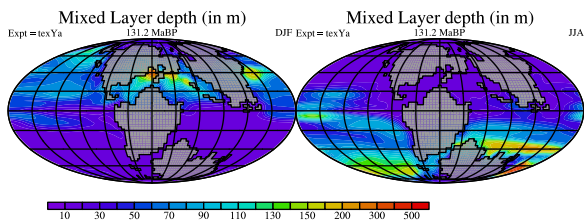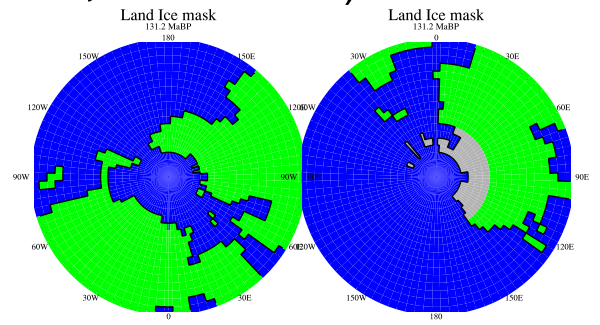

$\text{CO}_2 = 896 \text{ ppmv}$

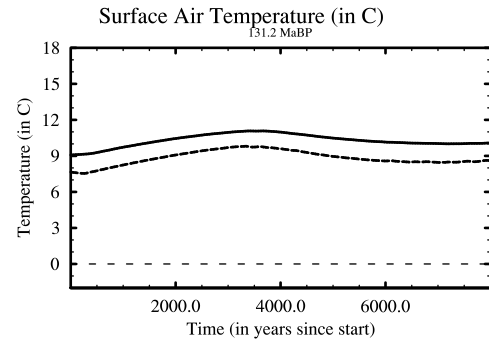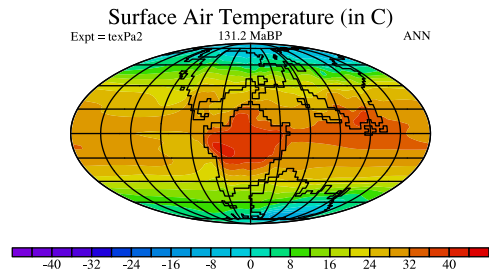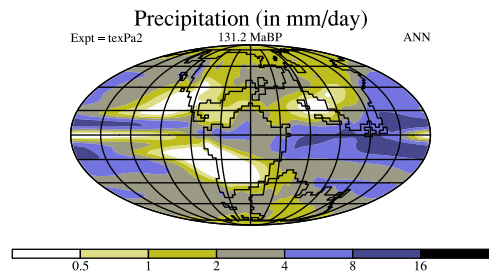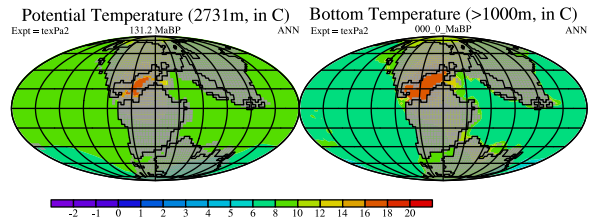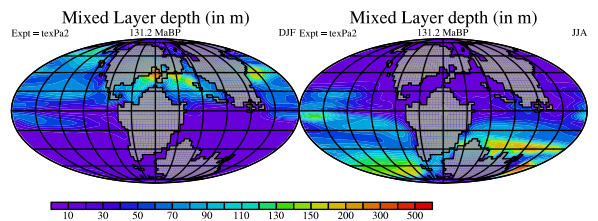

# Early Cretaceous (Valanginian, 136.4 Ma)

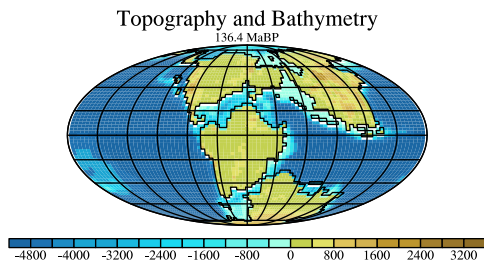

CO<sub>2</sub>= 699 ppmv

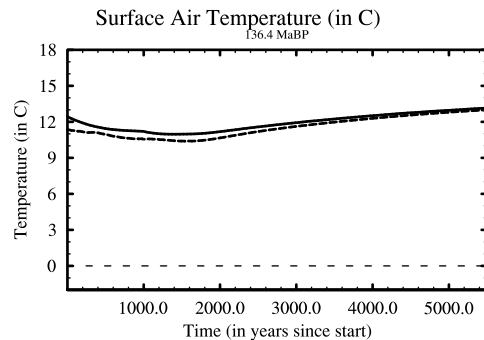

Surface Air Temperature (in C)  
Expt = texYb 136.4 MaBP ANN

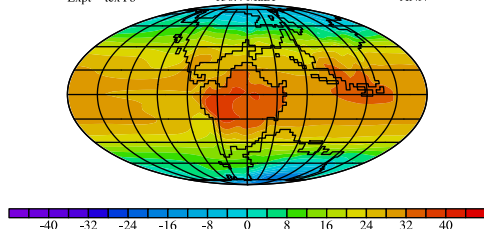

Precipitation (in mm/day)  
Expt = texYb 136.4 MaBP ANN

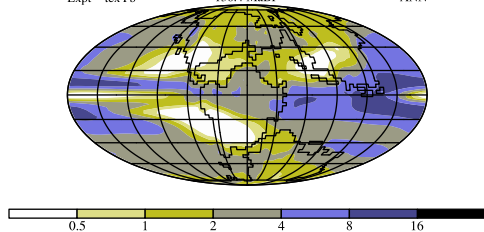

Potential Temperature (2731m, in C) Bottom Temperature (>1000m, in C)  
Expt = texYb 136.4 MaBP ANN Expt = texYb 000.0 MaBP ANN

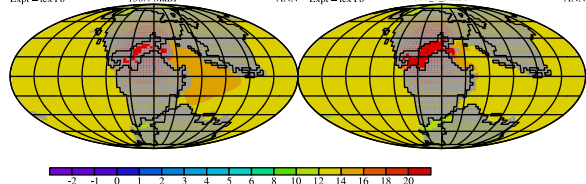

Mixed Layer depth (in m) Mixed Layer depth (in m)  
Expt = texYb 136.4 MaBP DJF Expt = texYb 136.4 MaBP JJA

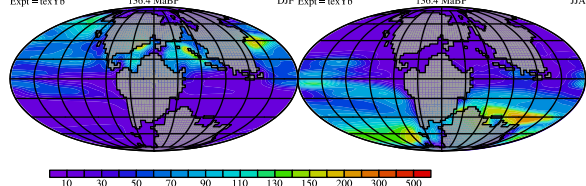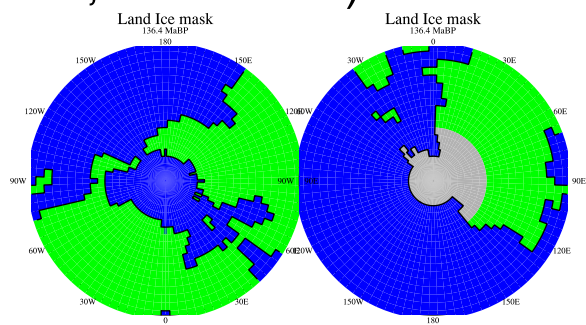

CO<sub>2</sub>= 1020 ppmv

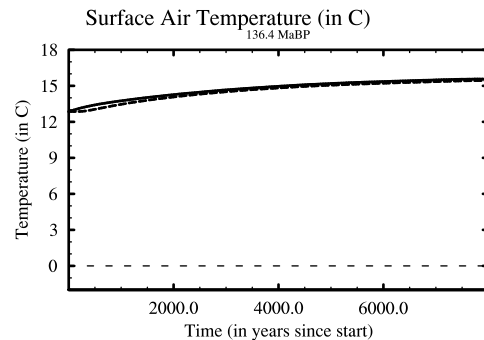

Surface Air Temperature (in C)  
Expt = texPb2 136.4 MaBP ANN

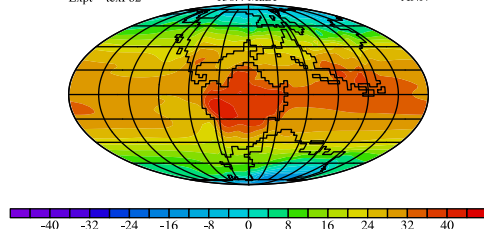

Precipitation (in mm/day)  
Expt = texPb2 136.4 MaBP ANN

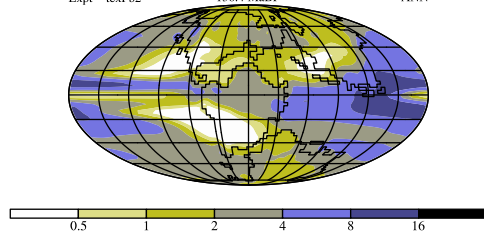

Potential Temperature (2731m, in C) Bottom Temperature (>1000m, in C)  
Expt = texPb2 136.4 MaBP ANN Expt = texPb2 000.0 MaBP ANN

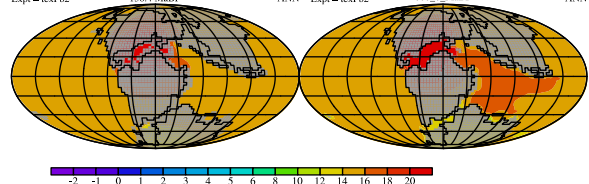

Mixed Layer depth (in m) Mixed Layer depth (in m)  
Expt = texPb2 136.4 MaBP DJF Expt = texPb2 136.4 MaBP JJA

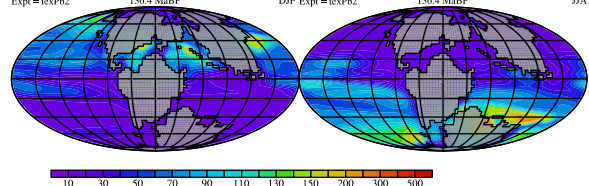

# Early Cretaceous (Berriasian, 142.4 Ma)

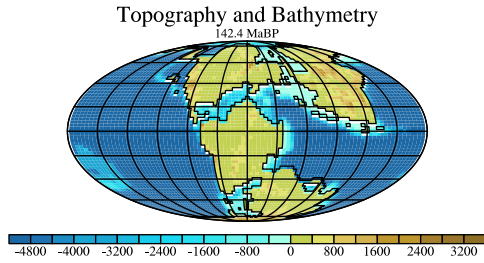

CO<sub>2</sub>= 677 ppmv

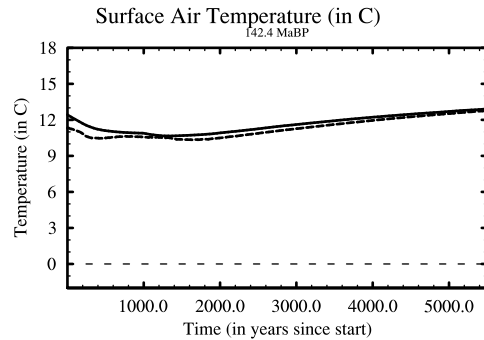

Surface Air Temperature (in C)  
Expt = texYc 142.4 MaBP ANN

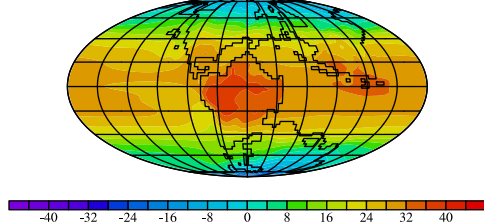

Precipitation (in mm/day)  
Expt = texYc 142.4 MaBP ANN

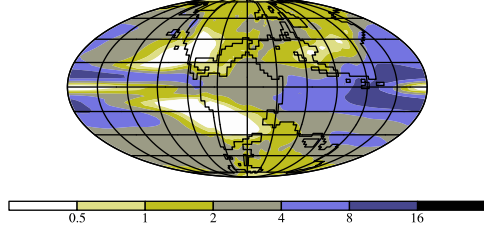

Potential Temperature (2731m, in C) Bottom Temperature (>1000m, in C)  
Expt = texYc 142.4 MaBP ANN Expt = texYc 000.0 MaBP ANN

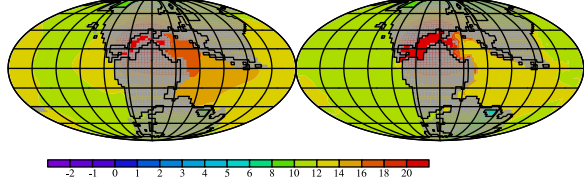

Mixed Layer depth (in m) Mixed Layer depth (in m)  
Expt = texYc 142.4 MaBP DJF Expt = texYc 142.4 MaBP JJA

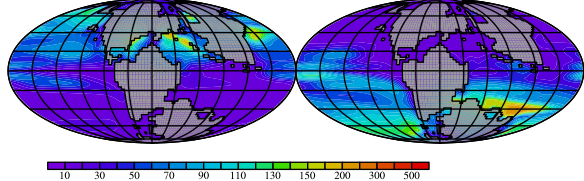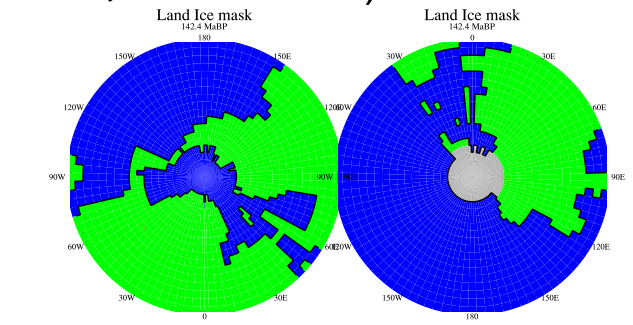

CO<sub>2</sub>= 832 ppmv

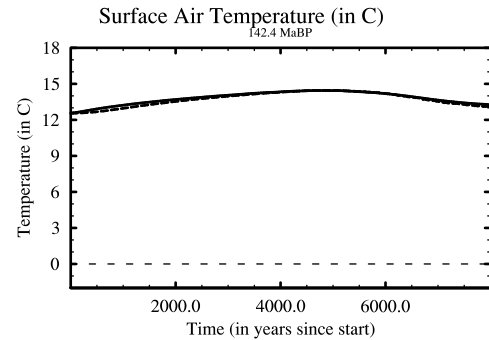

Surface Air Temperature (in C)  
Expt = texPc2 142.4 MaBP ANN

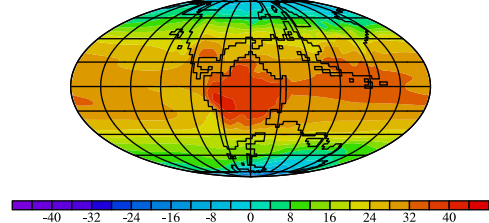

Precipitation (in mm/day)  
Expt = texPc2 142.4 MaBP ANN

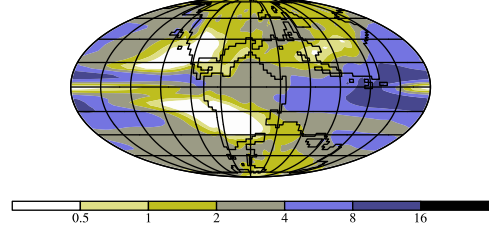

Potential Temperature (2731m, in C) Bottom Temperature (>1000m, in C)  
Expt = texPc2 142.4 MaBP ANN Expt = texPc2 000.0 MaBP ANN

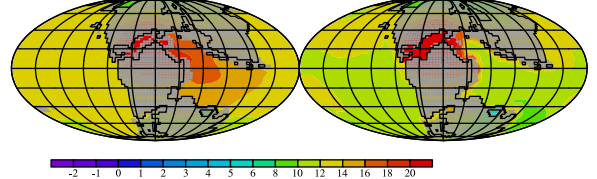

Mixed Layer depth (in m) Mixed Layer depth (in m)  
Expt = texPc2 142.4 MaBP DJF Expt = texPc2 142.4 MaBP JJA

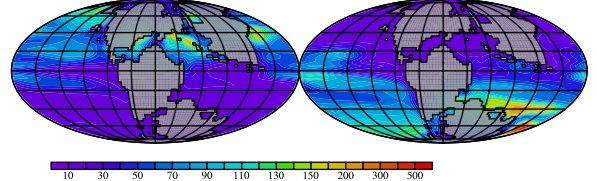



# Jurassic/Cretaceous Boundary (145 Ma)

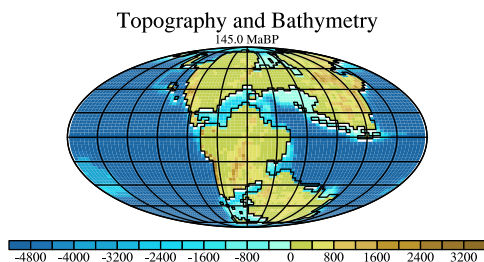

CO<sub>2</sub>= 667 ppmv

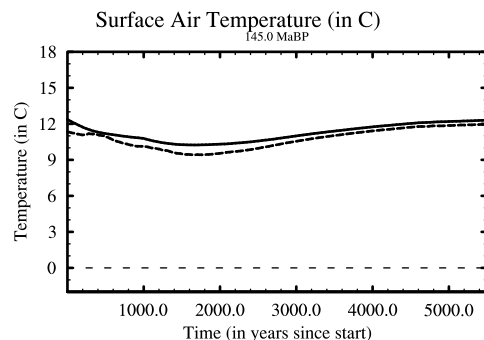

Surface Air Temperature (in C)  
Expt = texYd 145.0 MaBP ANN

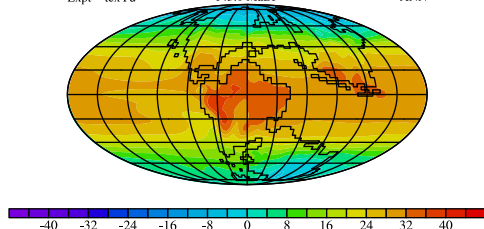

Precipitation (in mm/day)  
Expt = texYd 145.0 MaBP ANN

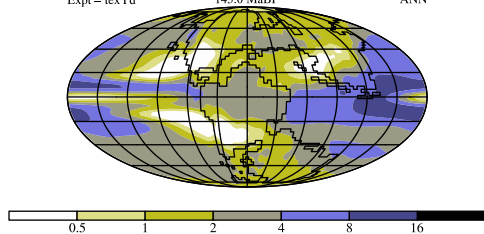

Potential Temperature (2731m, in C) Bottom Temperature (>1000m, in C)  
Expt = texYd 145.0 MaBP ANN Expt = texYd 000.0 MaBP ANN

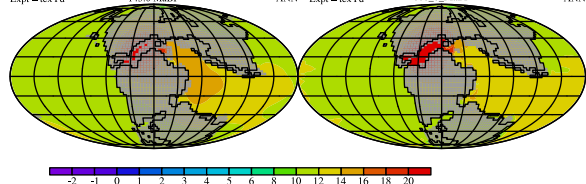

Mixed Layer depth (in m) Mixed Layer depth (in m)  
Expt = texYd 145.0 MaBP DJF Expt = texYd 145.0 MaBP JJA

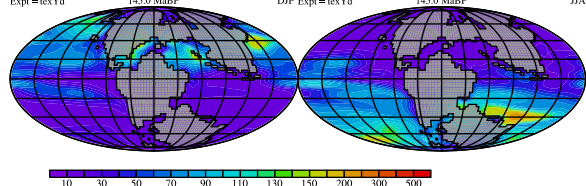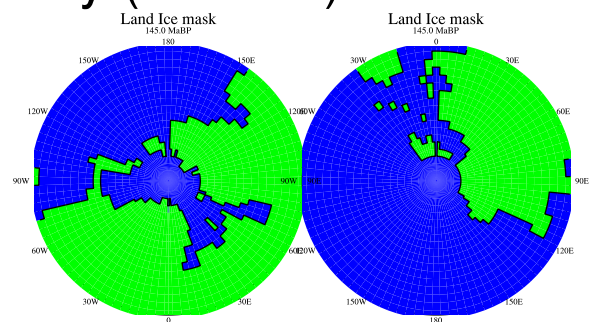

CO<sub>2</sub>= 713 ppmv

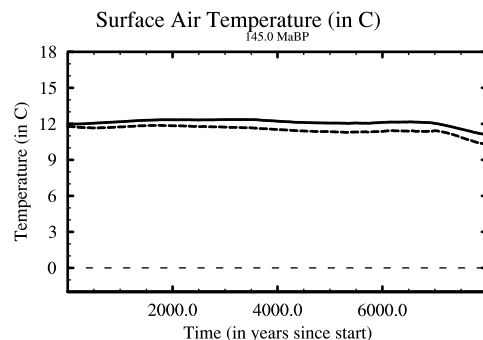

Surface Air Temperature (in C)  
Expt = texPd2 145.0 MaBP ANN

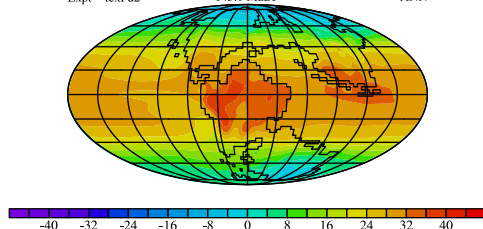

Precipitation (in mm/day)  
Expt = texPd2 145.0 MaBP ANN

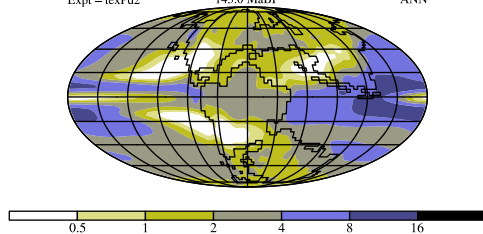

Potential Temperature (2731m, in C) Bottom Temperature (>1000m, in C)  
Expt = texPd2 145.0 MaBP ANN Expt = texPd2 000.0 MaBP ANN

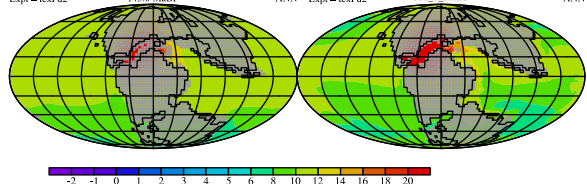

Mixed Layer depth (in m) Mixed Layer depth (in m)  
Expt = texPd2 145.0 MaBP DJF Expt = texPd2 145.0 MaBP JJA

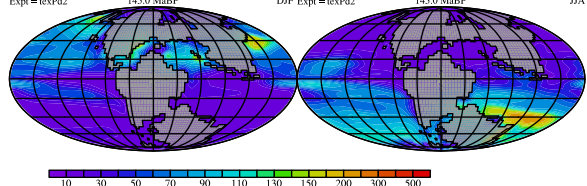

# Late Jurassic (Tithonian, 148.6 Ma)

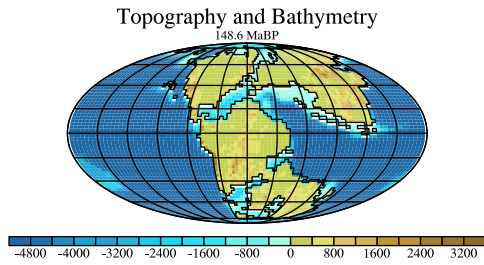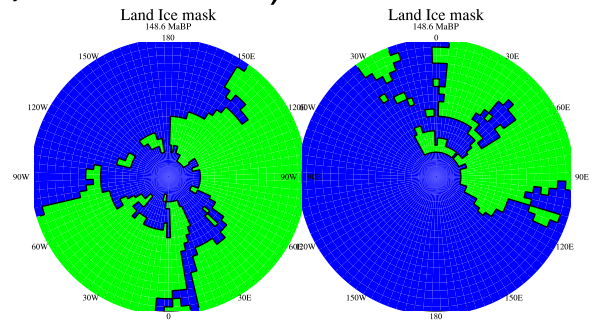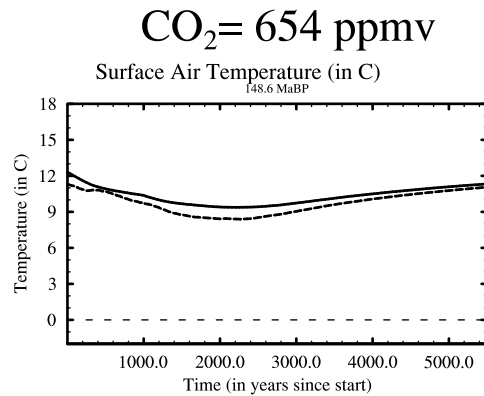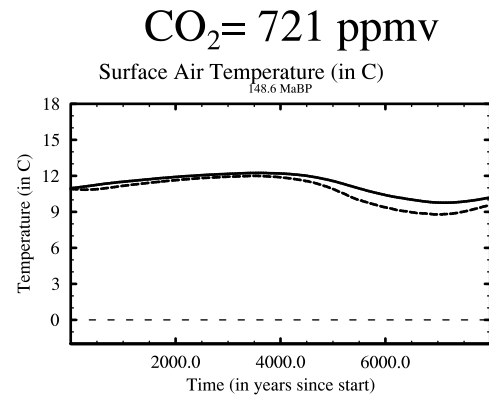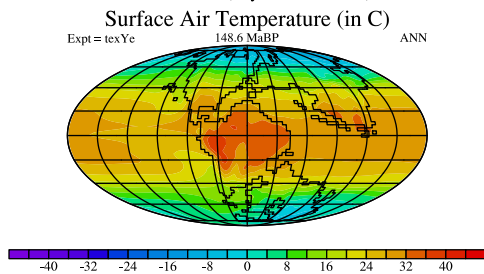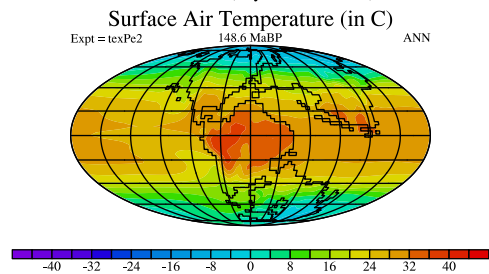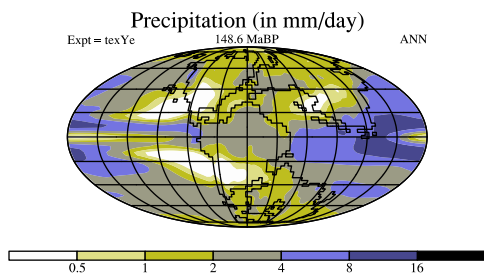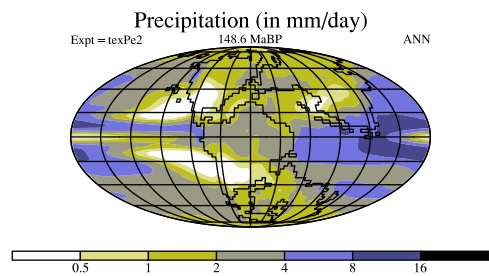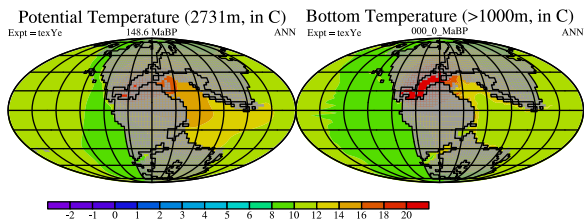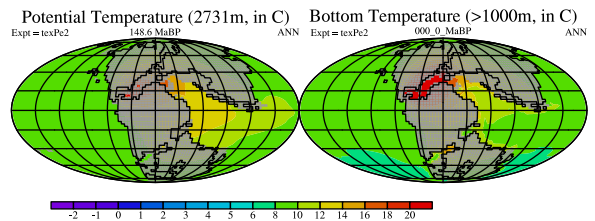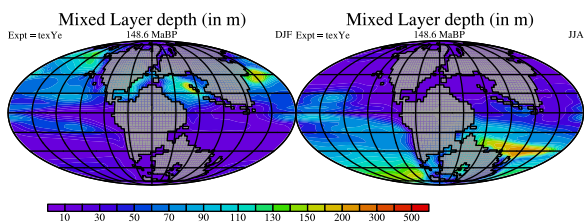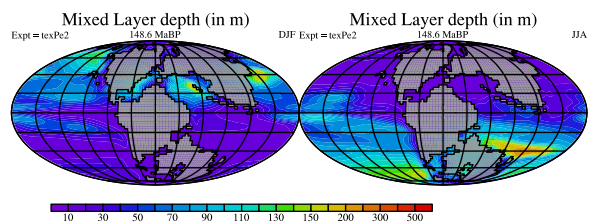



# Late Jurassic (Kimmeridgian, 154.7 Ma)

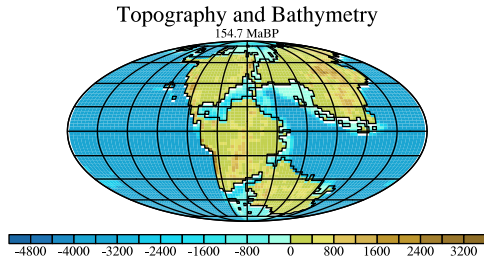

CO<sub>2</sub>= 631 ppmv

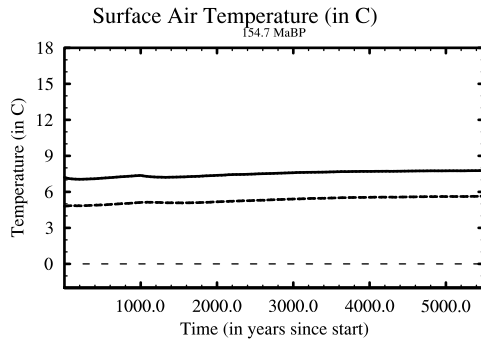

Surface Air Temperature (in C)  
Expt = texYf 154.7 MaBP ANN

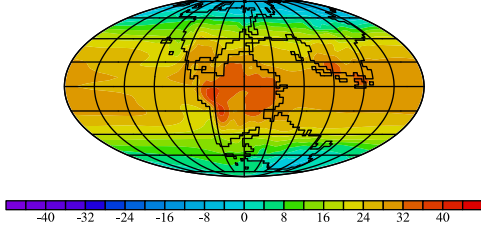

Precipitation (in mm/day)  
Expt = texYf 154.7 MaBP ANN

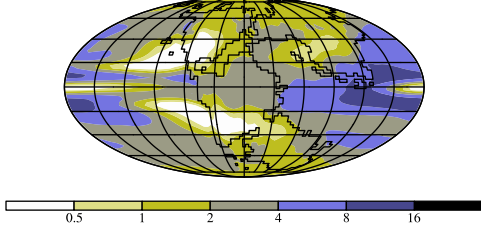

Potential Temperature (2731m, in C) Bottom Temperature (>1000m, in C)  
Expt = texYf 154.7 MaBP ANN Expt = texYf 000.0 MaBP ANN

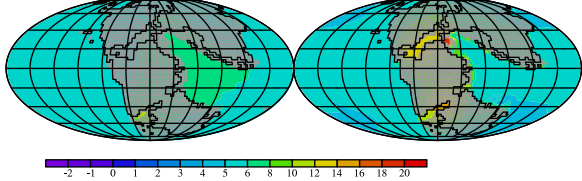

Mixed Layer depth (in m) Mixed Layer depth (in m)  
Expt = texYf 154.7 MaBP DJF Expt = texYf 154.7 MaBP JJA

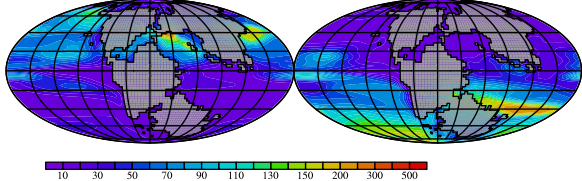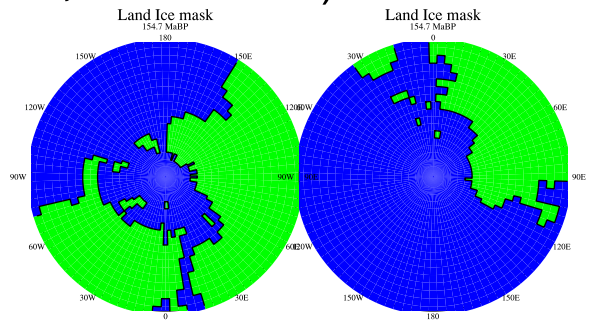

CO<sub>2</sub>= 802 ppmv

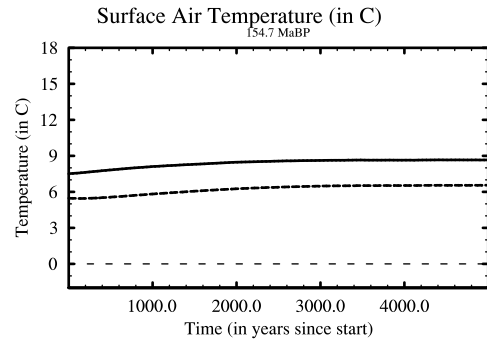

Surface Air Temperature (in C)  
Expt = texPf1 154.7 MaBP ANN

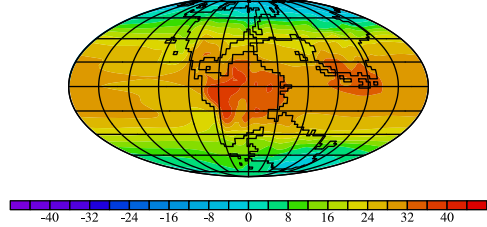

Precipitation (in mm/day)  
Expt = texPf1 154.7 MaBP ANN

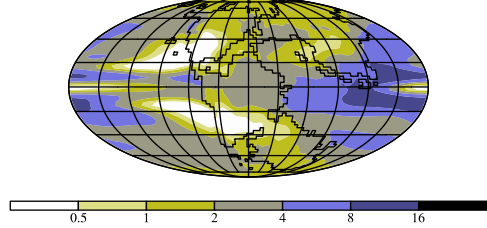

Potential Temperature (2731m, in C) Bottom Temperature (>1000m, in C)  
Expt = texPf1 154.7 MaBP ANN Expt = texPf1 000.0 MaBP ANN

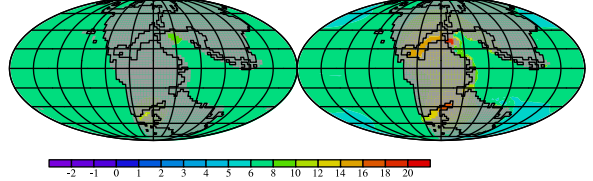

Mixed Layer depth (in m) Mixed Layer depth (in m)  
Expt = texPf1 154.7 MaBP DJF Expt = texPf1 154.7 MaBP JJA

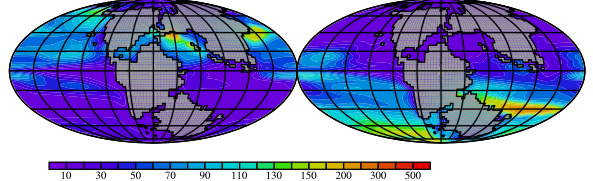

# Late Jurassic (Oxfordian, 160.4 Ma)

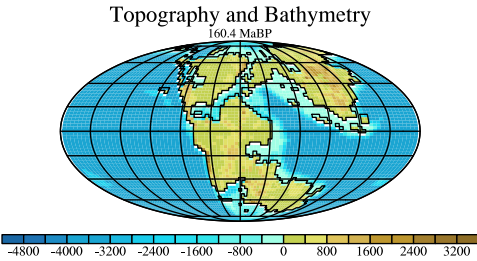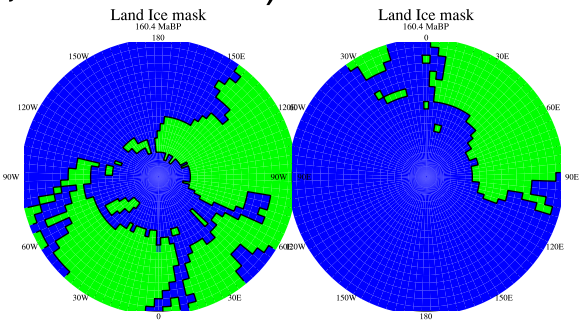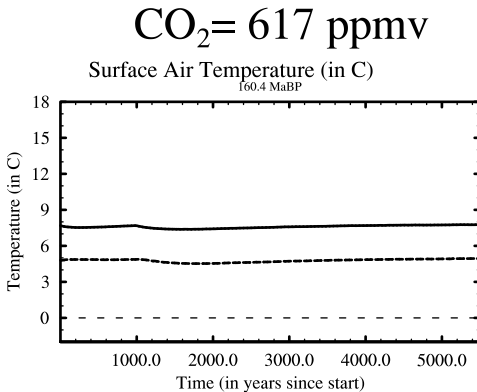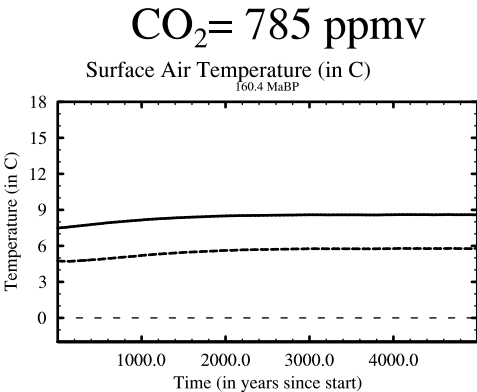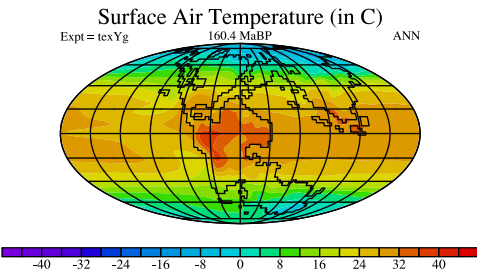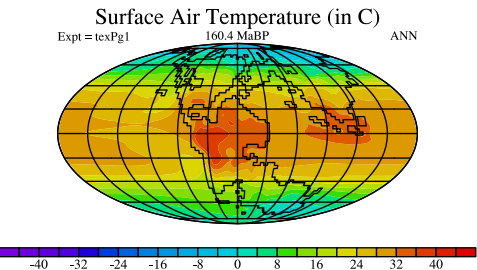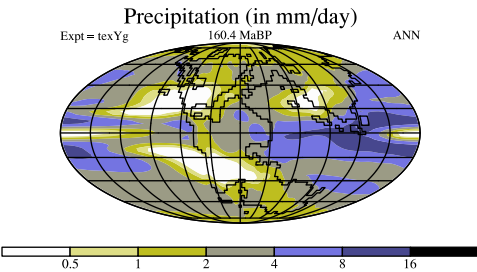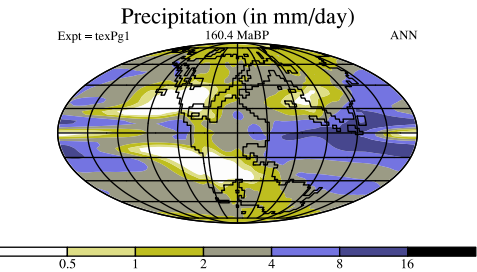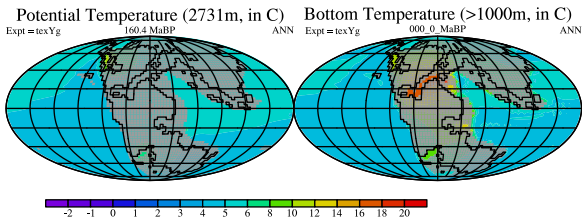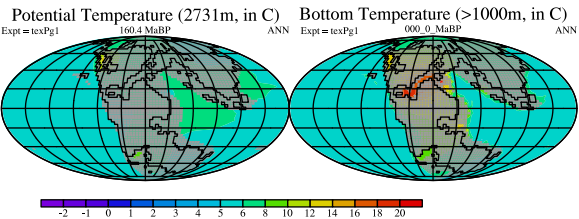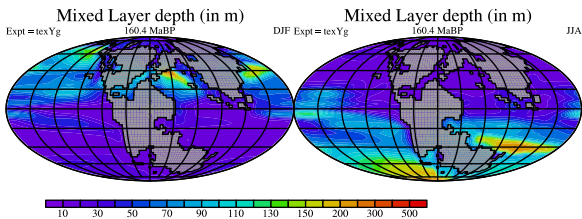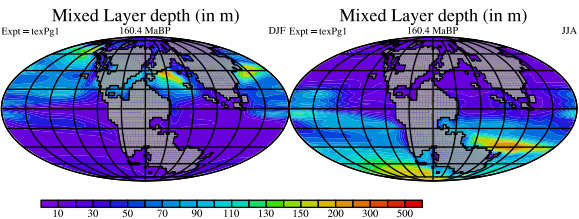

# Middle Jurassic (Callovian, 164.8 Ma)

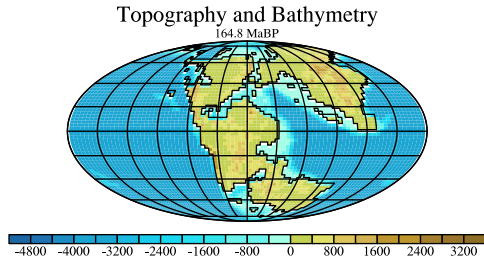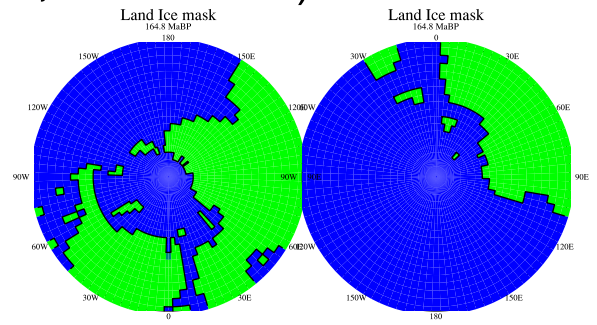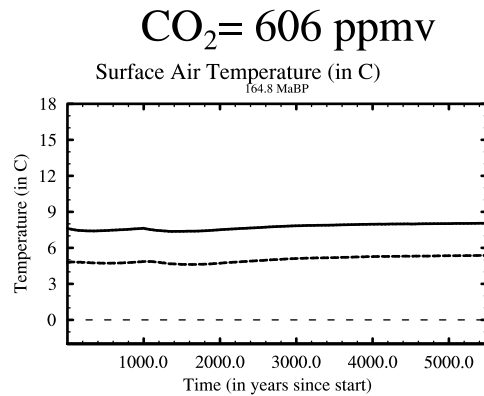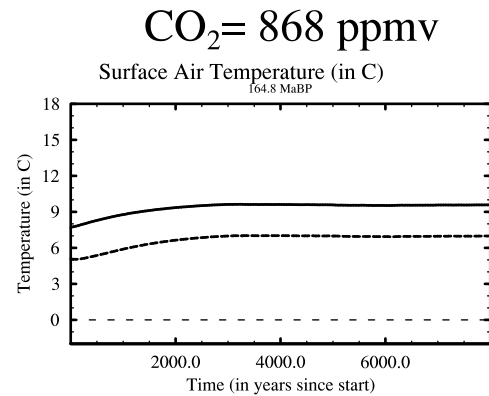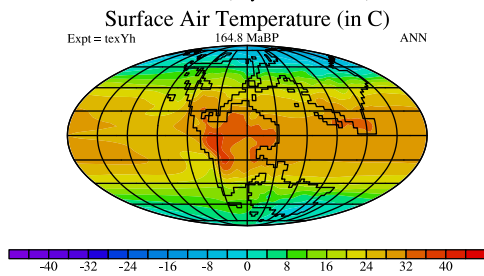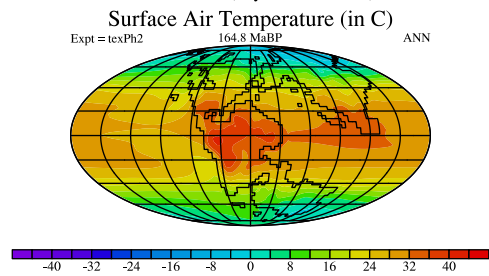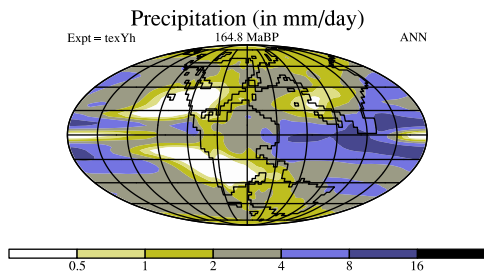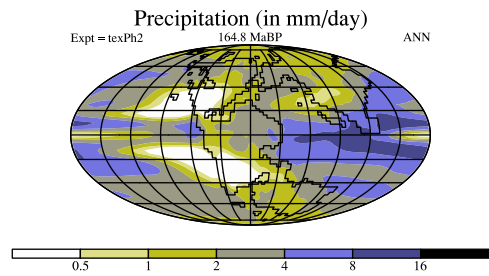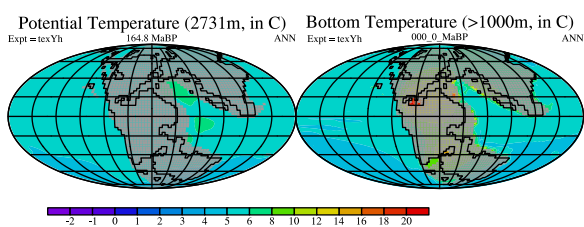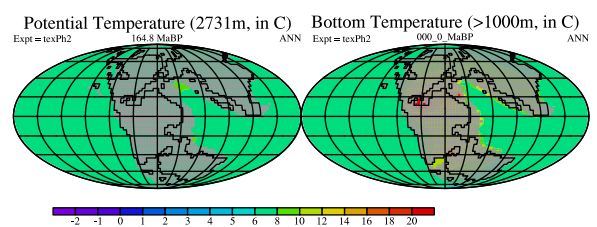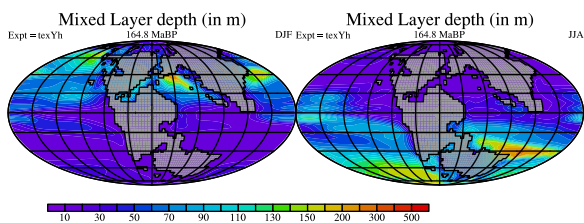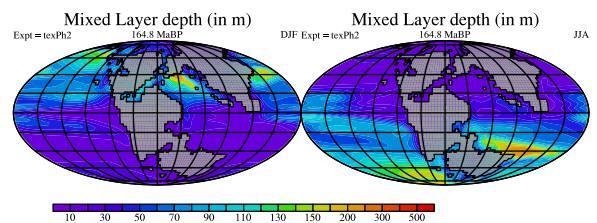



# Middle Jurassic (Bajocian&Bathonian, 168.2)

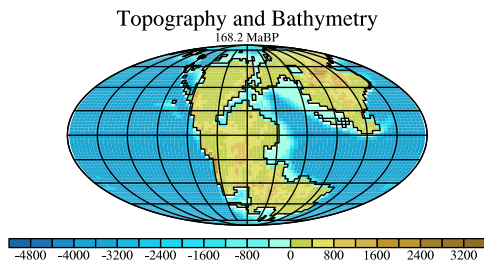

CO<sub>2</sub>= 596 ppmv

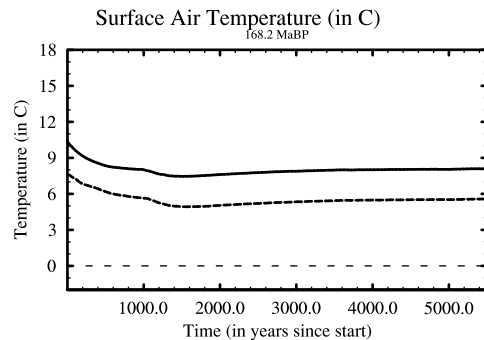

Surface Air Temperature (in C)  
Expt = texYi 168.2 MaBP ANN

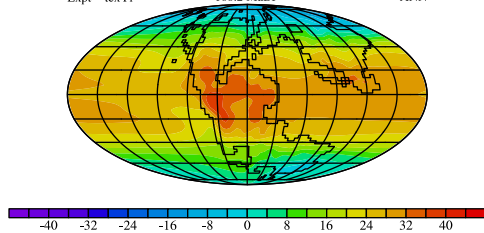

Precipitation (in mm/day)  
Expt = texYi 168.2 MaBP ANN

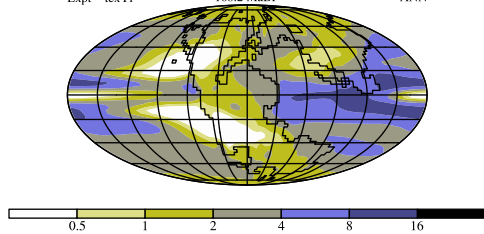

Potential Temperature (2731m, in C) Bottom Temperature (>1000m, in C)  
Expt = texYi 168.2 MaBP ANN Expt = texYi 000.0 MaBP ANN

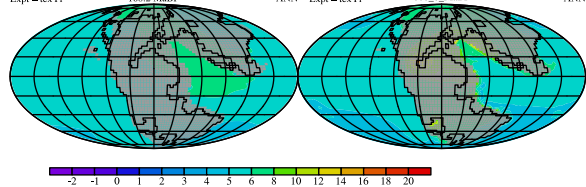

Mixed Layer depth (in m) Mixed Layer depth (in m)  
Expt = texYi 168.2 MaBP DJF Expt = texYi 168.2 MaBP JJA

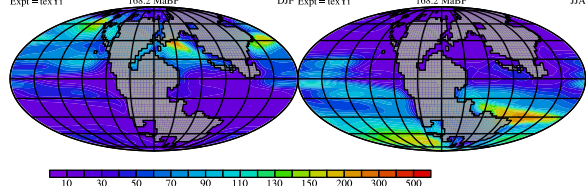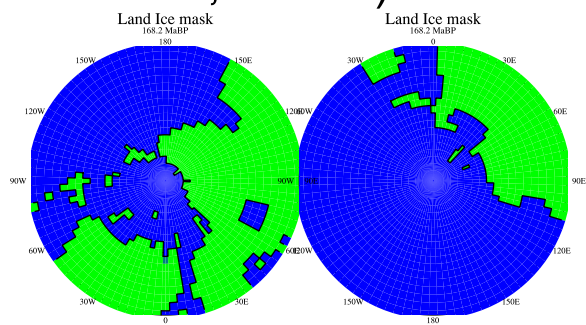

CO<sub>2</sub>= 1019 ppmv

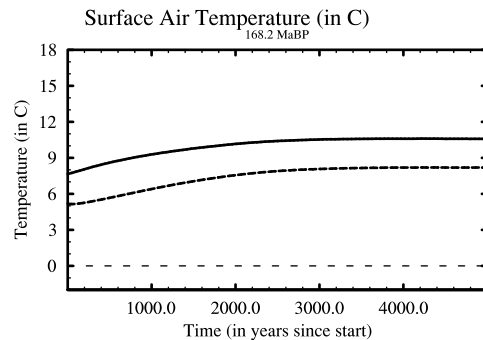

Surface Air Temperature (in C)  
Expt = texP1i 168.2 MaBP ANN

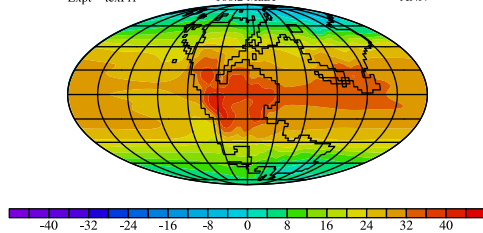

Precipitation (in mm/day)  
Expt = texP1i 168.2 MaBP ANN

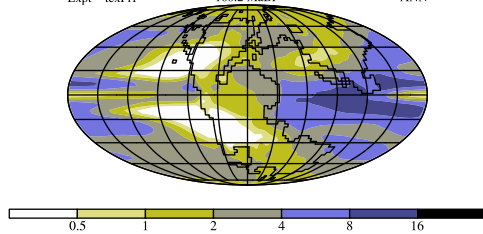

Potential Temperature (2731m, in C) Bottom Temperature (>1000m, in C)  
Expt = texP1i 168.2 MaBP ANN Expt = texP1i 000.0 MaBP ANN

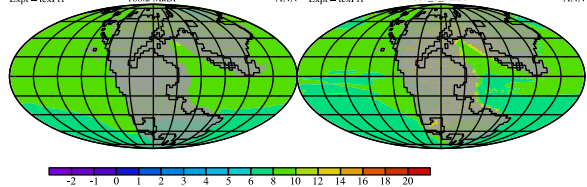

Mixed Layer depth (in m) Mixed Layer depth (in m)  
Expt = texP1i 168.2 MaBP DJF Expt = texP1i 168.2 MaBP JJA

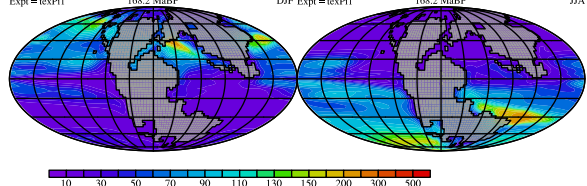

# Middle Jurassic (Aalenian, 172.2 Ma)

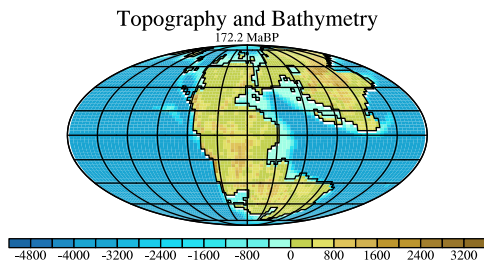

CO<sub>2</sub> = 581 ppmv

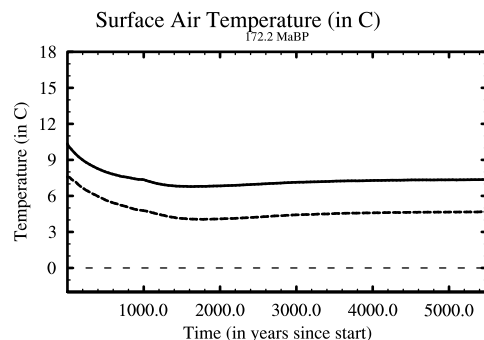

Surface Air Temperature (in C)  
Expt = texYj 172.2 MaBP ANN

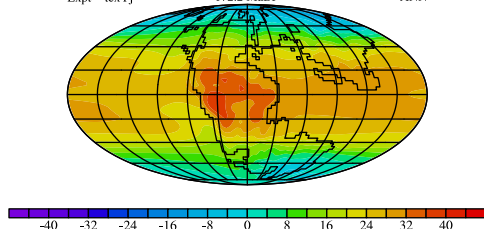

Precipitation (in mm/day)  
Expt = texYj 172.2 MaBP ANN

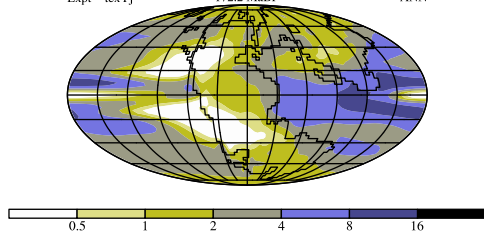

Potential Temperature (2731m, in C) Bottom Temperature (>1000m, in C)  
Expt = texYj 172.2 MaBP ANN Expt = texYj 000.0 MaBP ANN

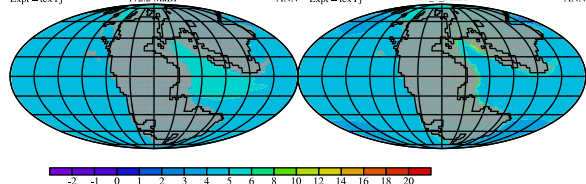

Mixed Layer depth (in m) DIF Expt = texYj 172.2 MaBP ANN JJA

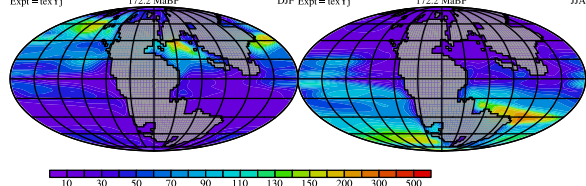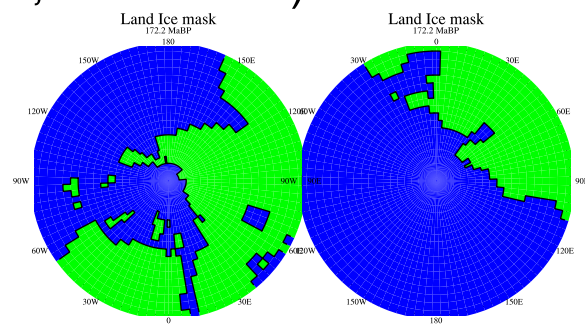

CO<sub>2</sub> = 1046 ppmv

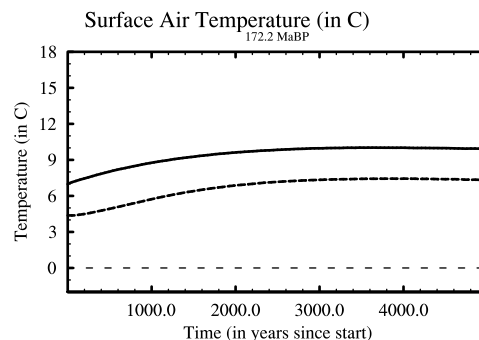

Surface Air Temperature (in C)  
Expt = texPj1 172.2 MaBP ANN

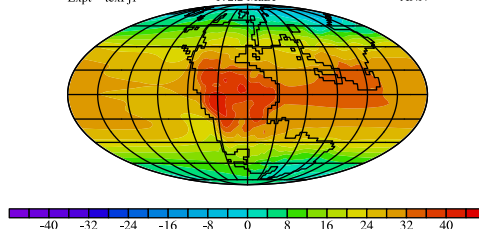

Precipitation (in mm/day)  
Expt = texPj1 172.2 MaBP ANN

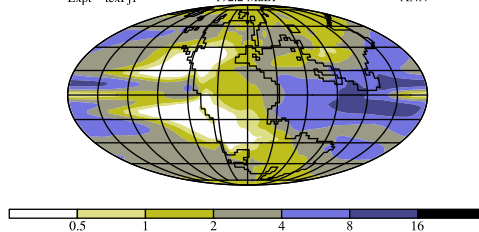

Potential Temperature (2731m, in C) Bottom Temperature (>1000m, in C)  
Expt = texPj1 172.2 MaBP ANN Expt = texPj1 000.0 MaBP ANN

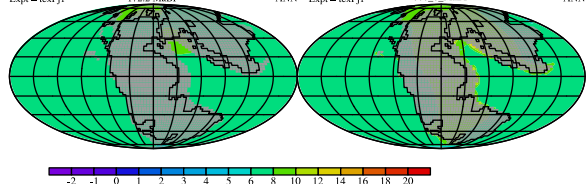

Mixed Layer depth (in m) DIF Expt = texPj1 172.2 MaBP ANN JJA

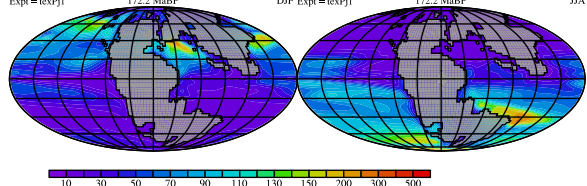

# Early Jurassic (Toarcian, 178.4 Ma)

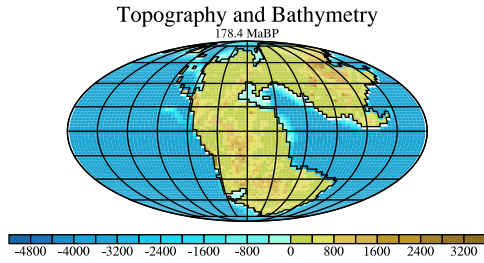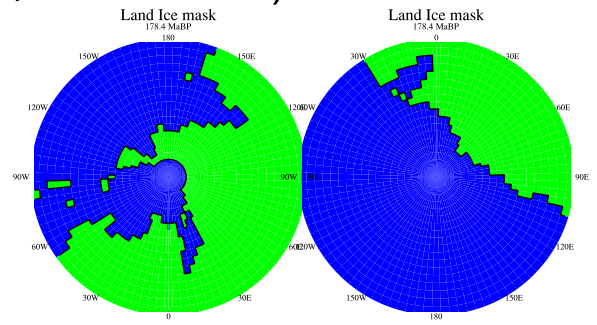

CO<sub>2</sub>= 560 ppmv

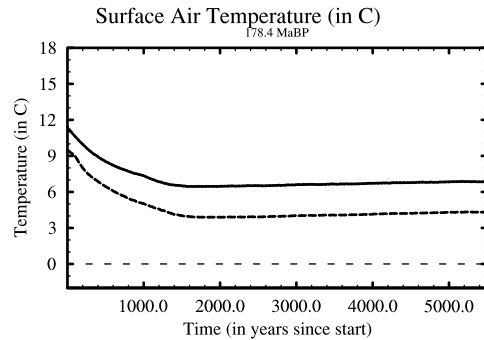

CO<sub>2</sub>= 986 ppmv

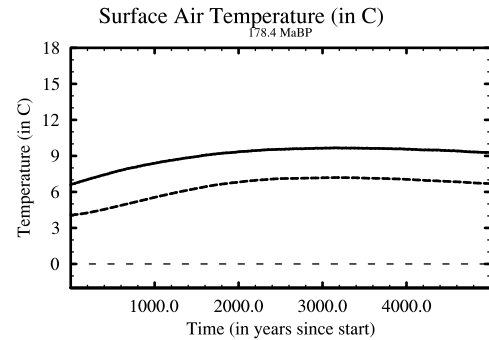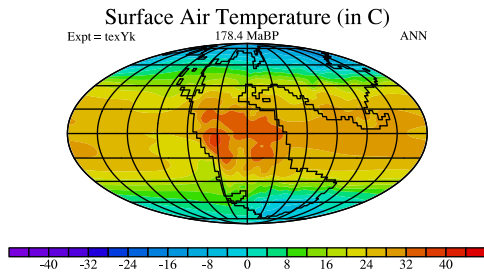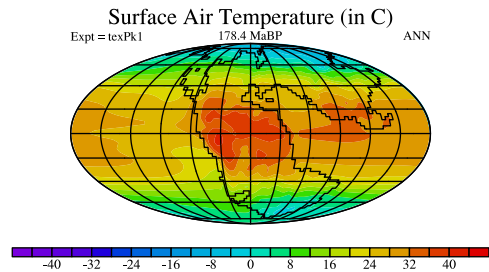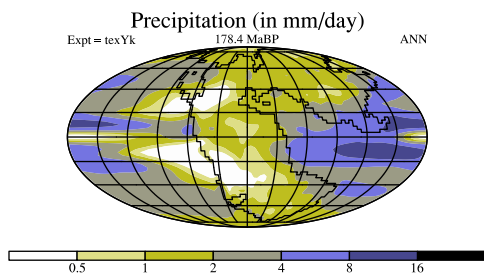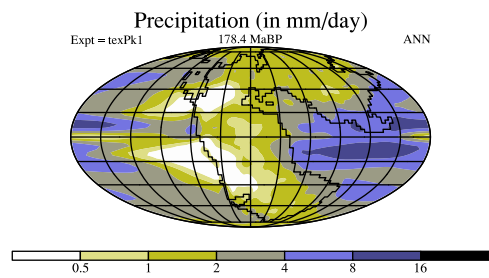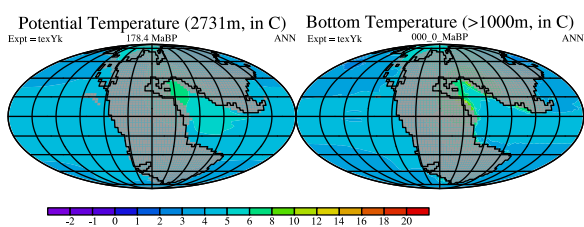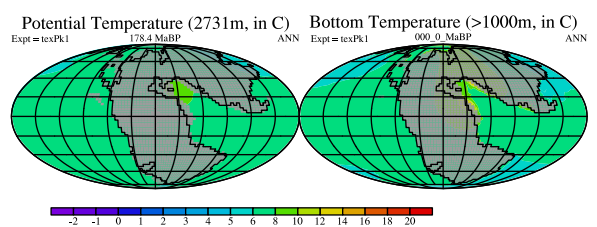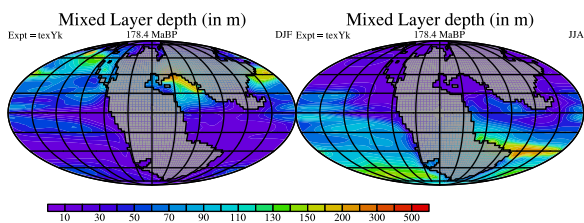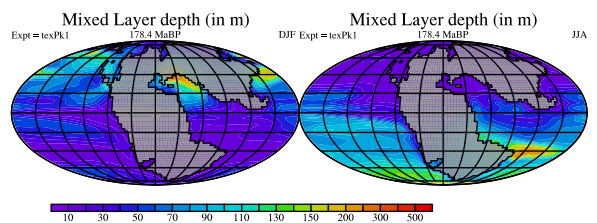



# Early Jurassic (Pliensbachian, 186.8 Ma)

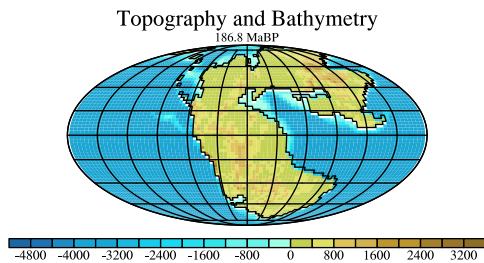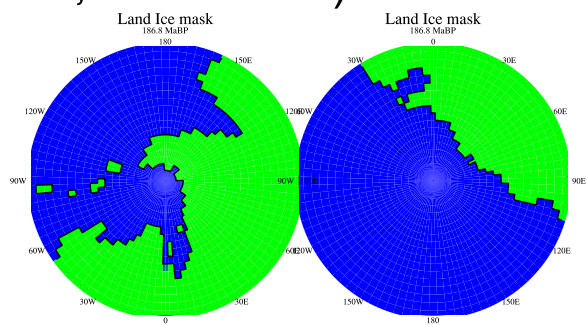

CO<sub>2</sub>= 560 ppmv

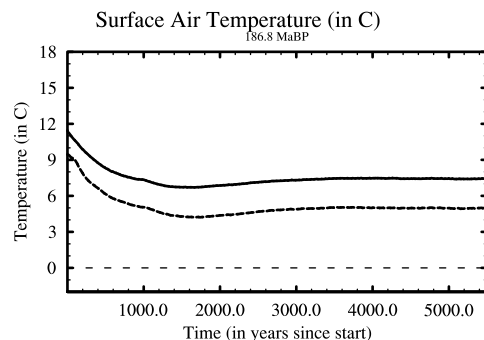

CO<sub>2</sub>= 949 ppmv

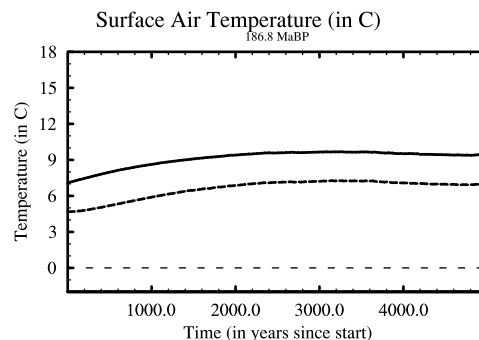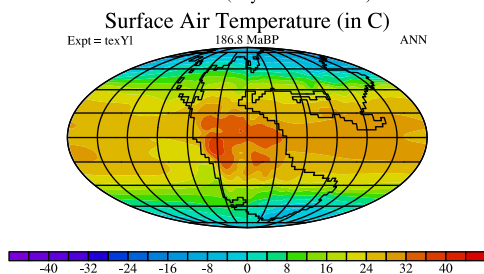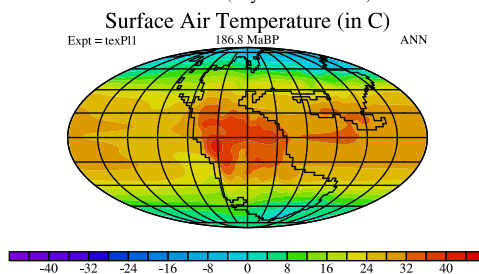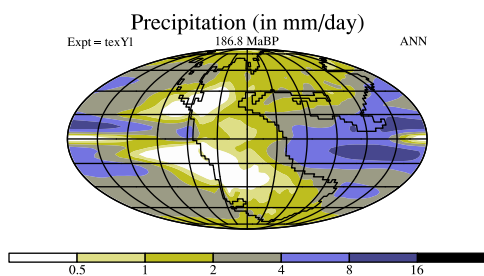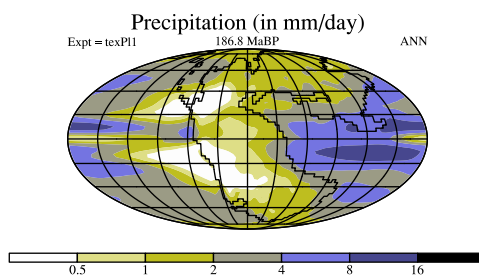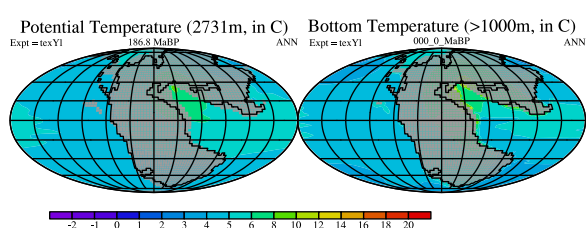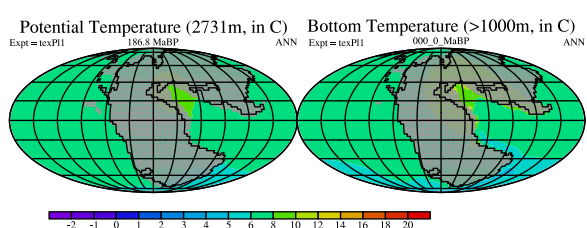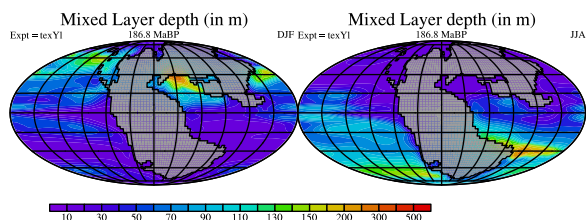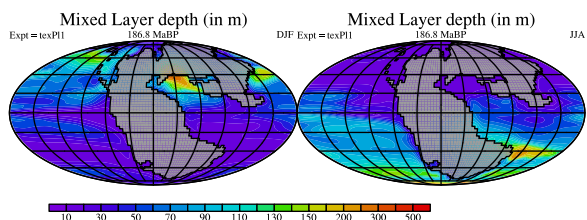

# Early Jurassic (Sinemurian/Pliensbachian, 190.8 Ma)

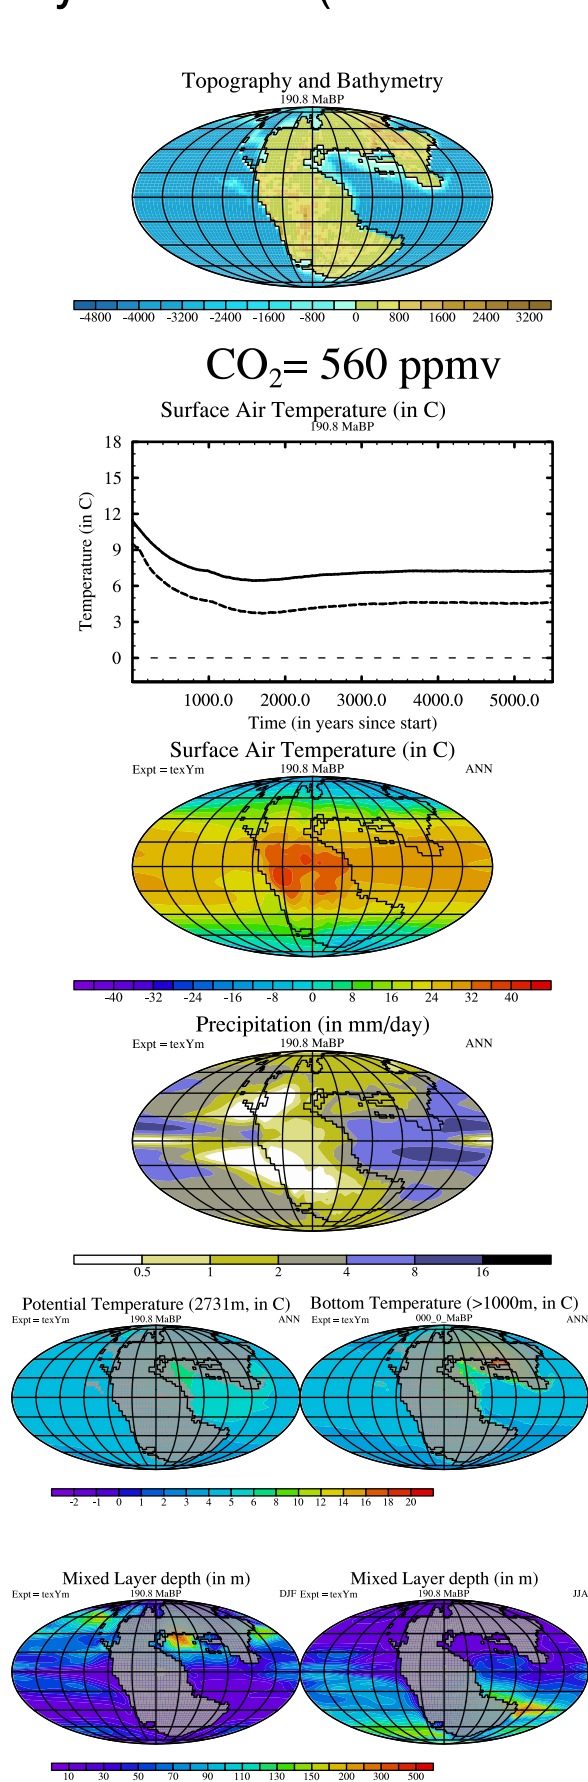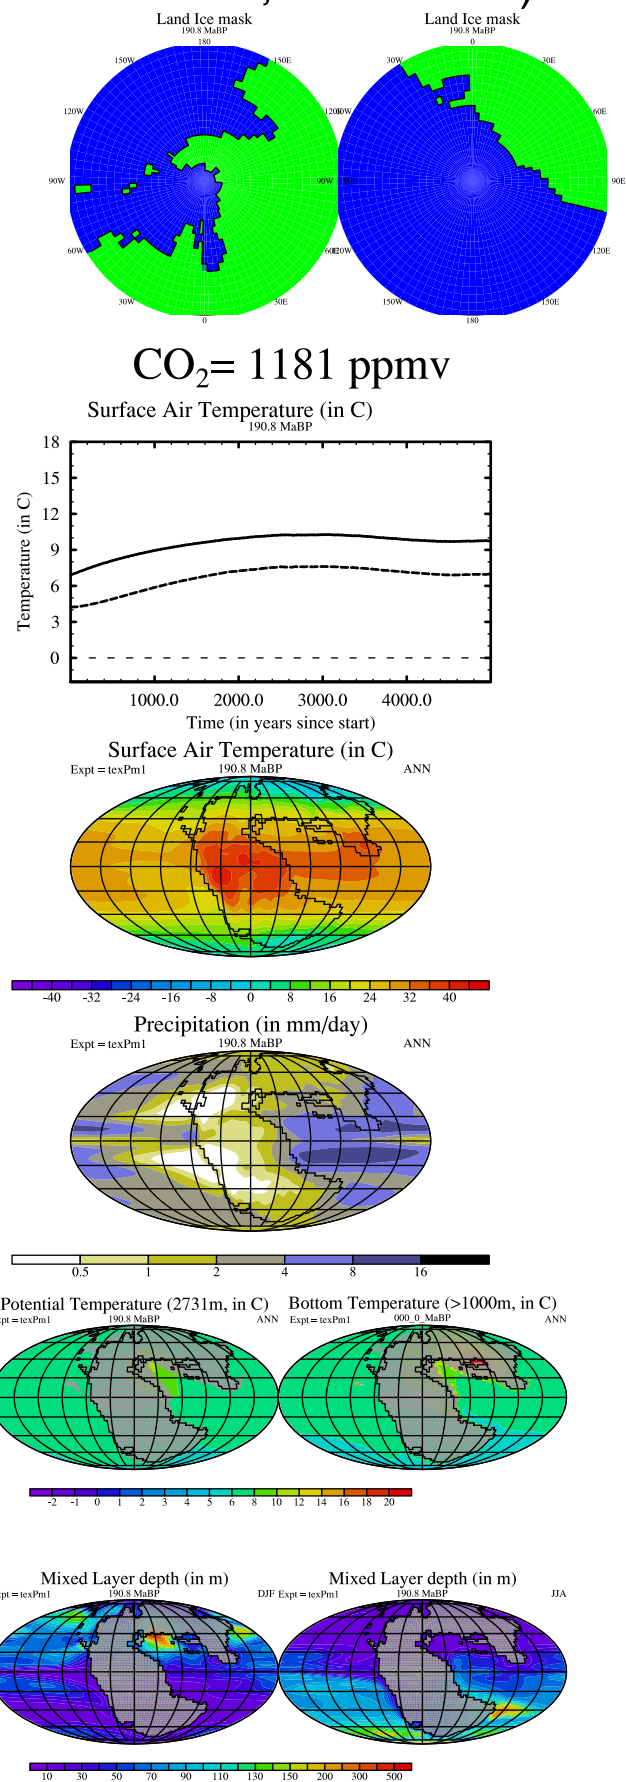

# Early Jurassic (Hettangian&Sinemurian, 196 Ma)

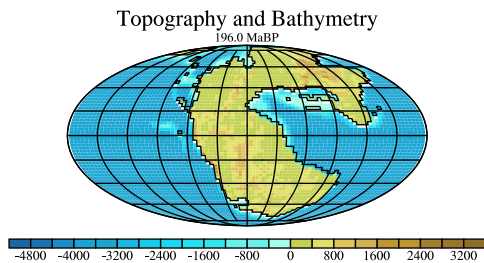

CO<sub>2</sub>= 560 ppmv

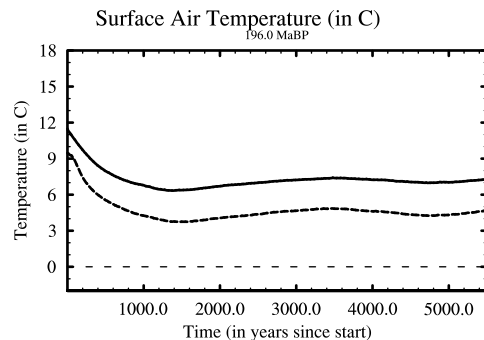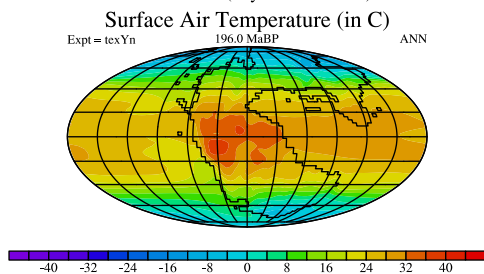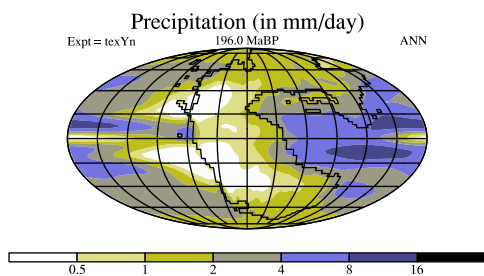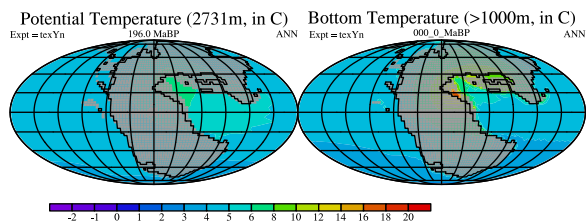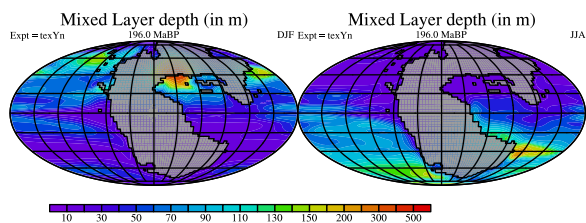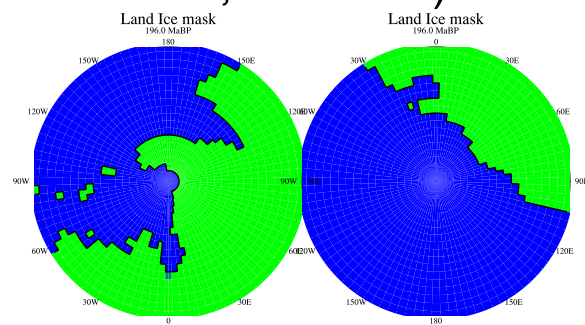

CO<sub>2</sub>= 1784 ppmv

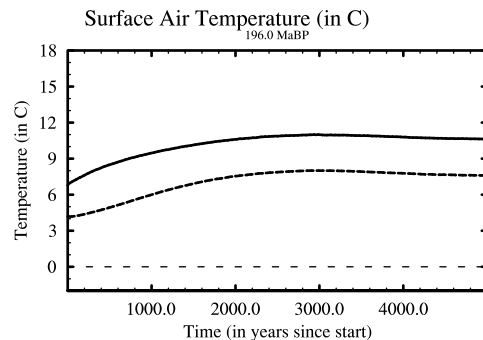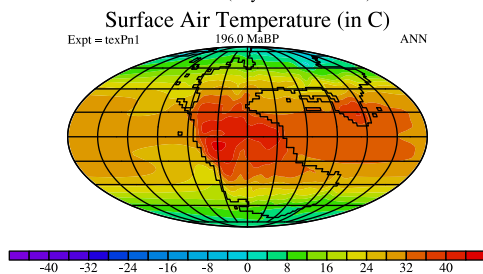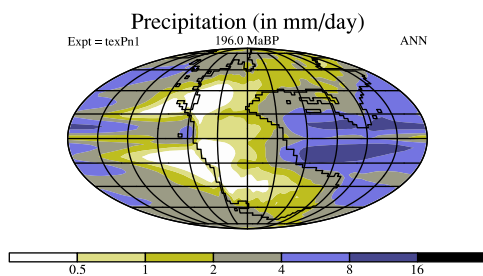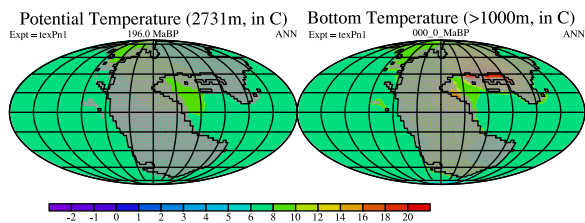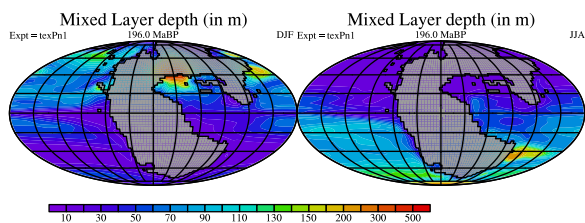



# Late Triassic (Rhaetian/Hettangian, 201.3 Ma)

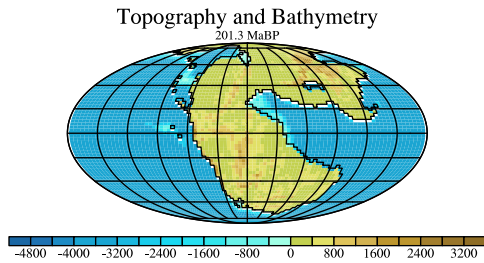

CO<sub>2</sub>= 560 ppmv

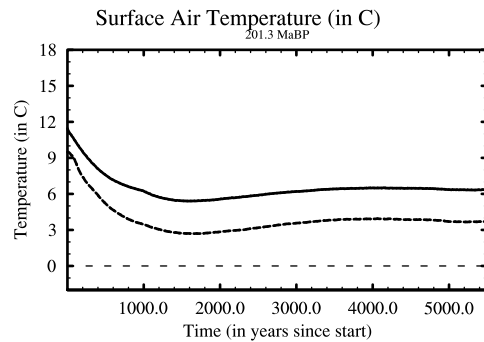

Surface Air Temperature (in C)  
Expt = texYo 201.3 MaBP ANN

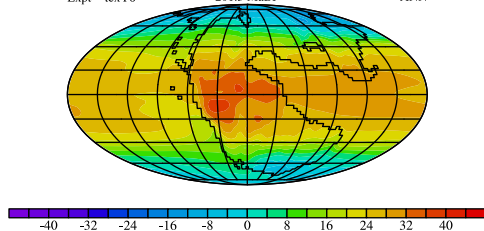

Precipitation (in mm/day)  
Expt = texYo 201.3 MaBP ANN

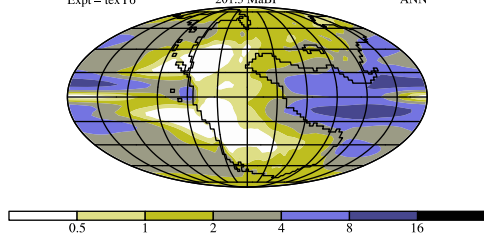

Potential Temperature (2731m, in C) Bottom Temperature (>1000m, in C)  
Expt = texYo 201.3 MaBP ANN Expt = texYo 000.0 MaBP ANN

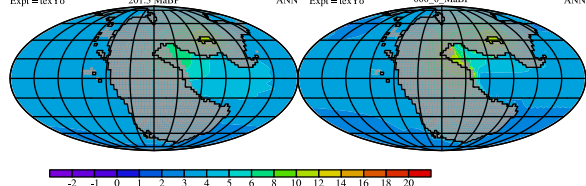

Mixed Layer depth (in m) Mixed Layer depth (in m)  
Expt = texYo 201.3 MaBP DJF Expt = texYo 201.3 MaBP JJA

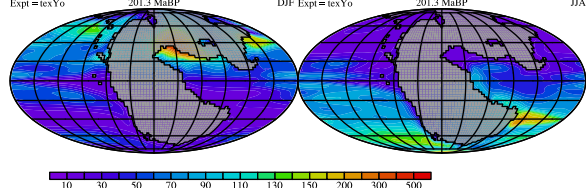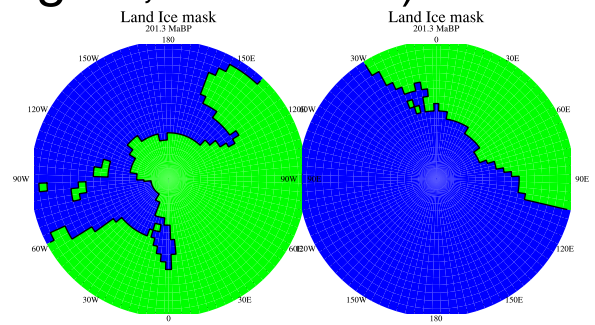

CO<sub>2</sub>= 1729 ppmv

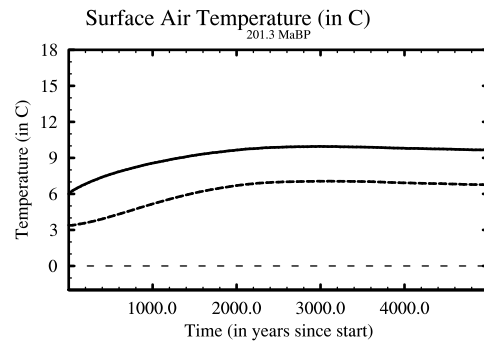

Surface Air Temperature (in C)  
Expt = texPo1 201.3 MaBP ANN

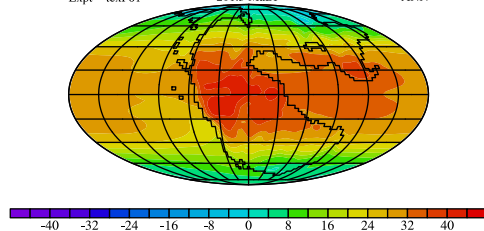

Precipitation (in mm/day)  
Expt = texPo1 201.3 MaBP ANN

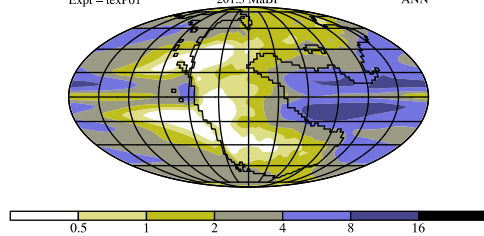

Potential Temperature (2731m, in C) Bottom Temperature (>1000m, in C)  
Expt = texPo1 201.3 MaBP ANN Expt = texPo1 000.0 MaBP ANN

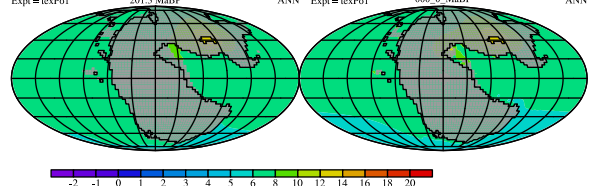

Mixed Layer depth (in m) Mixed Layer depth (in m)  
Expt = texPo1 201.3 MaBP DJF Expt = texPo1 201.3 MaBP JJA

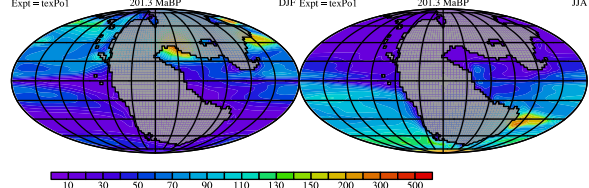

# Late Triassic (Rhaetian, 204.9 Ma)

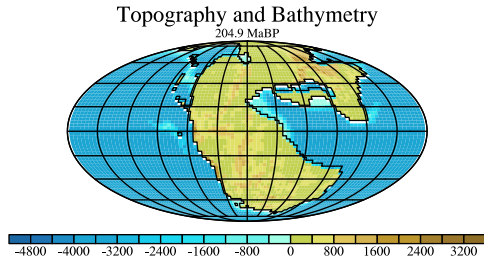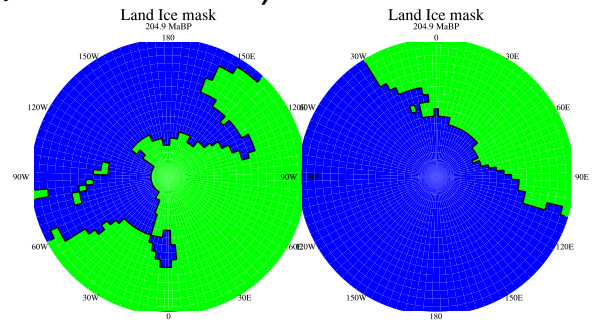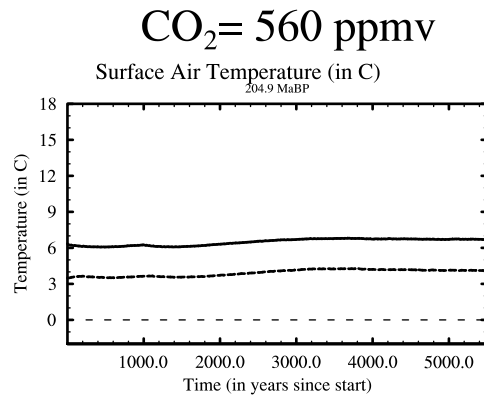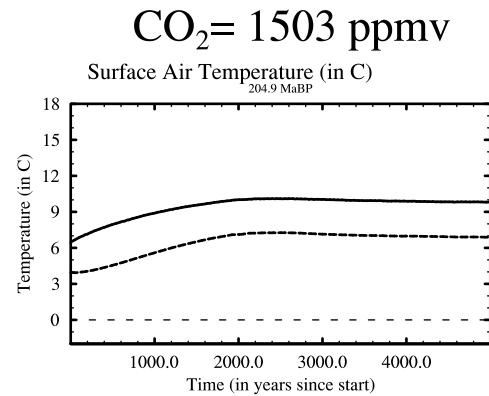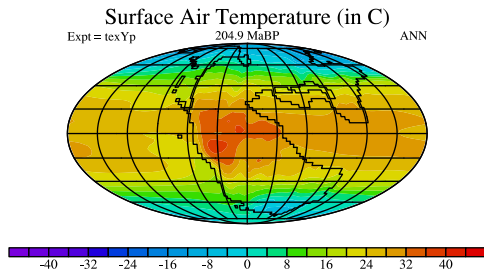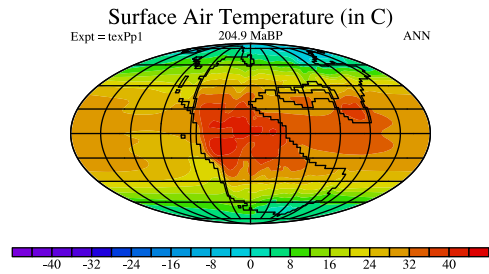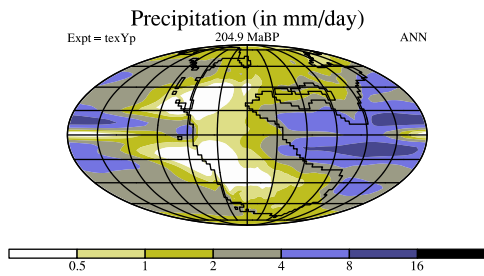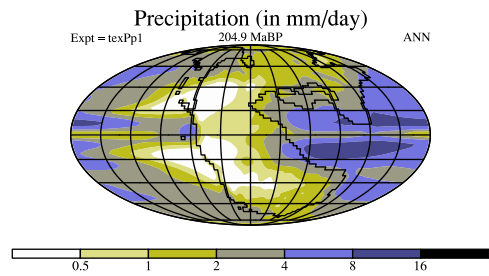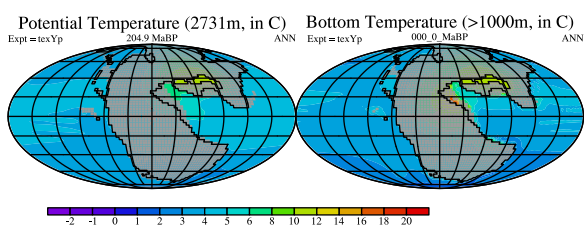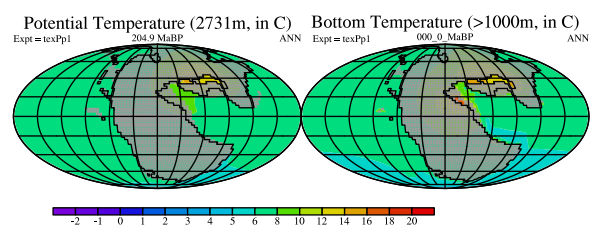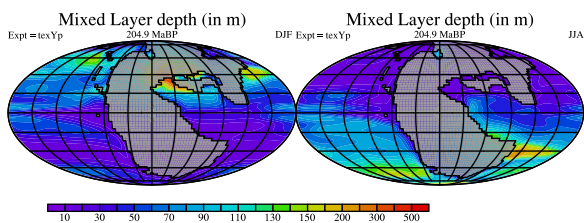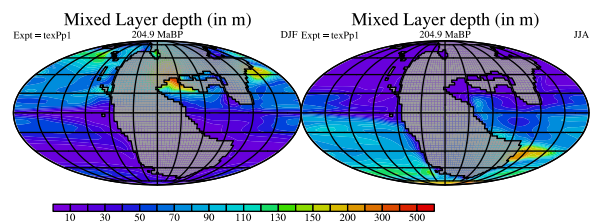

# Late Triassic (late Norian, 213.2 Ma)

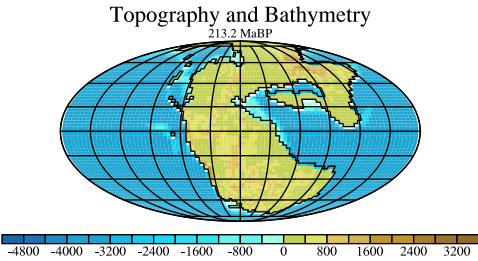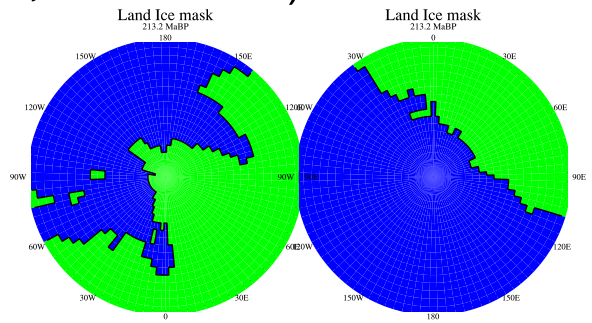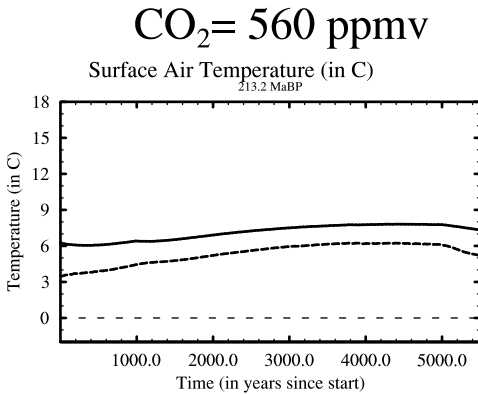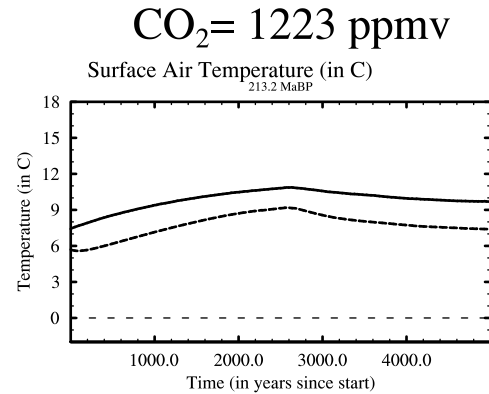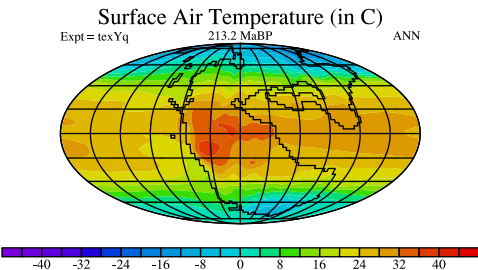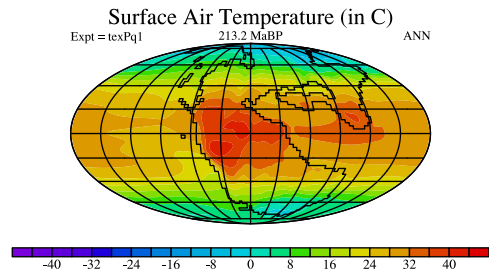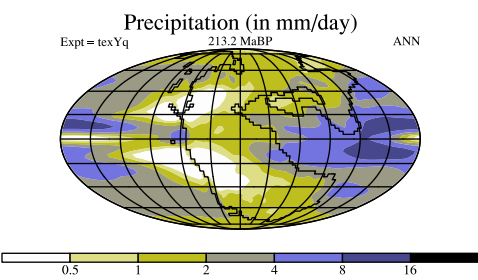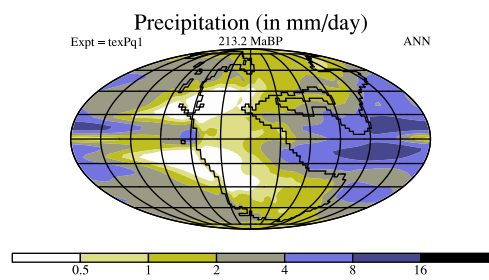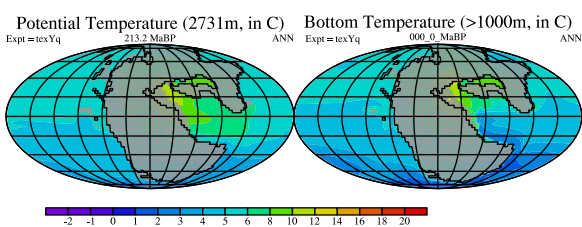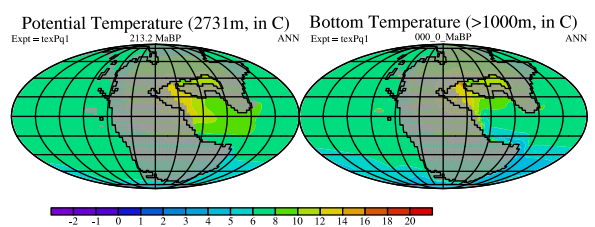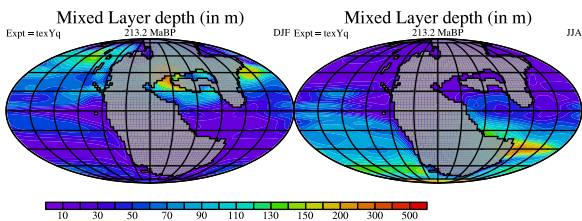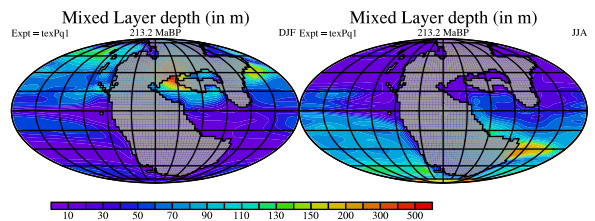



# Late Triassic (mid Norian, 217.8 Ma)

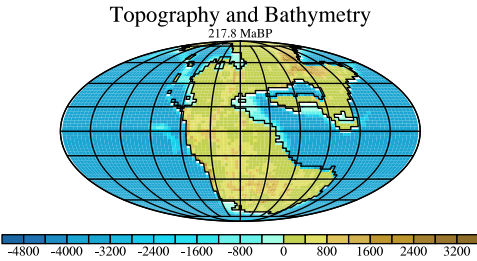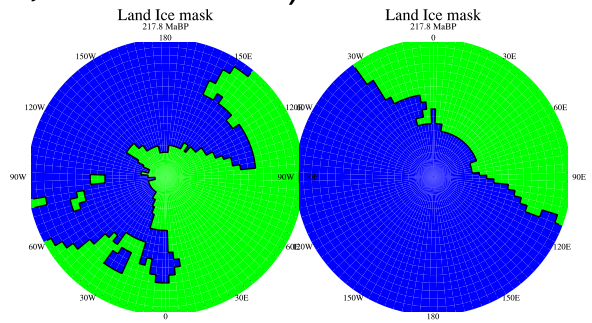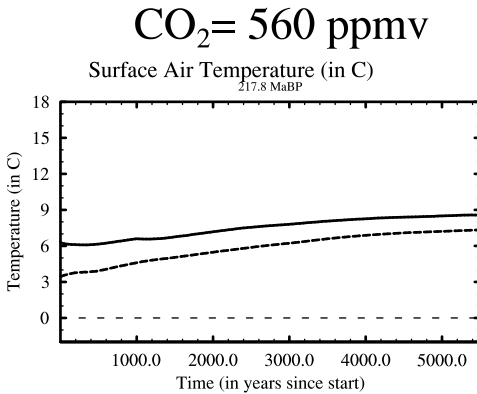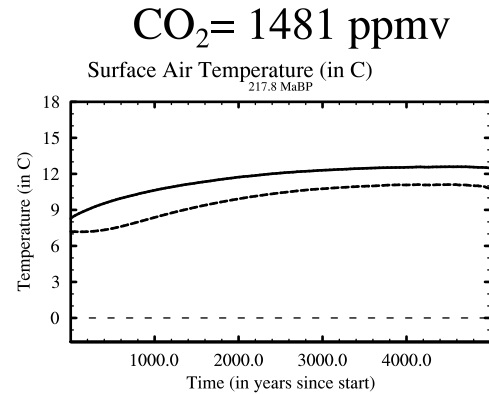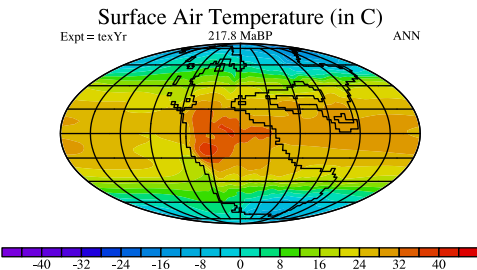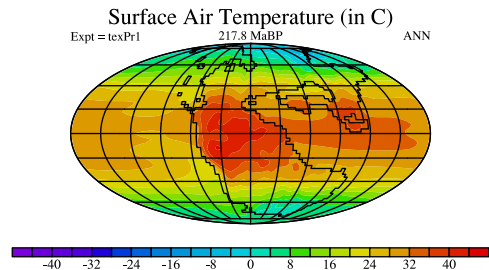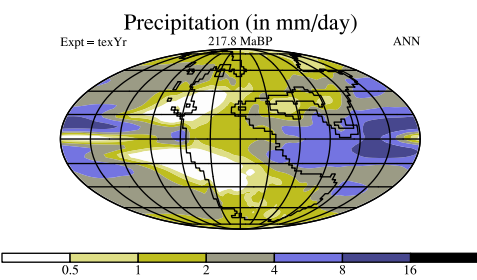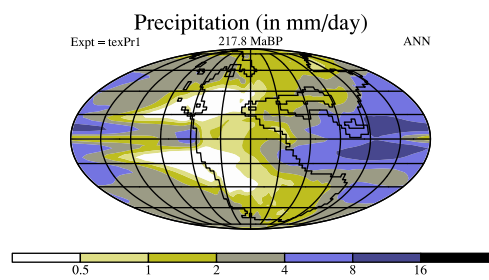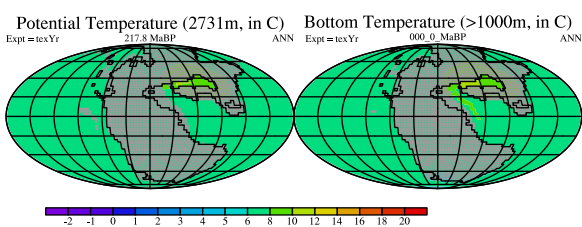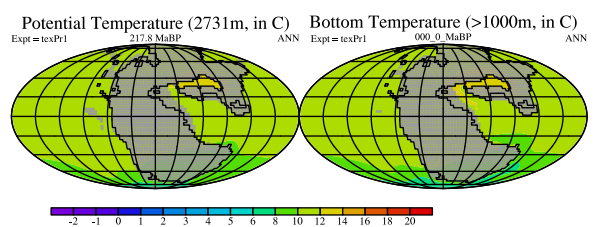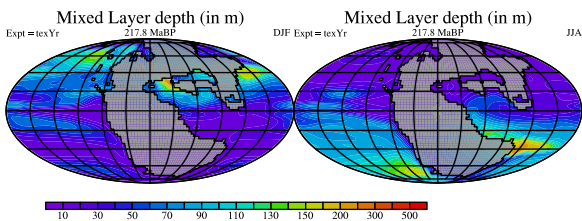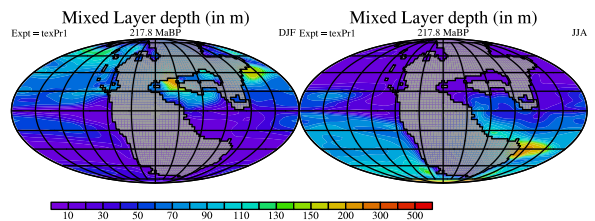

# Late Triassic (early Norian, 222.4 Ma)

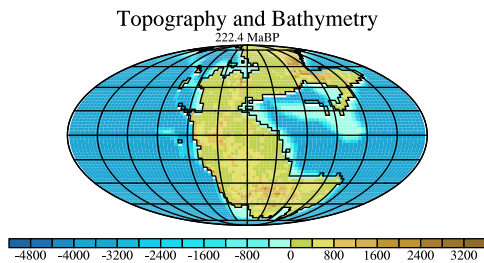

CO<sub>2</sub>= 557 ppmv

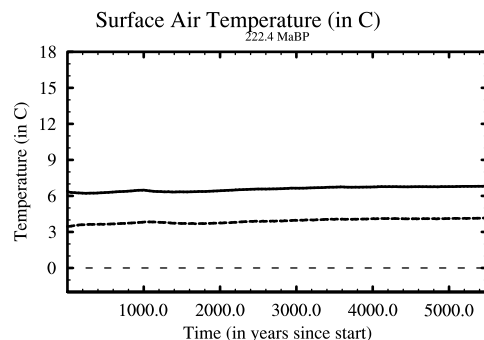

Surface Air Temperature (in C)  
Expt = texYs 222.4 MaBP ANN

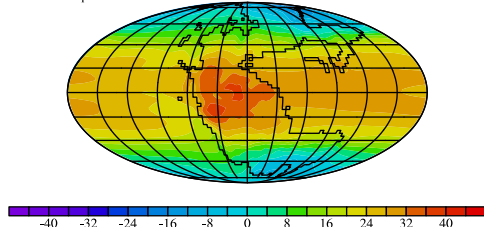

Precipitation (in mm/day)  
Expt = texYs 222.4 MaBP ANN

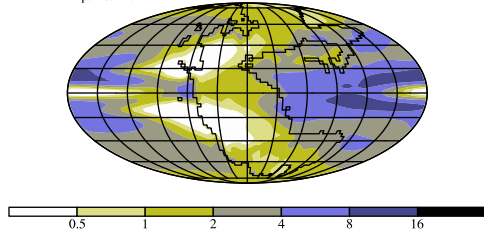

Potential Temperature (2731m, in C) Bottom Temperature (>1000m, in C)  
Expt = texYs 222.4 MaBP ANN Expt = texYs 000.0 MaBP ANN

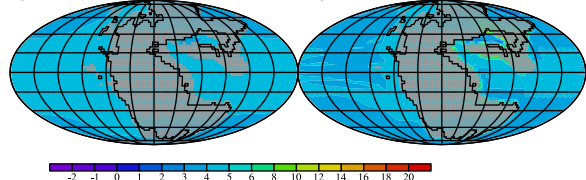

Mixed Layer depth (in m)  
Expt = texYs 222.4 MaBP DJF Expt = texYs 222.4 MaBP JJA

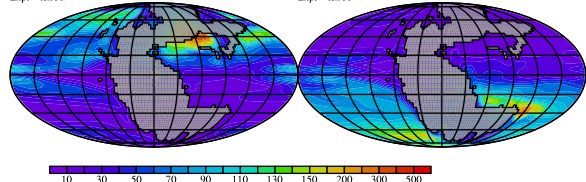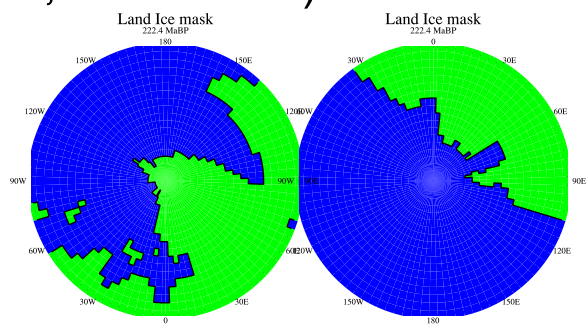

CO<sub>2</sub>= 1810 ppmv

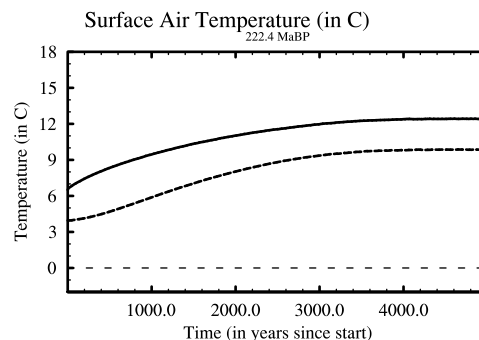

Surface Air Temperature (in C)  
Expt = texPsI 222.4 MaBP ANN

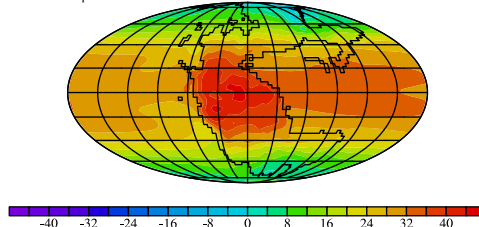

Precipitation (in mm/day)  
Expt = texPsI 222.4 MaBP ANN

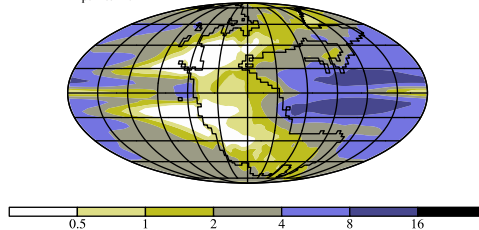

Potential Temperature (2731m, in C) Bottom Temperature (>1000m, in C)  
Expt = texPsI 222.4 MaBP ANN Expt = texPsI 000.0 MaBP ANN

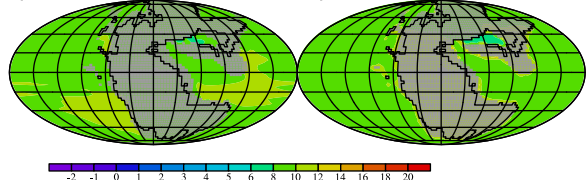

Mixed Layer depth (in m)  
Expt = texPsI 222.4 MaBP DJF Expt = texPsI 222.4 MaBP JJA

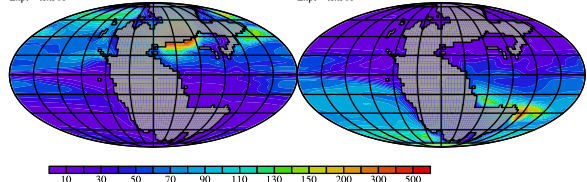

# Late Triassic (Carnian/Norian 227 Ma)

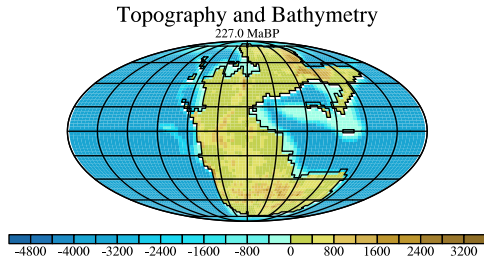

CO<sub>2</sub>= 553 ppmv

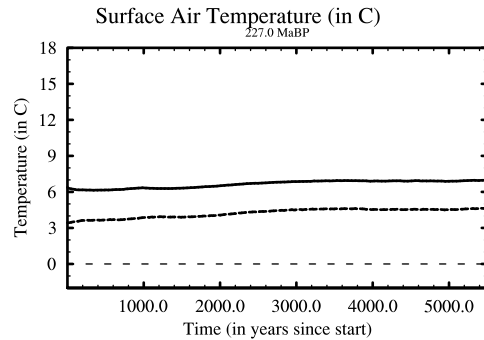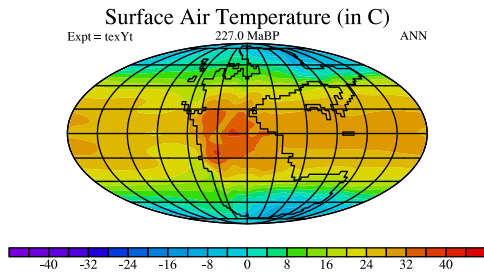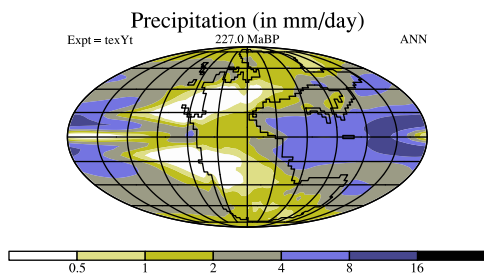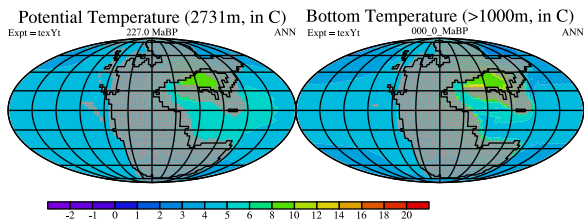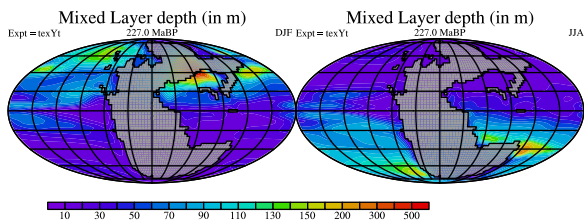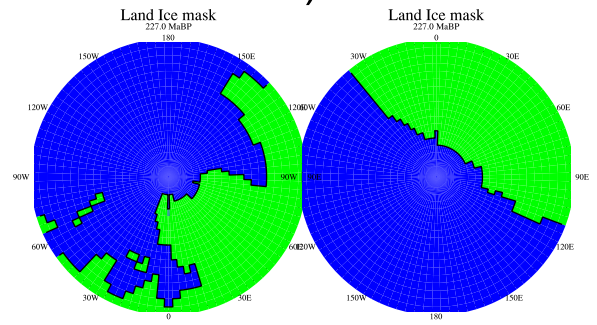

CO<sub>2</sub>= 2059 ppmv

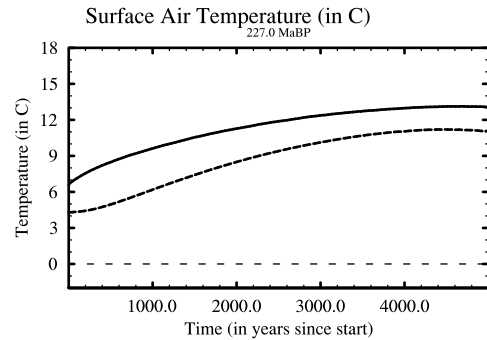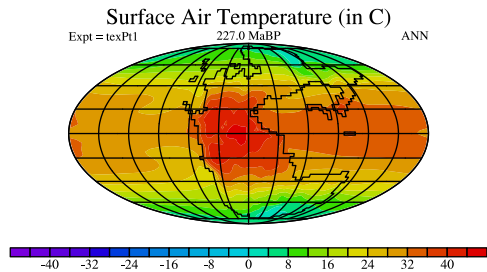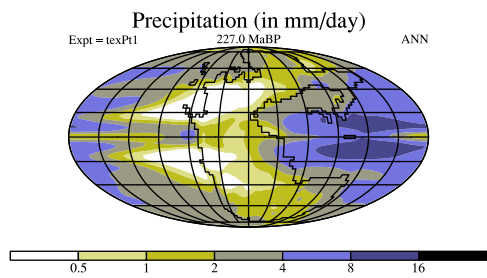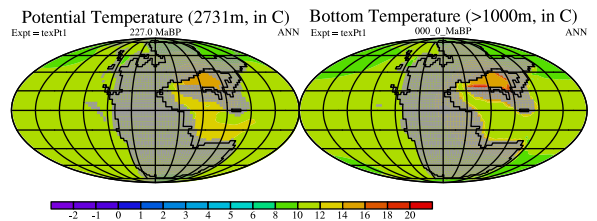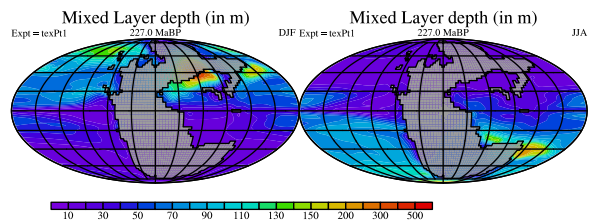



# Late Triassic (Carnian, 232 Ma)

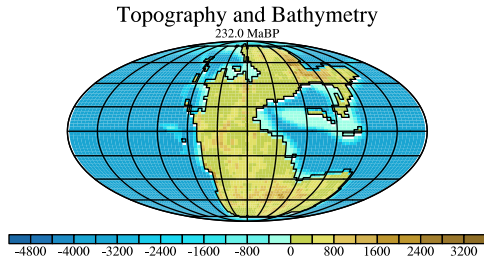

CO<sub>2</sub>= 549 ppmv

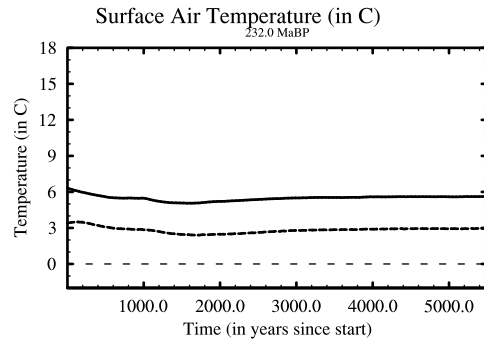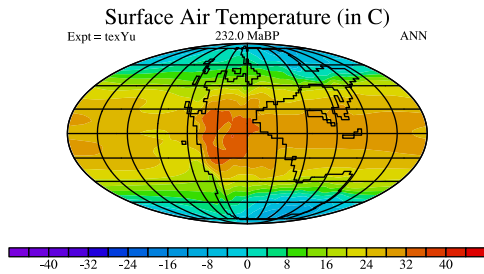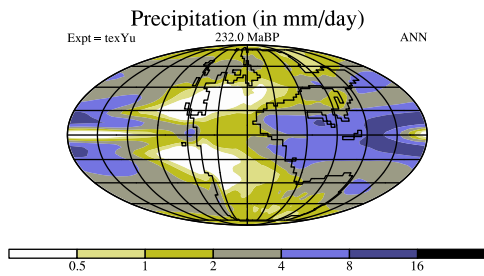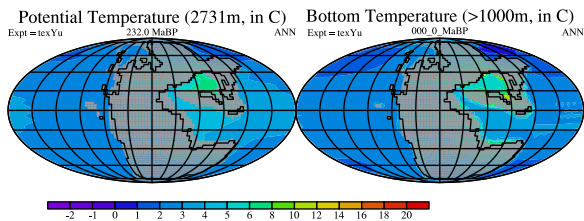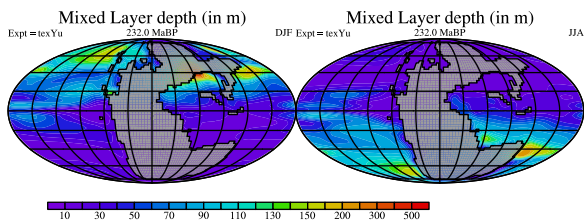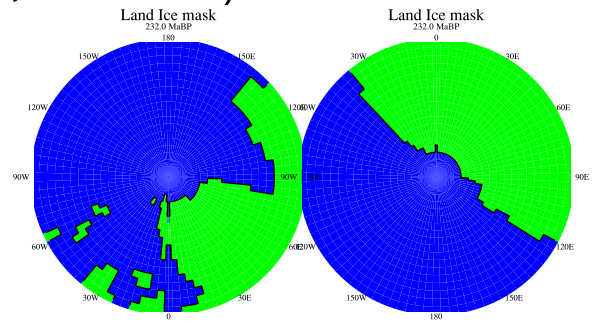

CO<sub>2</sub>= 1614 ppmv

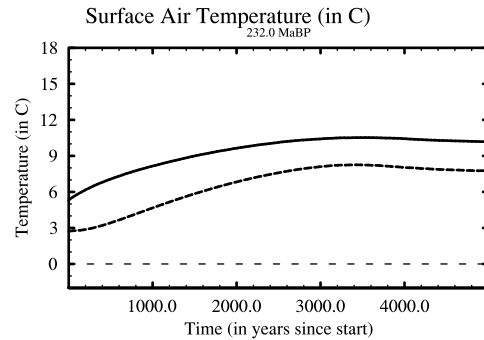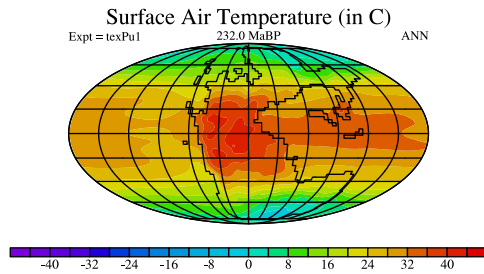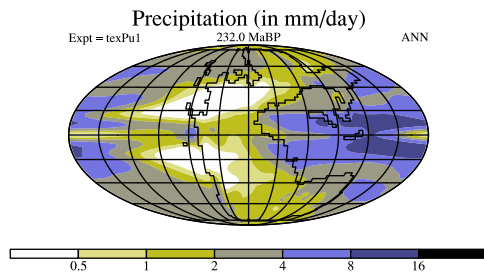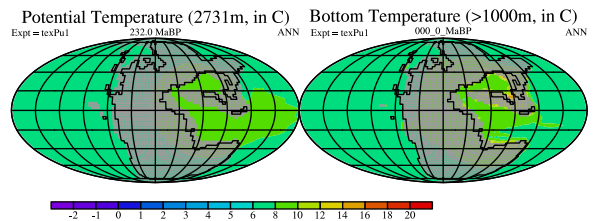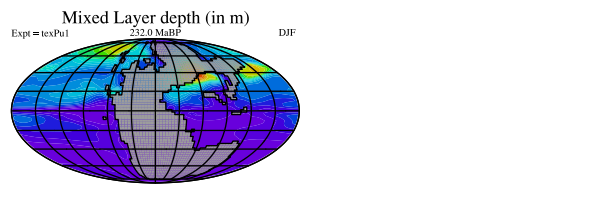

# Late Triassic (early Carnian, 233.6)

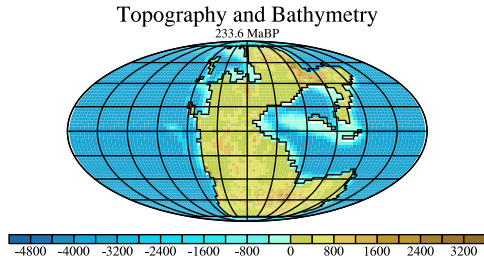

CO<sub>2</sub>= 548 ppmv

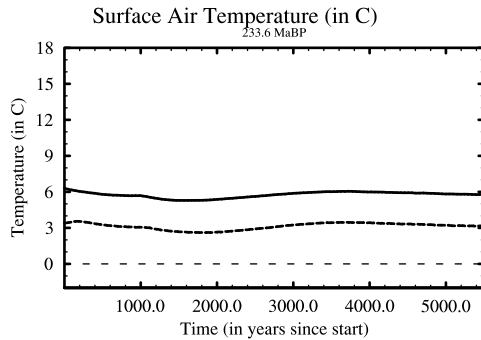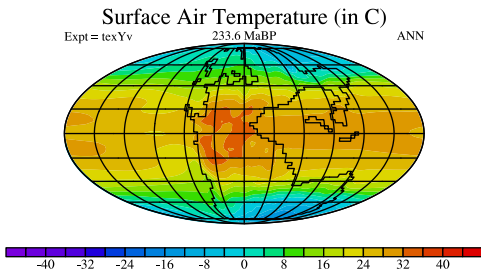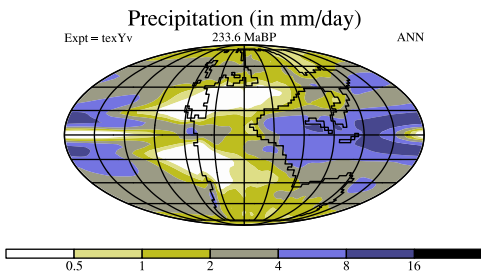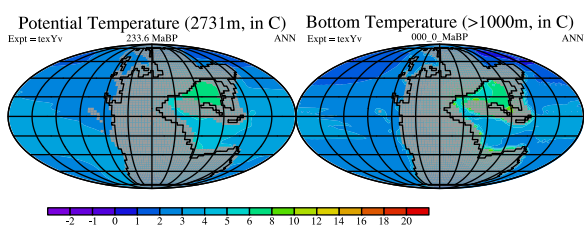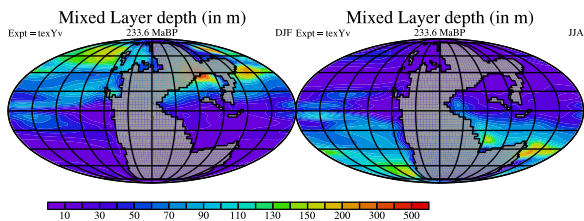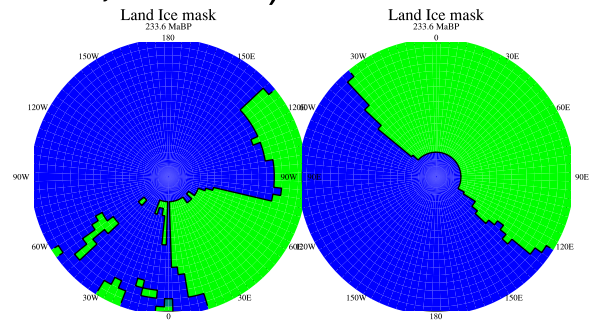

CO<sub>2</sub>= 1492 ppmv

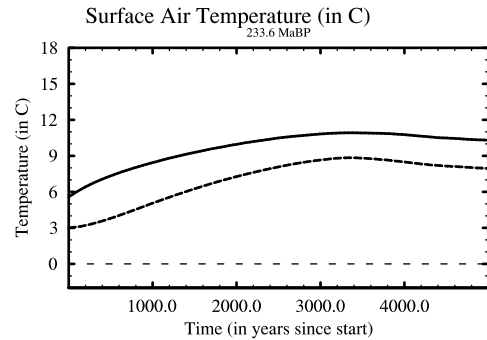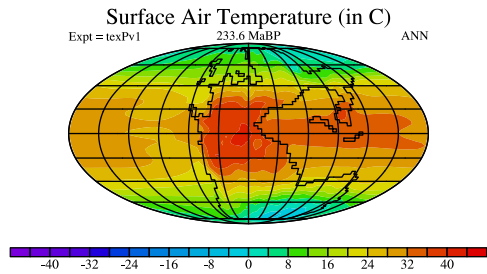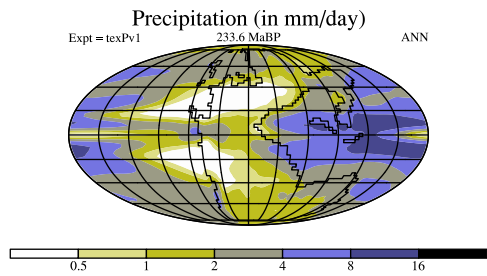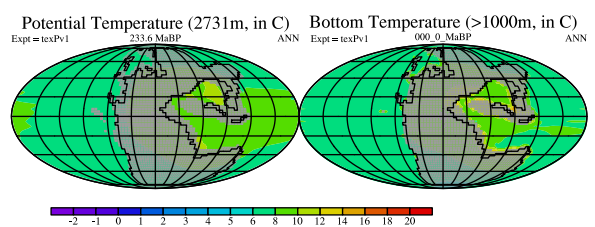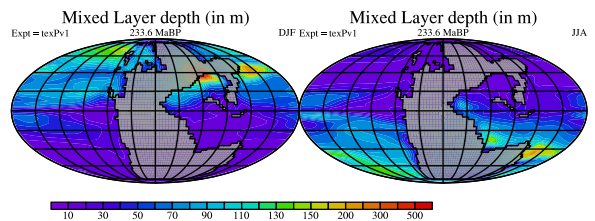

# Middle Triassic (Ladinian, 239.5 Ma)

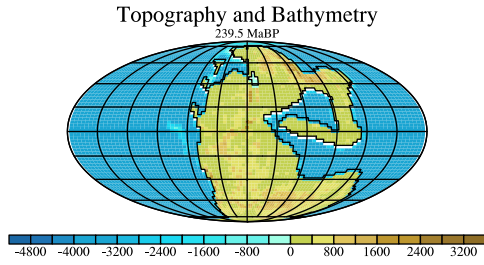

CO<sub>2</sub>= 543 ppmv

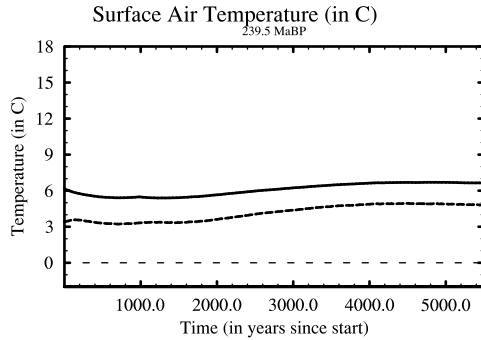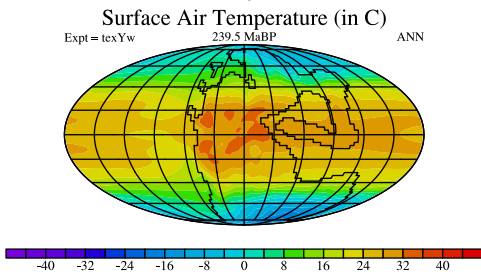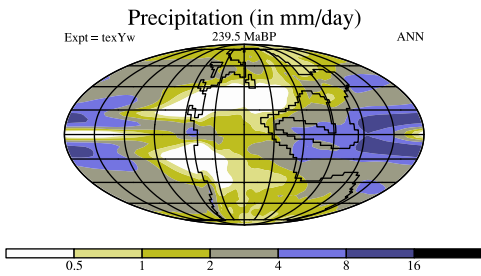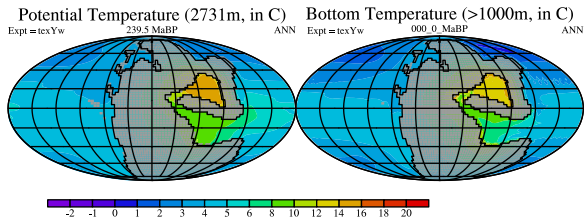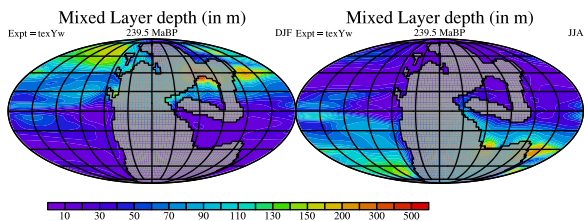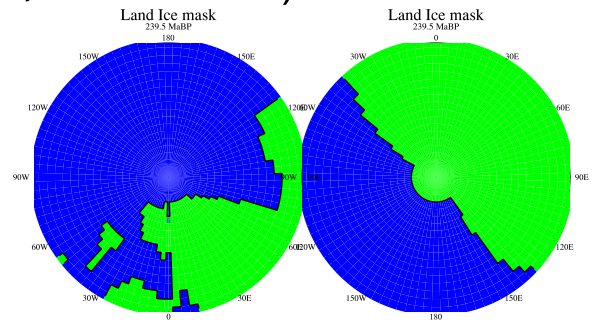

CO<sub>2</sub>= 1034 ppmv

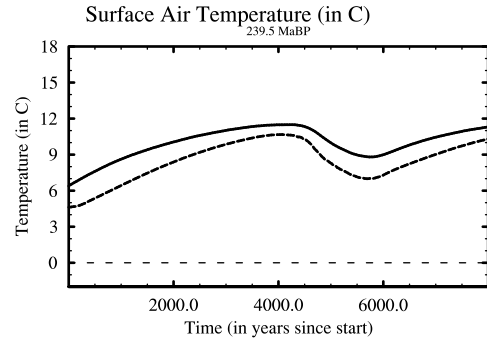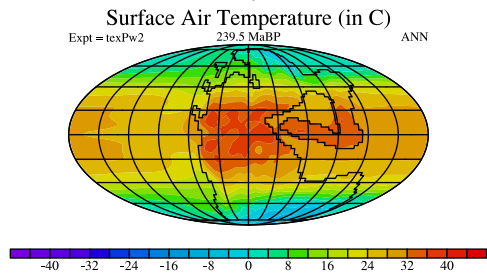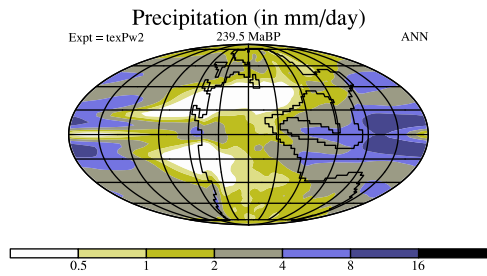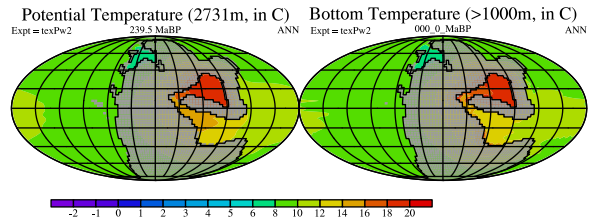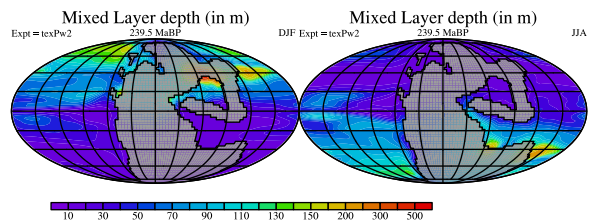



# Middle Triassic (Anisian, 244.6 Ma)

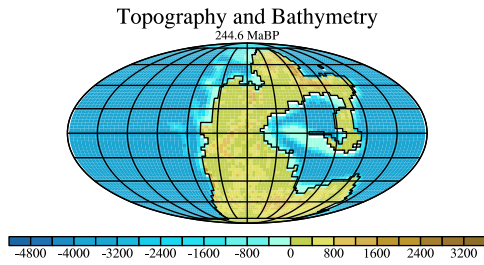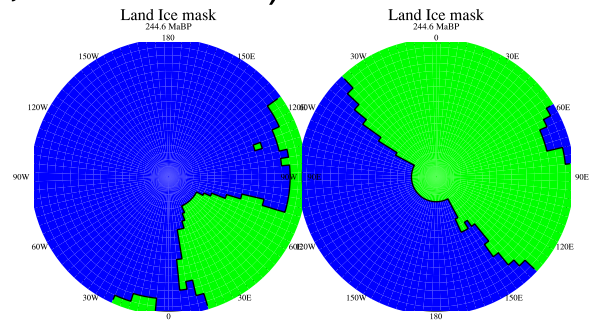

CO<sub>2</sub>= 540 ppmv

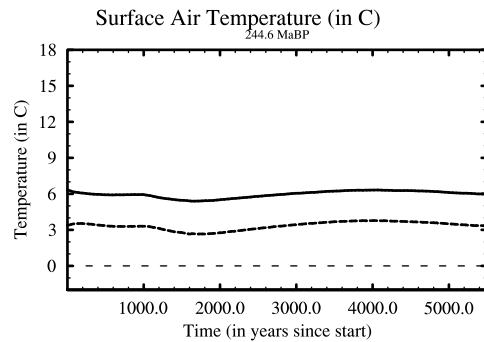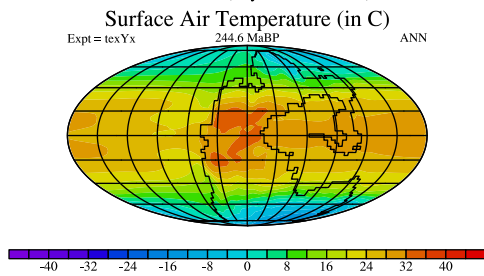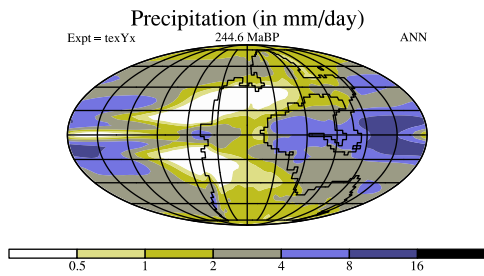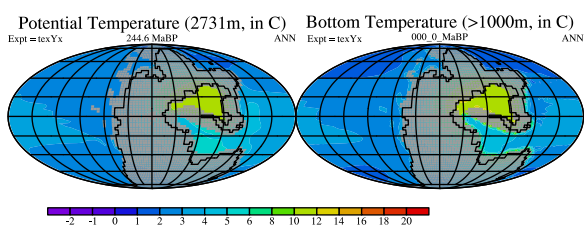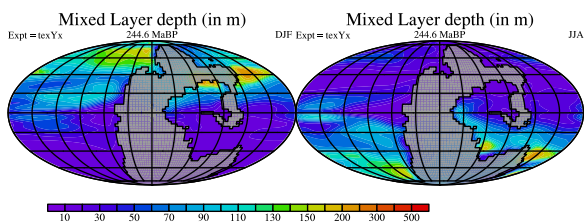

CO<sub>2</sub>= 419 ppmv

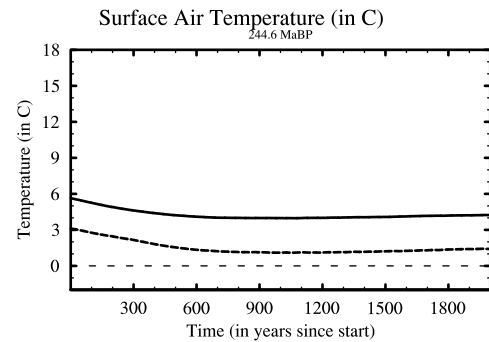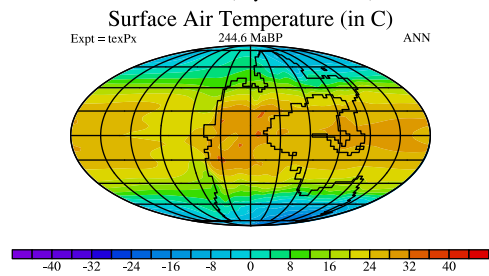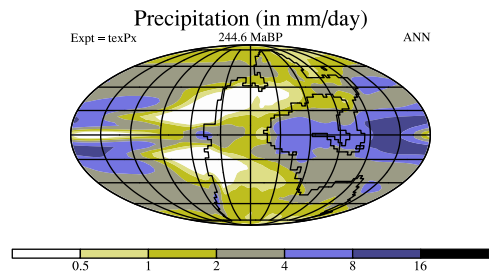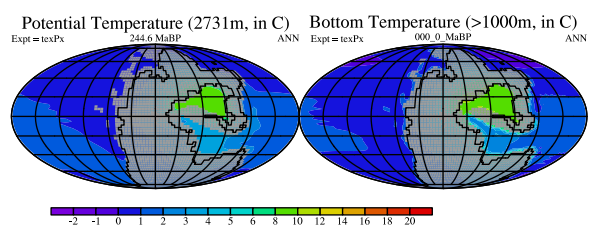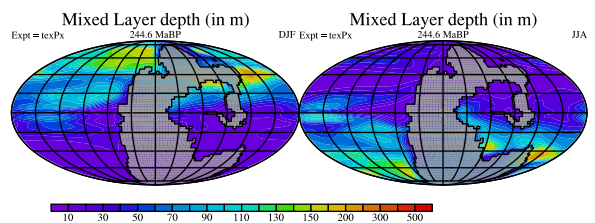

# Permo-Triassic Boundary (252 Ma)

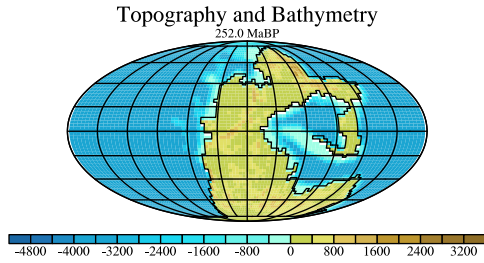

CO<sub>2</sub> = 534 ppmv

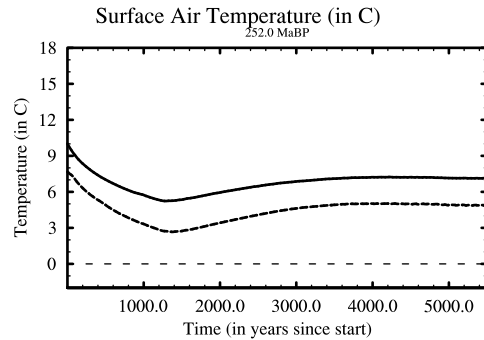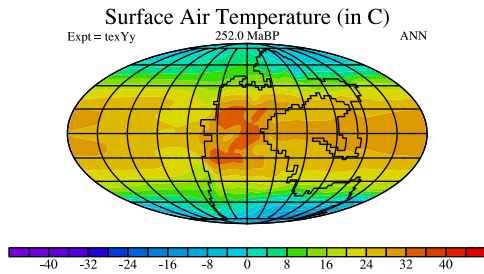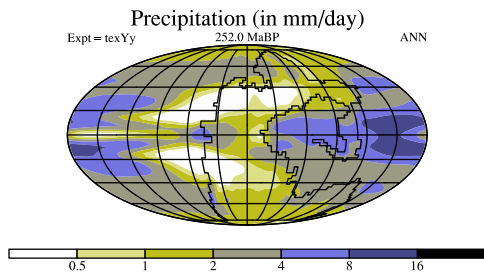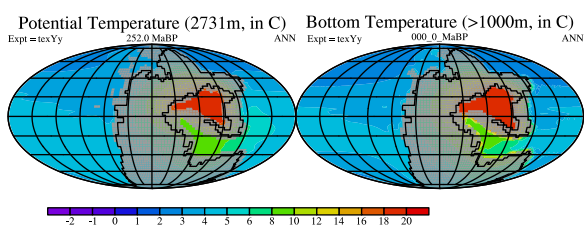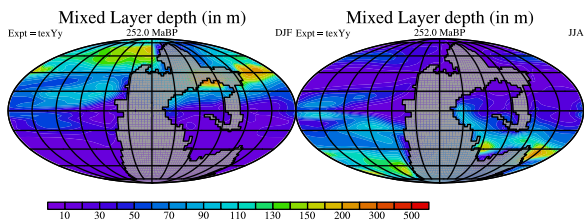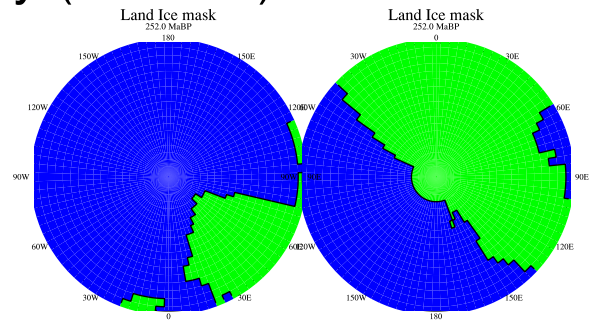

CO<sub>2</sub> = 879 ppmv

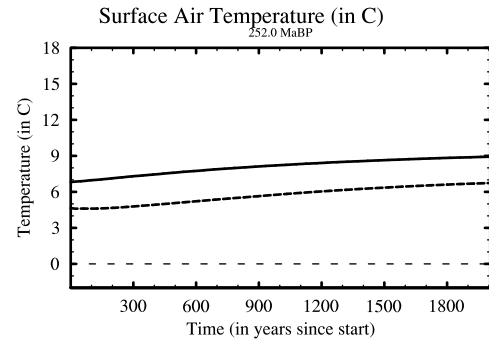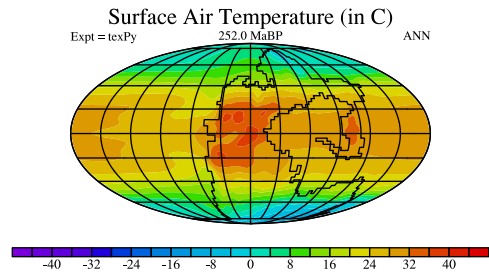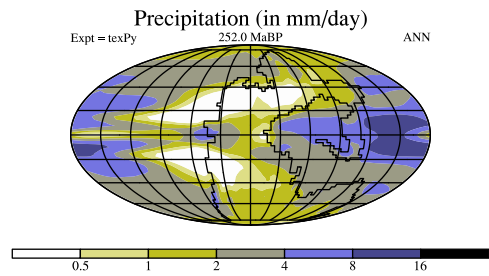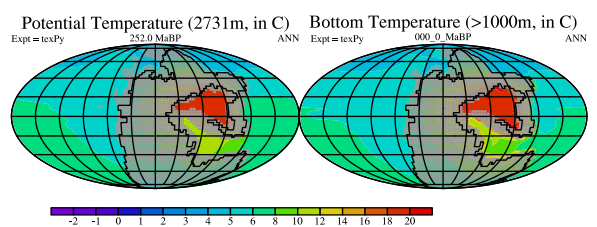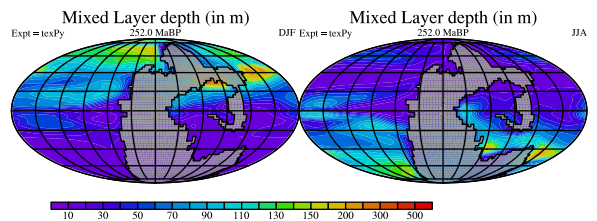

# Late Permian (Lopingian, 256 Ma)

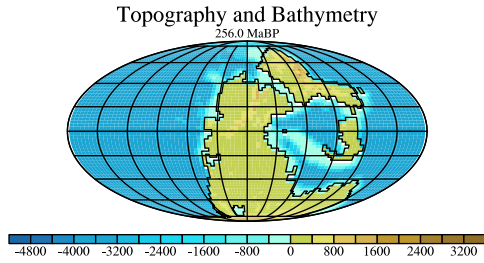

CO<sub>2</sub>= 531 ppmv

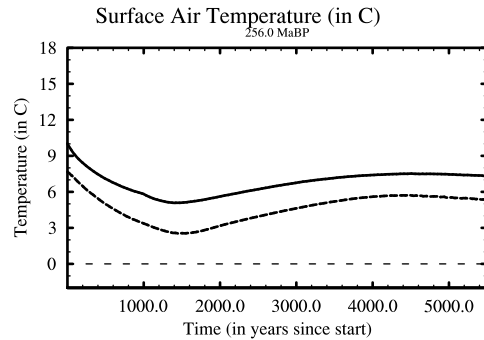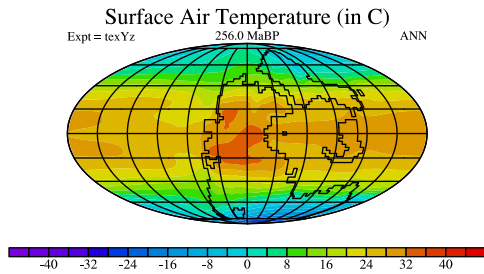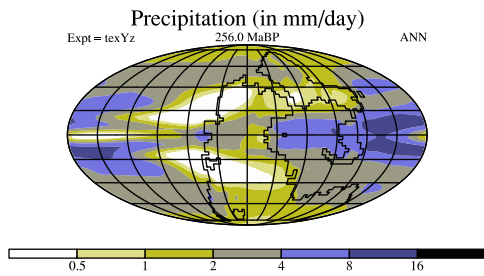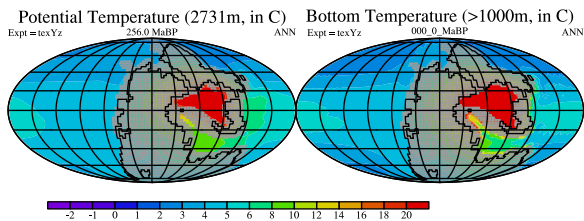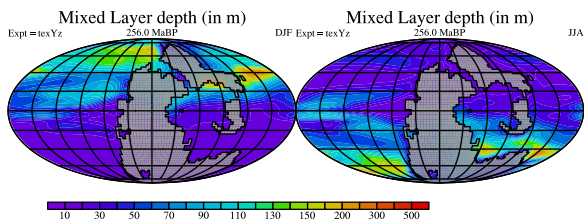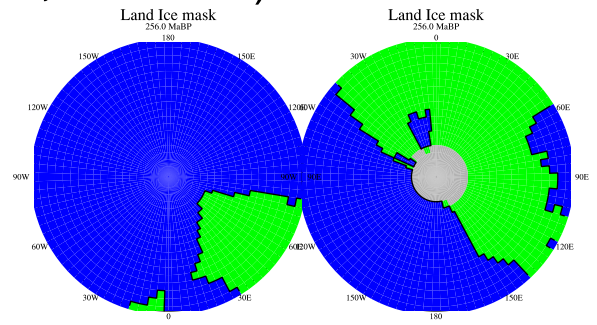

CO<sub>2</sub>= 811 ppmv

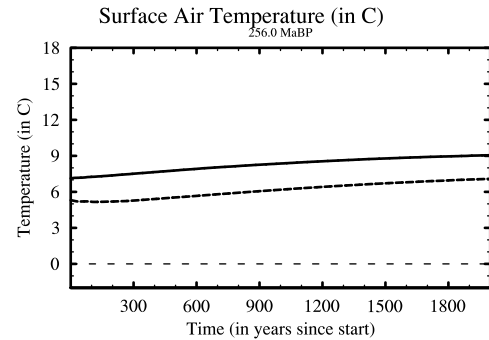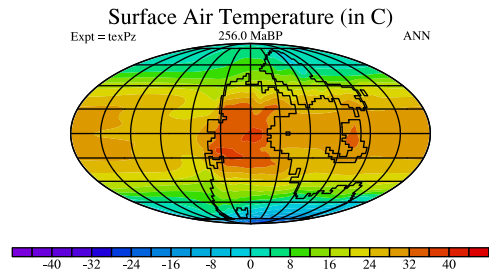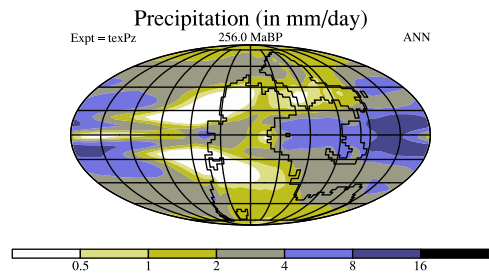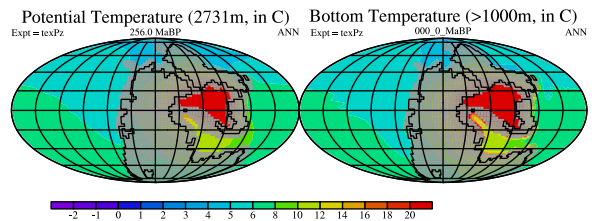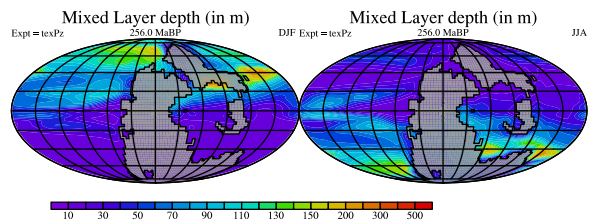



# late Middle Permian (Capitanian, 262.5 Ma)

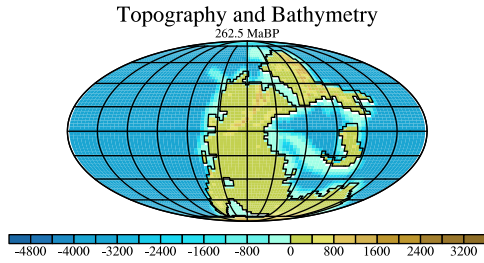

CO<sub>2</sub>= 526 ppmv

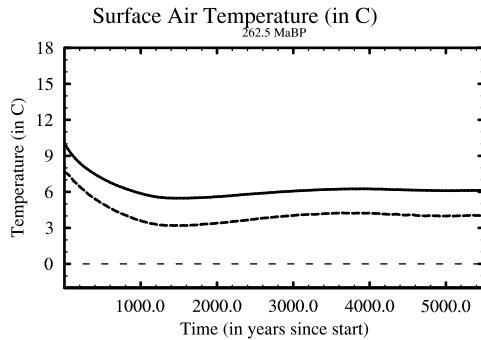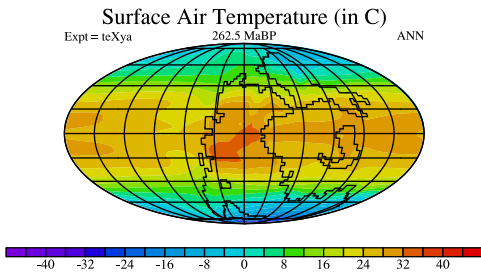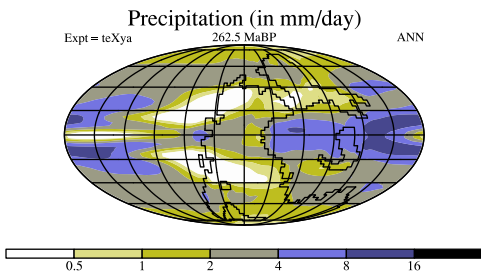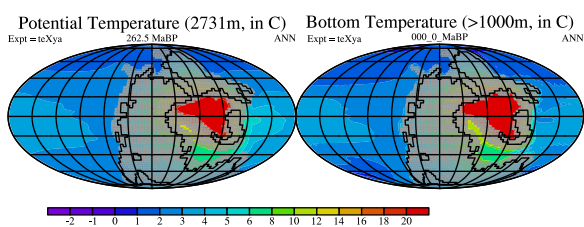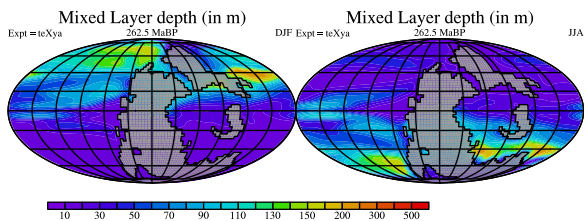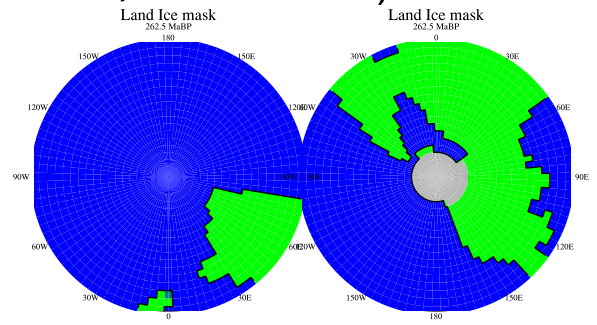

CO<sub>2</sub>= 352 ppmv

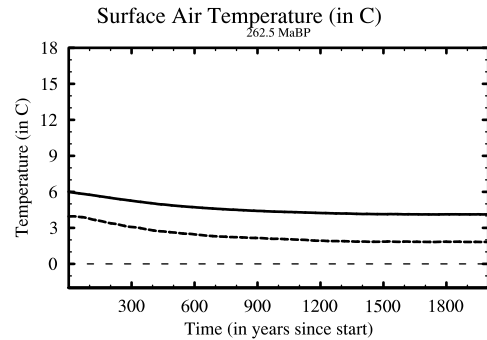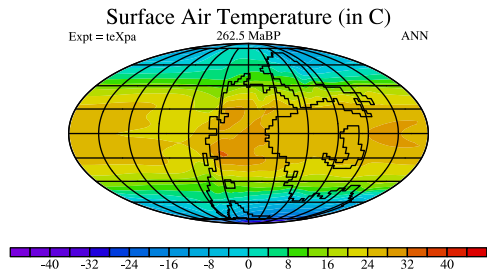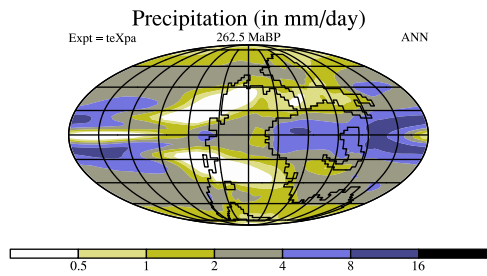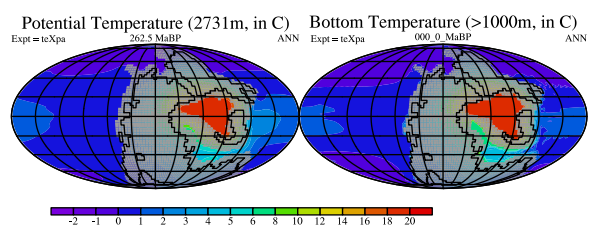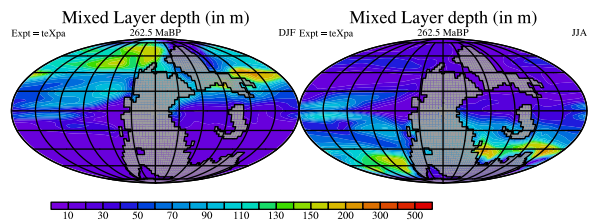

# Middle Permian (Wordian/Capitanian Boundary 265.1 Ma)

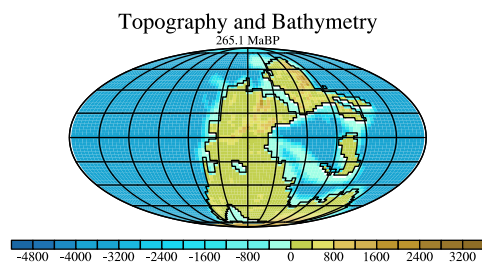

CO<sub>2</sub>= 524 ppmv

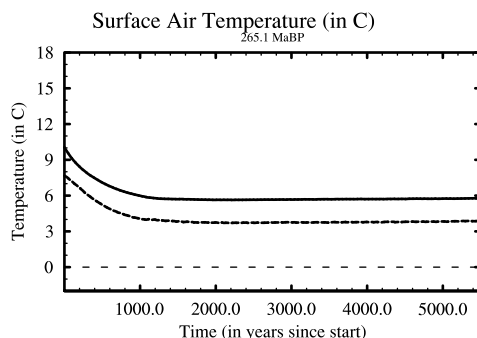

Surface Air Temperature (in C)  
Expt = teXyb ANN

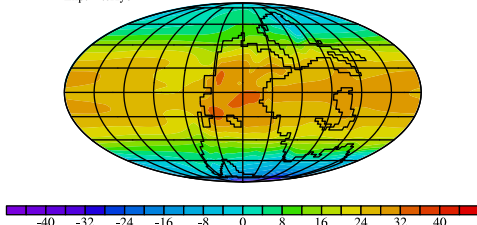

Precipitation (in mm/day)  
Expt = teXyb ANN

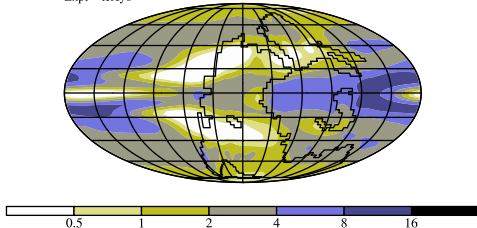

Potential Temperature (2731m, in C) Bottom Temperature (>1000m, in C)  
Expt = teXyb ANN Expt = teXyb ANN

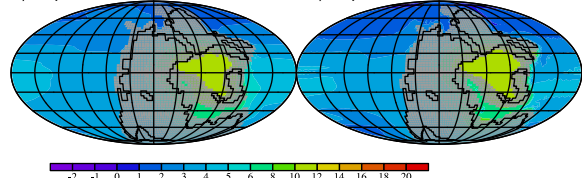

Mixed Layer depth (in m) DIF Expt = teXyb ANN

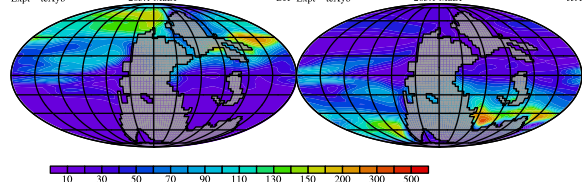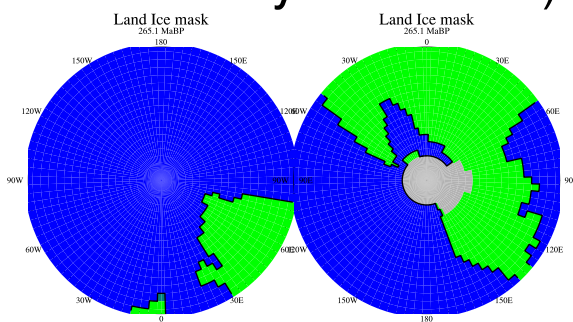

CO<sub>2</sub>= 321 ppmv

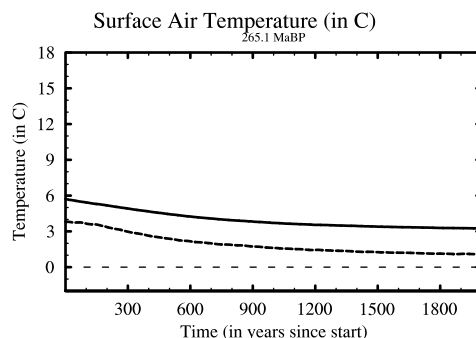

Surface Air Temperature (in C)  
Expt = teXpb ANN

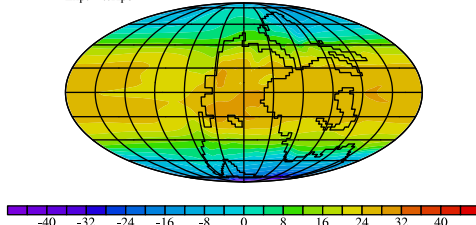

Precipitation (in mm/day)  
Expt = teXpb ANN

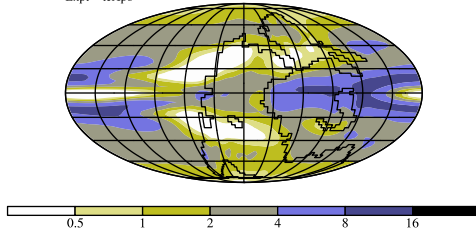

Potential Temperature (2731m, in C) Bottom Temperature (>1000m, in C)  
Expt = teXpb ANN Expt = teXpb ANN

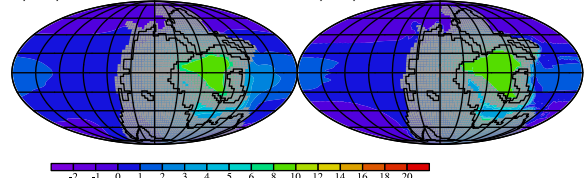

Mixed Layer depth (in m) DIF Expt = teXpb ANN

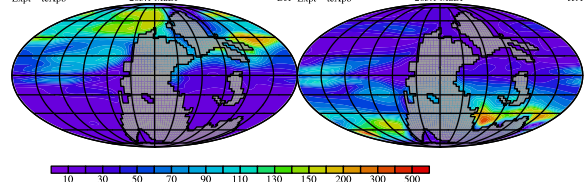

# Middle Permian (Roadian&Wordian, 268.7 Ma)

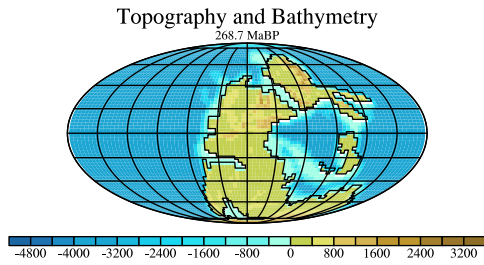

CO<sub>2</sub>= 521 ppmv

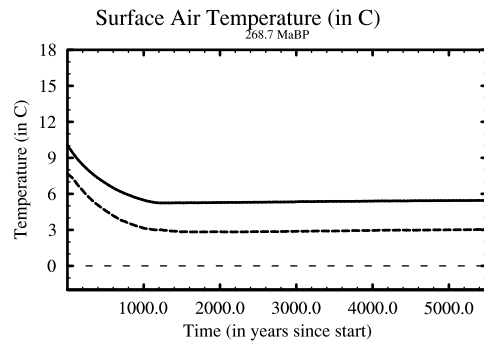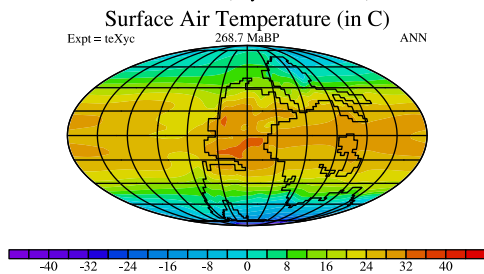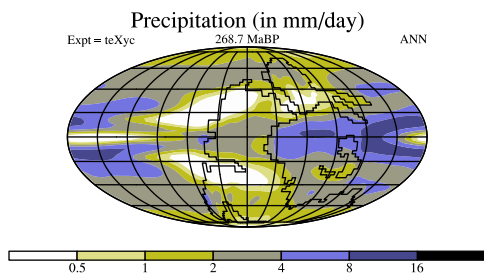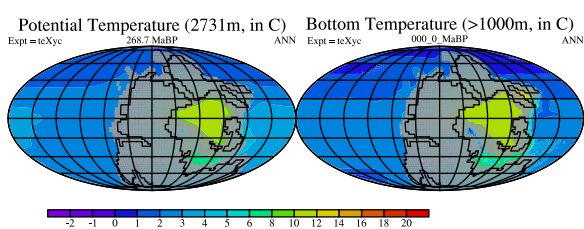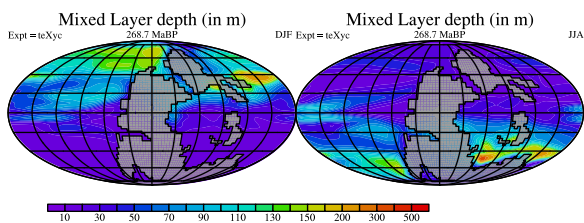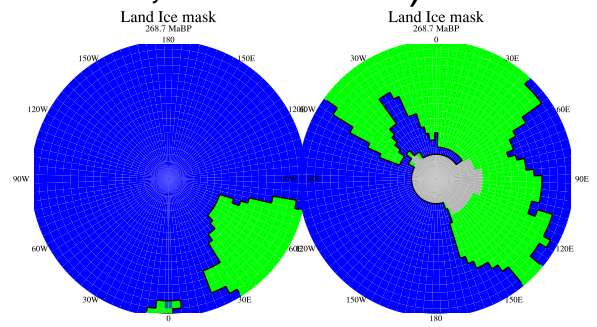

CO<sub>2</sub>= 311 ppmv

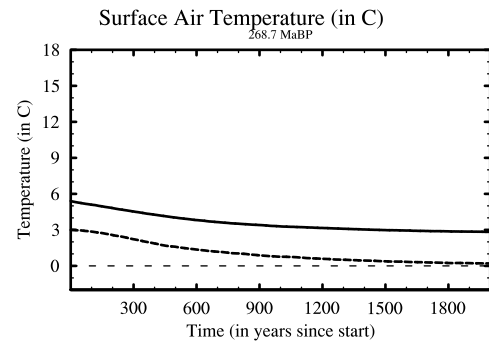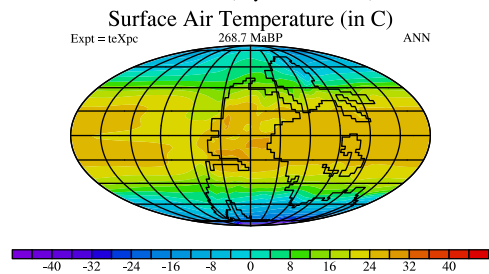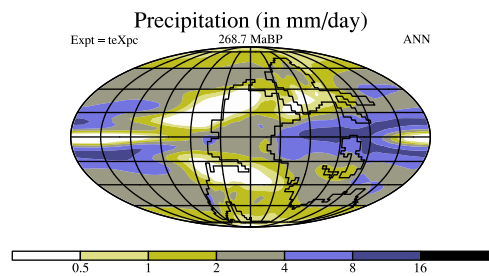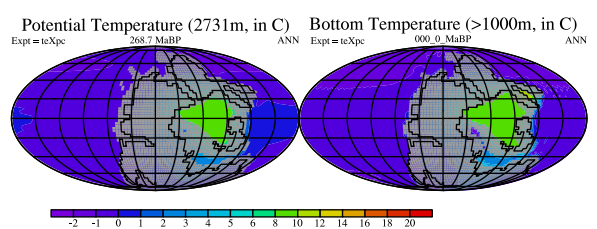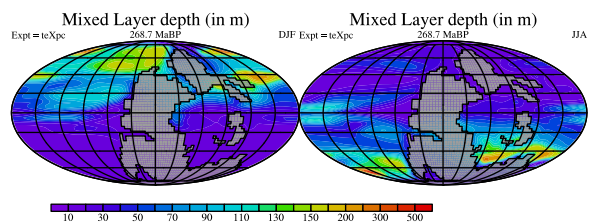



# Early Permian (late Kungurian, 275 Ma)

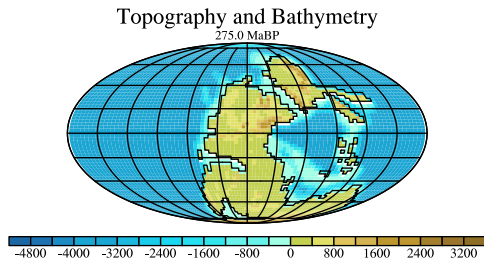

CO<sub>2</sub>= 517 ppmv

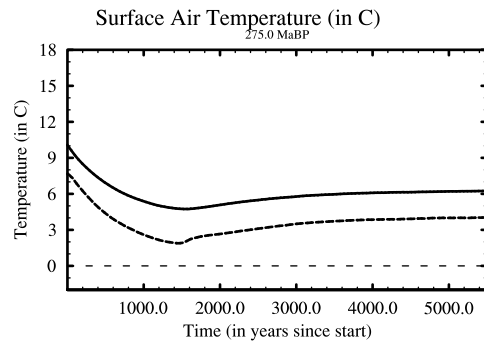

Surface Air Temperature (in C)  
Expt = teXyd 275.0 MaBP ANN

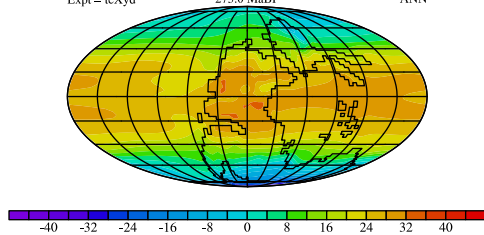

Precipitation (in mm/day)  
Expt = teXyd 275.0 MaBP ANN

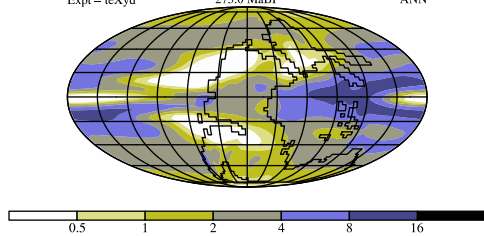

Potential Temperature (2731m, in C) Bottom Temperature (>1000m, in C)  
Expt = teXyd 275.0 MaBP ANN Expt = teXyd 000.0 MaBP ANN

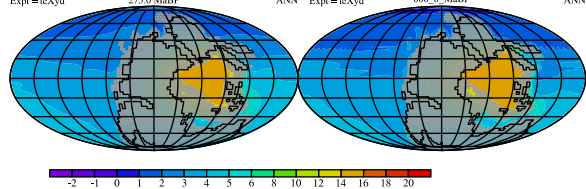

Mixed Layer depth (in m) Mixed Layer depth (in m)  
Expt = teXyd 275.0 MaBP DJF Expt = teXyd 275.0 MaBP JJA

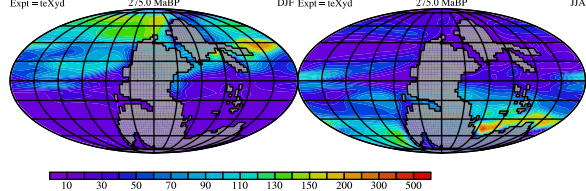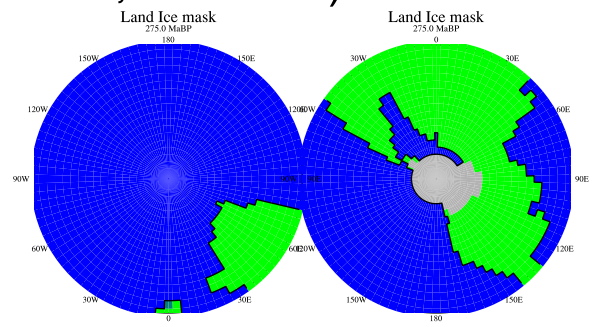

CO<sub>2</sub>= 556 ppmv

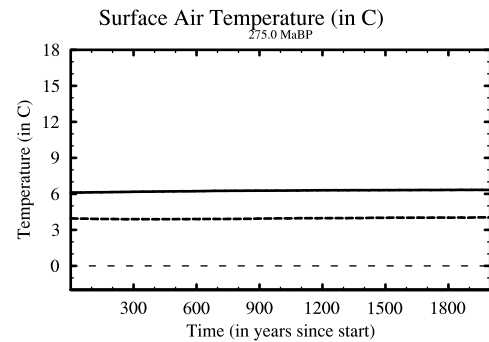

Surface Air Temperature (in C)  
Expt = teXpd 275.0 MaBP ANN

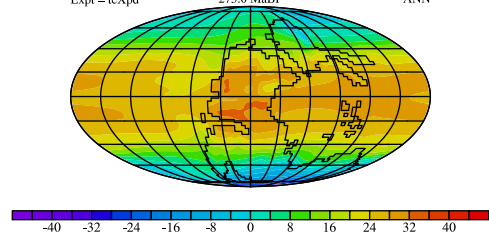

Precipitation (in mm/day)  
Expt = teXpd 275.0 MaBP ANN

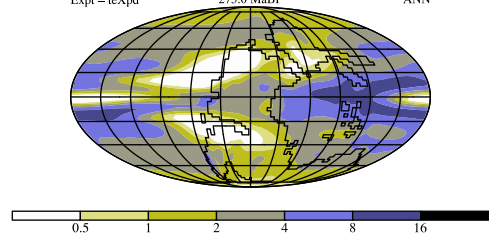

Potential Temperature (2731m, in C) Bottom Temperature (>1000m, in C)  
Expt = teXpd 275.0 MaBP ANN Expt = teXpd 000.0 MaBP ANN

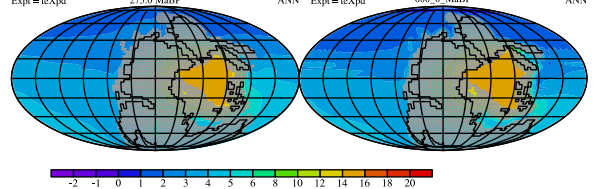

Mixed Layer depth (in m) Mixed Layer depth (in m)  
Expt = teXpd 275.0 MaBP DJF Expt = teXpd 275.0 MaBP JJA

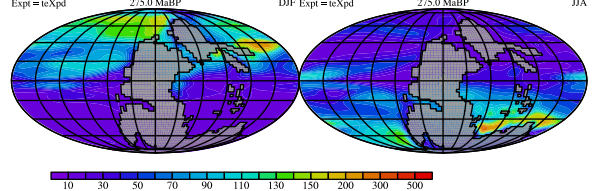

# Early Permian (early Kungurian, 280 Ma)

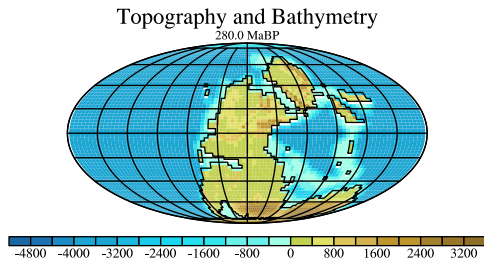

CO<sub>2</sub>= 513 ppmv

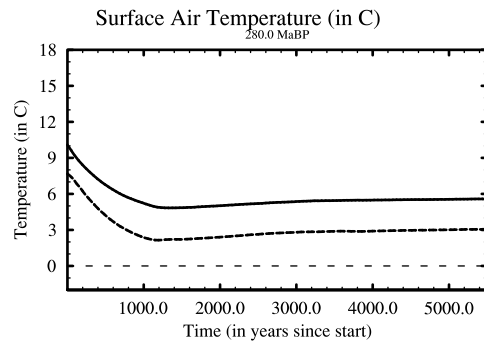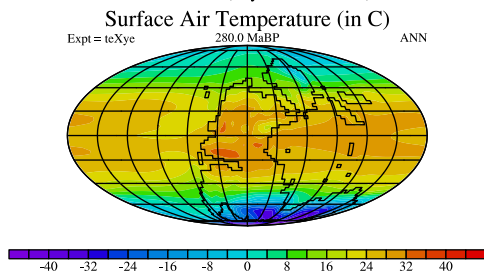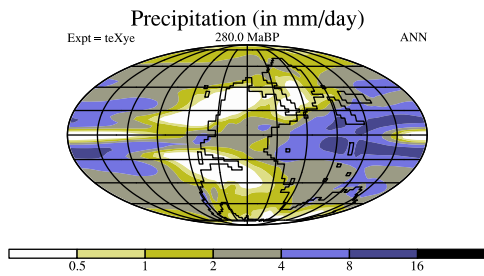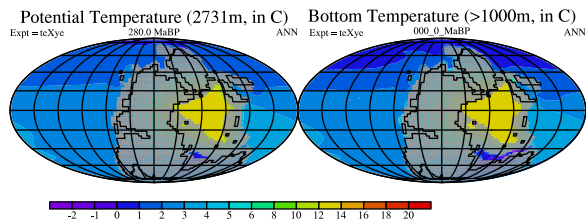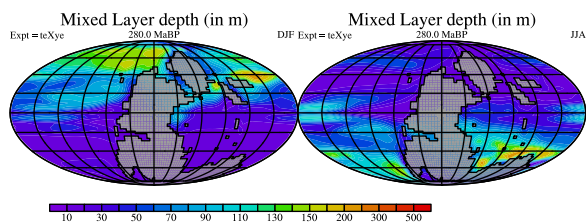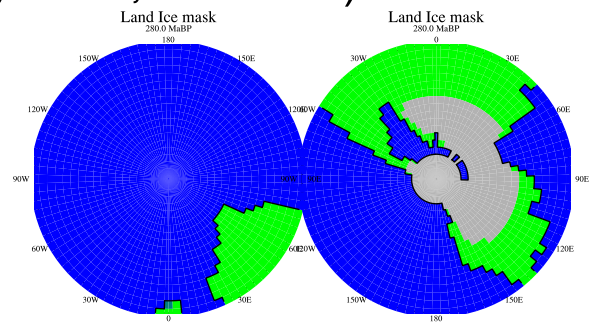

CO<sub>2</sub>= 690 ppmv

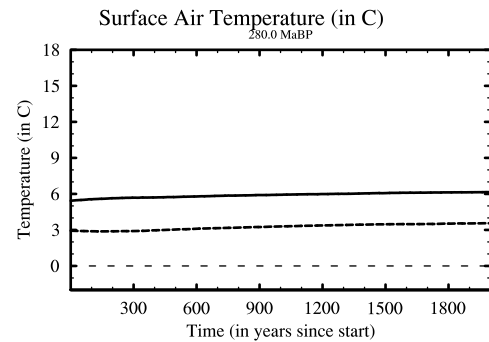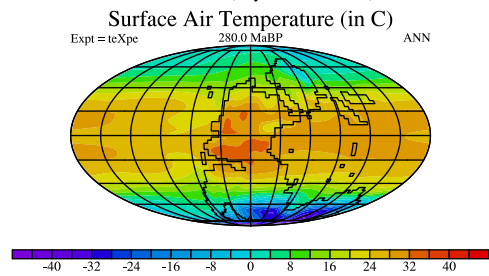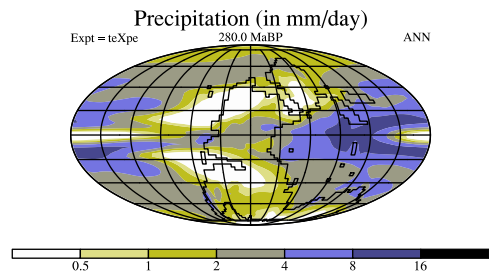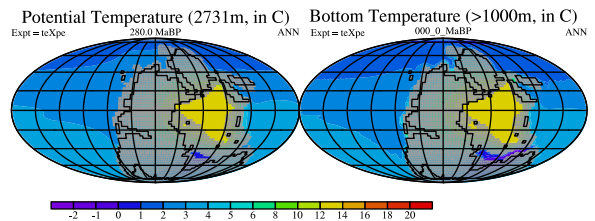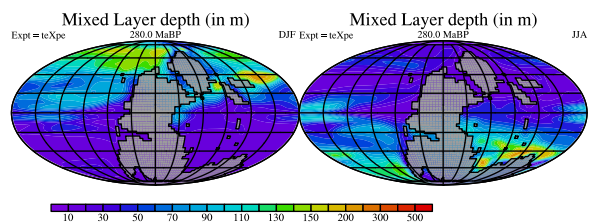

# Early Permian (Artinskian, 286.8 Ma)

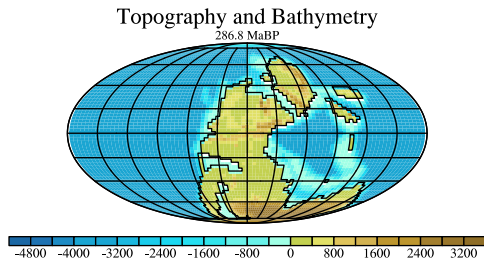

CO<sub>2</sub>= 508 ppmv

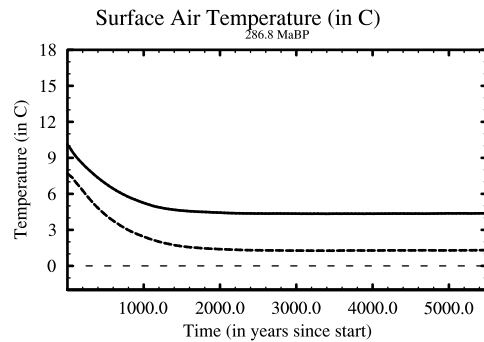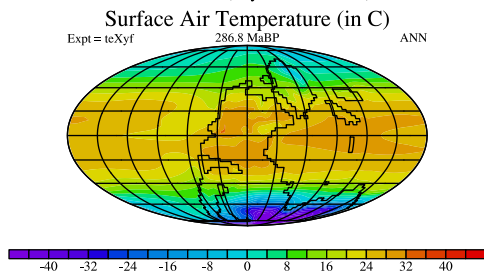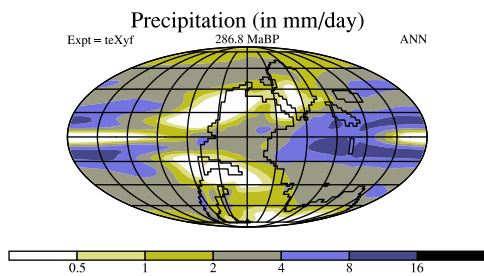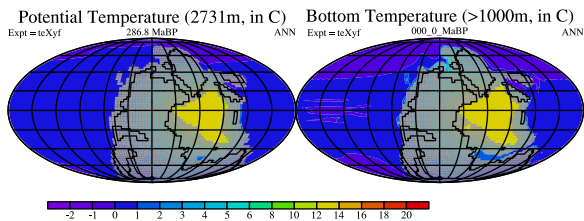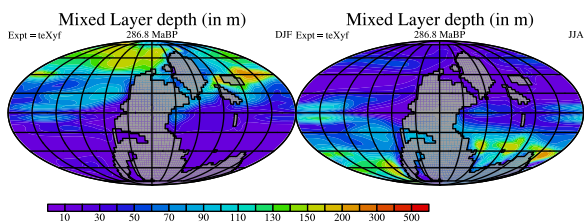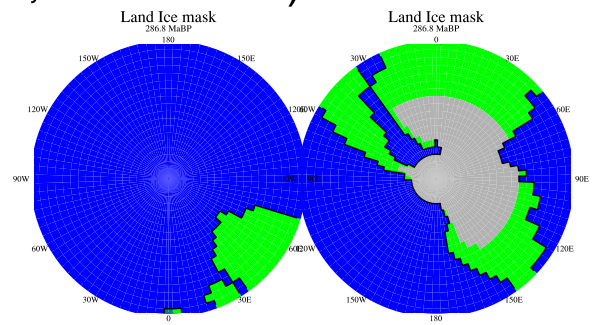

CO<sub>2</sub>= 626 ppmv

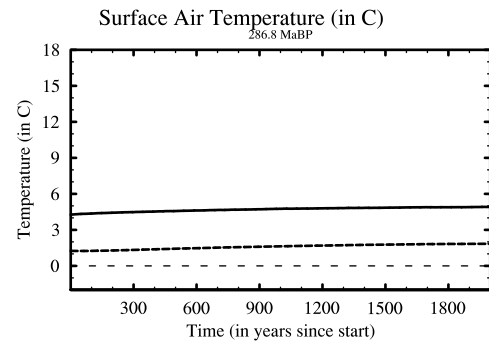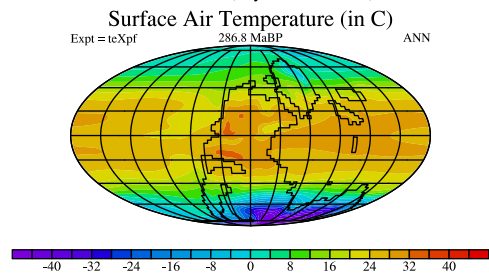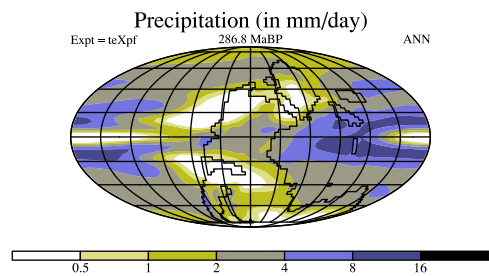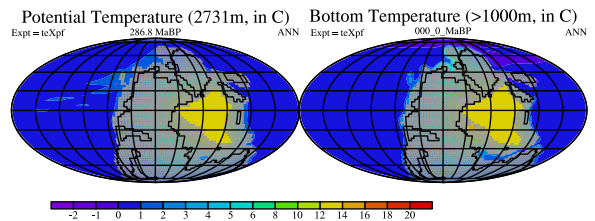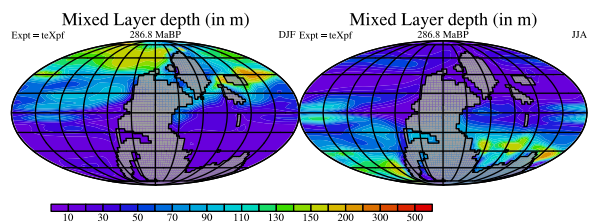



# Early Permian (Sakmarian, 292.6 Ma)

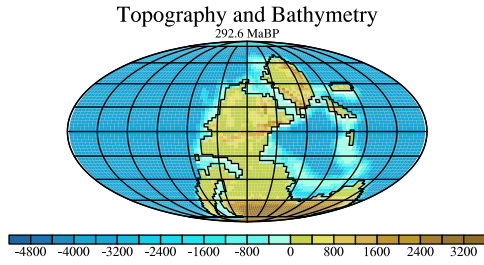

CO<sub>2</sub> = 503 ppmv

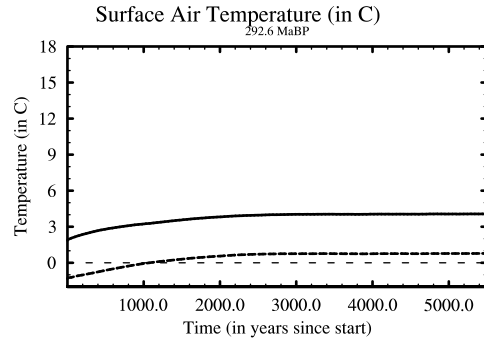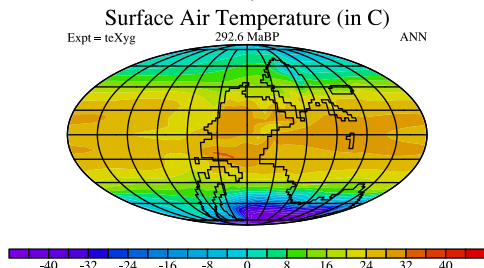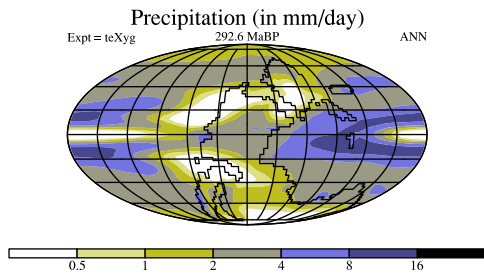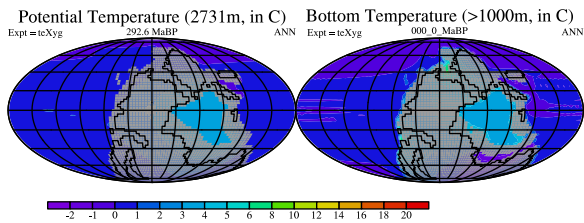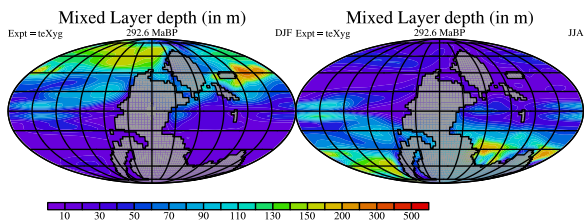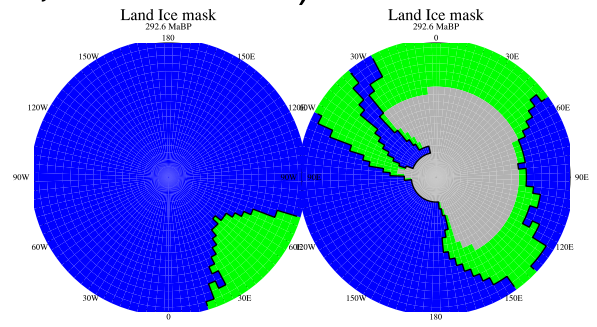

CO<sub>2</sub> = 495 ppmv

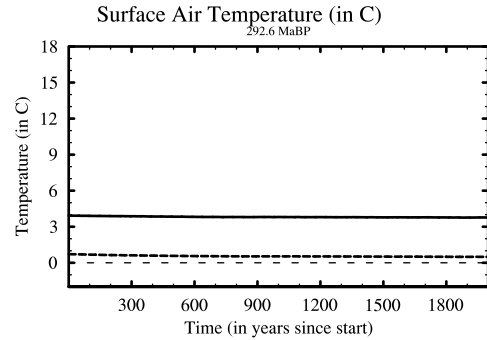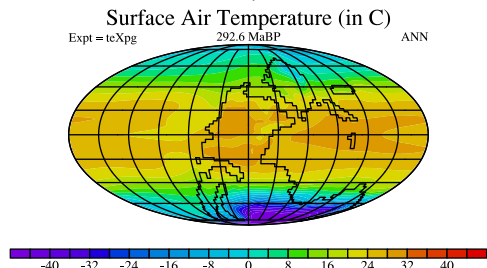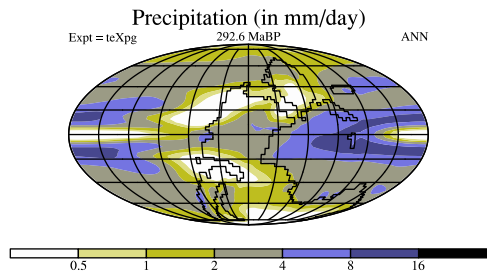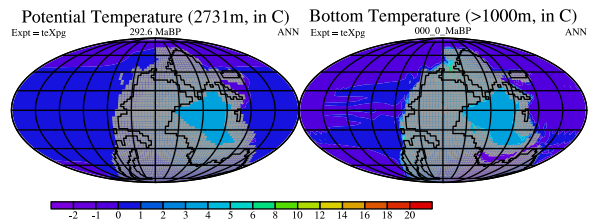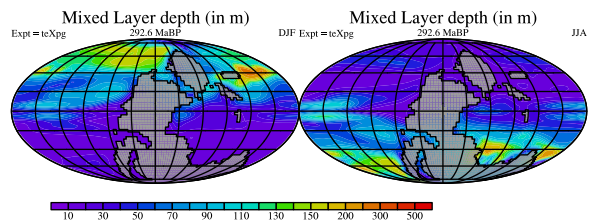

# Early Permian (Asselian, 297 Ma)

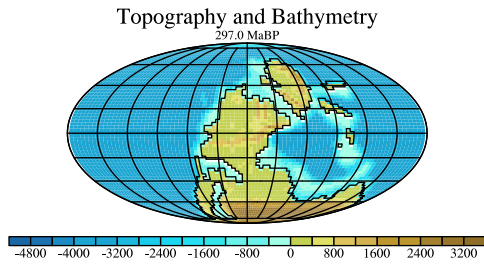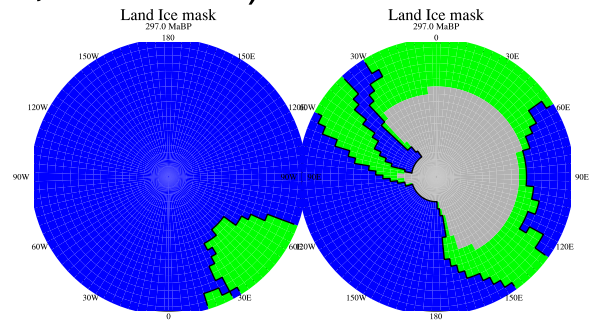

CO<sub>2</sub>= 500 ppmv

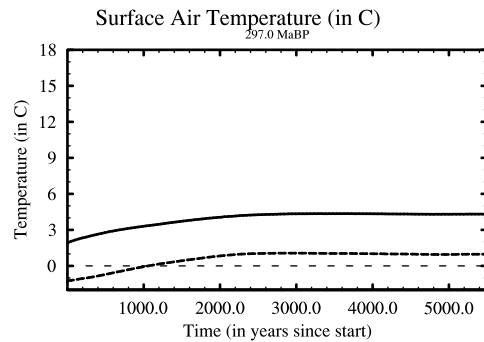

CO<sub>2</sub>= 445 ppmv

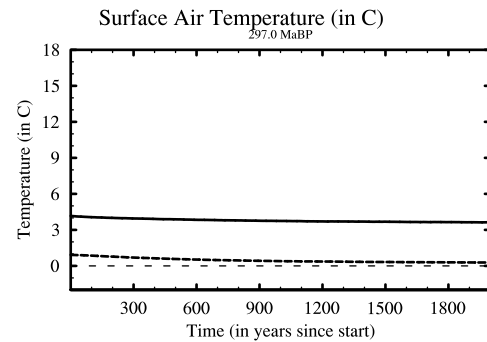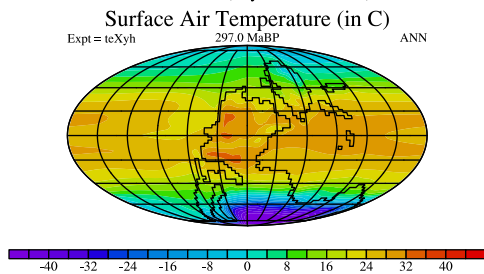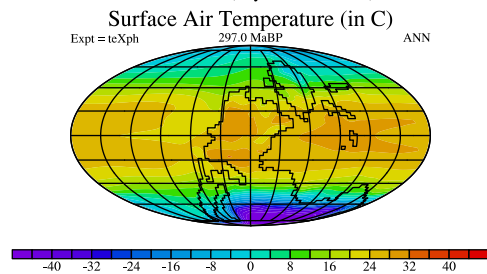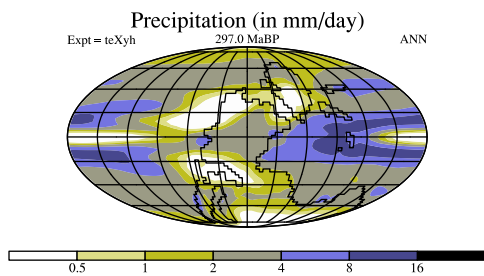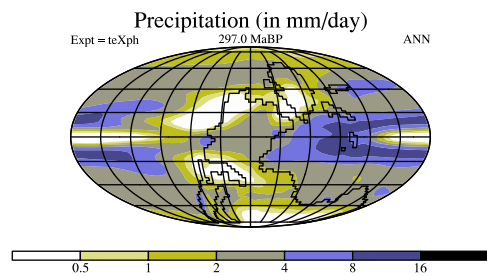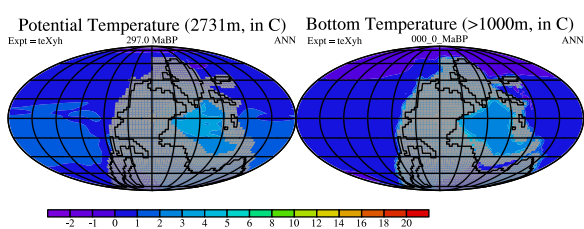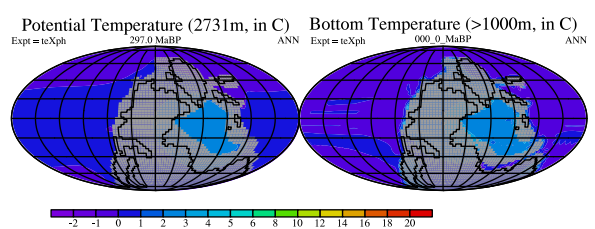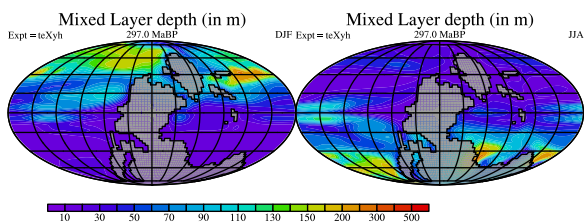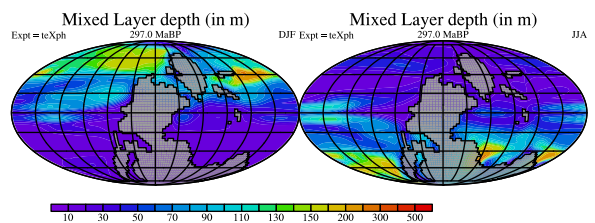

# Late Pennsylvanian (Gzhelian, 301.3 Ma)

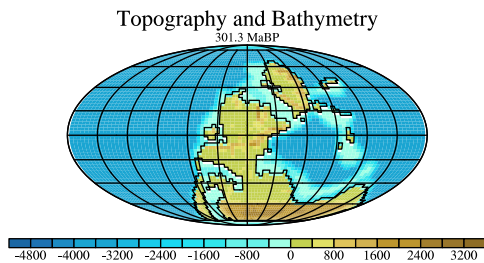

CO<sub>2</sub>= 510 ppmv

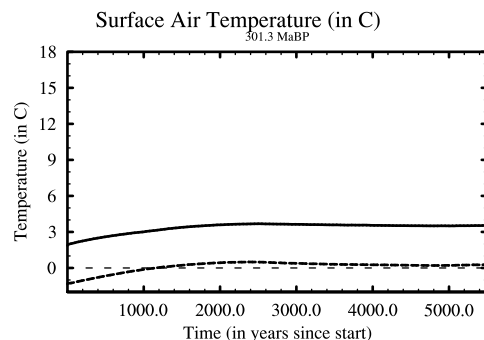

Surface Air Temperature (in C)  
Expt = teXyi 301.3 MaBP ANN

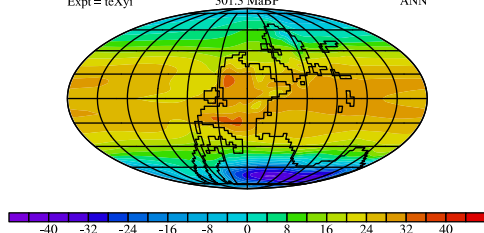

Precipitation (in mm/day)  
Expt = teXyi 301.3 MaBP ANN

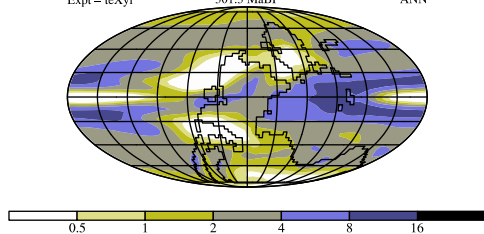

Potential Temperature (2731m, in C) Bottom Temperature (>1000m, in C)  
Expt = teXyi 301.3 MaBP ANN Expt = teXyi 000.0 MaBP ANN

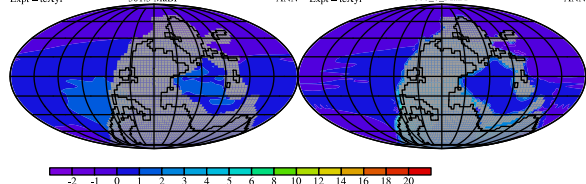

Mixed Layer depth (in m) Mixed Layer depth (in m)  
Expt = teXyi 301.3 MaBP DJF Expt = teXyi 301.3 MaBP JJA

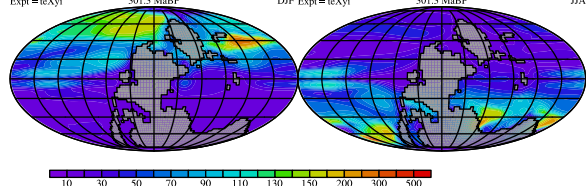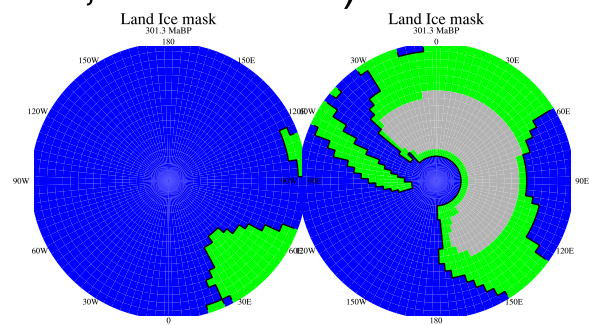

CO<sub>2</sub>= 393 ppmv

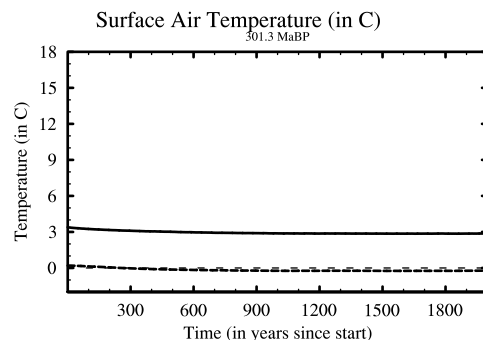

Surface Air Temperature (in C)  
Expt = teXpi 301.3 MaBP ANN

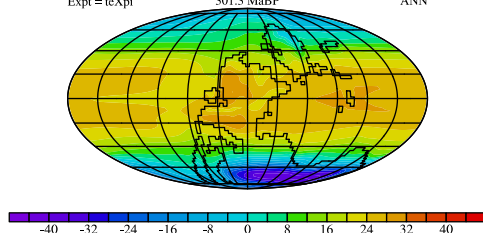

Precipitation (in mm/day)  
Expt = teXpi 301.3 MaBP ANN

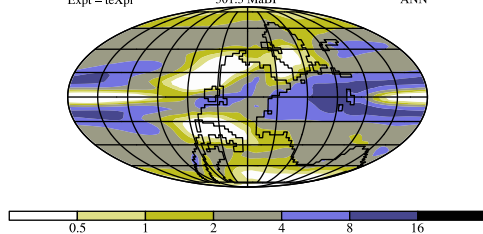

Potential Temperature (2731m, in C) Bottom Temperature (>1000m, in C)  
Expt = teXpi 301.3 MaBP ANN Expt = teXpi 000.0 MaBP ANN

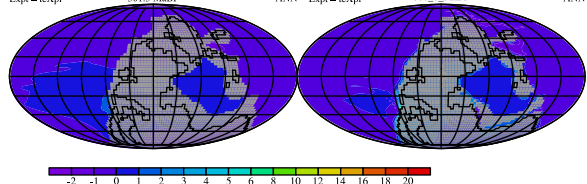

Mixed Layer depth (in m) Mixed Layer depth (in m)  
Expt = teXpi 301.3 MaBP DJF Expt = teXpi 301.3 MaBP JJA

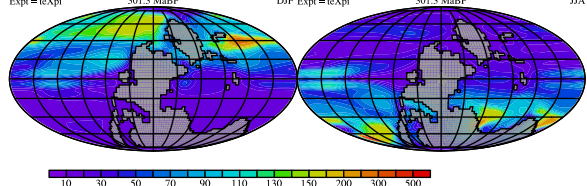



# Late Pennsylvanian (Kasimovian, 305.4 Ma)

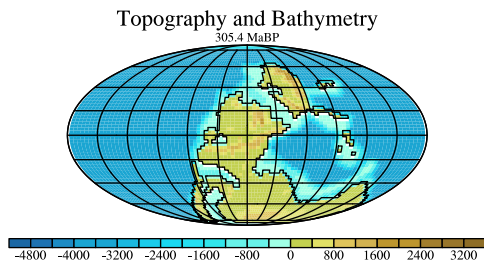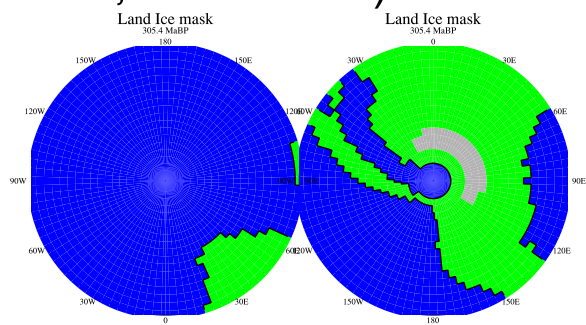

CO<sub>2</sub>= 520 ppmv

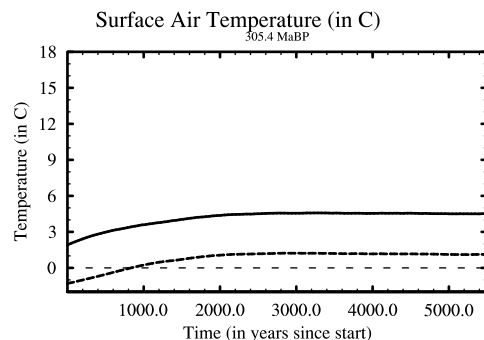

CO<sub>2</sub>= 358 ppmv

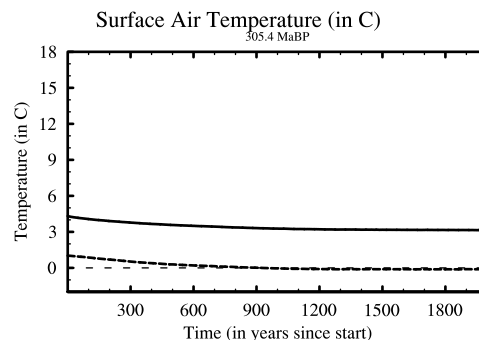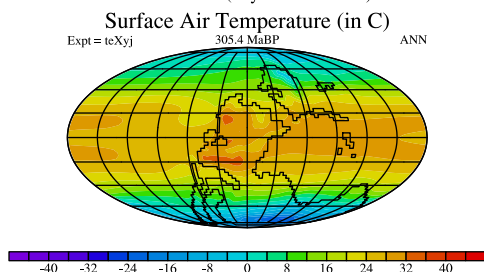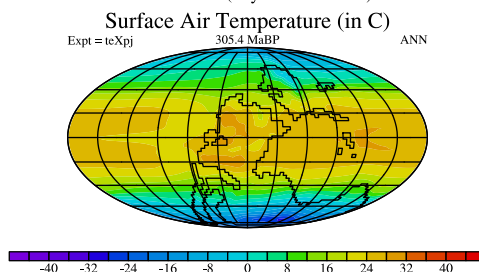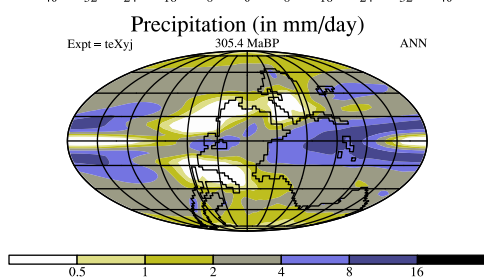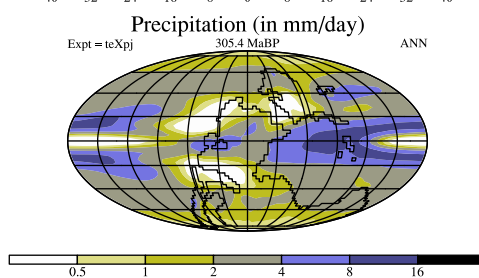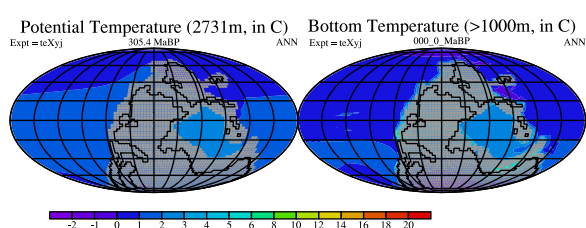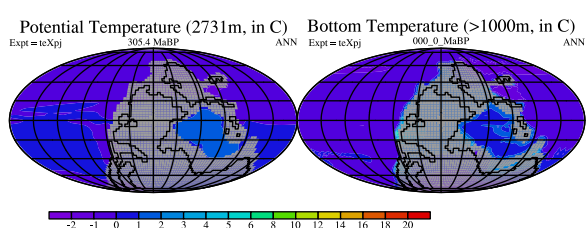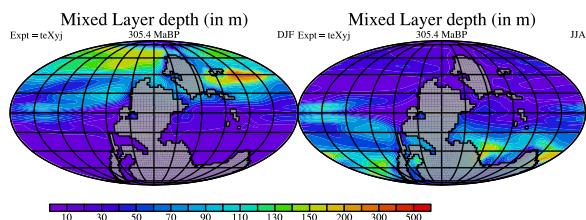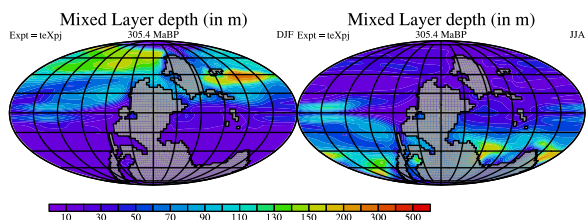

# Middle Pennsylvanian (Moscovian, 311.1 Ma)

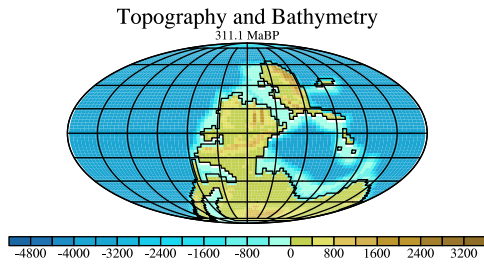

CO<sub>2</sub>= 534 ppmv

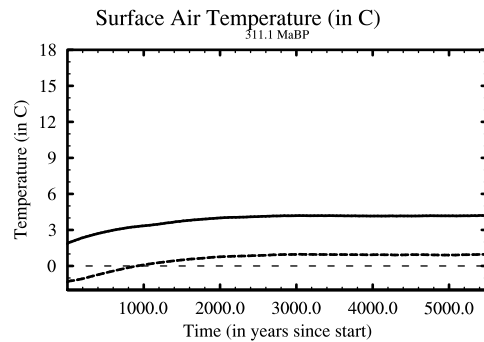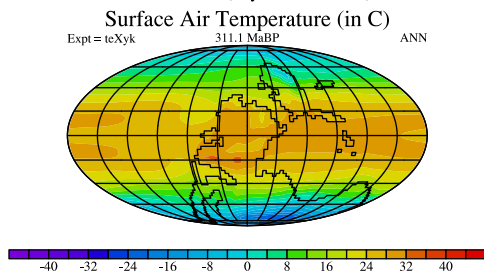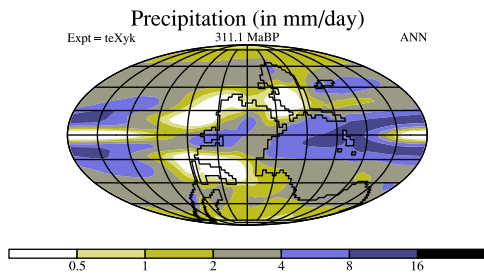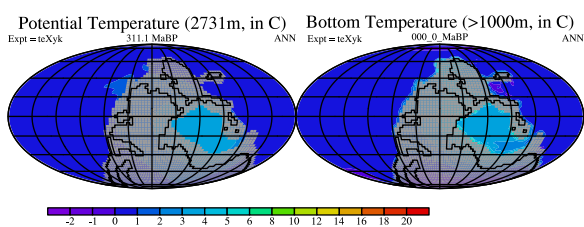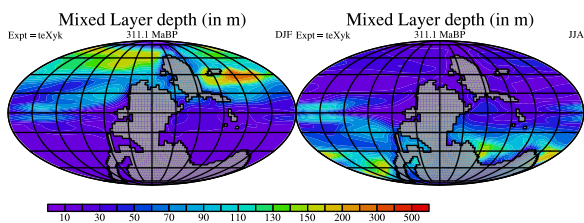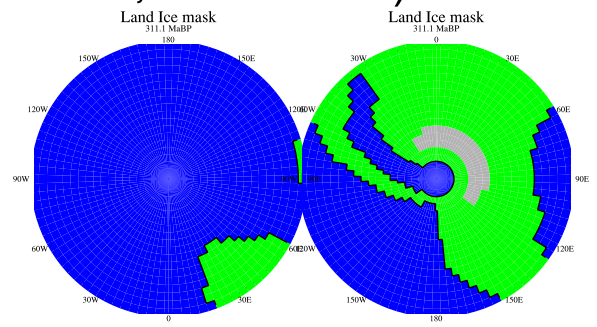

CO<sub>2</sub>= 338 ppmv

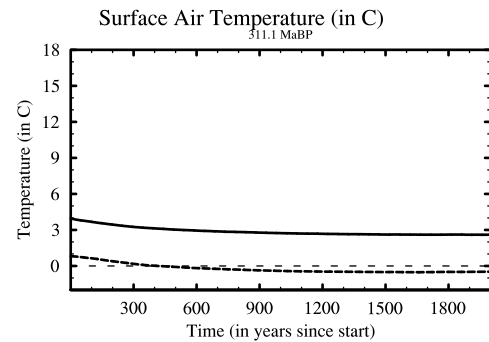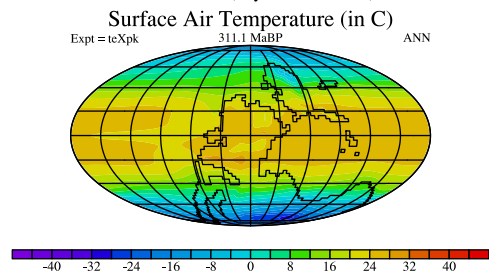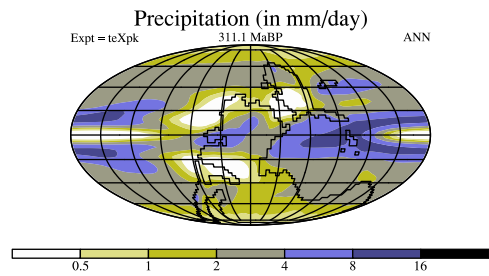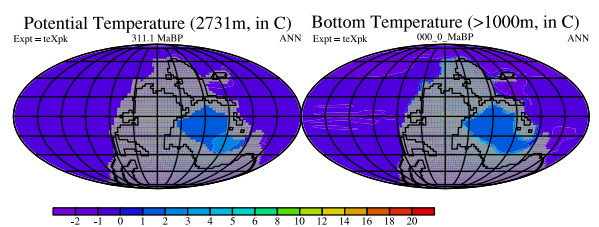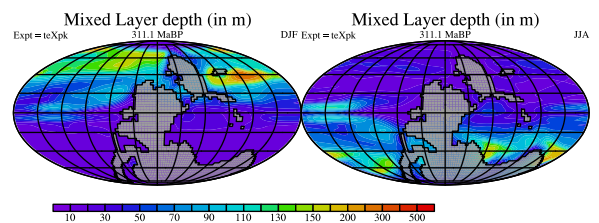

# Early/Middle Carboniferous (Baskirian/Moscovian boundary, 314.6 Ma)

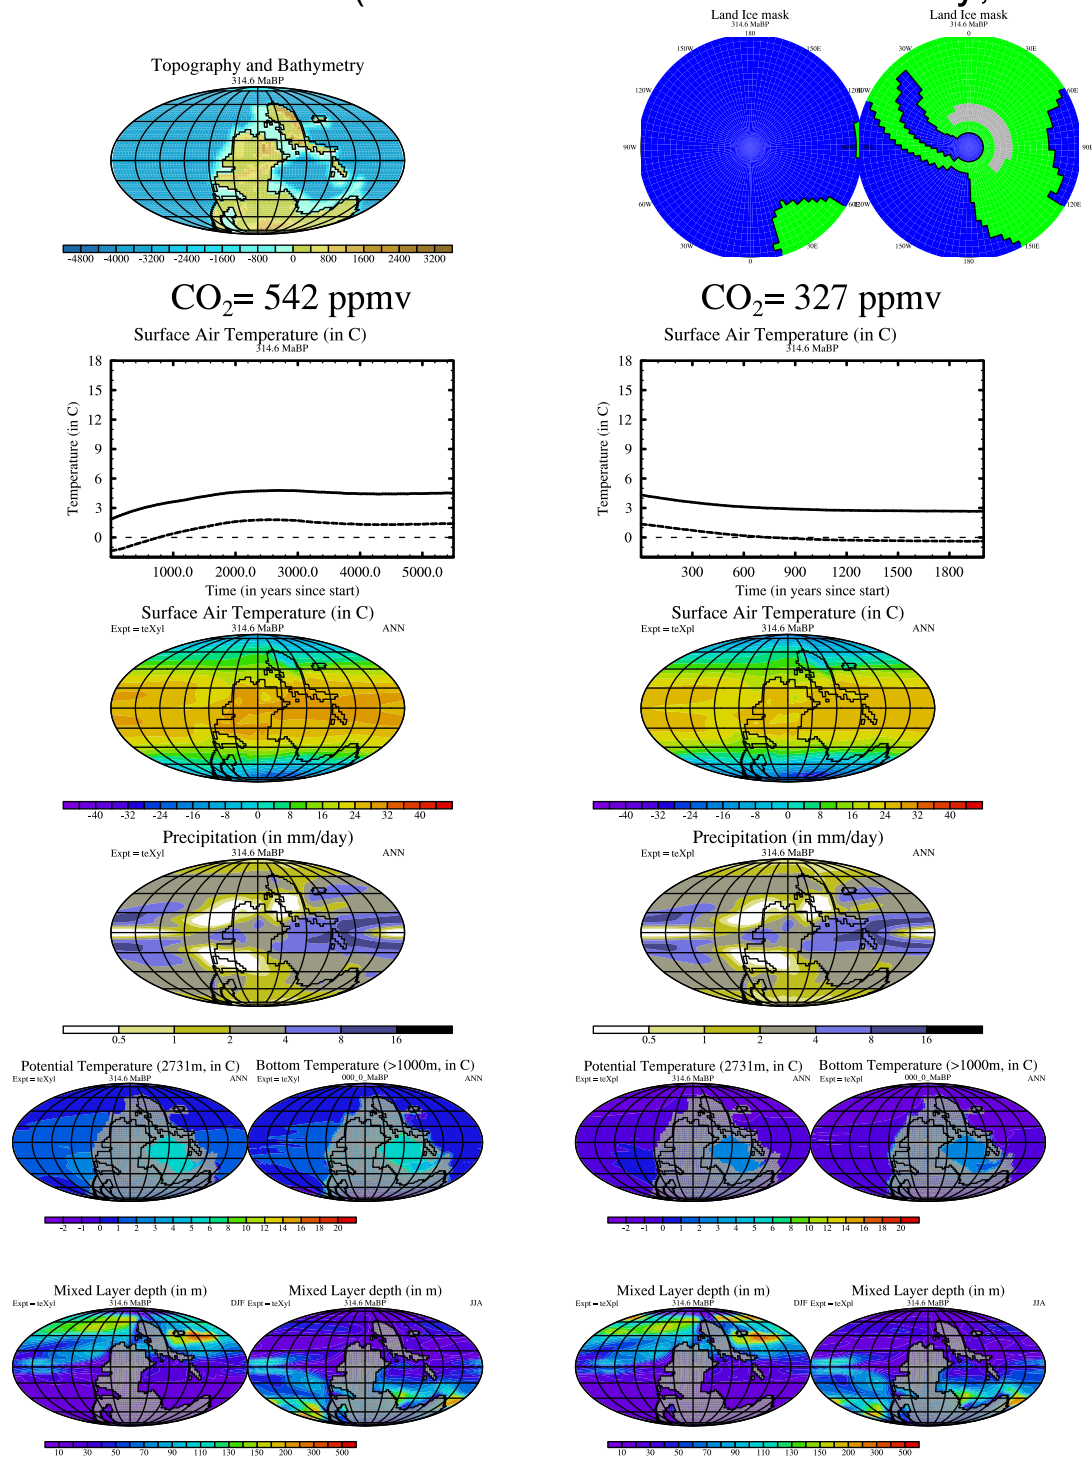



# Early Pennsylvanian (Bashkirian, 319.2 Ma)

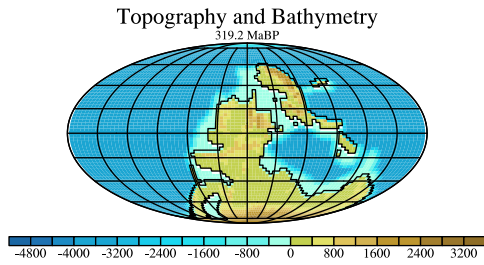

CO<sub>2</sub>= 553 ppmv

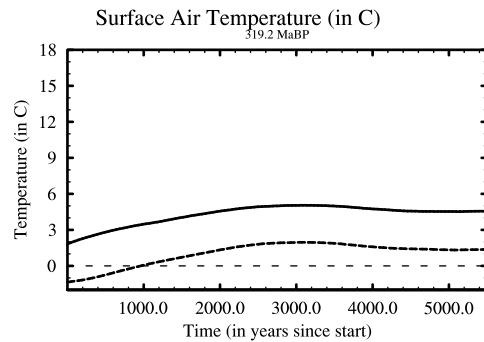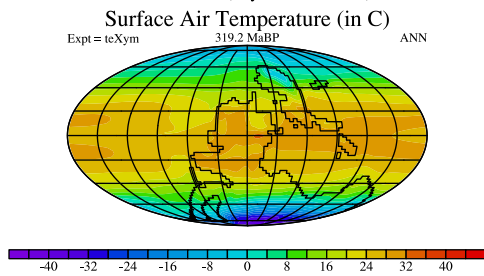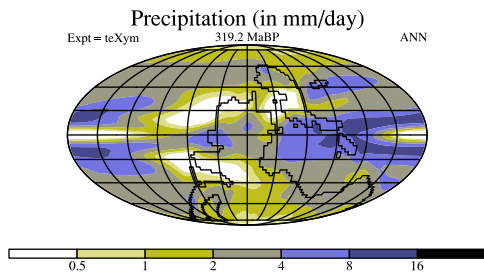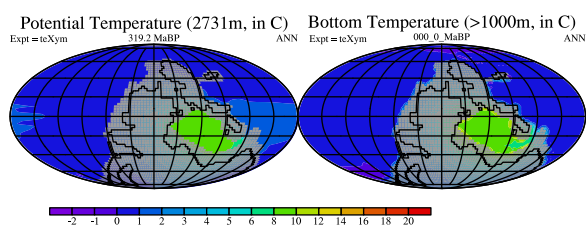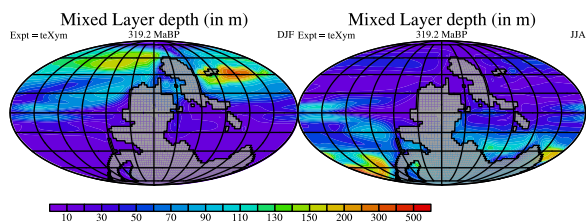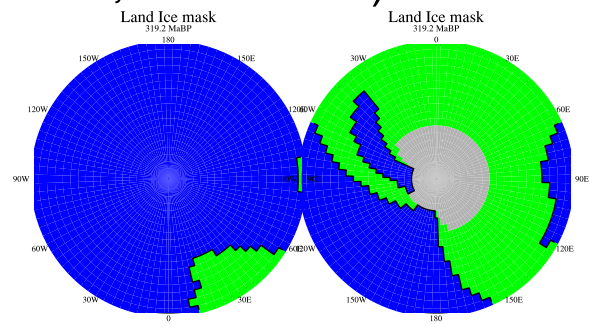

CO<sub>2</sub>= 328 ppmv

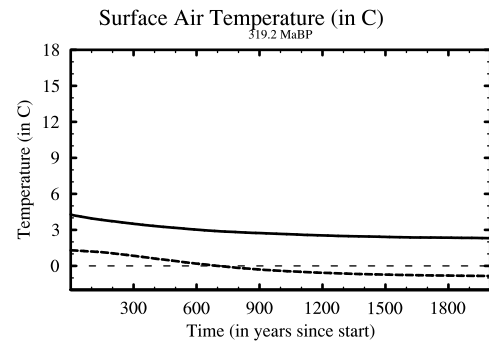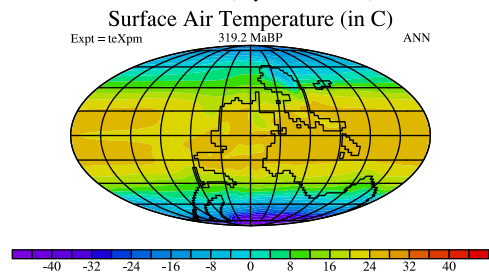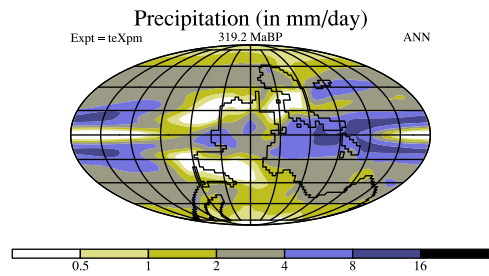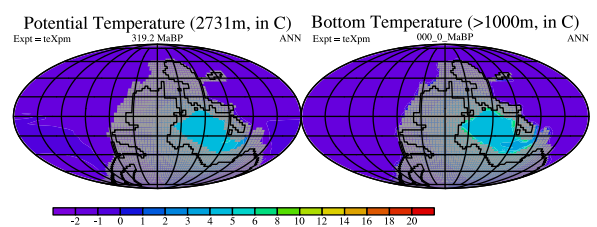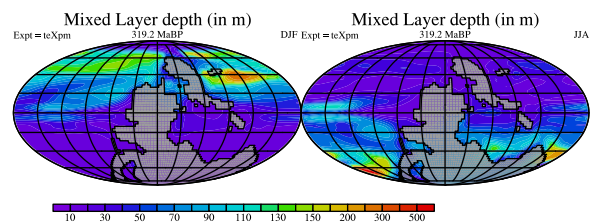

# Late Mississippian (Serpukhovian, 327 Ma)

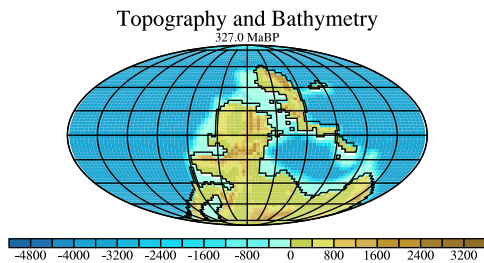

CO<sub>2</sub>= 571 ppmv

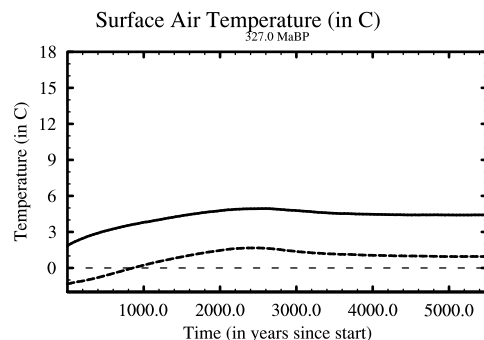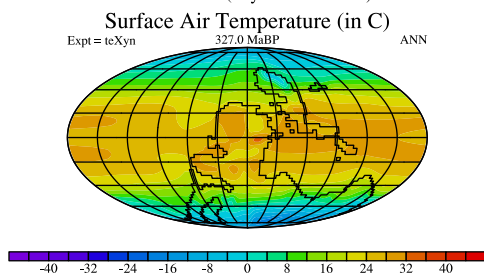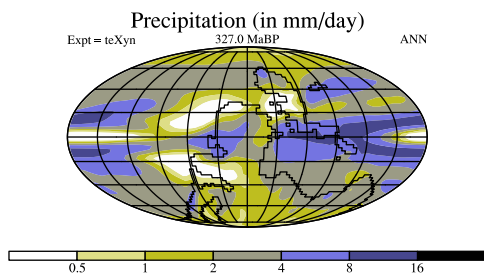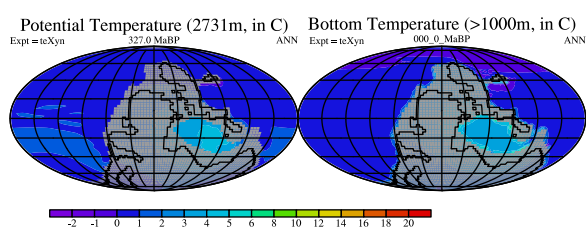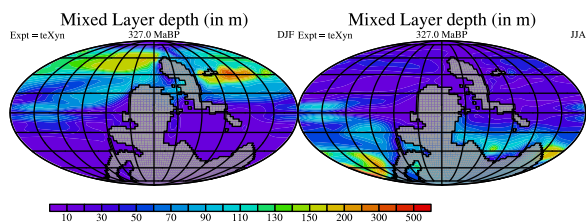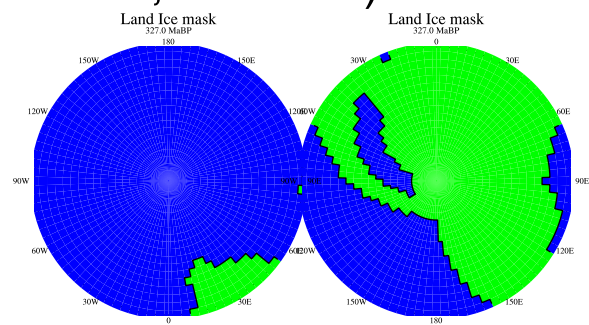

CO<sub>2</sub>= 317 ppmv

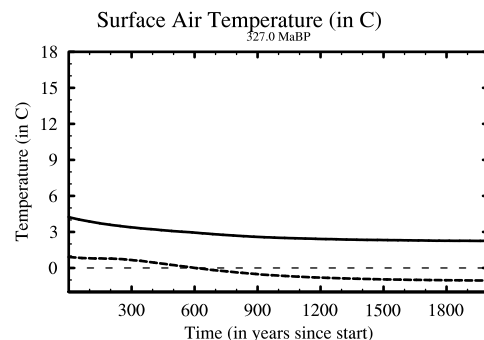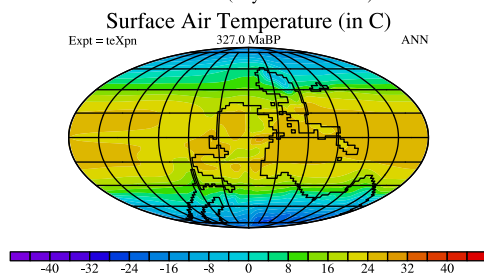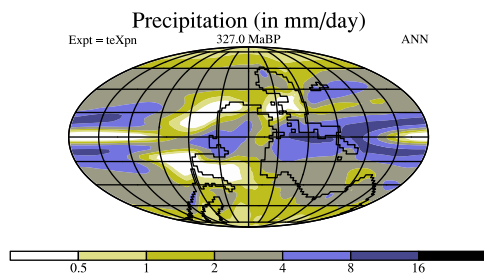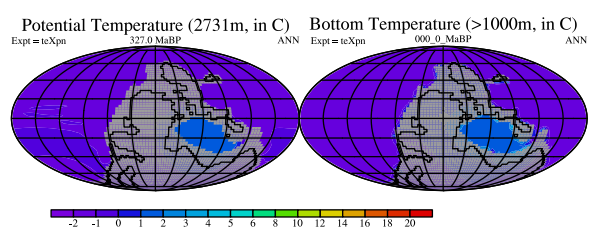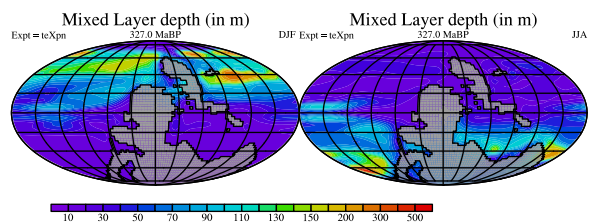

# Late Mississippian (Visean/Serpukhovian boundary, 330.9 Ma)

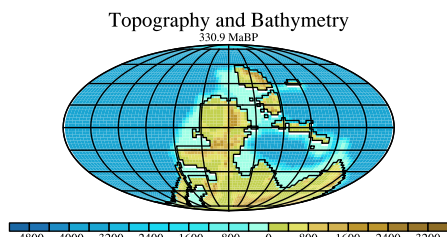

CO<sub>2</sub> = 581 ppmv

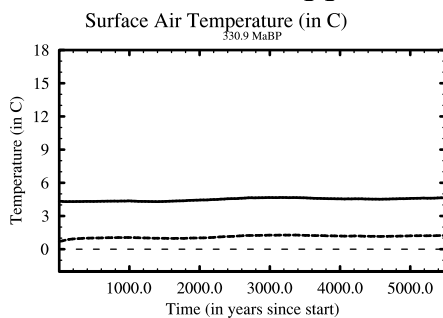

Surface Air Temperature (in C)  
Expt = tcXyo ANN

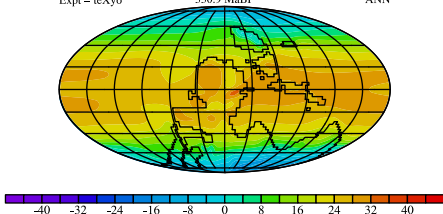

Precipitation (in mm/day)  
Expt = tcXyo ANN

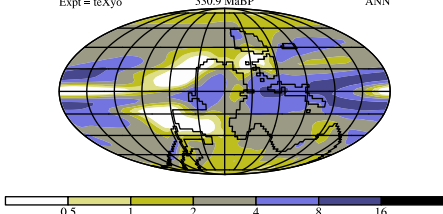

Potential Temperature (2731m, in C) Bottom Temperature (>1000m, in C)  
Expt = tcXyo ANN Expt = tcXyo ANN

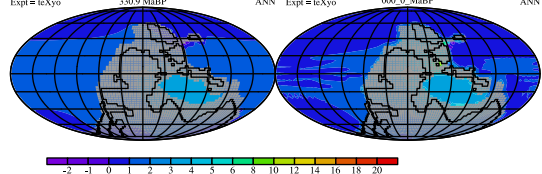

Mixed Layer depth (in m) Mixed Layer depth (in m)  
Expt = tcXyo ANN Expt = tcXyo ANN

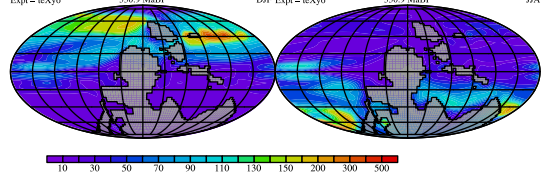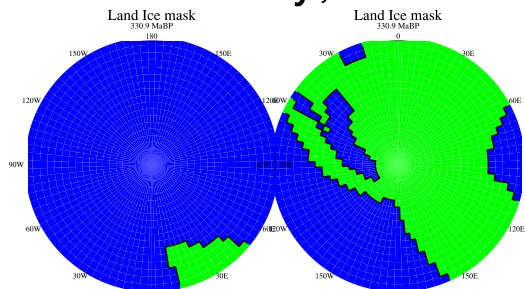

CO<sub>2</sub> = 296 ppmv

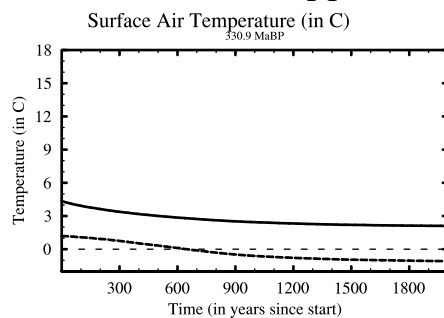

Surface Air Temperature (in C)  
Expt = tcXpo ANN

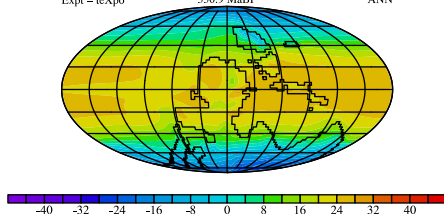

Precipitation (in mm/day)  
Expt = tcXpo ANN

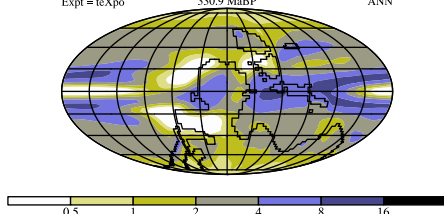

Potential Temperature (2731m, in C) Bottom Temperature (>1000m, in C)  
Expt = tcXpo ANN Expt = tcXpo ANN

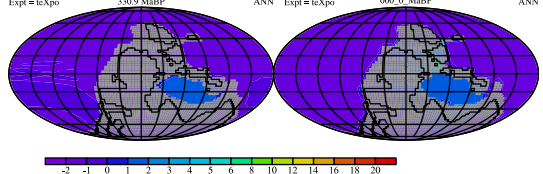

Mixed Layer depth (in m) Mixed Layer depth (in m)  
Expt = tcXpo ANN Expt = tcXpo ANN

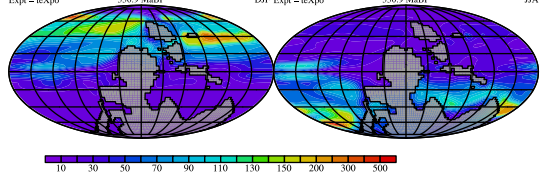



# Middle Mississippian (late Visean, 333 Ma)

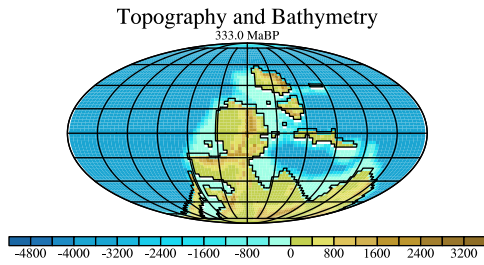

CO<sub>2</sub>= 586 ppmv

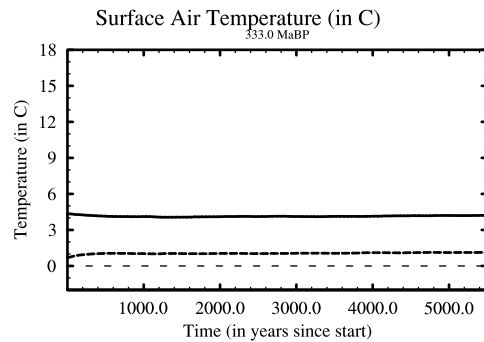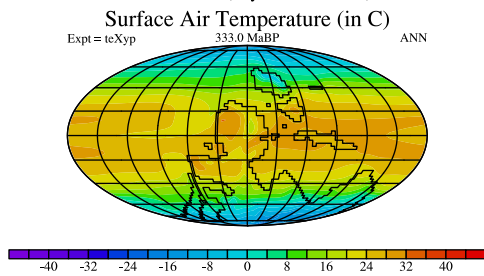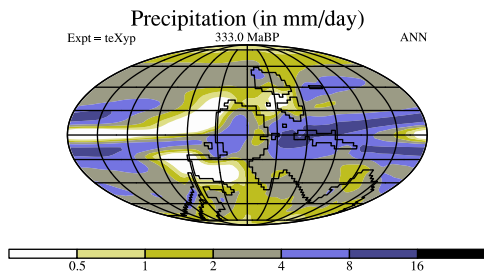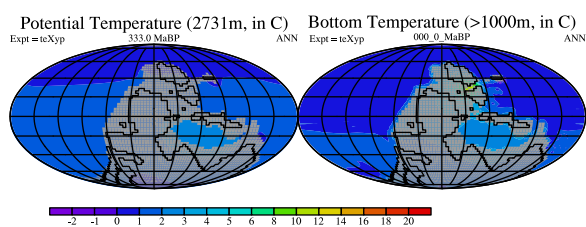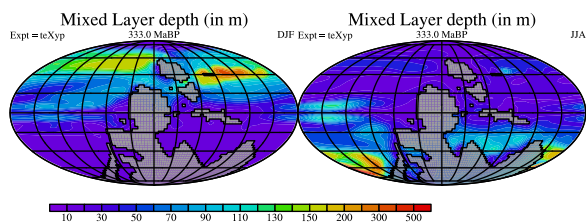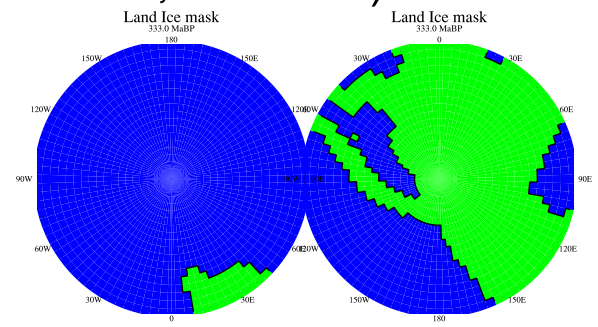

CO<sub>2</sub>= 263 ppmv

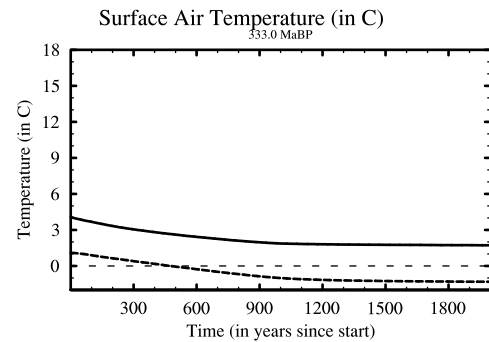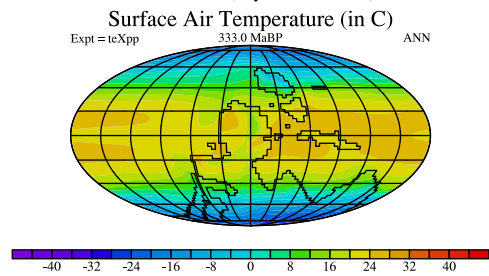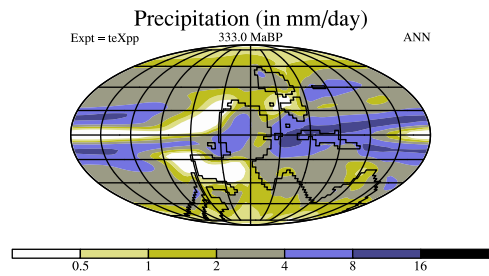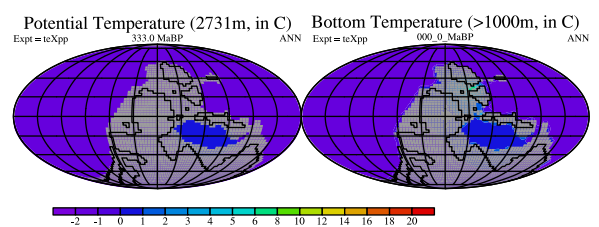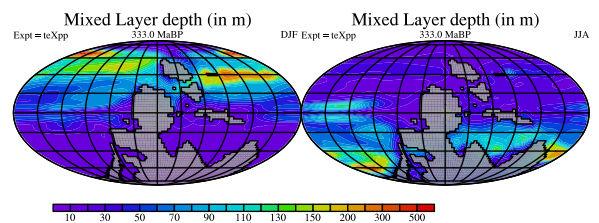

# Middle Mississippian (middle Visean, 338.8 Ma)

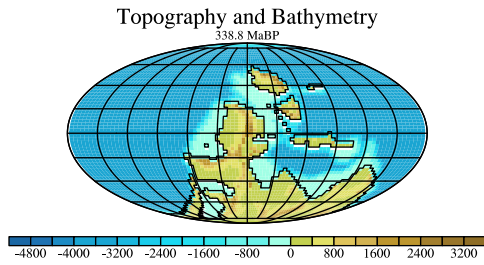

CO<sub>2</sub>= 600 ppmv

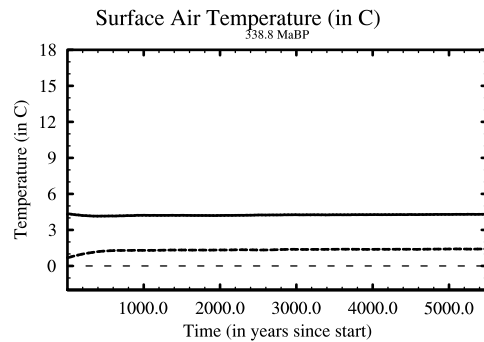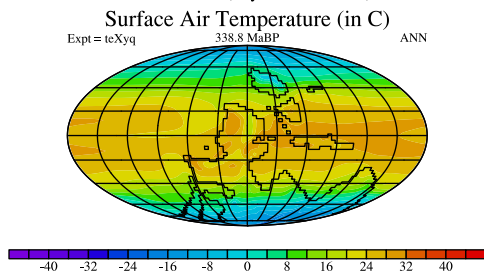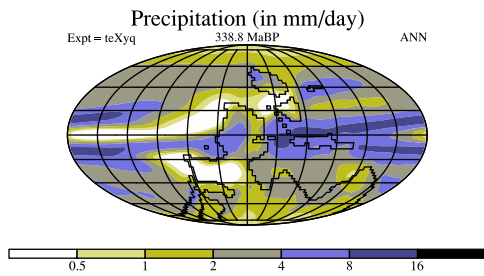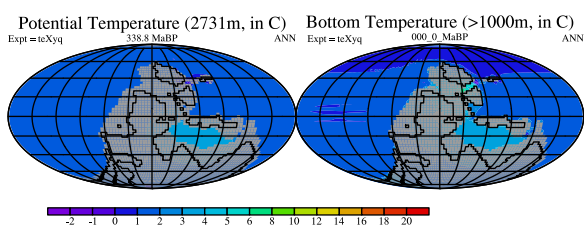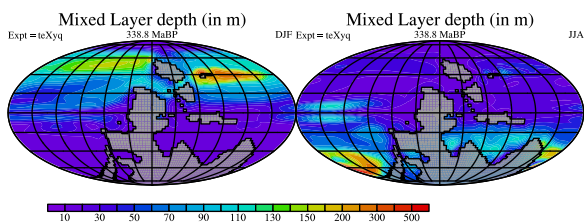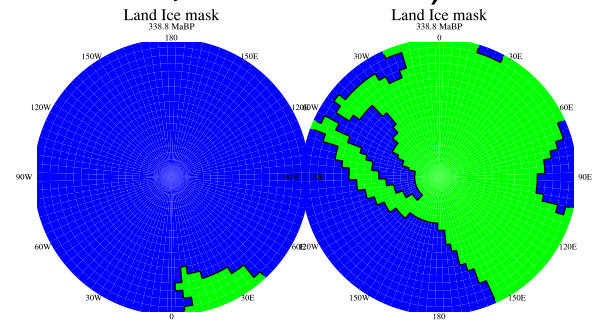

CO<sub>2</sub>= 233 ppmv

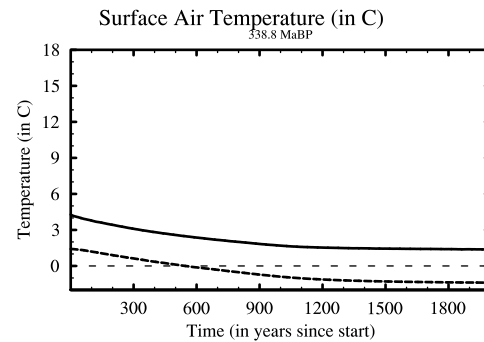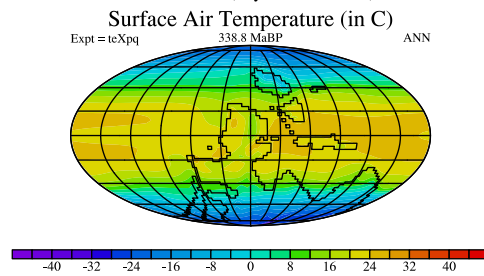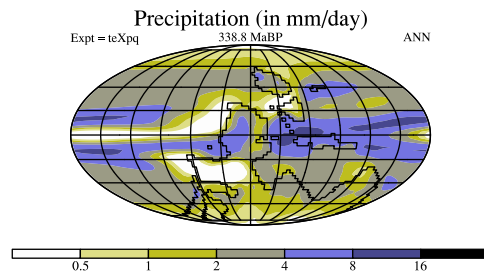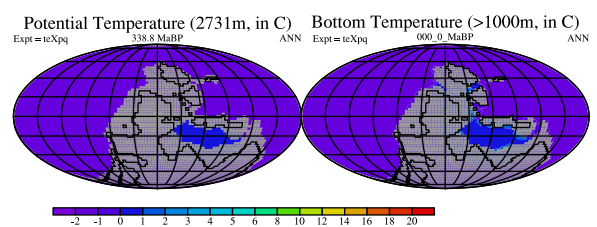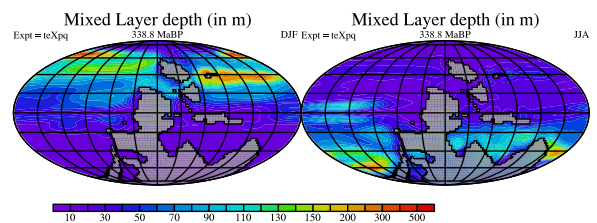

# Middle Mississippian (early Visean, 344 Ma)

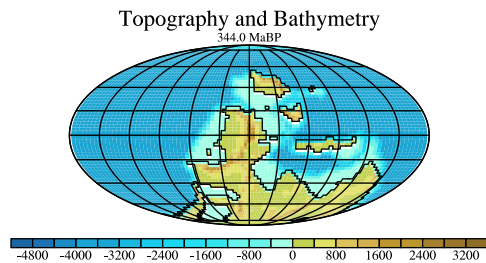

CO<sub>2</sub>= 653 ppmv

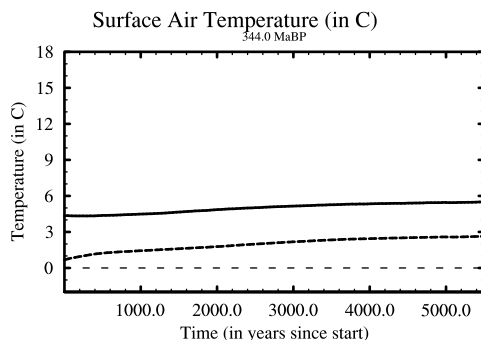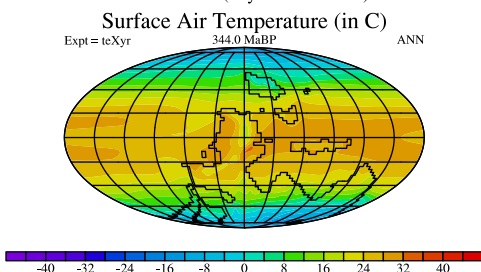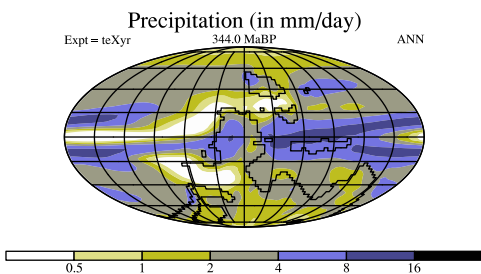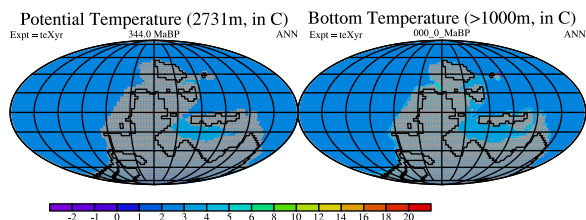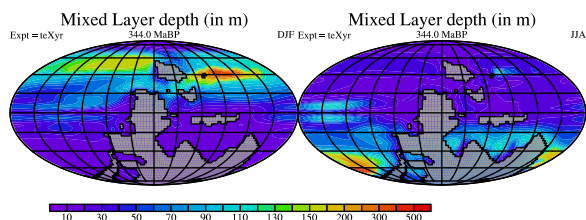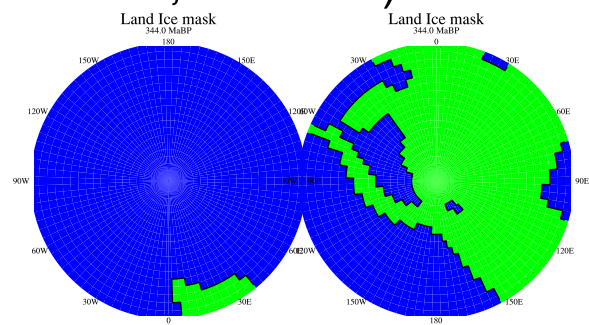

CO<sub>2</sub>= 565 ppmv

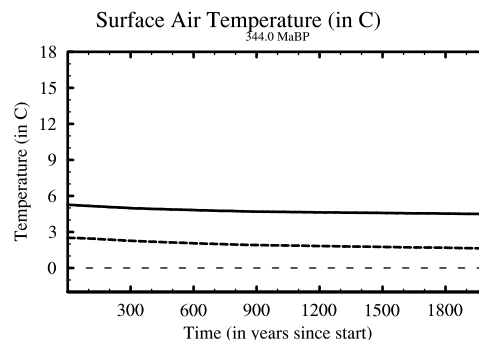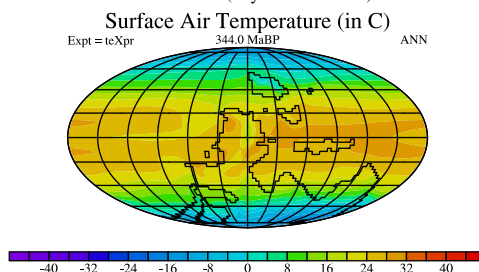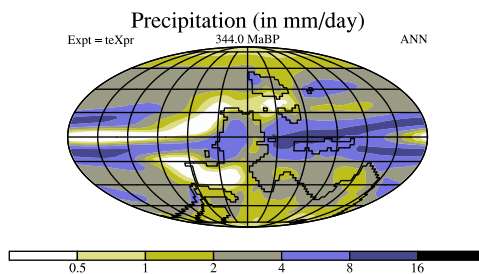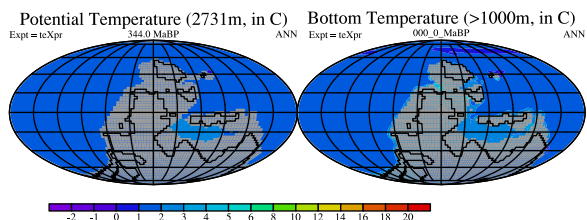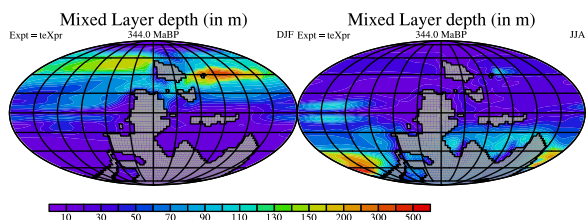



# Early Mississippian (late Tournaisian, 349 Ma)

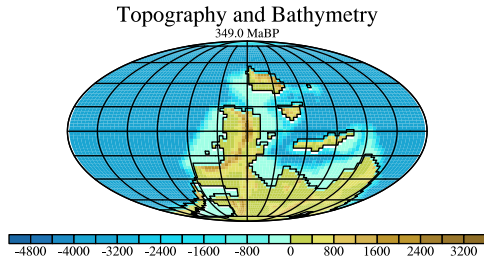

CO<sub>2</sub> = 705 ppmv

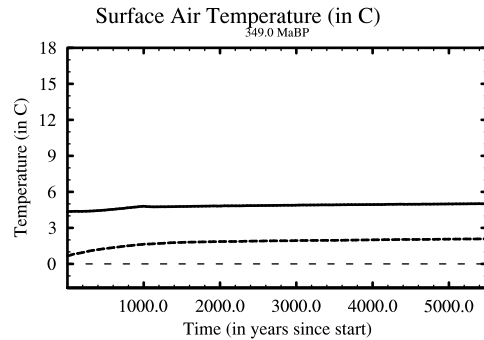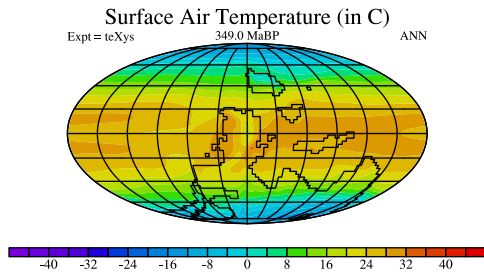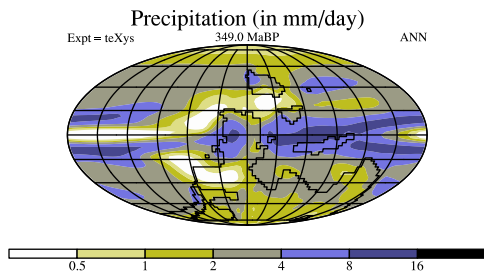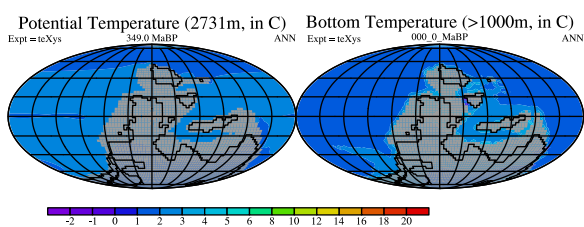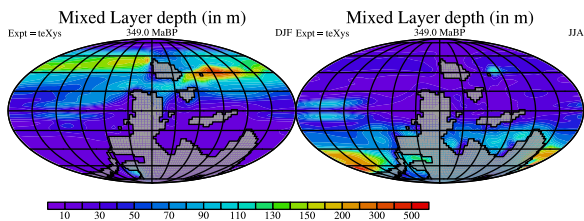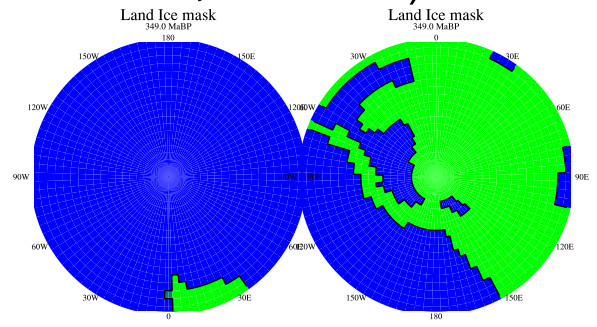

CO<sub>2</sub> = 645 ppmv

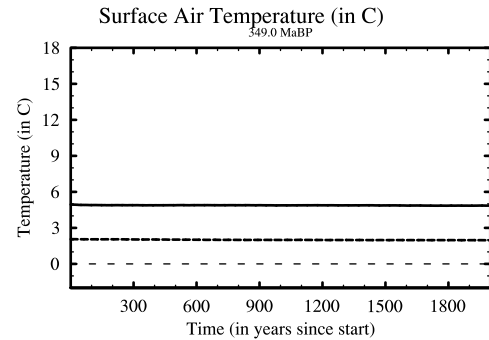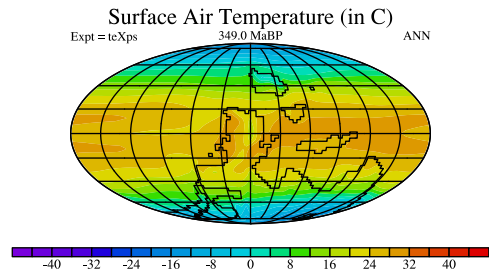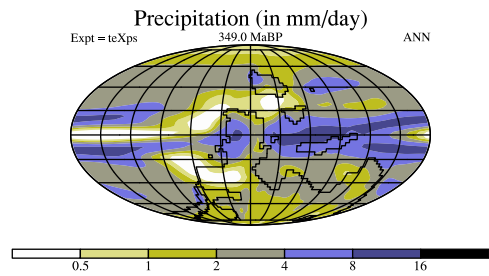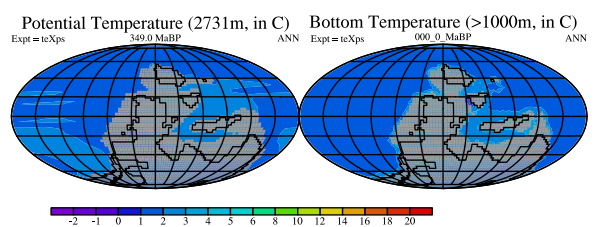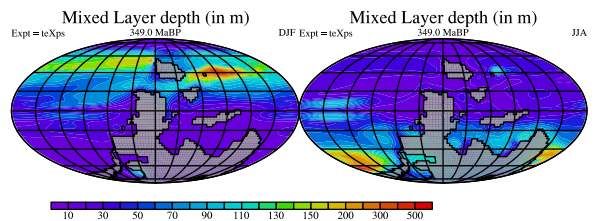

# Early Mississippian (early Tournaisian, 354 Ma)

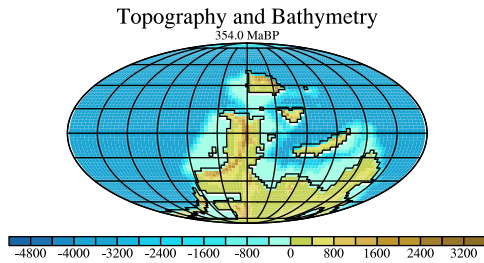

CO<sub>2</sub> = 758 ppmv

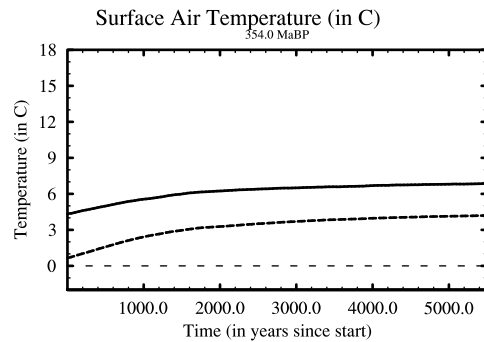

Surface Air Temperature (in C)  
354.0 MaBP

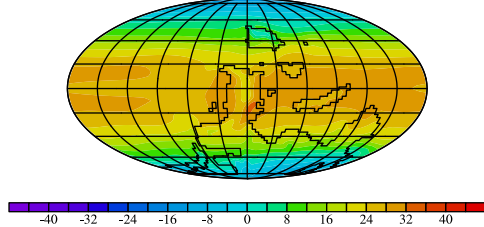

Precipitation (in mm/day)  
354.0 MaBP

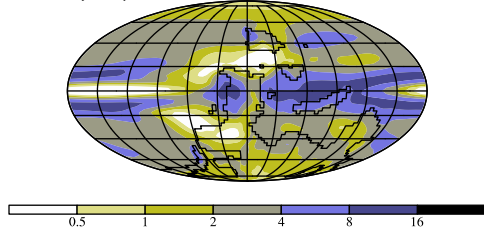

Potential Temperature (2731m, in C) Bottom Temperature (>1000m, in C)  
354.0 MaBP ANN Expt = teXyt 000.0 MaBP ANN

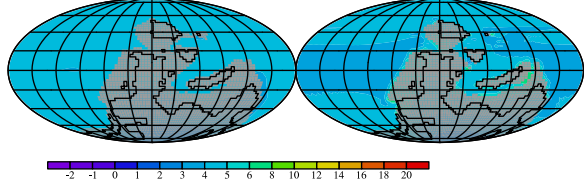

Mixed Layer depth (in m) Mixed Layer depth (in m)  
Expt = teXyt 354.0 MaBP DJF Expt = teXyt 354.0 MaBP JJA

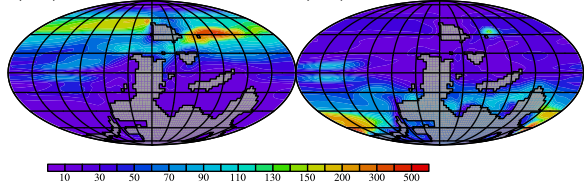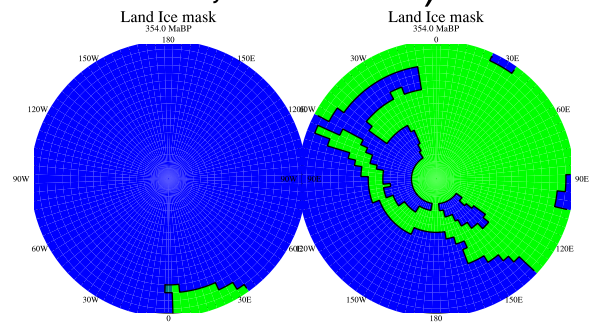

CO<sub>2</sub> = 589 ppmv

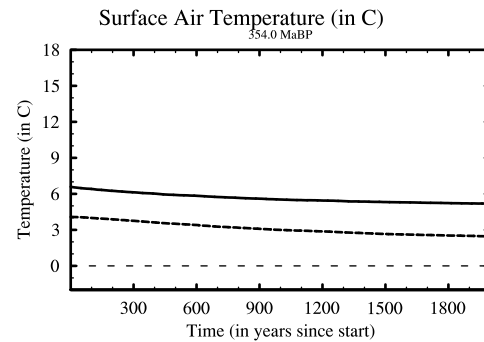

Surface Air Temperature (in C)  
354.0 MaBP

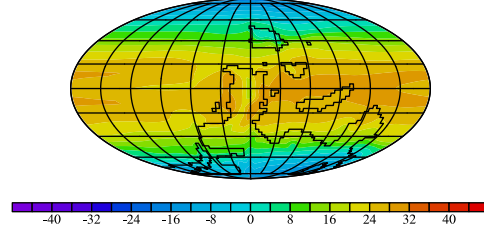

Precipitation (in mm/day)  
354.0 MaBP

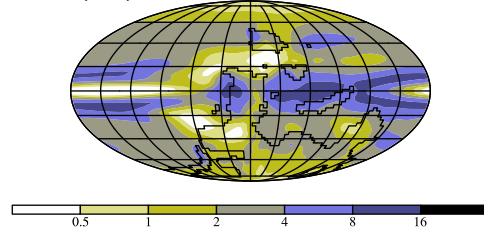

Potential Temperature (2731m, in C) Bottom Temperature (>1000m, in C)  
354.0 MaBP ANN Expt = teXpt 000.0 MaBP ANN

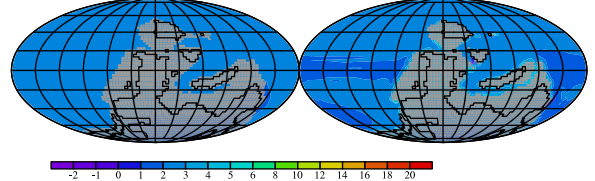

Mixed Layer depth (in m) Mixed Layer depth (in m)  
Expt = teXpt 354.0 MaBP DJF Expt = teXpt 354.0 MaBP JJA

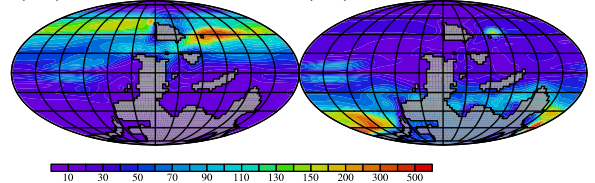

# Devono-Carboniferous Boundary (358.9 Ma)

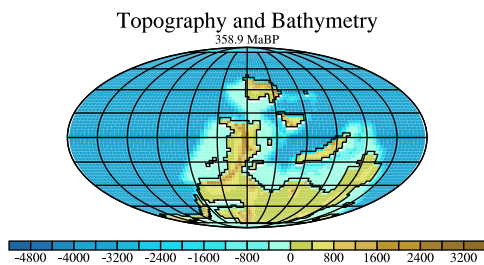

CO<sub>2</sub> = 809 ppmv

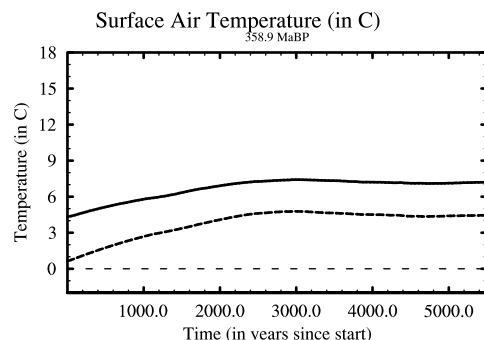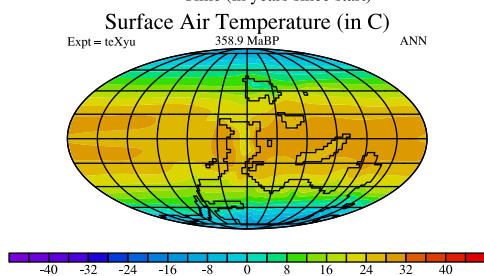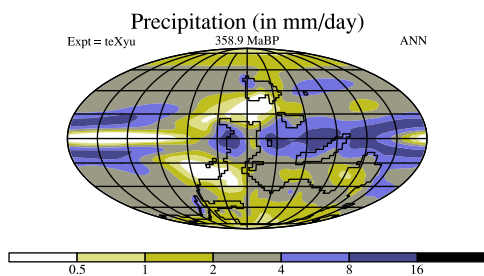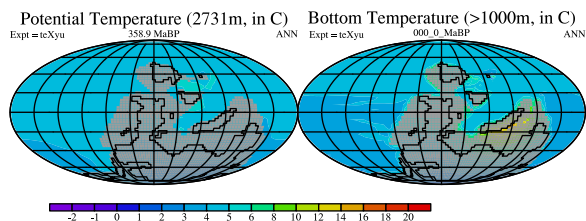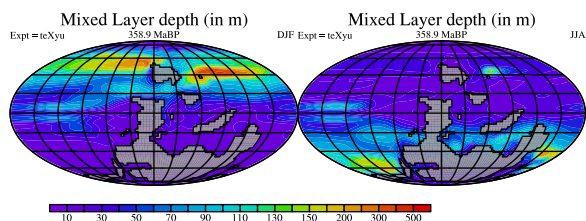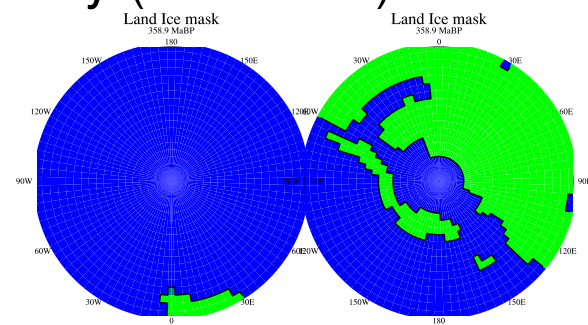

CO<sub>2</sub> = 587 ppmv

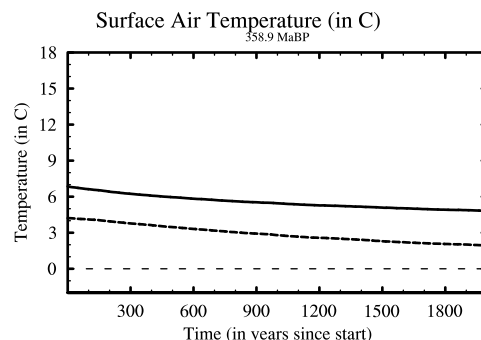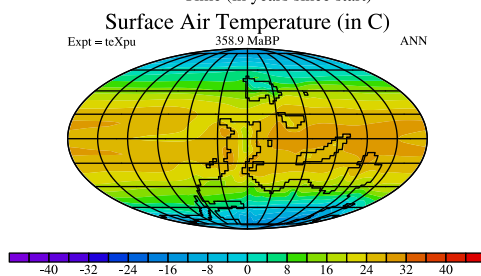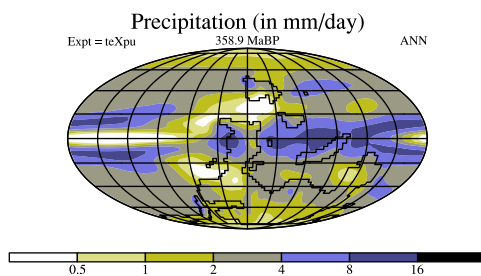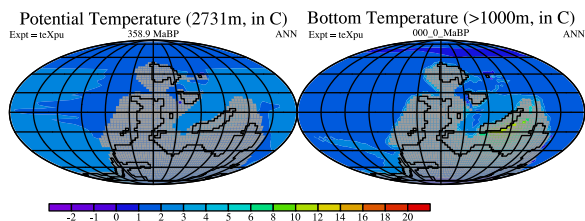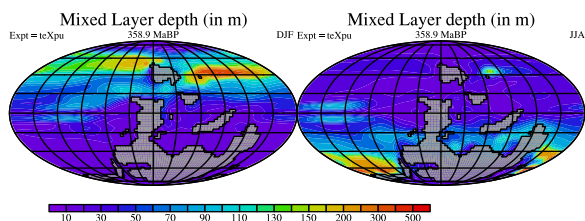



# Late Devonian (middle Famennian, 365.6 Ma)

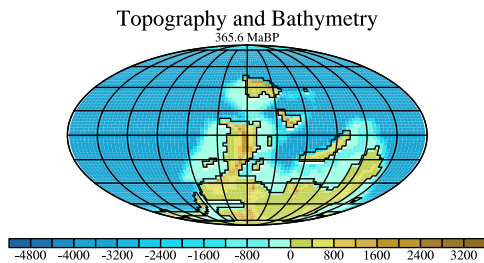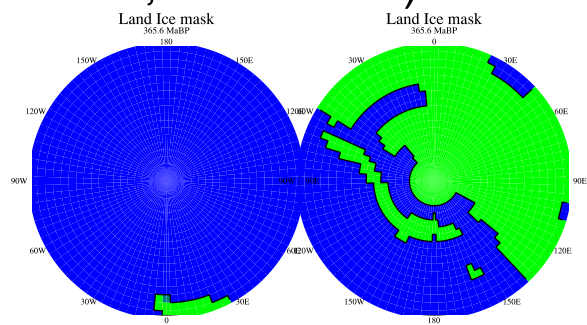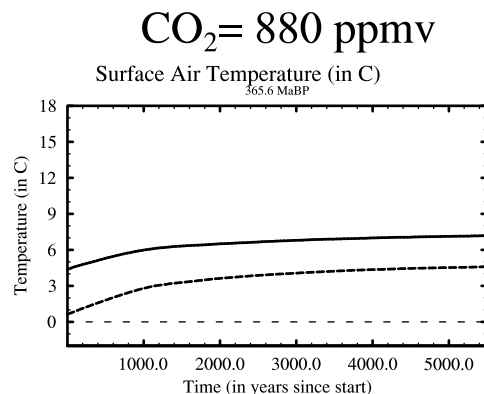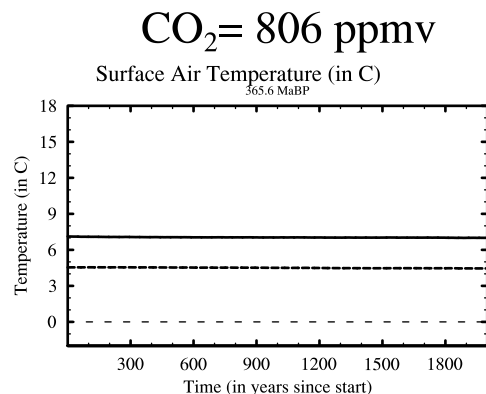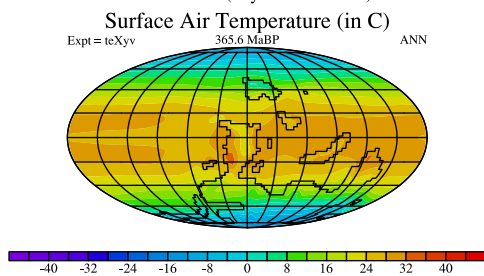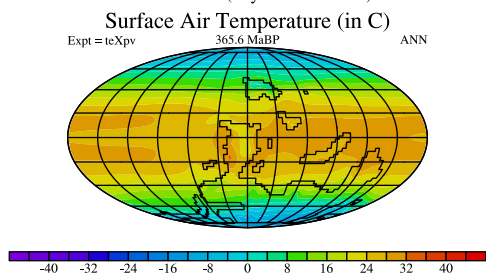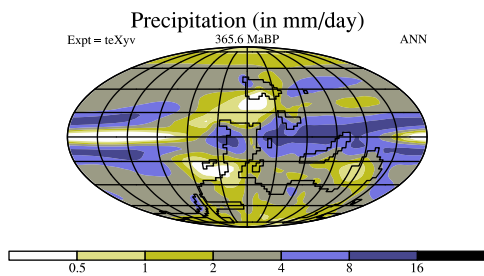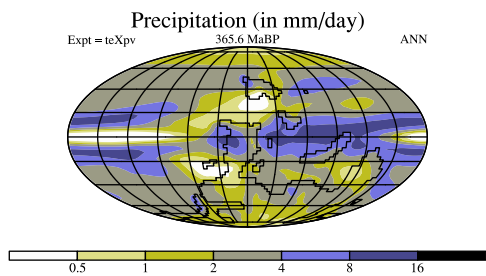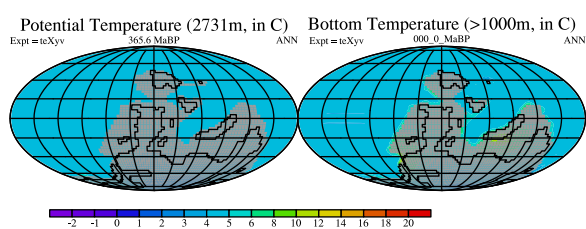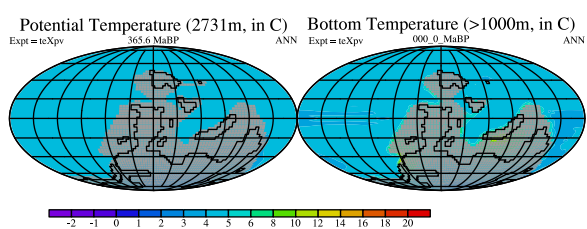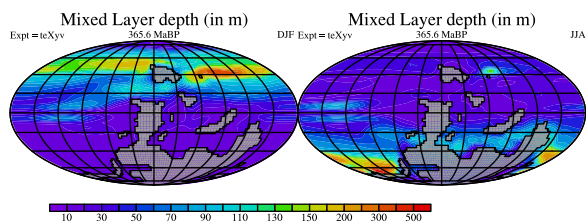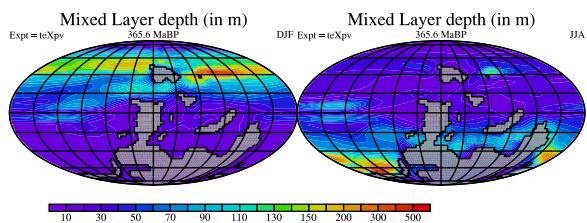

# Late Devonian (early Famennian, 370 Ma)

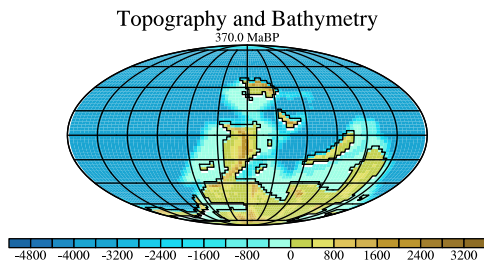

CO<sub>2</sub>= 926 ppmv

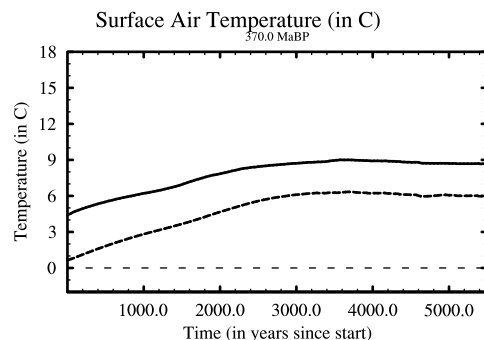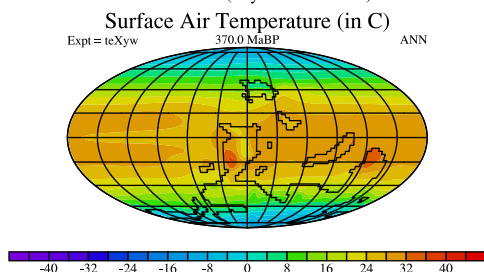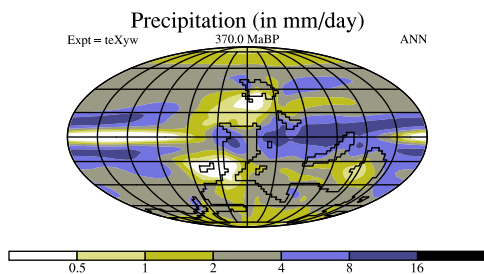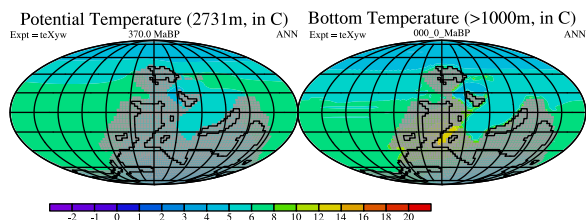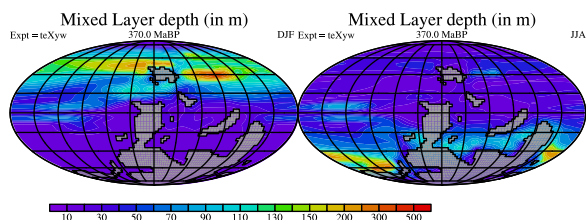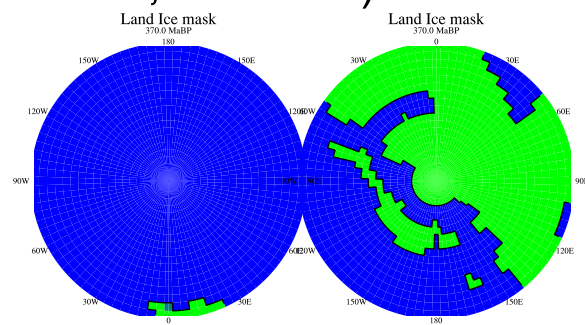

CO<sub>2</sub>= 811 ppmv

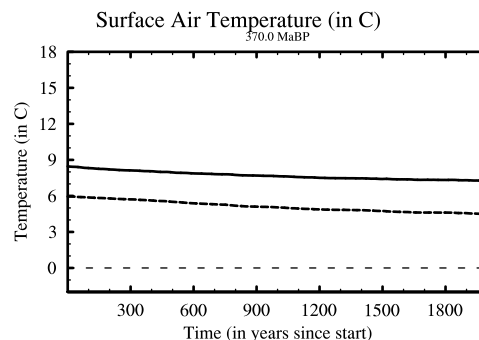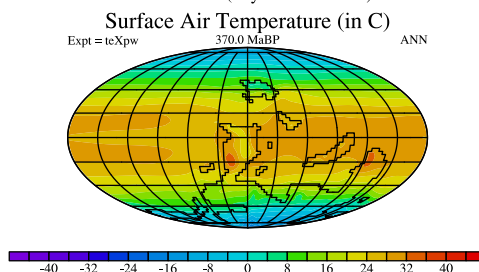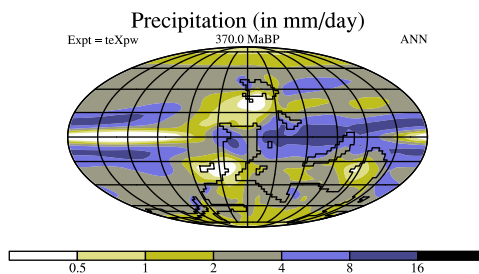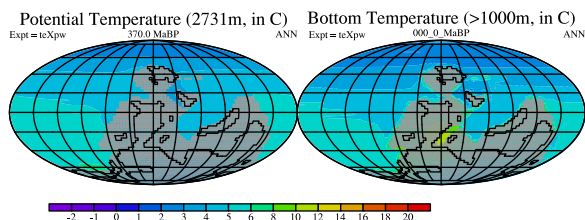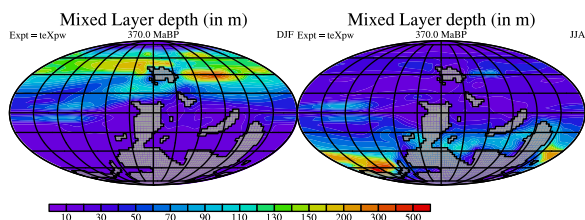

# Late Devonian (late Frasnian, 375 Ma)

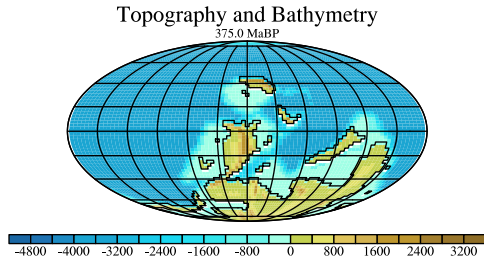

CO<sub>2</sub>= 979 ppmv

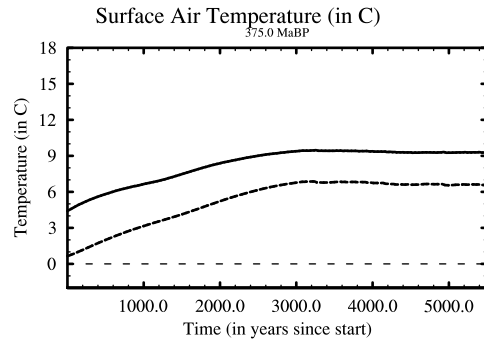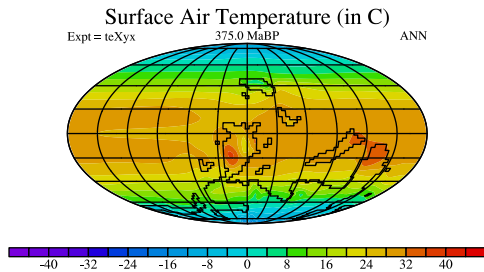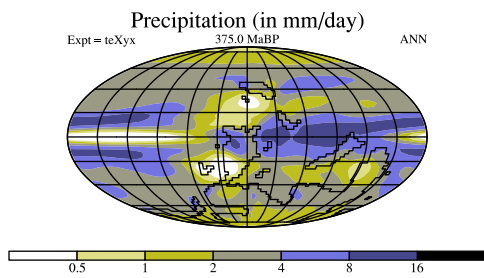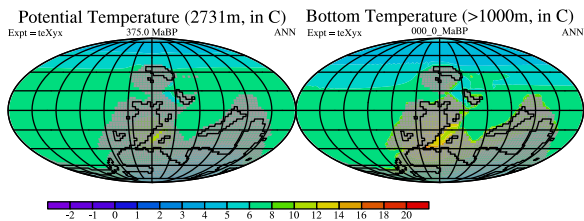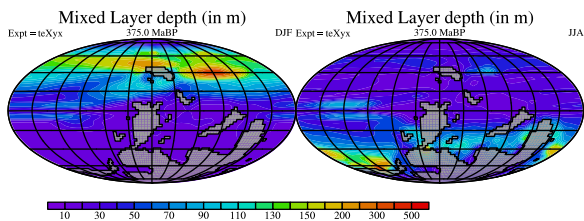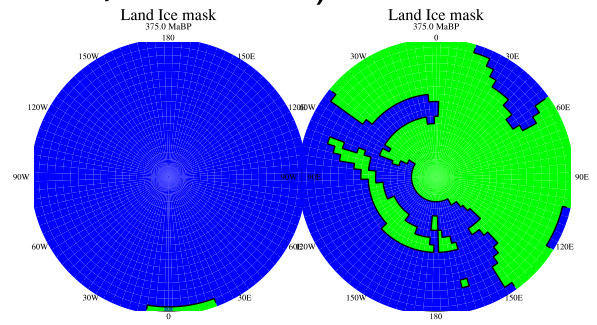

CO<sub>2</sub>= 1052 ppmv

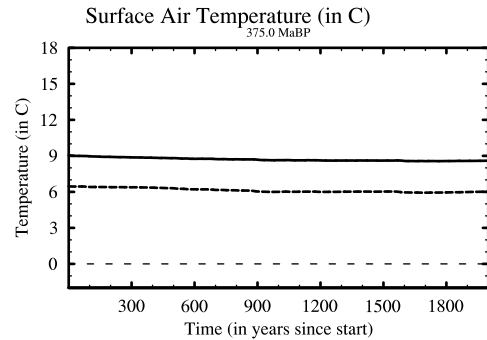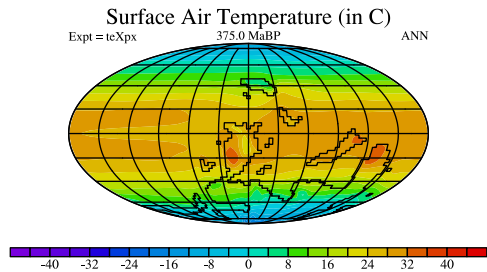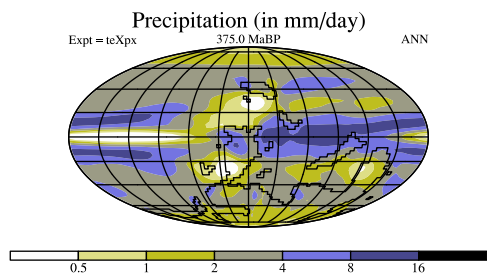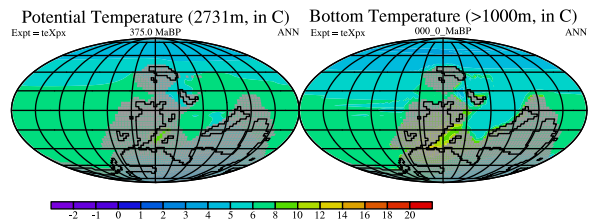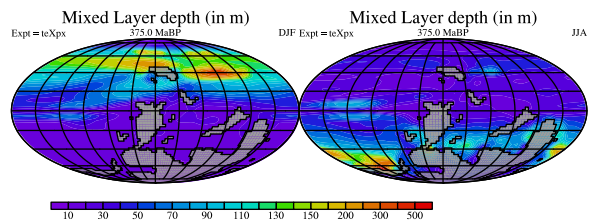



# Late Devonian (early Frasnian, 380 Ma)

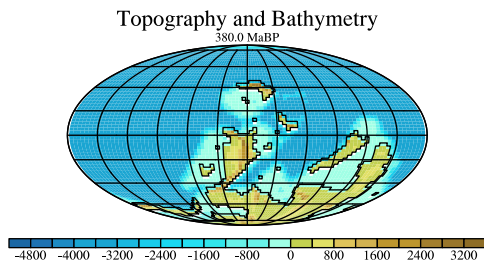

CO<sub>2</sub> = 1029 ppmv

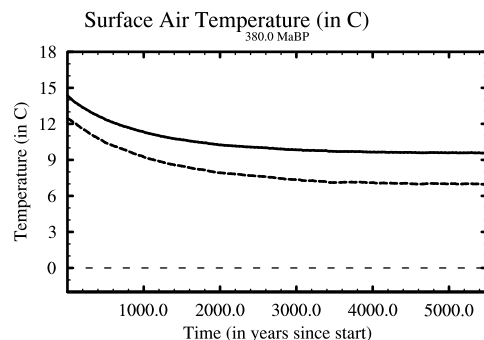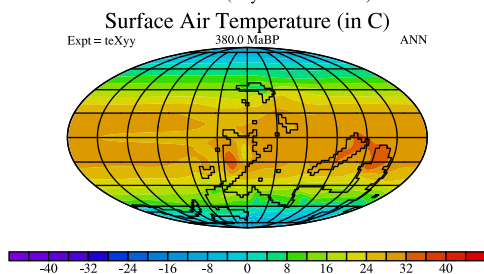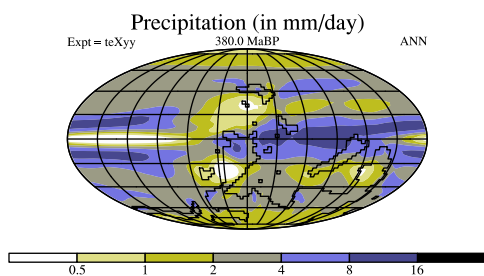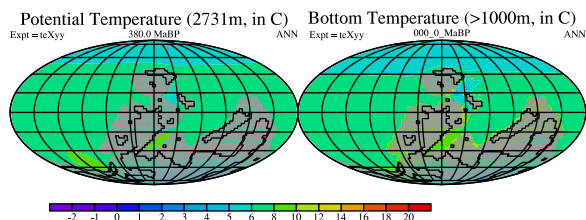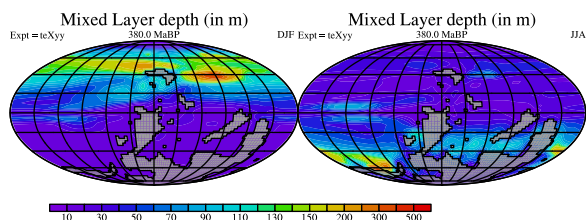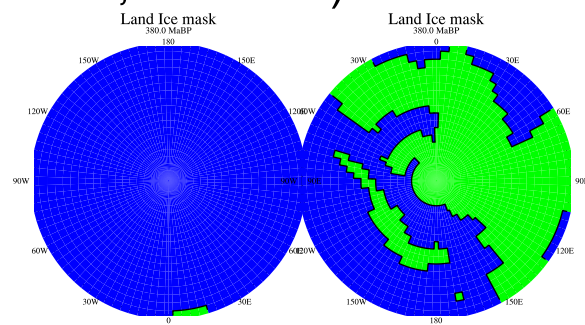

CO<sub>2</sub> = 1269 ppmv

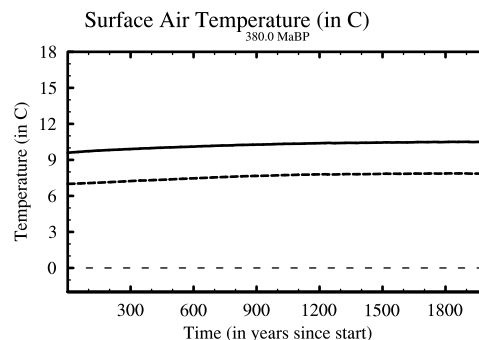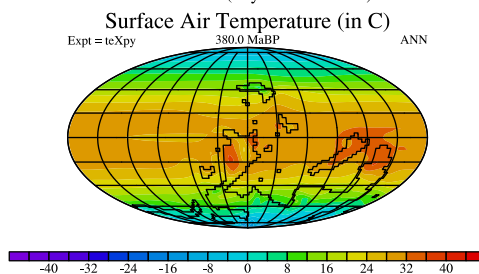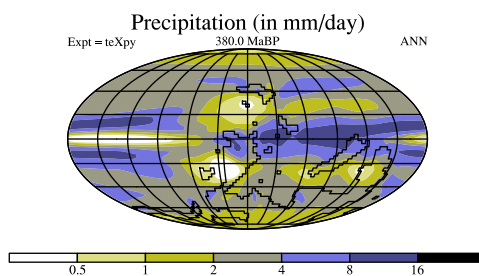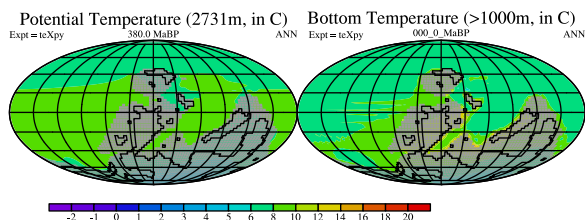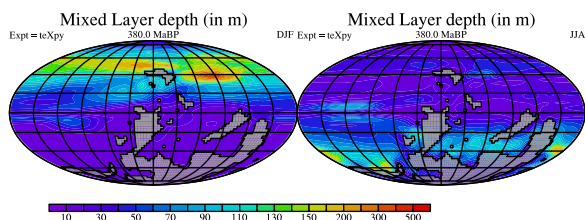

# Middle Devonian (Givetian, 385.2 Ma)

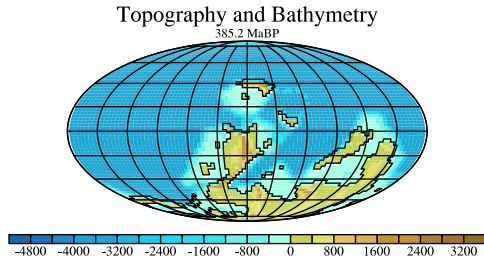

$\text{CO}_2 = 1079 \text{ ppmv}$

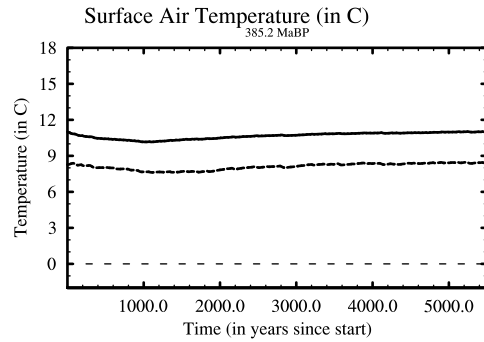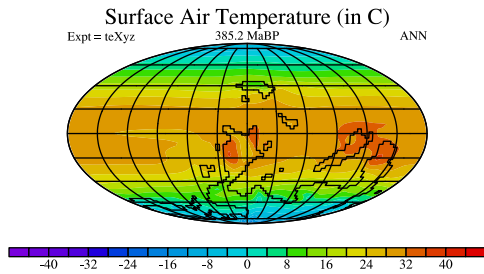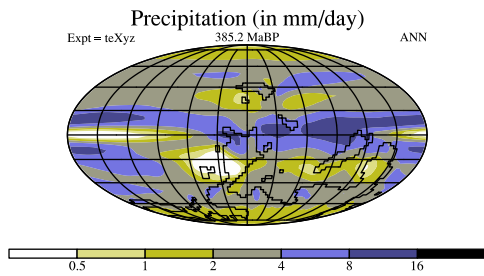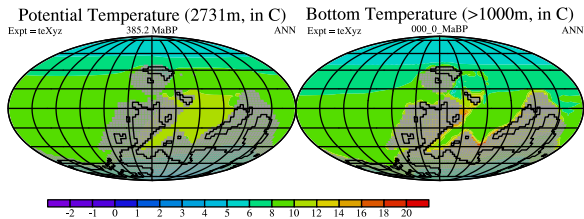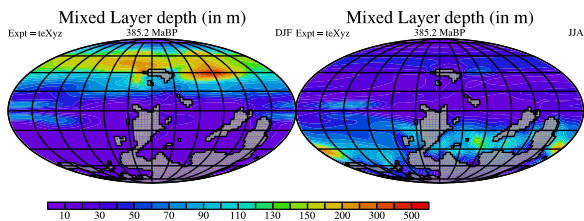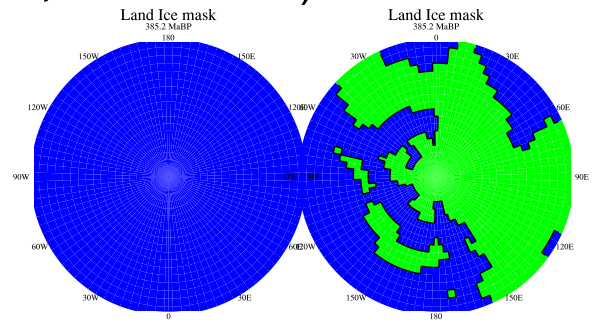

$\text{CO}_2 = 1377 \text{ ppmv}$

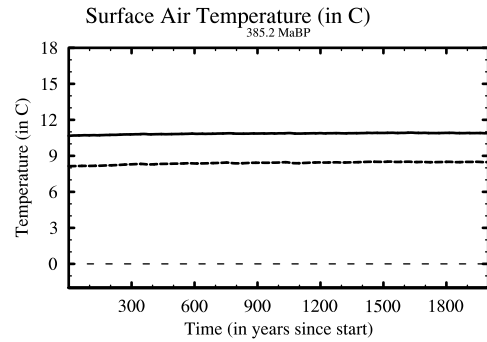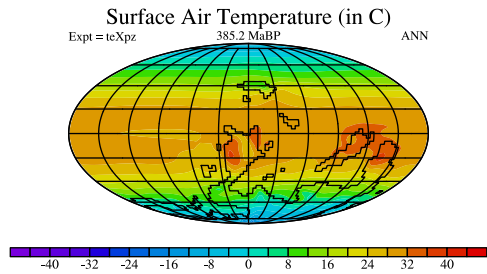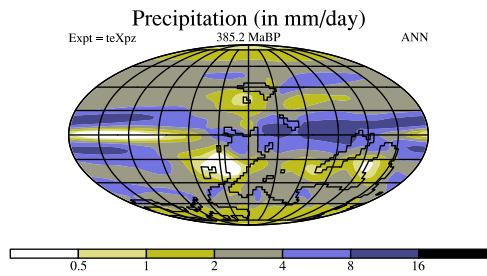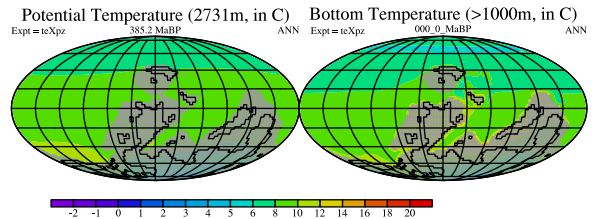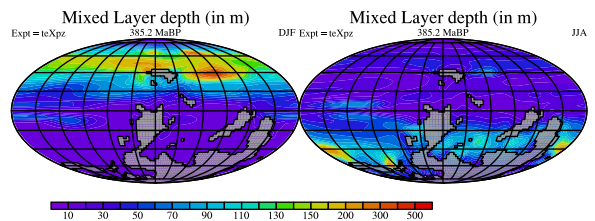

# Middle Devonian (Eifelian, 390.5 Ma)

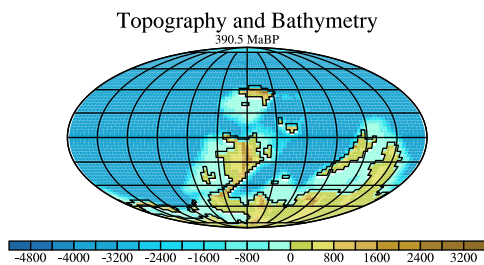

$\text{CO}_2 = 1131 \text{ ppmv}$

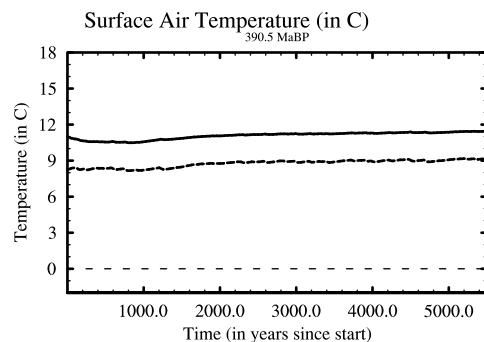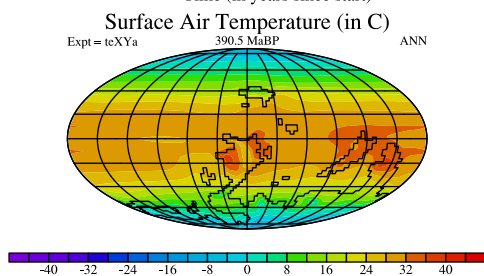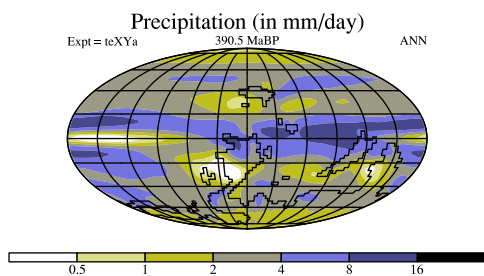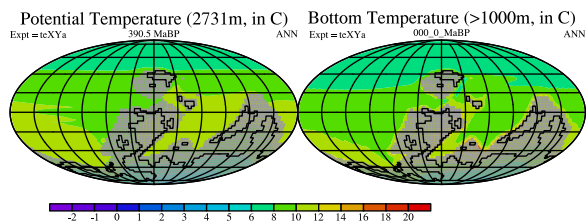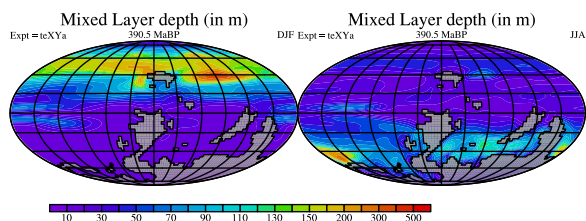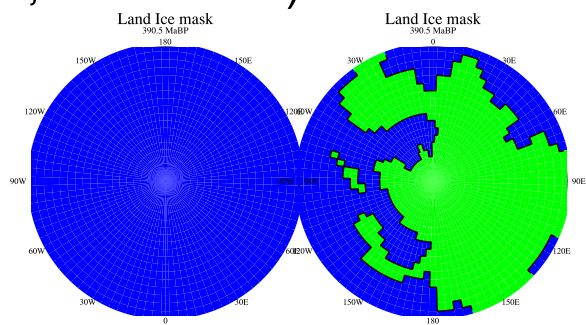

$\text{CO}_2 = 1093 \text{ ppmv}$

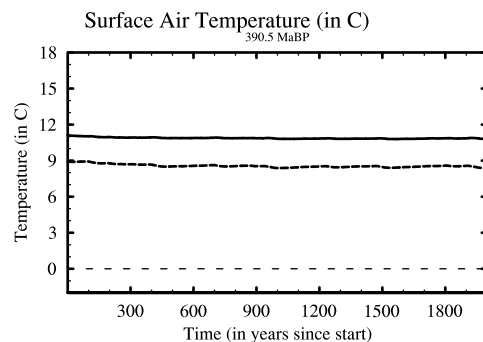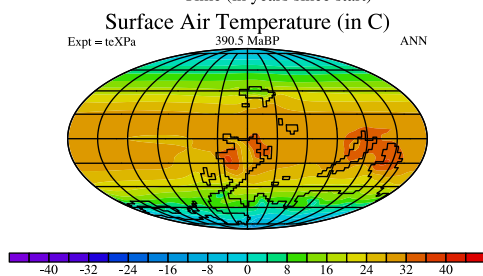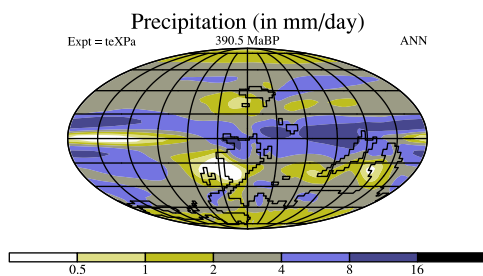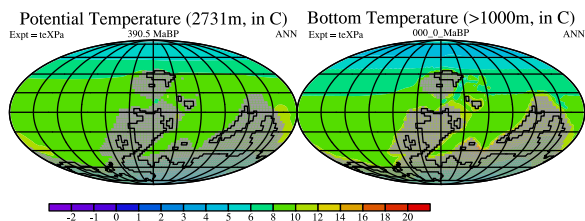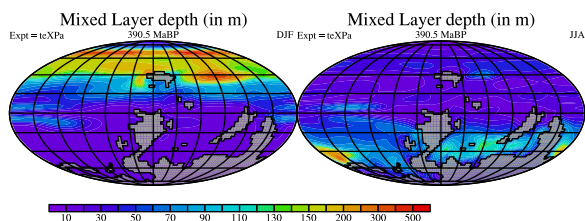



# Early Devonian (late Emsian, 395 Ma)

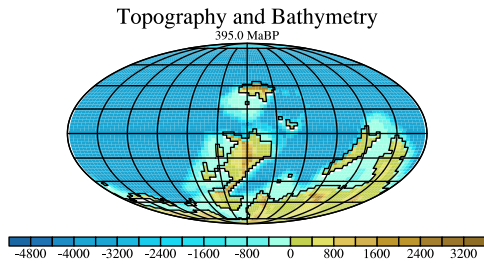

$\text{CO}_2 = 1174 \text{ ppmv}$

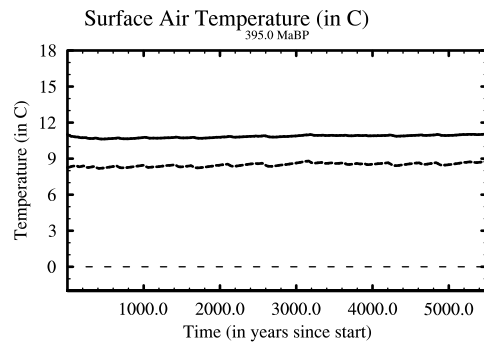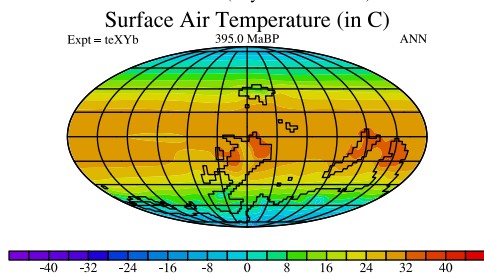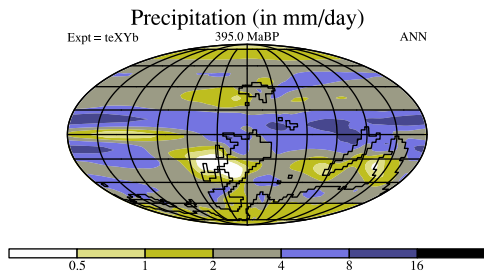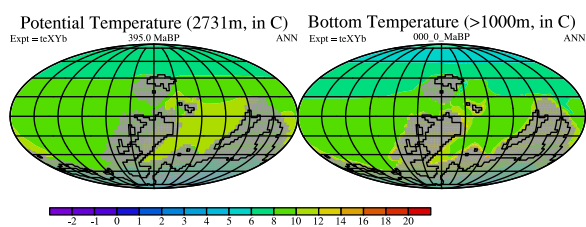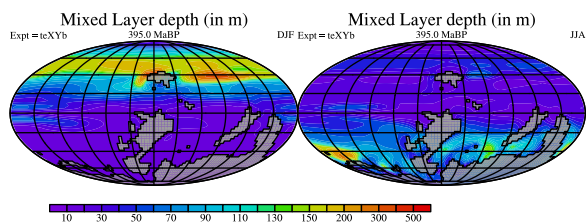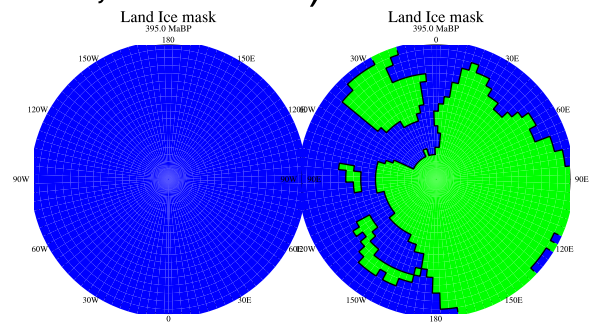

$\text{CO}_2 = 1297 \text{ ppmv}$

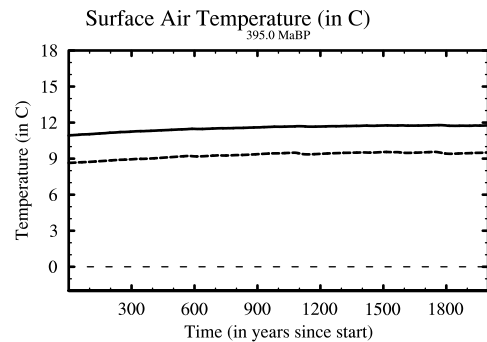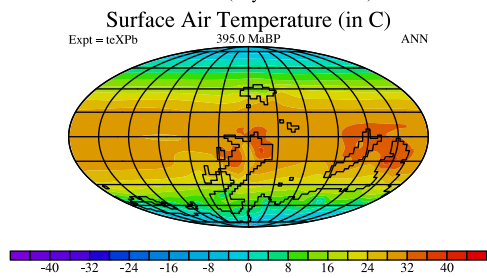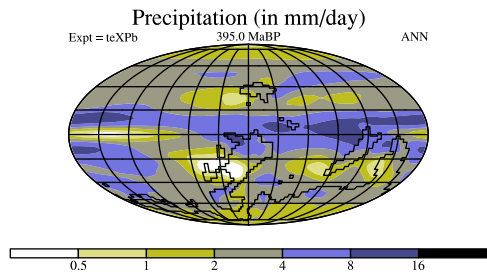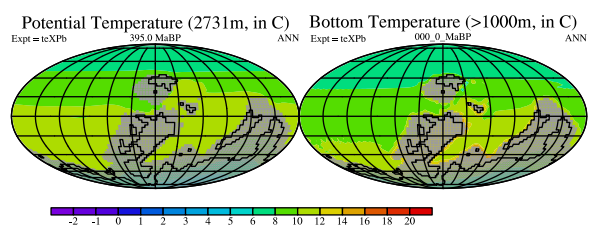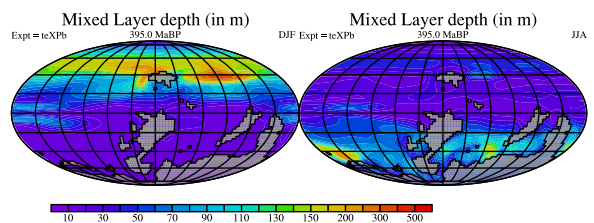

# Early Devonian (middle Emsian, 400 Ma)

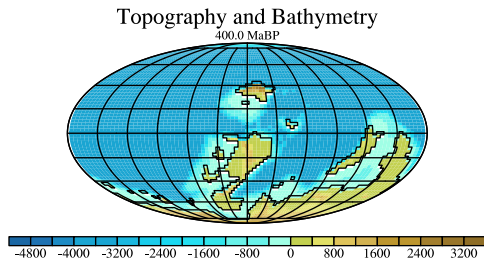

$\text{CO}_2 = 1223 \text{ ppmv}$

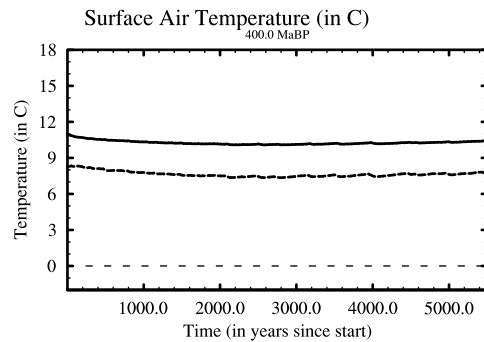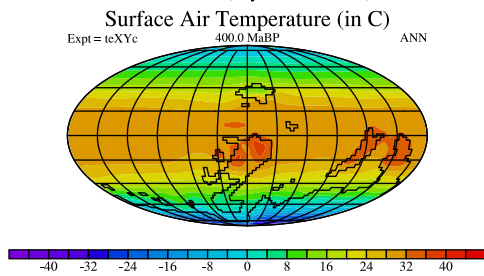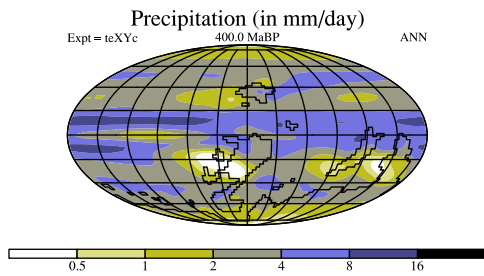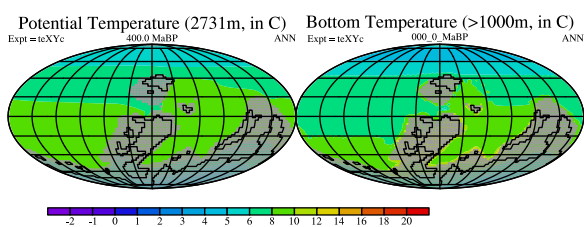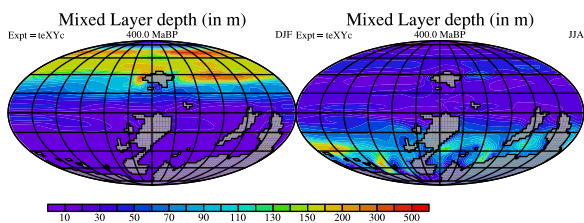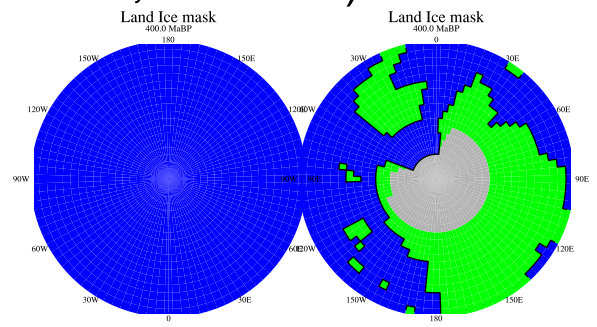

$\text{CO}_2 = 1731 \text{ ppmv}$

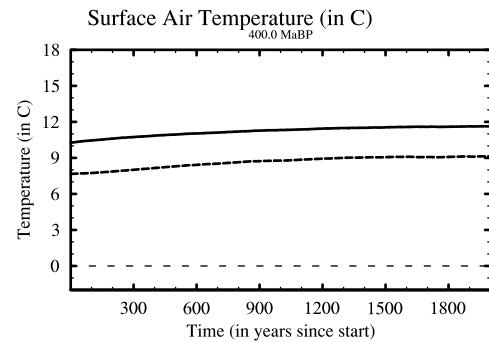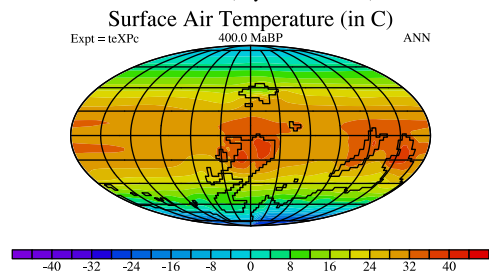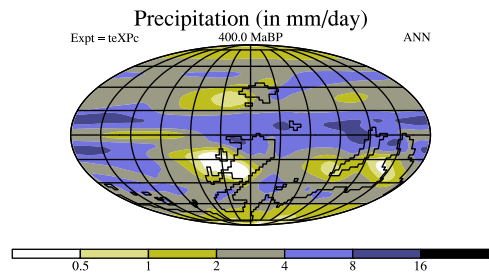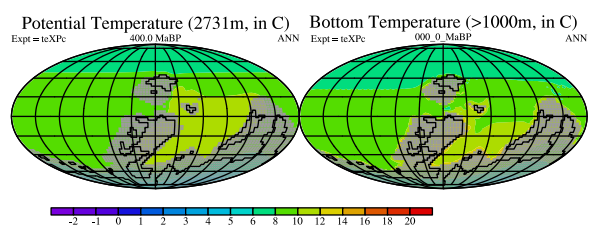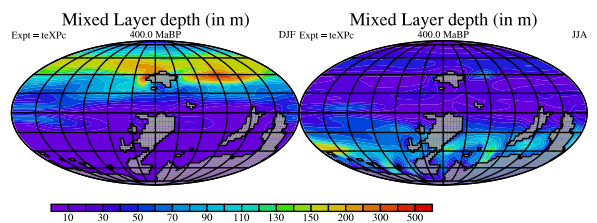

# Early Devonian (early Emsian, 405 Ma)

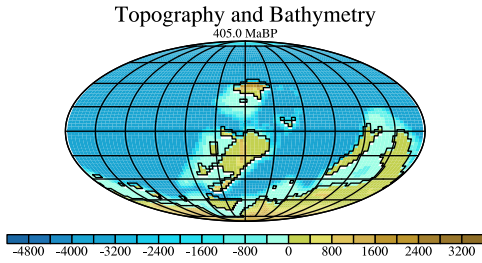

$\text{CO}_2 = 1271 \text{ ppmv}$

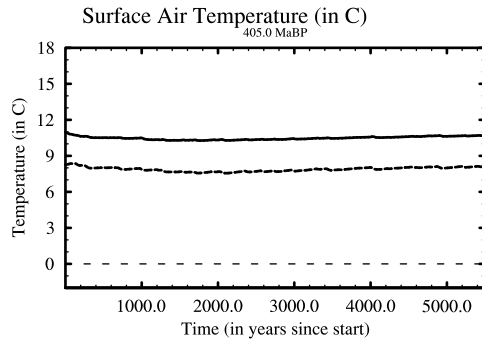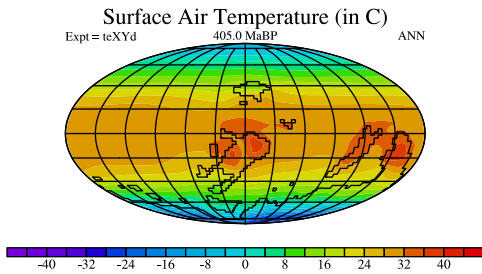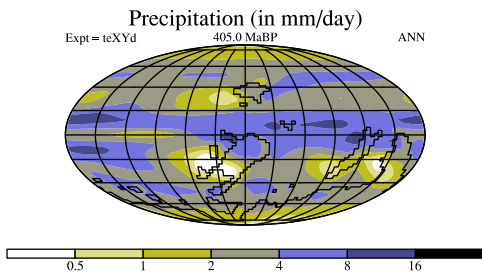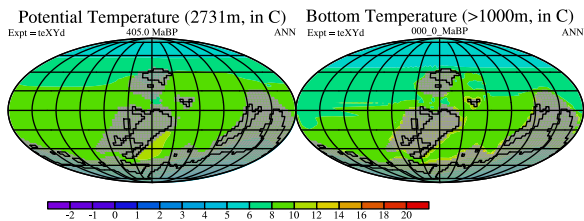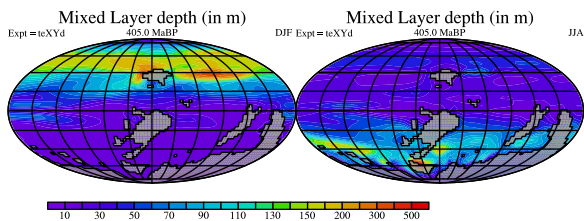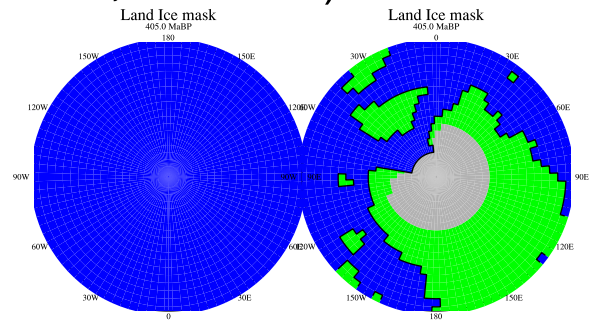

$\text{CO}_2 = 1689 \text{ ppmv}$

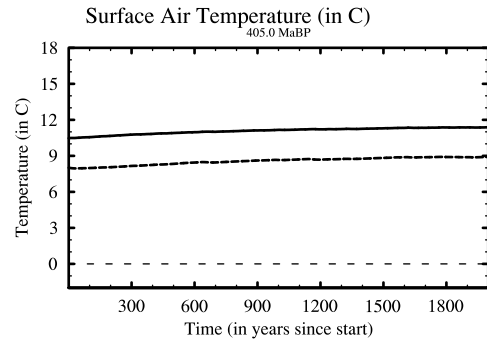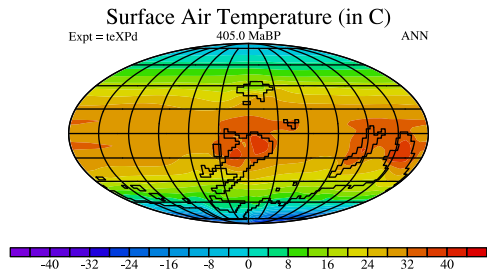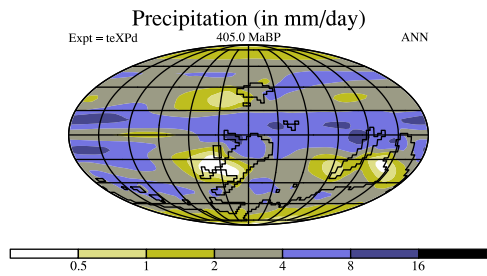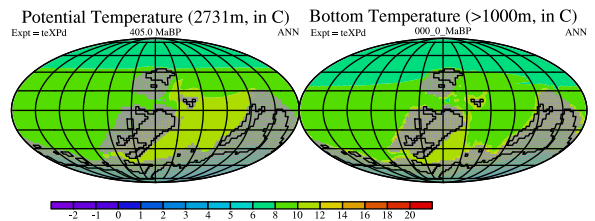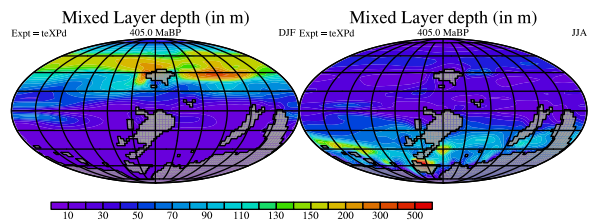



# Early Devonian (Pragian, 409.2 Ma)

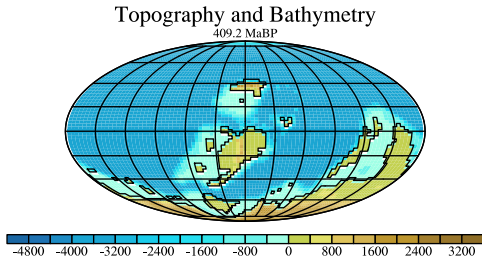

$\text{CO}_2 = 1319 \text{ ppmv}$

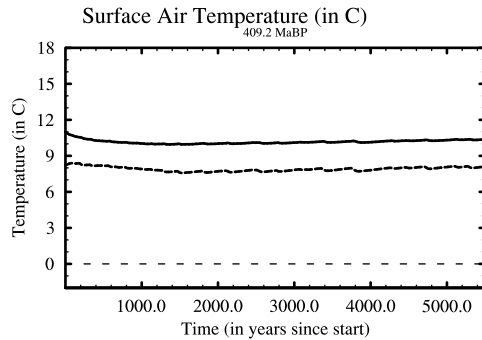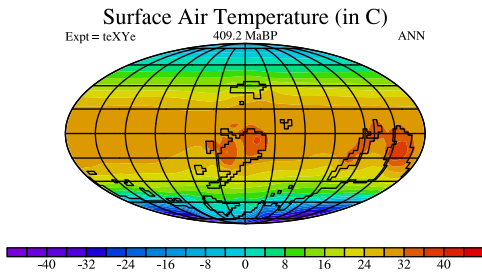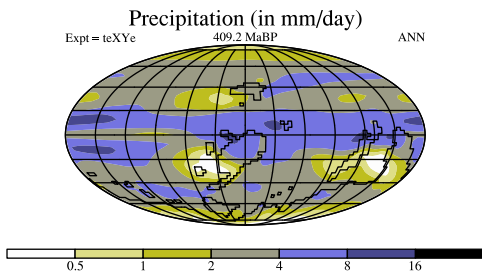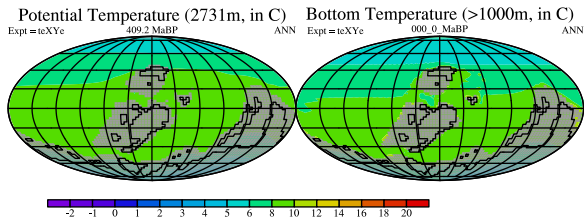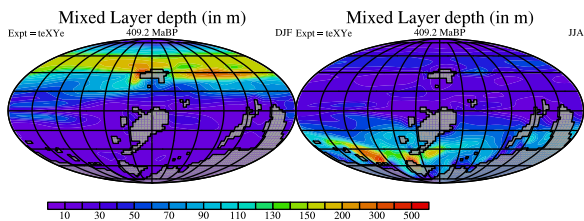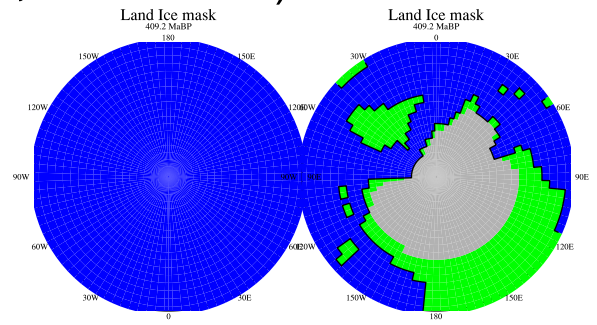

$\text{CO}_2 = 2102 \text{ ppmv}$

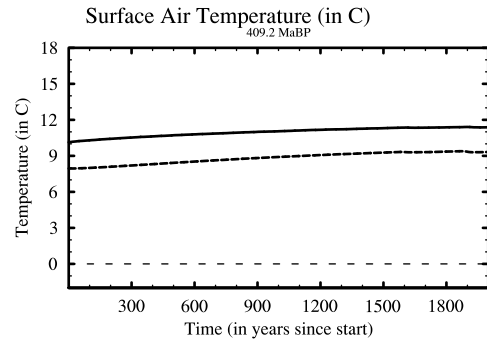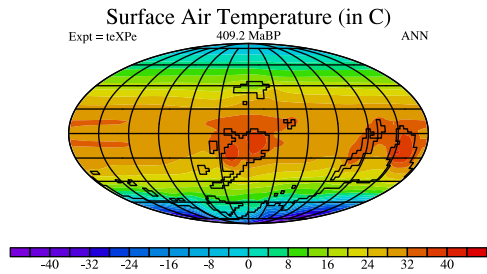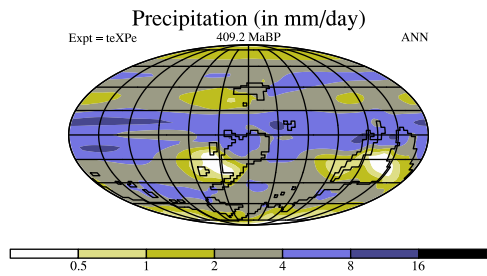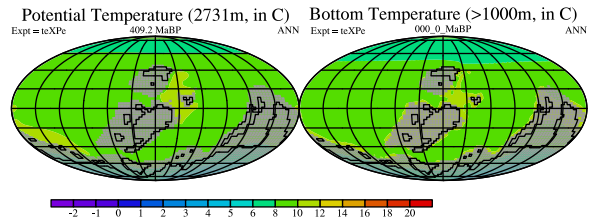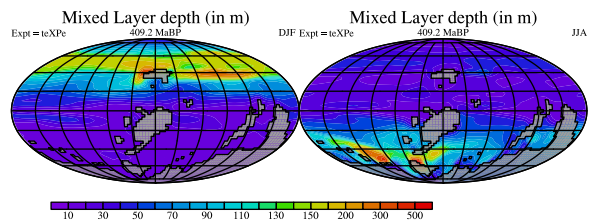

# Early Devonian (Lochkovian, 415 Ma)

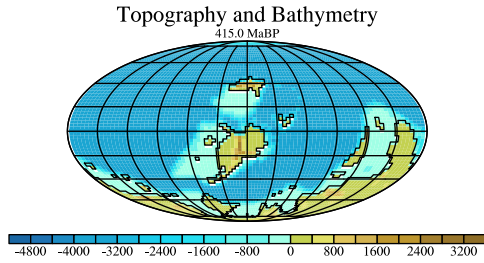

CO<sub>2</sub> = 1368 ppmv

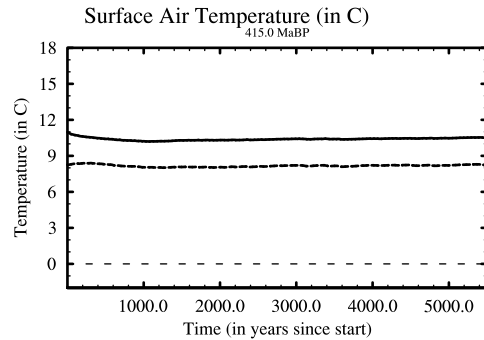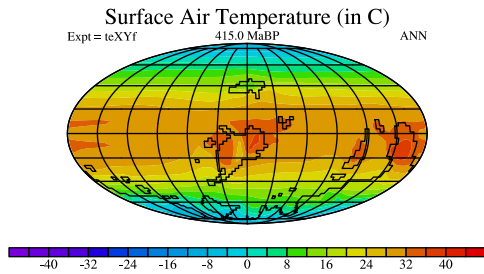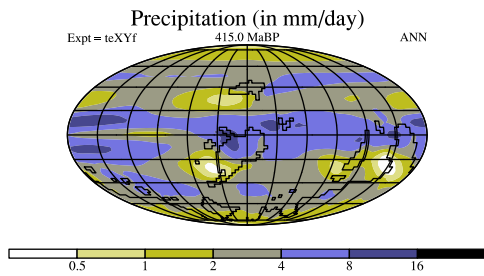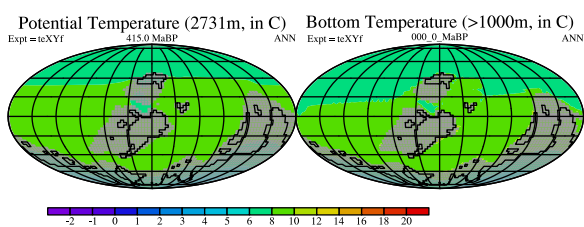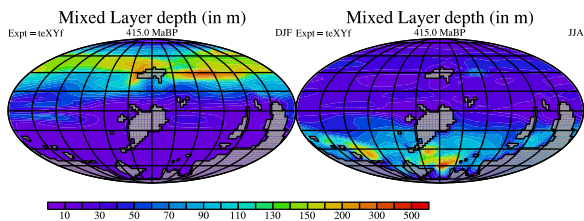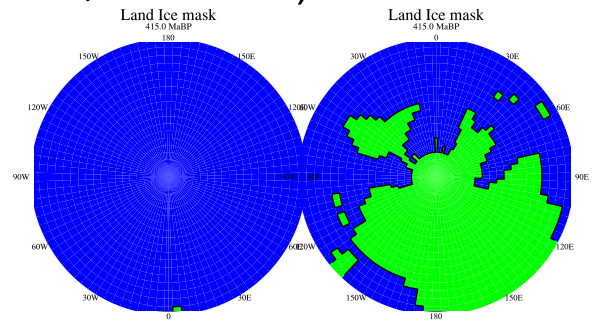

CO<sub>2</sub> = 1579 ppmv

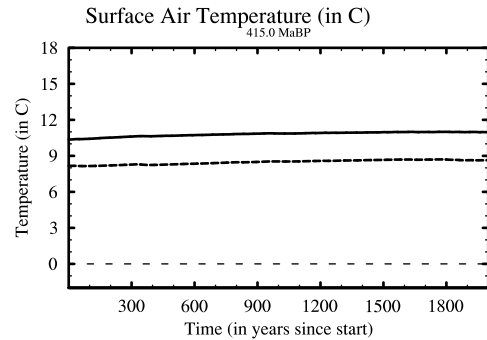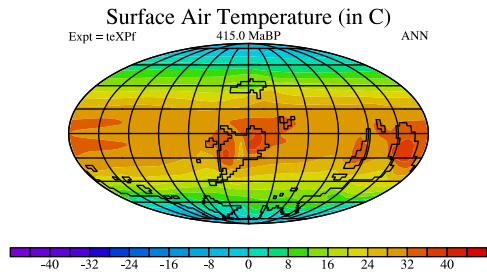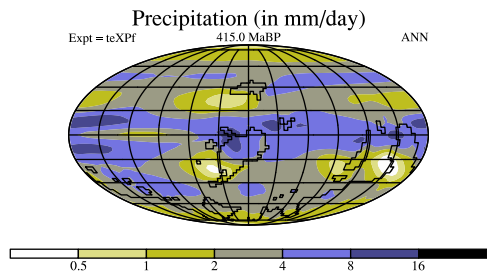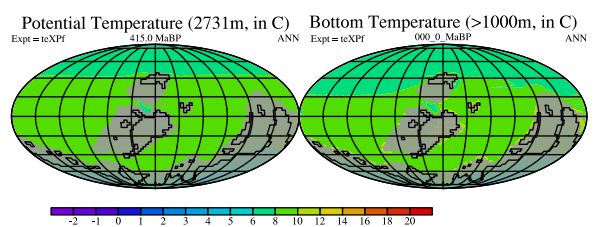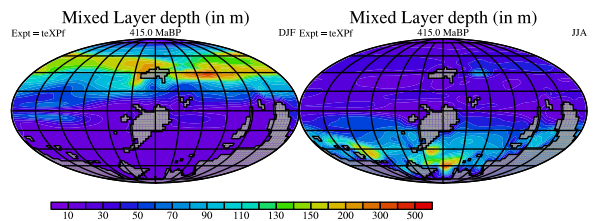

# Late Silurian (Pridoli, 421.1 Ma)

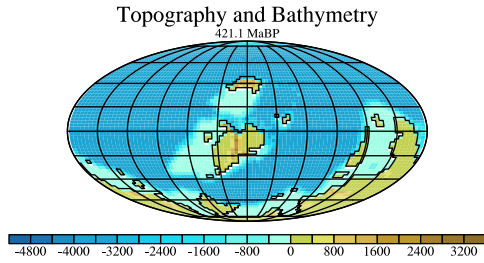

CO<sub>2</sub> = 1427 ppmv

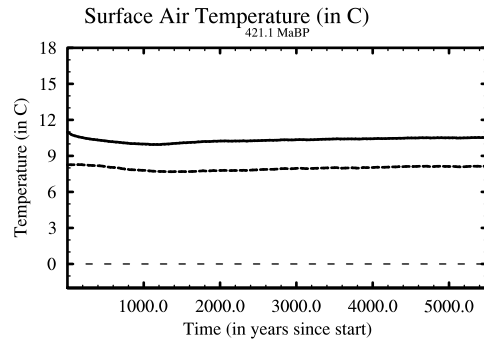

Surface Air Temperature (in C)  
Expt = teXYg 421.1 MaBP ANN

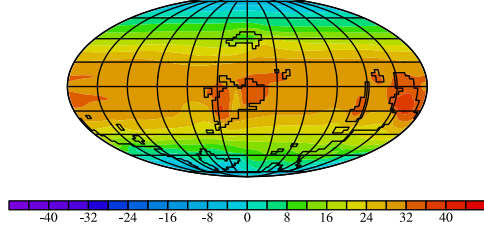

Precipitation (in mm/day)  
Expt = teXYg 421.1 MaBP ANN

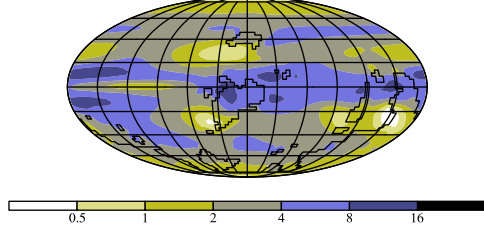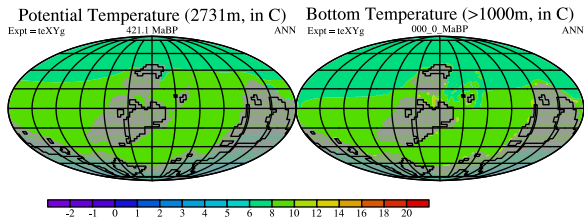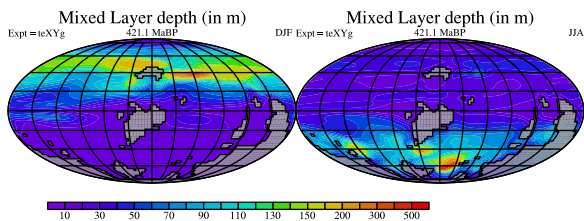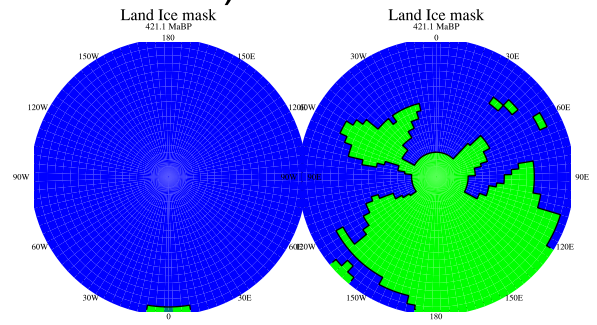

CO<sub>2</sub> = 1457 ppmv

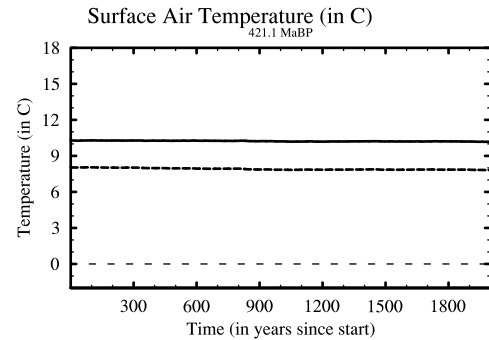

Surface Air Temperature (in C)  
Expt = teXPg 421.1 MaBP ANN

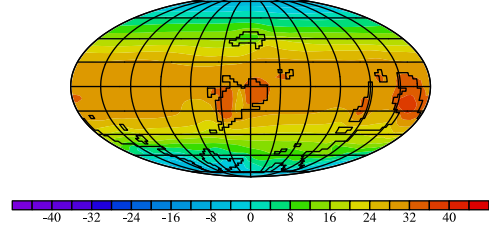

Precipitation (in mm/day)  
Expt = teXPg 421.1 MaBP ANN

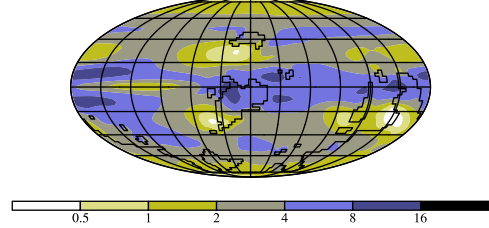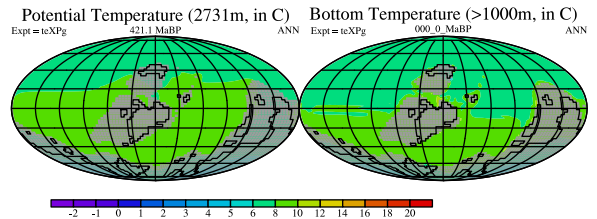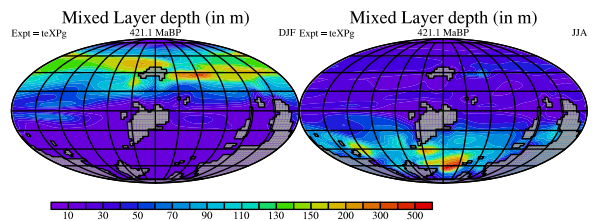



# Late Silurian (Ludlow, 425.2 Ma)

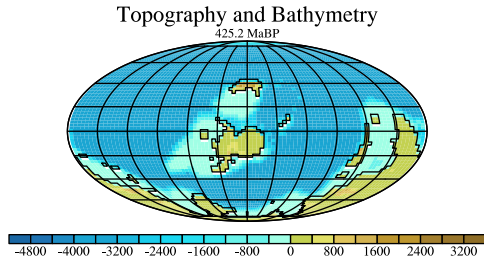

CO<sub>2</sub> = 1466 ppmv

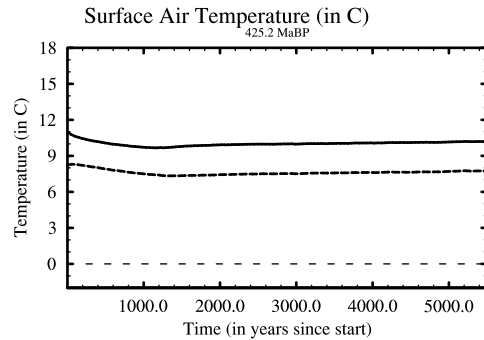

Surface Air Temperature (in C)  
Expt = teXYh 425.2 MaBP ANN

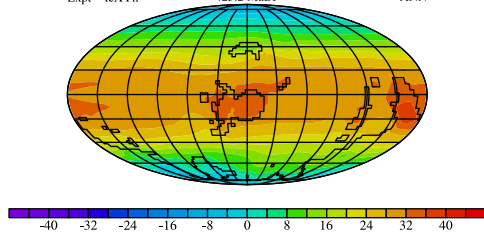

Precipitation (in mm/day)  
Expt = teXYh 425.2 MaBP ANN

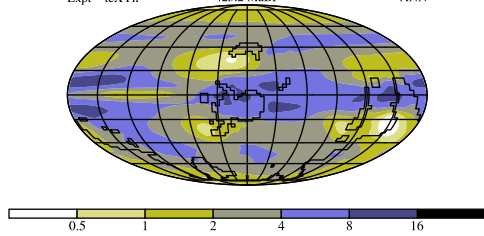

Potential Temperature (2731m, in C) Bottom Temperature (>1000m, in C)  
Expt = teXYh 425.2 MaBP ANN Expt = teXYh 000.0 MaBP ANN

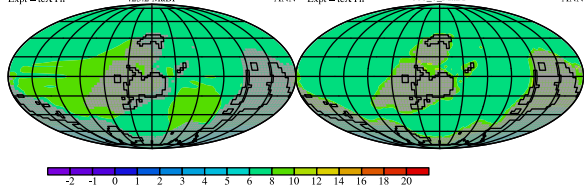

Mixed Layer depth (in m) Mixed Layer depth (in m)  
Expt = teXYh 425.2 MaBP DJF Expt = teXYh 425.2 MaBP JJA

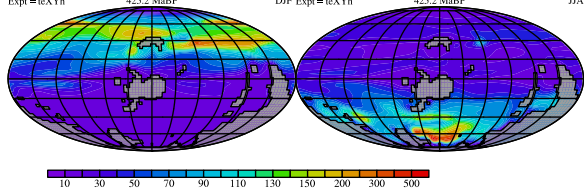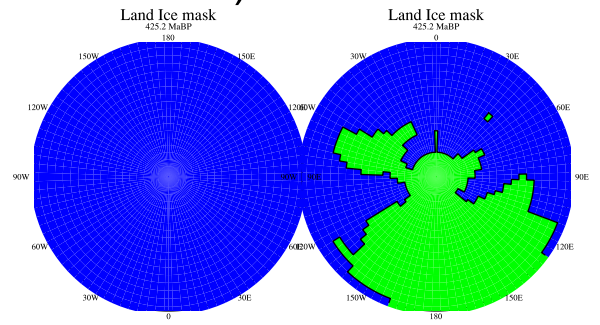

CO<sub>2</sub> = 1490 ppmv

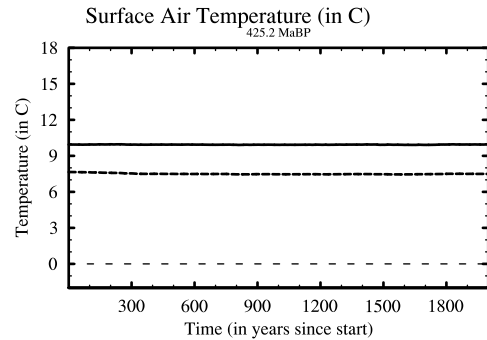

Surface Air Temperature (in C)  
Expt = teXPh 425.2 MaBP ANN

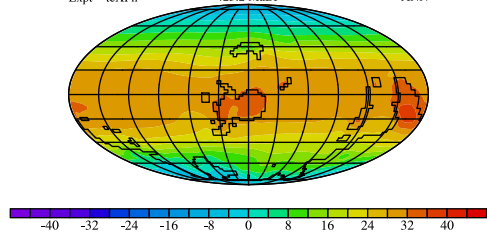

Precipitation (in mm/day)  
Expt = teXPh 425.2 MaBP ANN

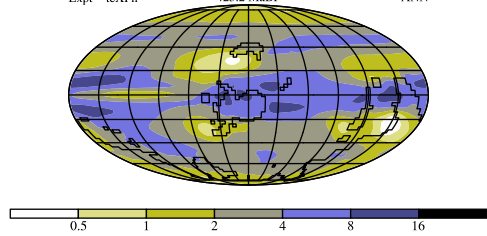

Potential Temperature (2731m, in C) Bottom Temperature (>1000m, in C)  
Expt = teXPh 425.2 MaBP ANN Expt = teXPh 000.0 MaBP ANN

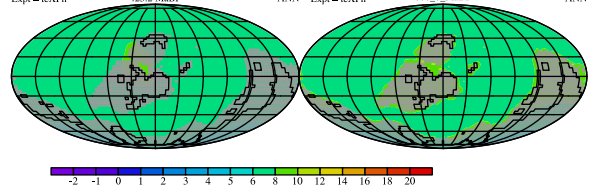

Mixed Layer depth (in m) Mixed Layer depth (in m)  
Expt = teXPh 425.2 MaBP DJF Expt = teXPh 425.2 MaBP JJA

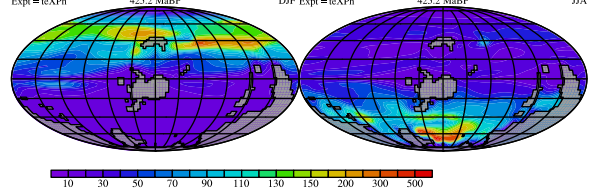

# Middle Silurian (Wenlock, 430.4 Ma)

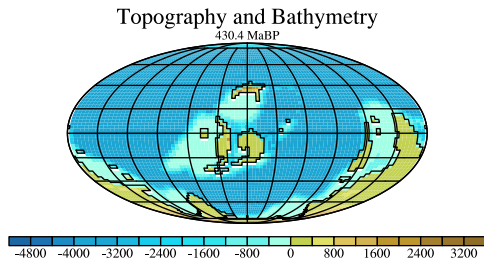

CO<sub>2</sub> = 1517 ppmv

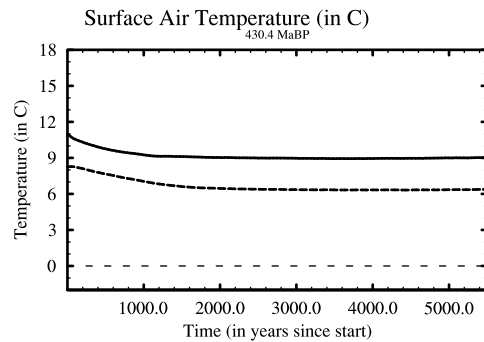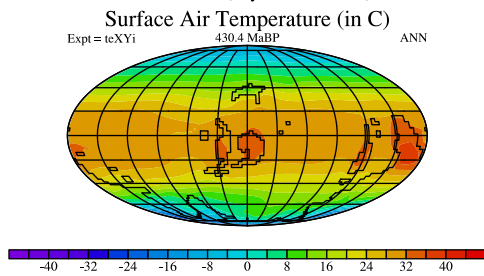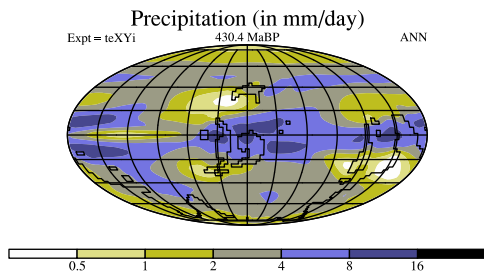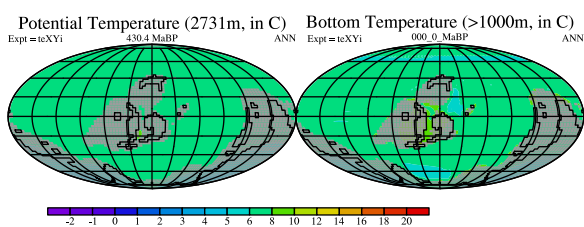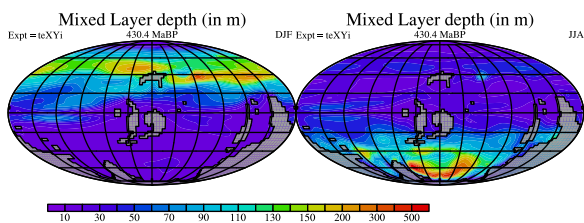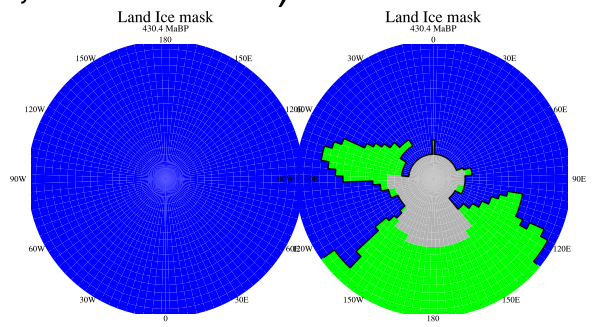

CO<sub>2</sub> = 1531 ppmv

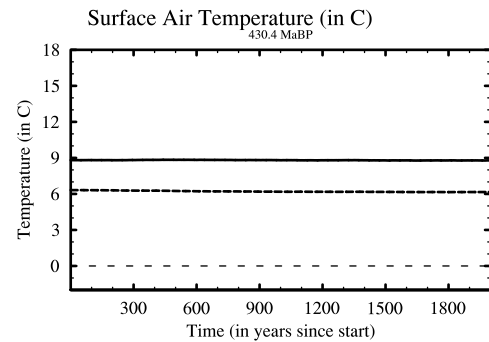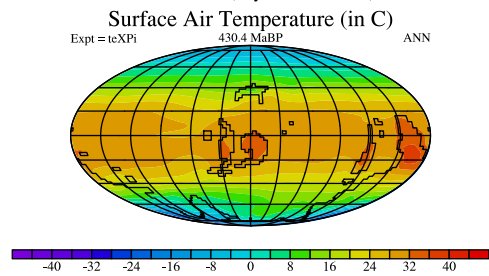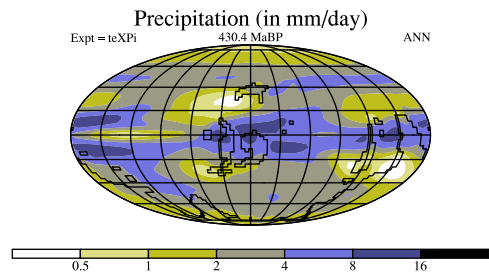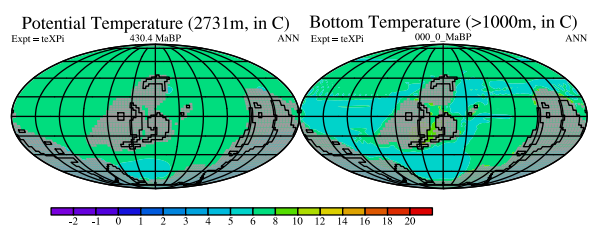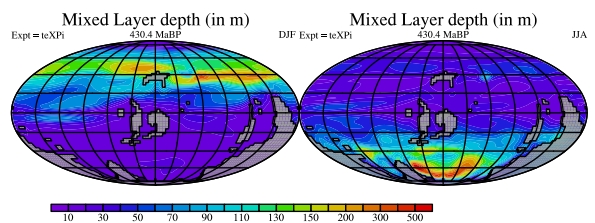

# Early Silurian (late Llandovery, 436 Ma)

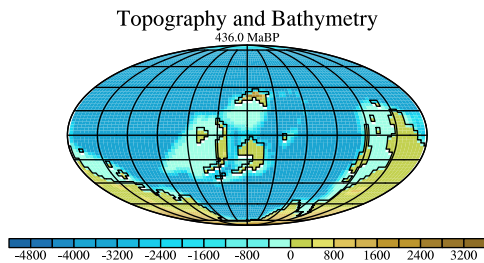

$\text{CO}_2 = 1571 \text{ ppmv}$

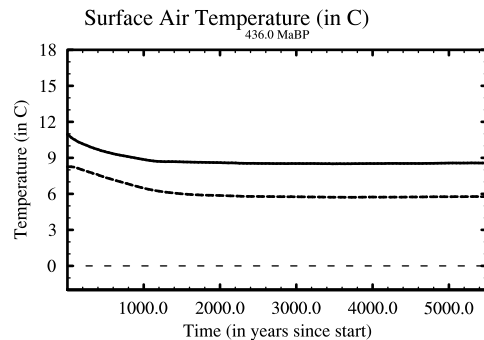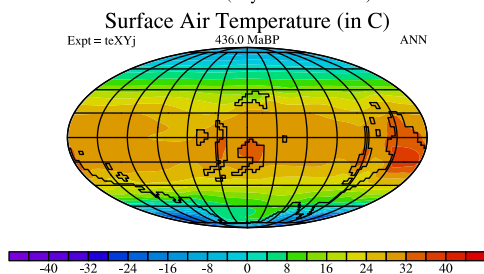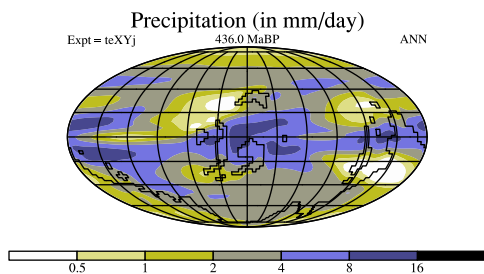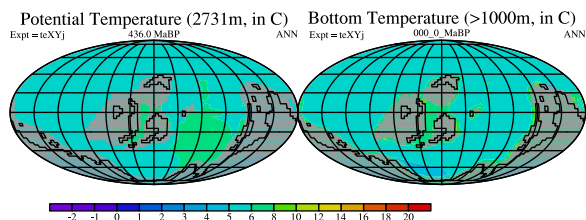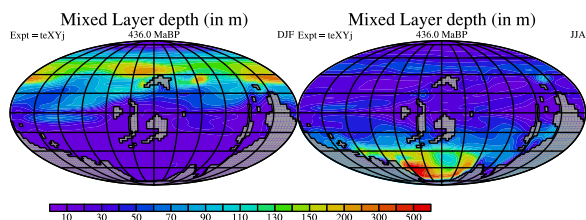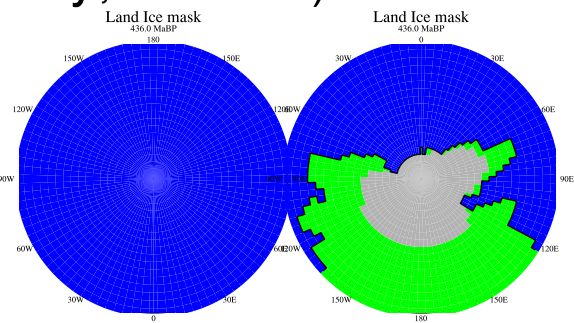

$\text{CO}_2 = 1576 \text{ ppmv}$

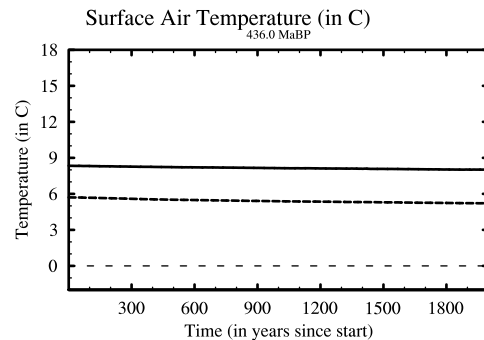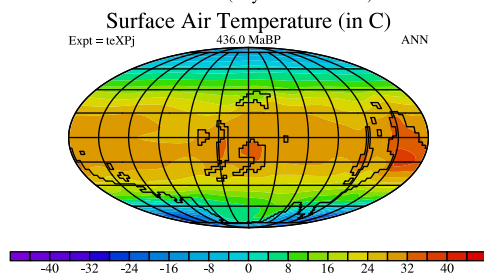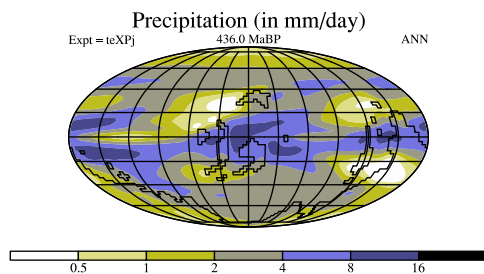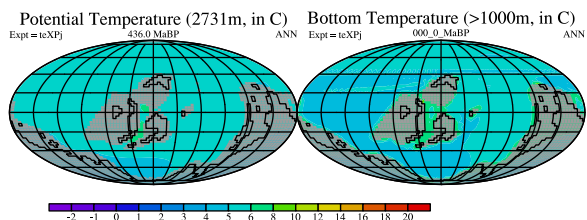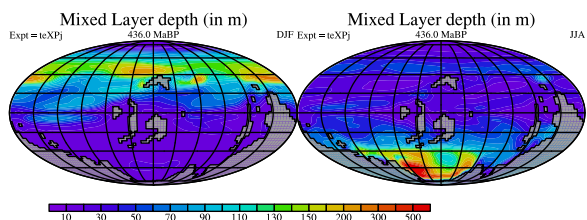



# Early Silurian (early Llandovery, 441.2 Ma)

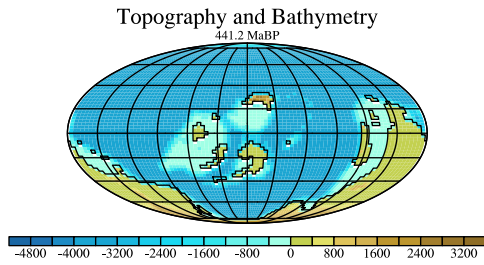

$\text{CO}_2 = 1614 \text{ ppmv}$

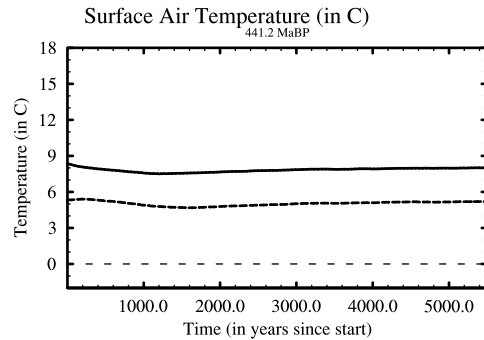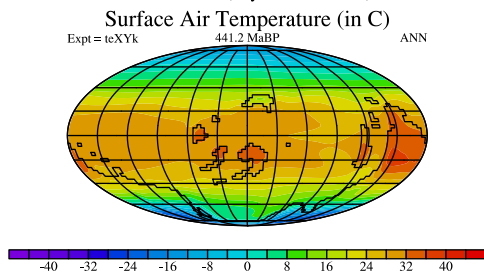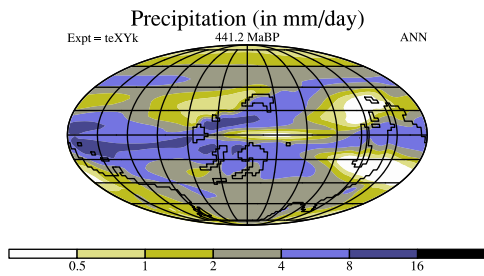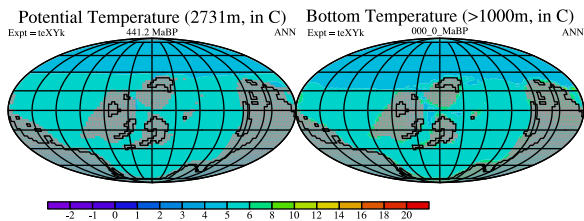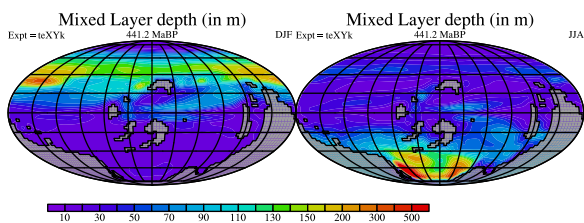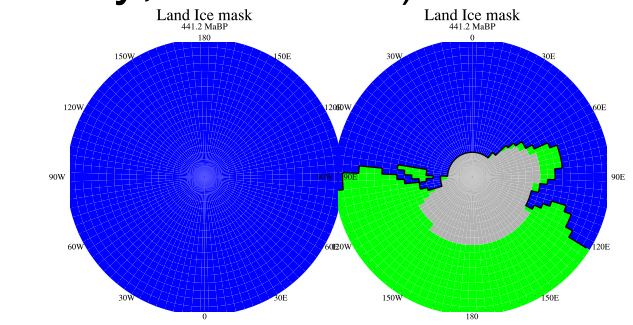

$\text{CO}_2 = 1643 \text{ ppmv}$

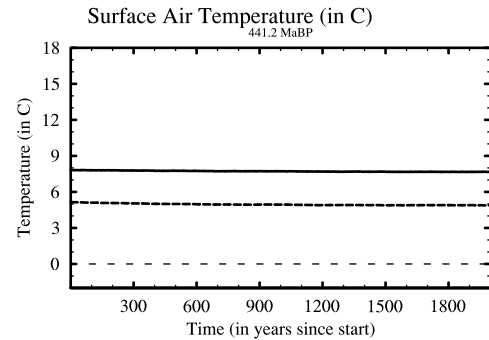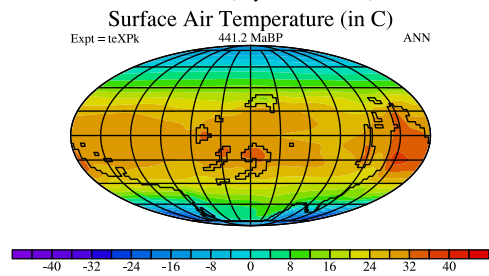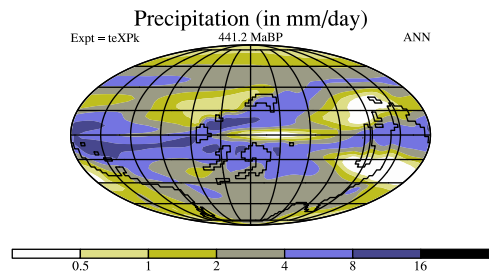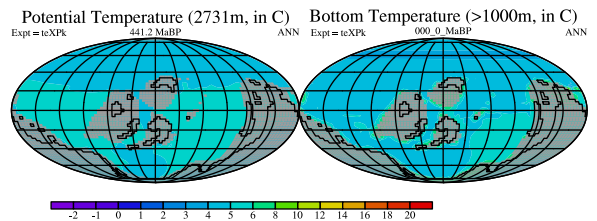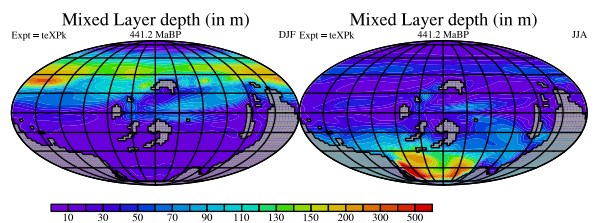

# Late Ordovician (Hirnantian, 444.5 Ma)

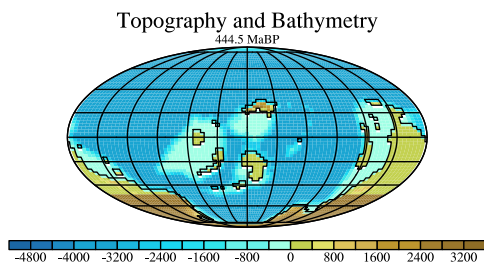

$\text{CO}_2 = 1636 \text{ ppmv}$

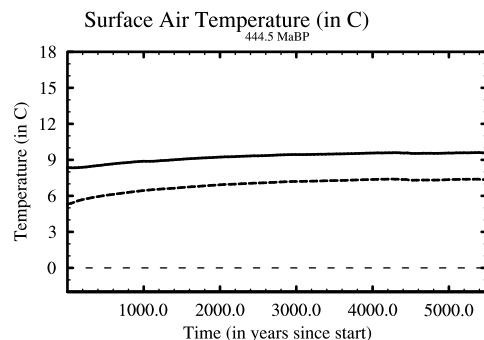

Surface Air Temperature (in C)  
Expt = teXYI 444.5 MaBP ANN

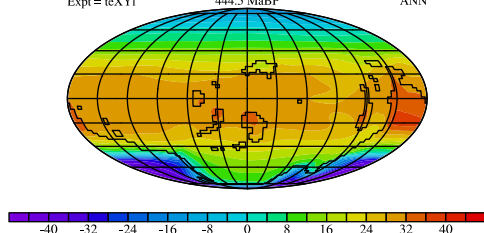

Precipitation (in mm/day)  
Expt = teXYI 444.5 MaBP ANN

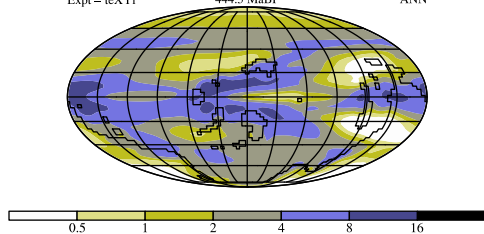

Potential Temperature (2731m, in C) Bottom Temperature (>1000m, in C)  
Expt = teXYI 444.5 MaBP ANN Expt = teXYI 000.0 MaBP ANN

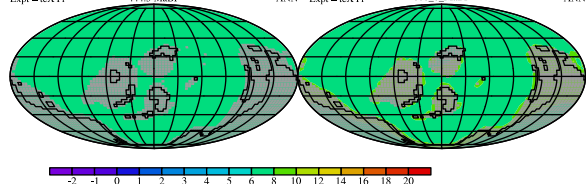

Mixed Layer depth (in m) Mixed Layer depth (in m)  
Expt = teXYI 444.5 MaBP DJF Expt = teXYI 444.5 MaBP JJA

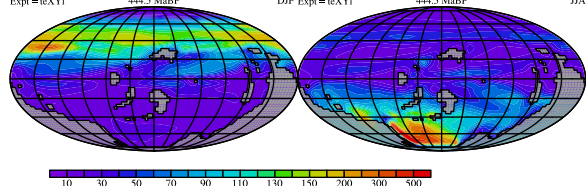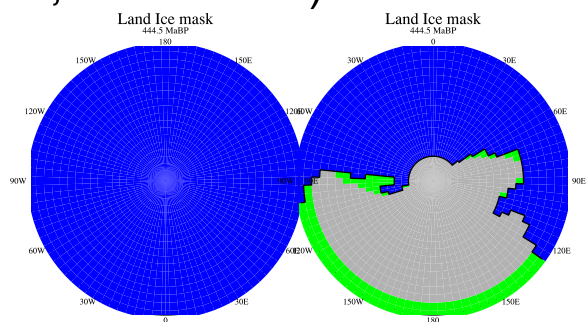

$\text{CO}_2 = 1708 \text{ ppmv}$

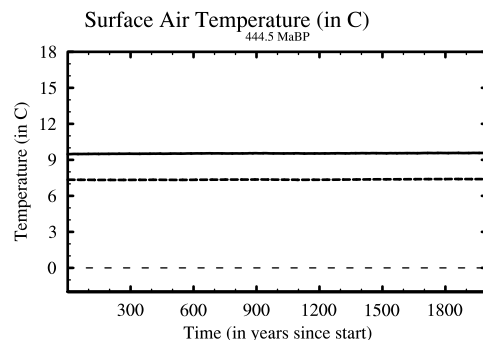

Surface Air Temperature (in C)  
Expt = teXPI 444.5 MaBP ANN

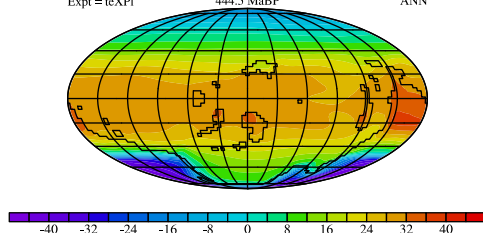

Precipitation (in mm/day)  
Expt = teXPI 444.5 MaBP ANN

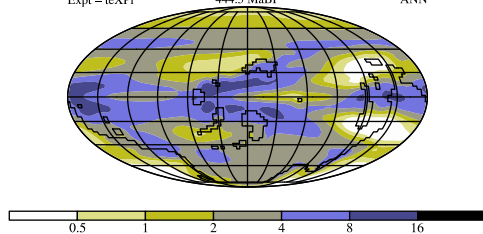

Potential Temperature (2731m, in C) Bottom Temperature (>1000m, in C)  
Expt = teXPI 444.5 MaBP ANN Expt = teXPI 000.0 MaBP ANN

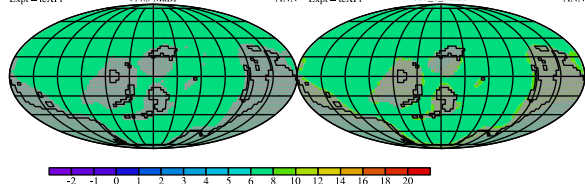

Mixed Layer depth (in m) Mixed Layer depth (in m)  
Expt = teXPI 444.5 MaBP DJF Expt = teXPI 444.5 MaBP JJA

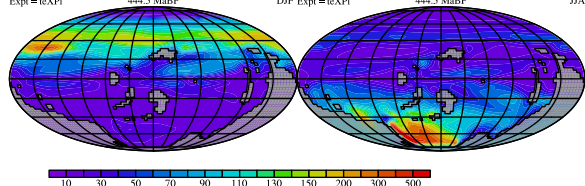

# Late Ordovician (Katian, 449.1 Ma)

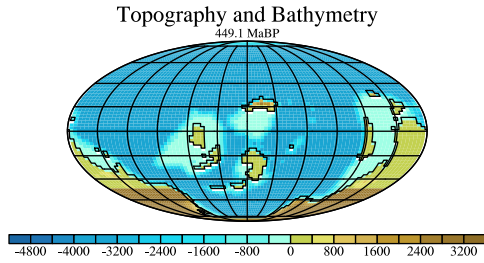

CO<sub>2</sub> = 1666 ppmv

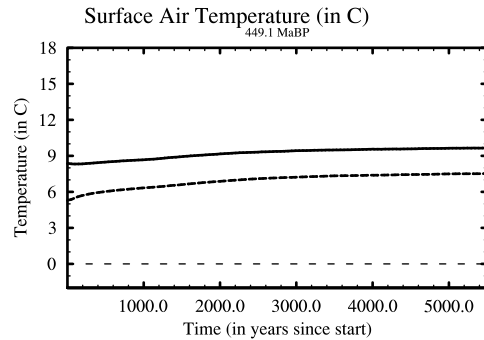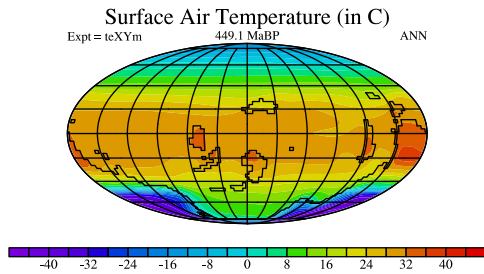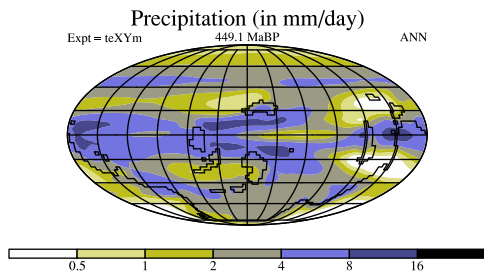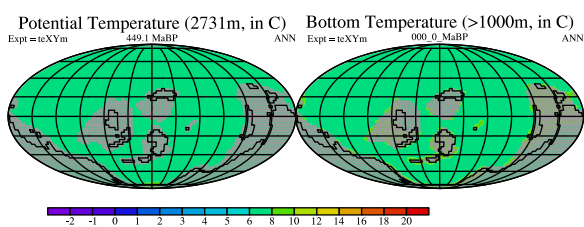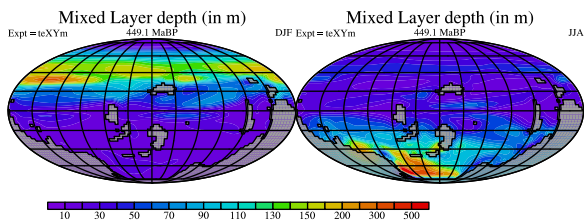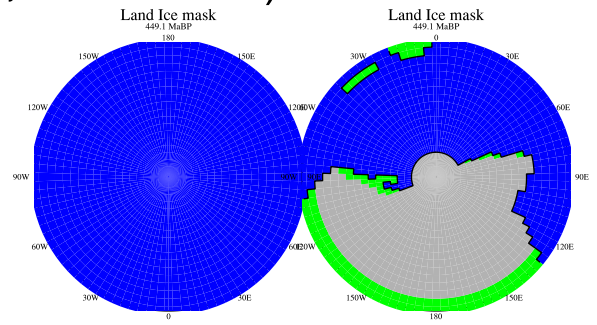

CO<sub>2</sub> = 1799 ppmv

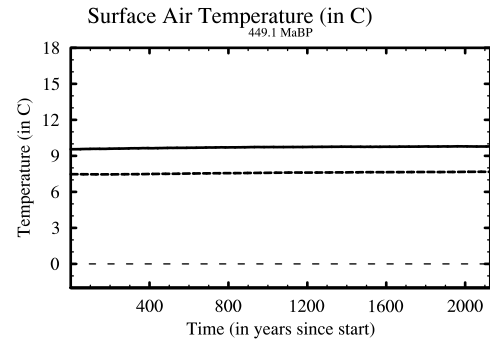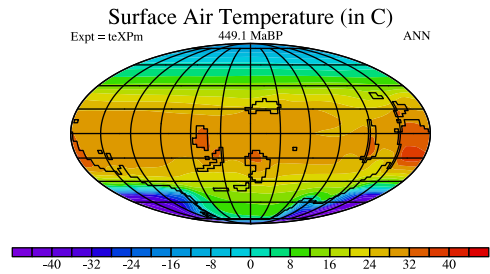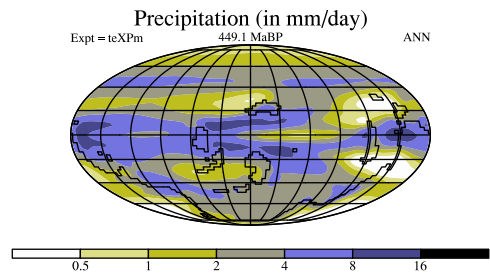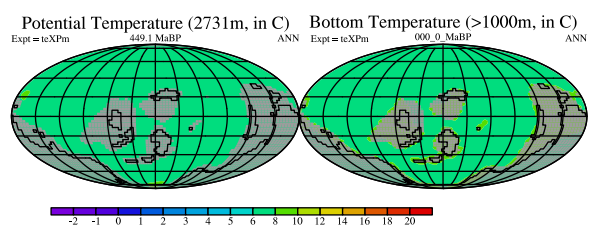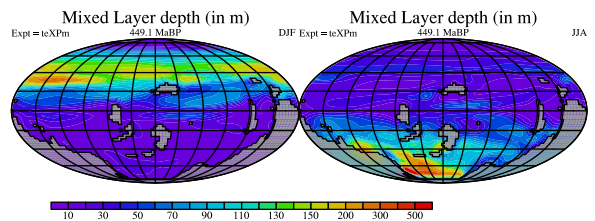



# Late Ordovician (Sandbian, 455.7 Ma)

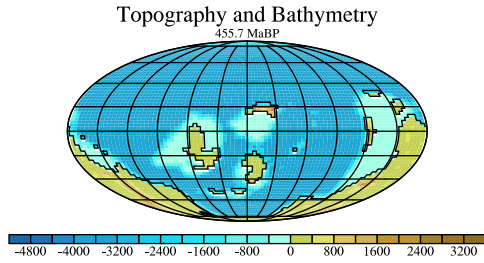

CO<sub>2</sub> = 1710 ppmv

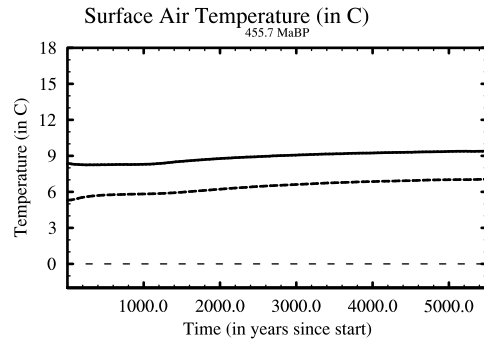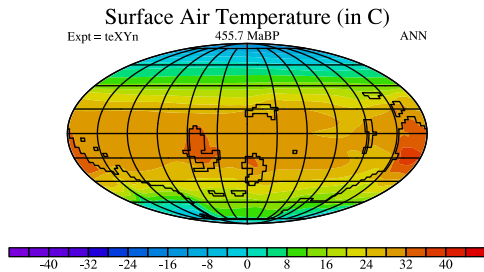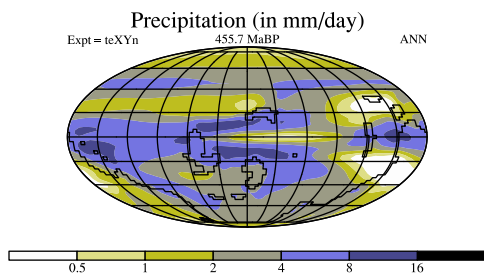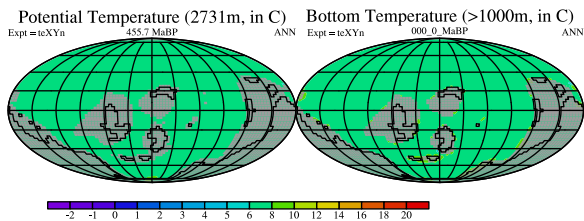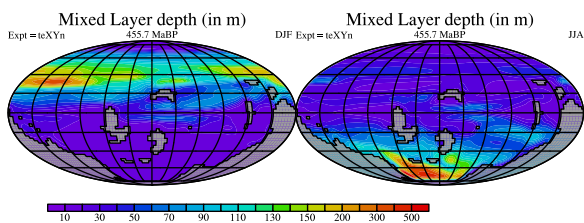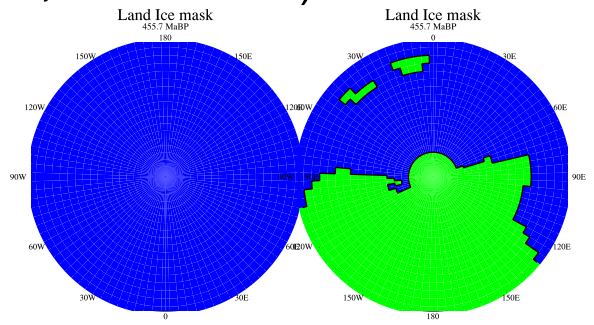

CO<sub>2</sub> = 1929 ppmv

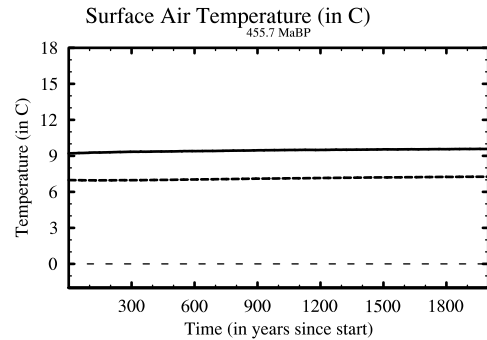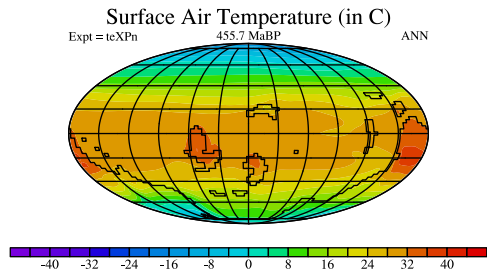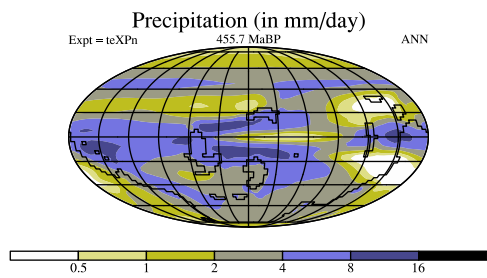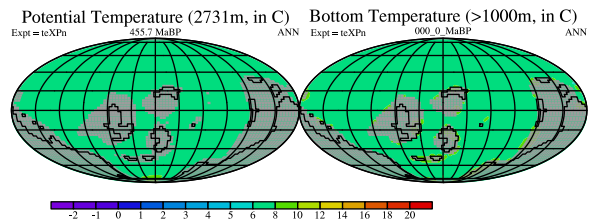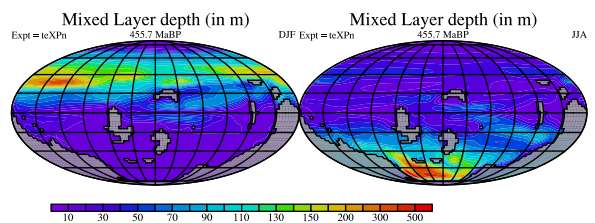

# Middle Ordovician (late Darwillian, 460 Ma)

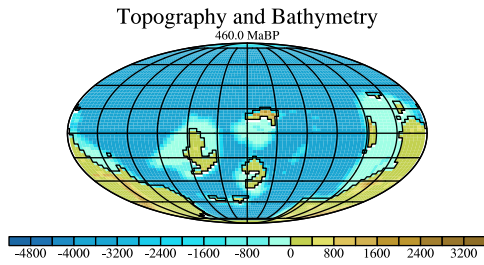

$\text{CO}_2 = 1738 \text{ ppmv}$

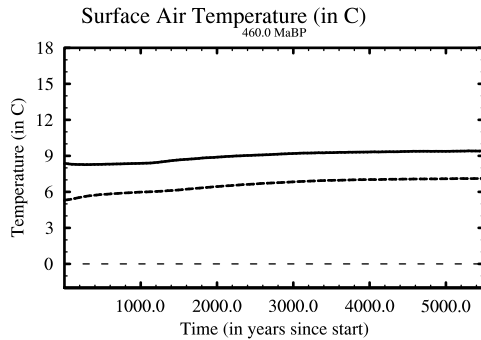

Surface Air Temperature (in C)  
Expt = teXYo 460.0 MaBP ANN

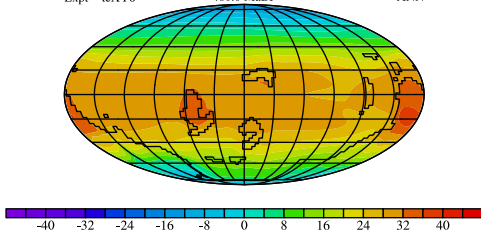

Precipitation (in mm/day)  
Expt = teXYo 460.0 MaBP ANN

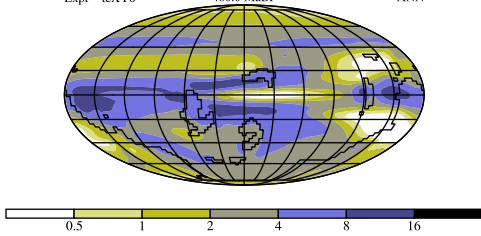

Potential Temperature (2731m, in C) Bottom Temperature (>1000m, in C)  
Expt = teXYo 460.0 MaBP ANN Expt = teXYo 000.0 MaBP ANN

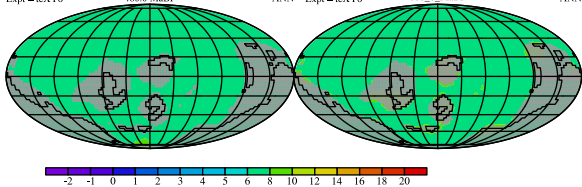

Mixed Layer depth (in m) Mixed Layer depth (in m)  
Expt = teXYo 460.0 MaBP DJF Expt = teXYo 460.0 MaBP JJA

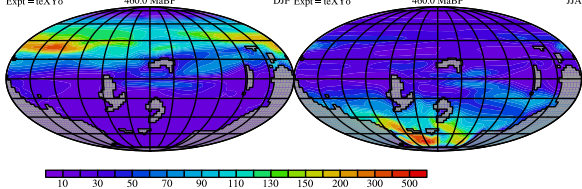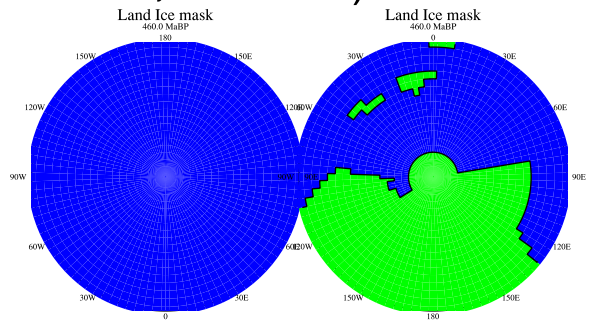

$\text{CO}_2 = 2013 \text{ ppmv}$

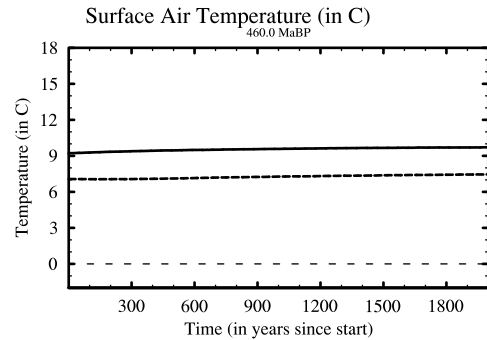

Surface Air Temperature (in C)  
Expt = teXPo 460.0 MaBP ANN

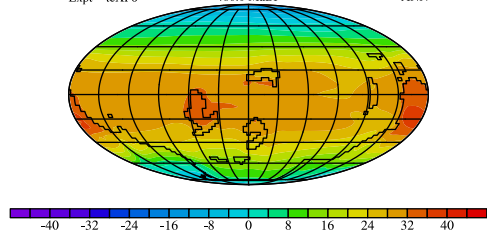

Precipitation (in mm/day)  
Expt = teXPo 460.0 MaBP ANN

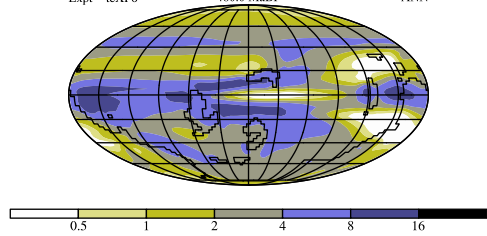

Potential Temperature (2731m, in C) Bottom Temperature (>1000m, in C)  
Expt = teXPo 460.0 MaBP ANN Expt = teXPo 000.0 MaBP ANN

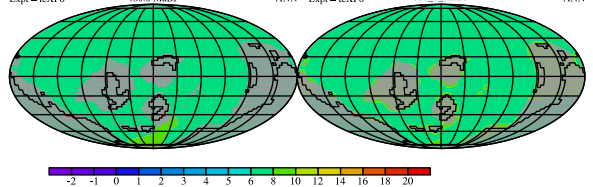

Mixed Layer depth (in m) Mixed Layer depth (in m)  
Expt = teXPo 460.0 MaBP DJF Expt = teXPo 460.0 MaBP JJA

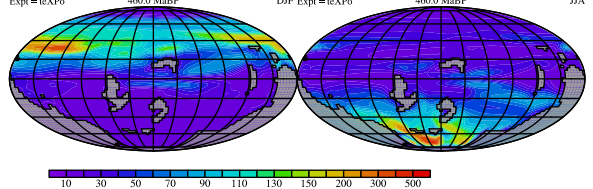

# Middle Ordovician (early Darwillian, 465 Ma)

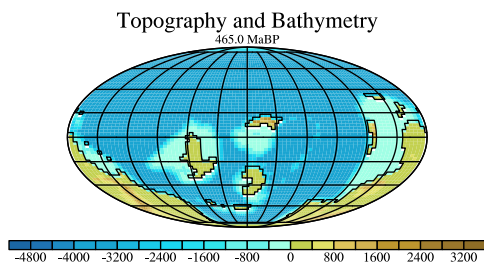

$\text{CO}_2 = 1770 \text{ ppmv}$

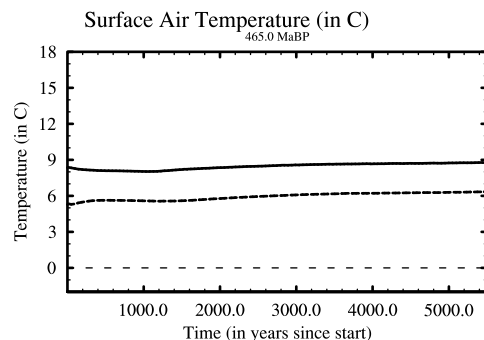

Surface Air Temperature (in C)  
Expt = teXYp 465.0 MaBP ANN

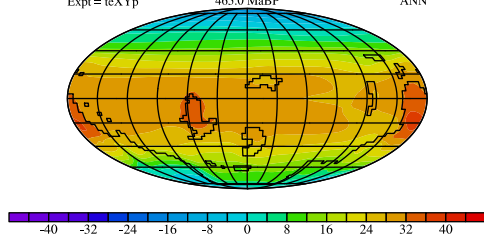

Precipitation (in mm/day)  
Expt = teXYp 465.0 MaBP ANN

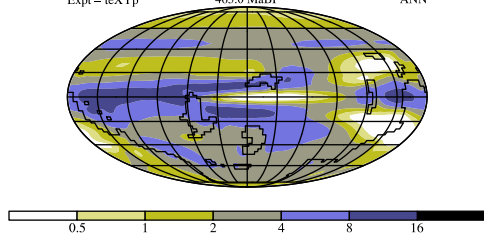

Potential Temperature (2731m, in C) Bottom Temperature (>1000m, in C)  
Expt = teXYp 465.0 MaBP ANN Expt = teXYp 000.0 MaBP ANN

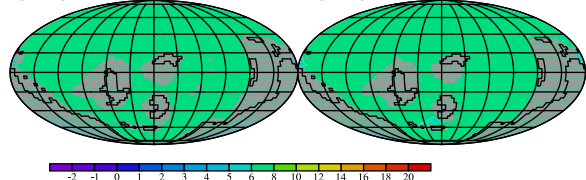

Mixed Layer depth (in m) Mixed Layer depth (in m)  
Expt = teXYp 465.0 MaBP DJF Expt = teXYp 465.0 MaBP JJA

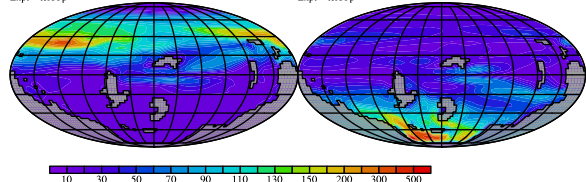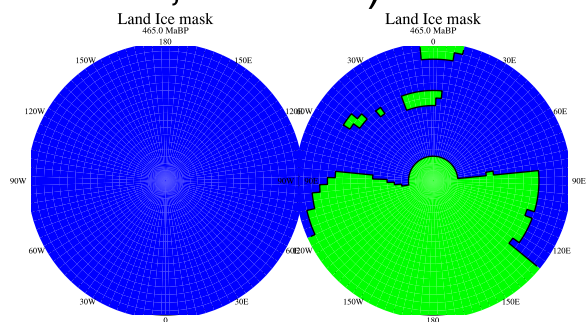

$\text{CO}_2 = 2111 \text{ ppmv}$

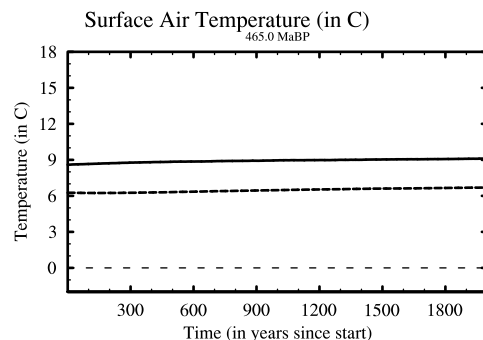

Surface Air Temperature (in C)  
Expt = teXPp 465.0 MaBP ANN

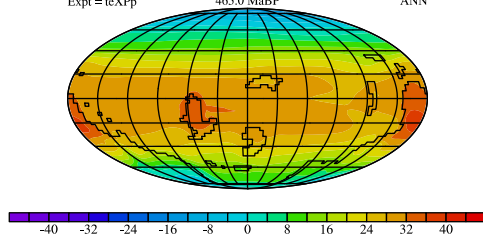

Precipitation (in mm/day)  
Expt = teXPp 465.0 MaBP ANN

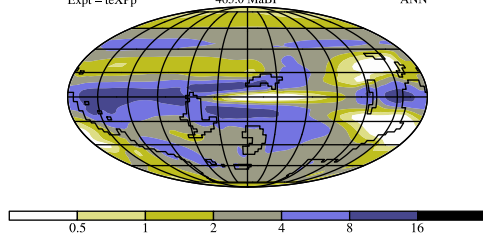

Potential Temperature (2731m, in C) Bottom Temperature (>1000m, in C)  
Expt = teXPp 465.0 MaBP ANN Expt = teXPp 000.0 MaBP ANN

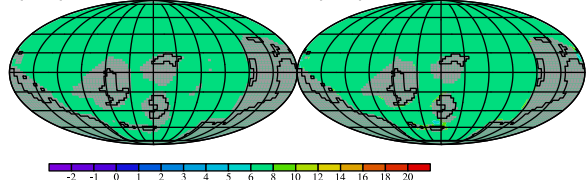

Mixed Layer depth (in m) Mixed Layer depth (in m)  
Expt = teXPp 465.0 MaBP DJF Expt = teXPp 465.0 MaBP JJA

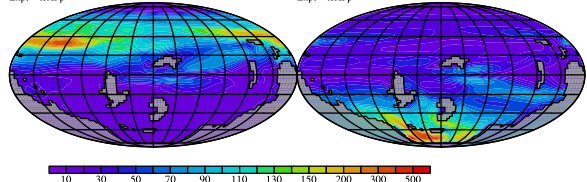



# Early Ordovician (Floian/Dapingian boundary, 470 Ma)

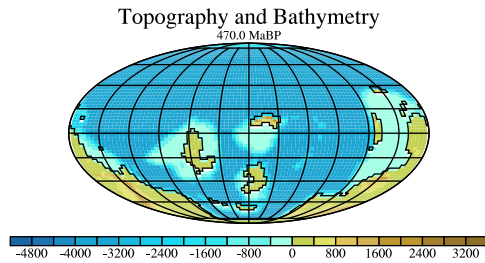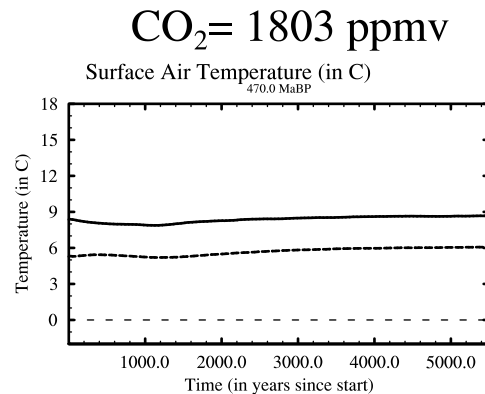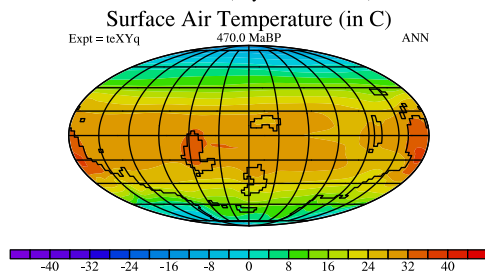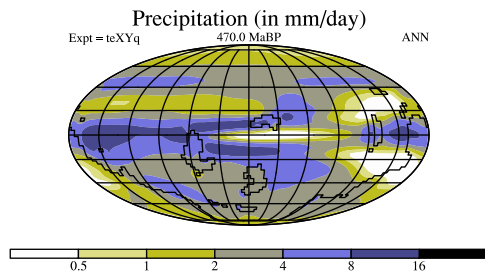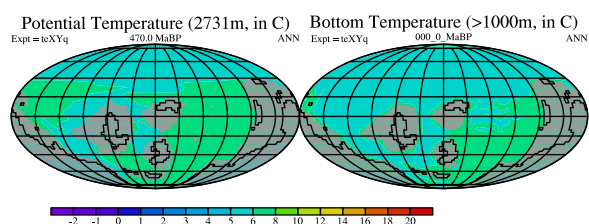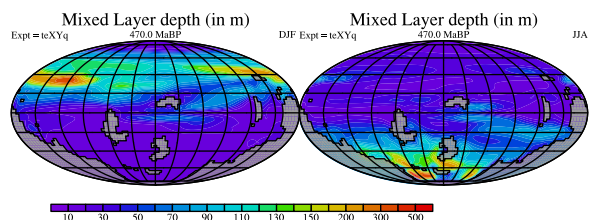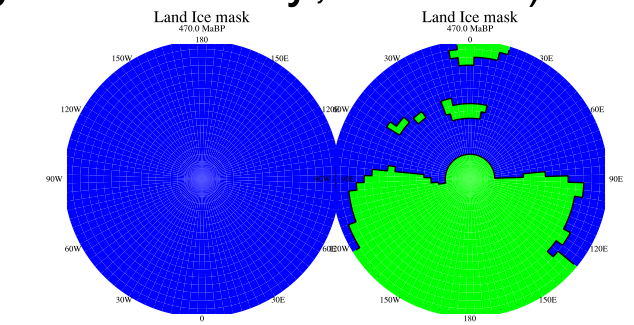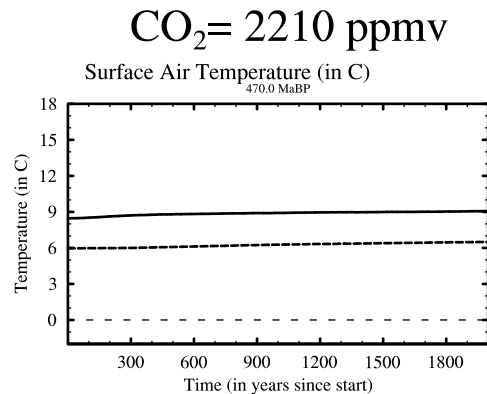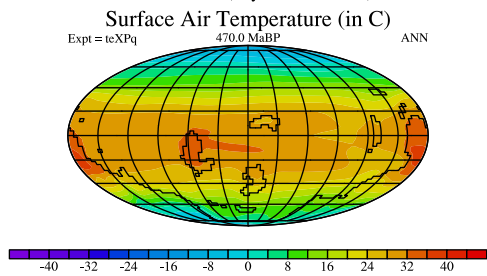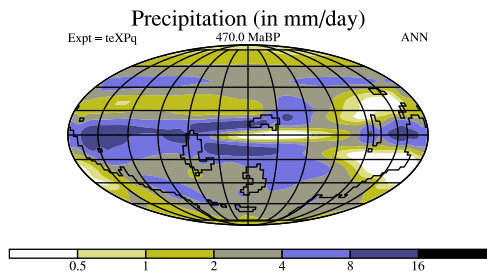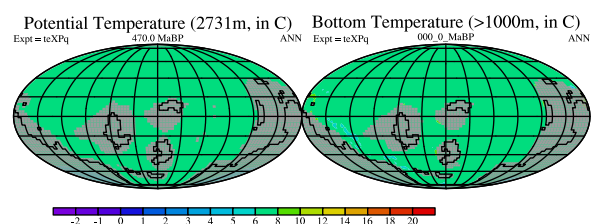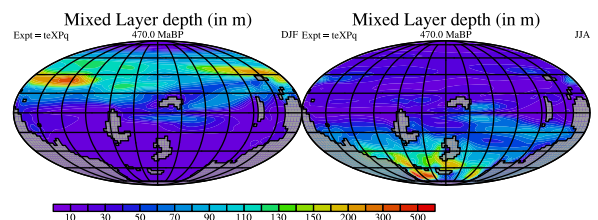

# Early Ordovician (late Early Floian, 475 Ma)

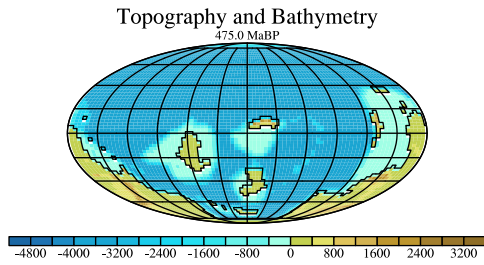

$\text{CO}_2 = 1836 \text{ ppmv}$

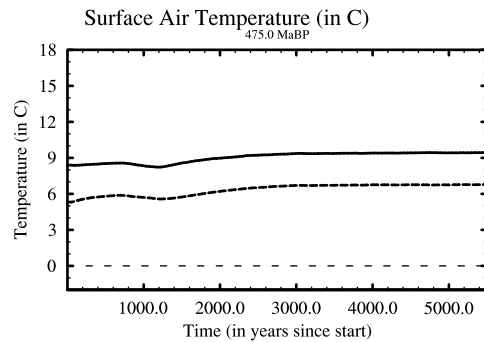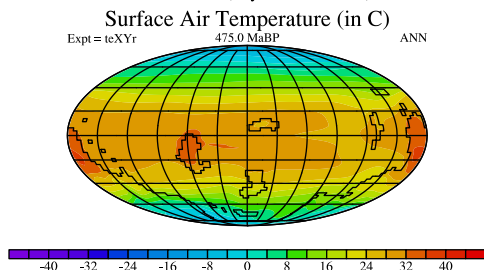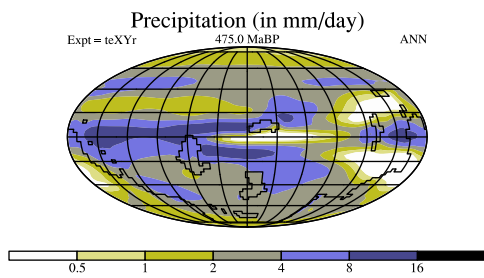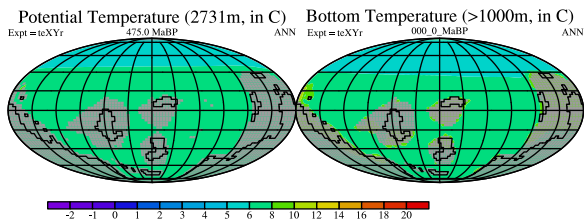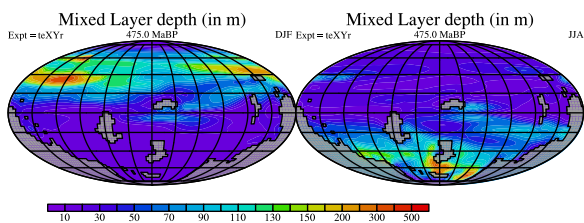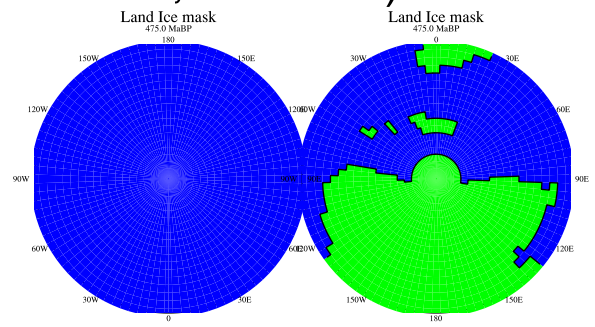

$\text{CO}_2 = 2308 \text{ ppmv}$

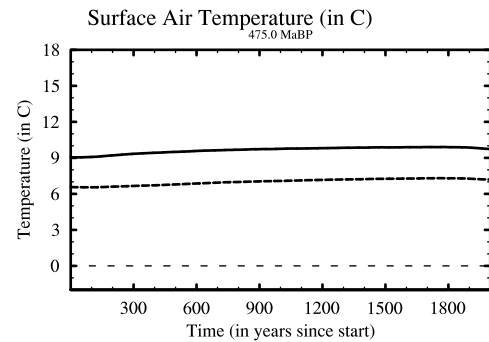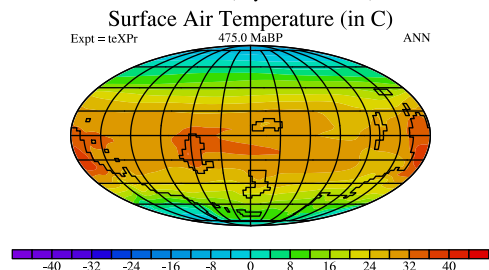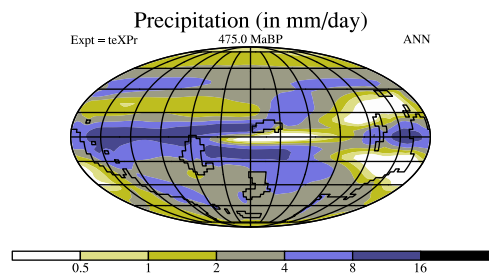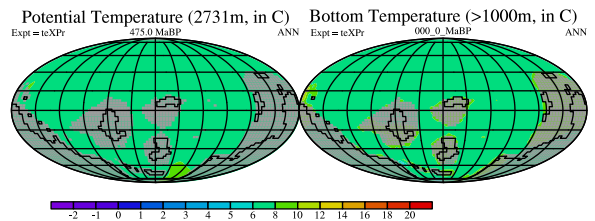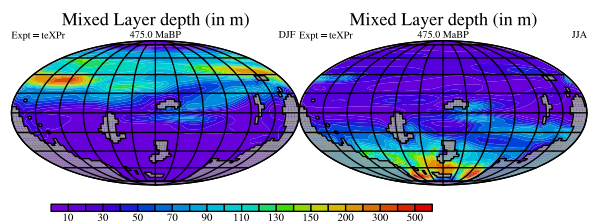

# Early Ordovician (Tremadoc, 481.6 Ma)

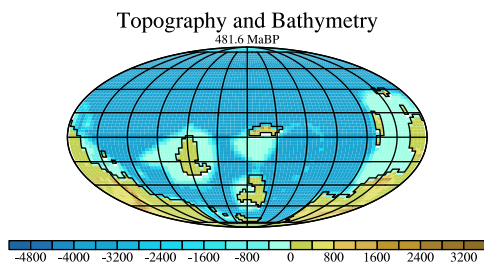

$\text{CO}_2 = 1879 \text{ ppmv}$

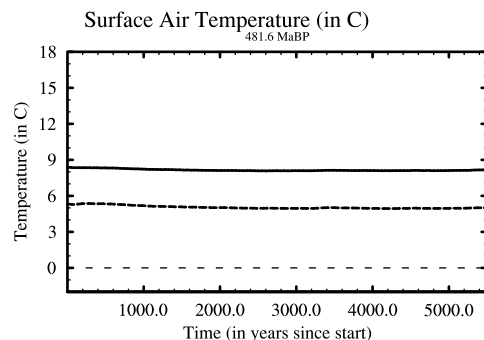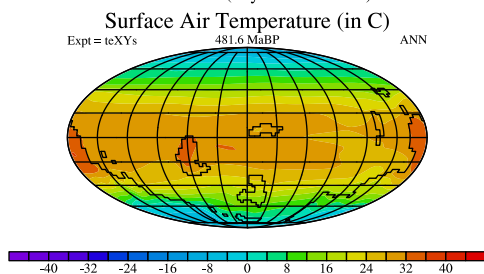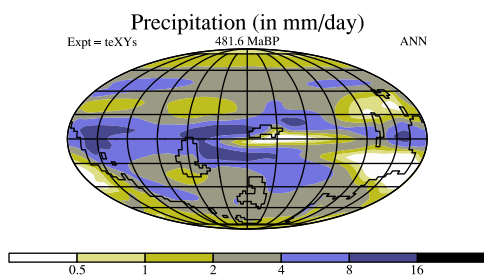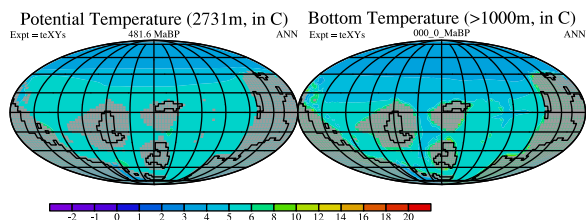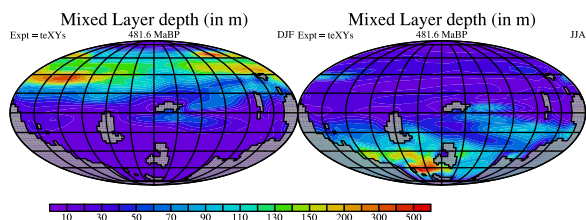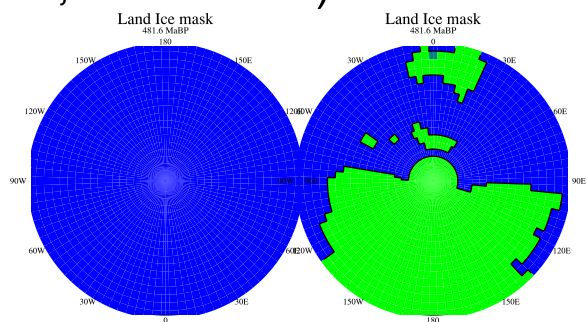

$\text{CO}_2 = 2438 \text{ ppmv}$

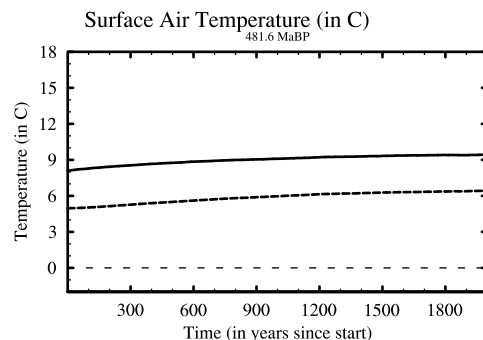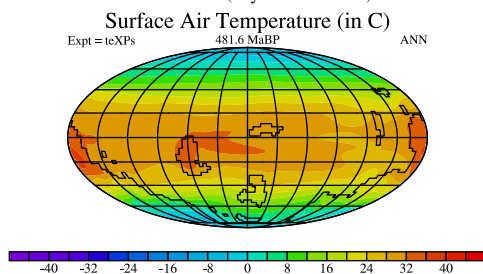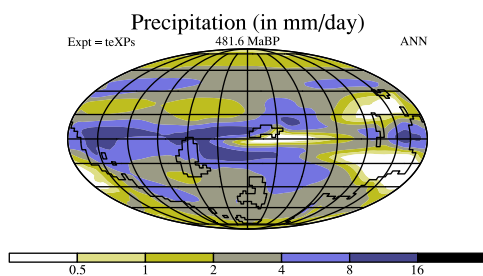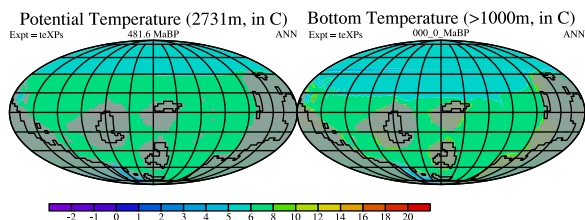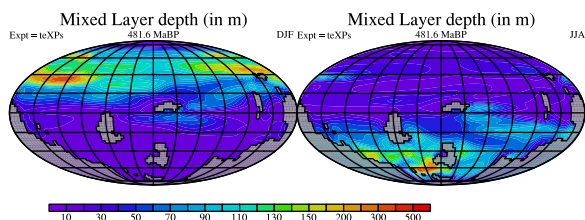



# Cambro-Ordovician Boundary (485.4 Ma)

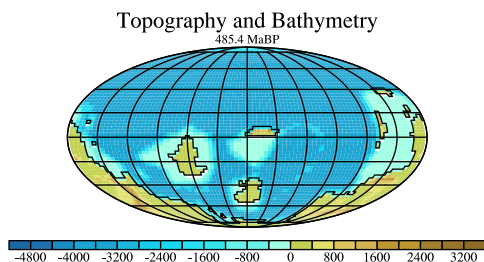

CO<sub>2</sub> = 1904 ppmv

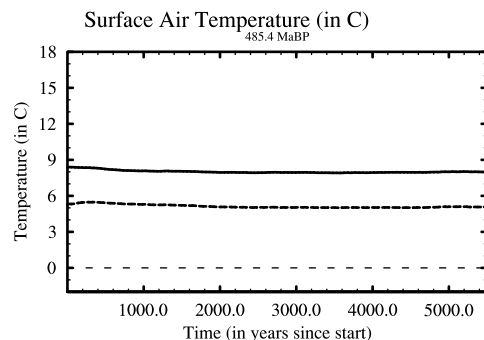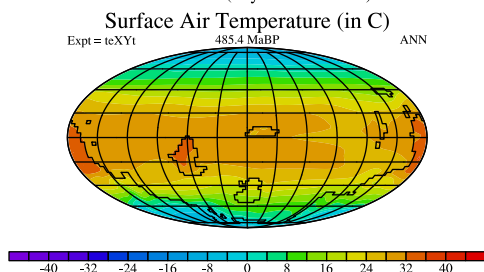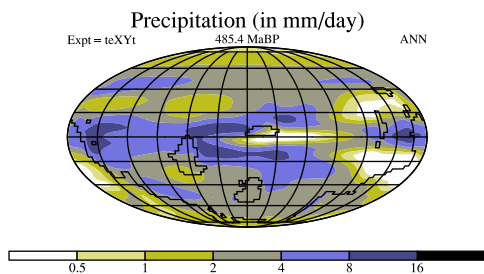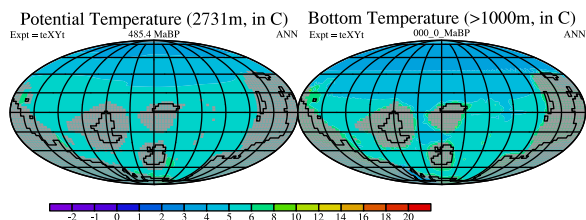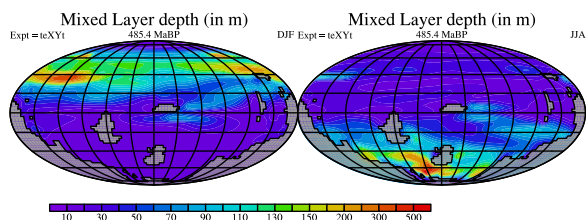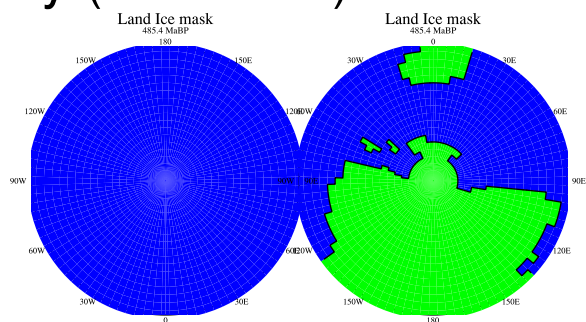

CO<sub>2</sub> = 2513 ppmv

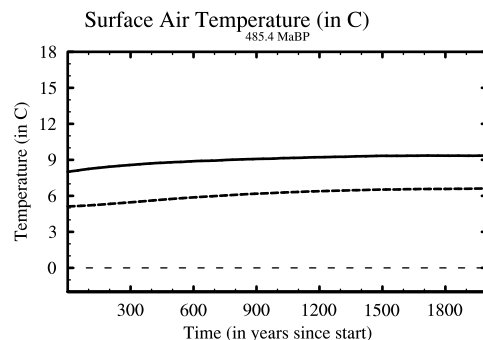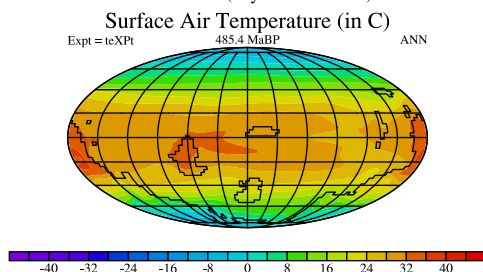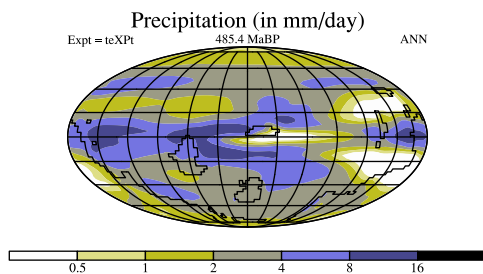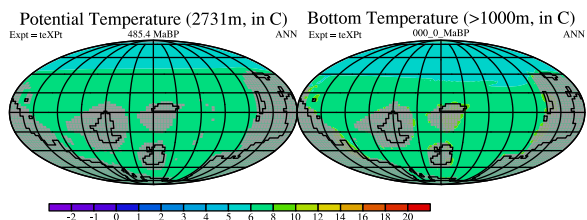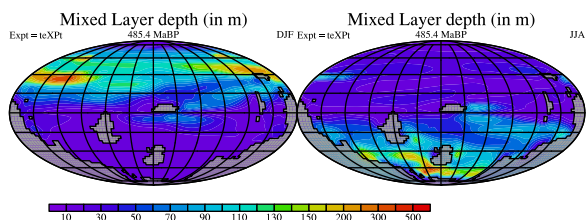

# Late Cambrian (Jiangshanian, 491.8 Ma)

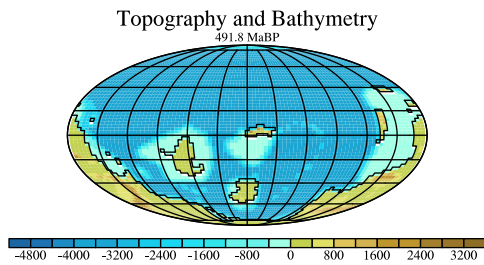

CO<sub>2</sub> = 1946 ppmv

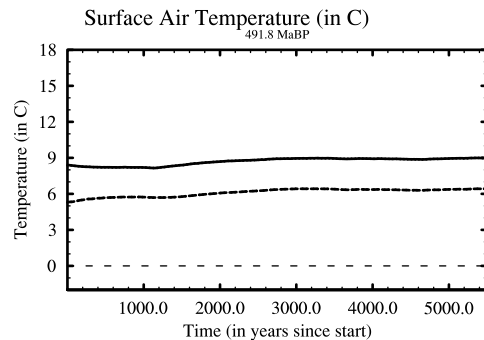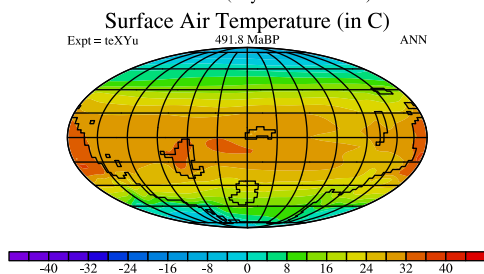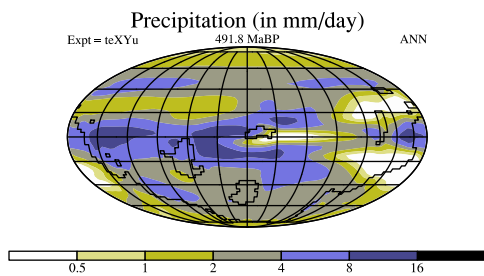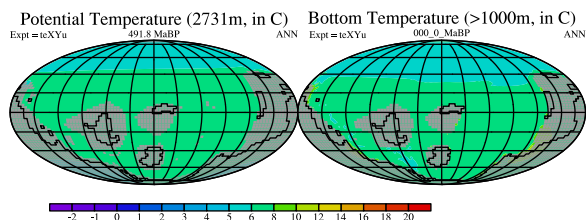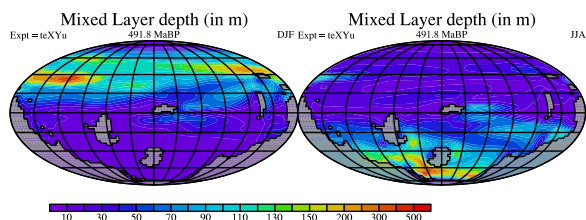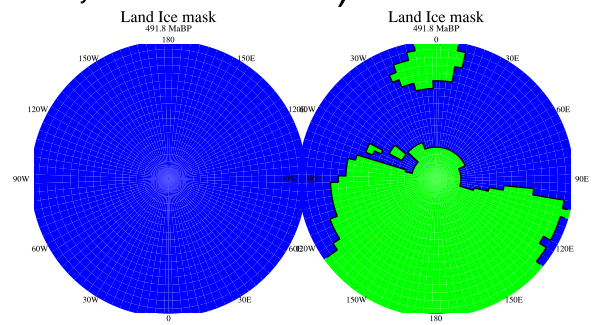

CO<sub>2</sub> = 2639 ppmv

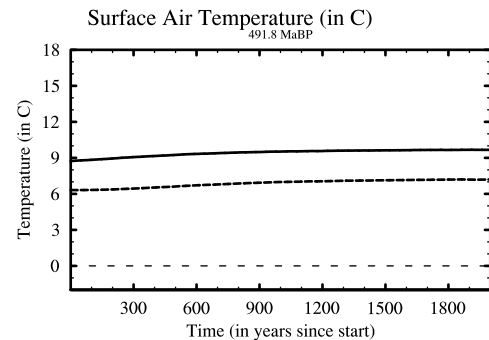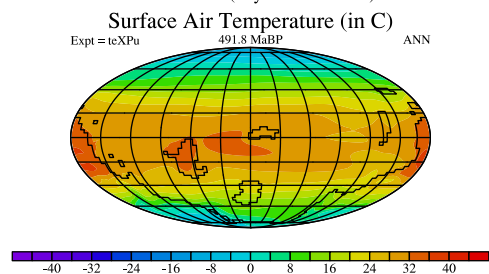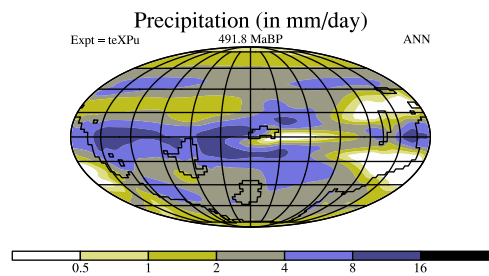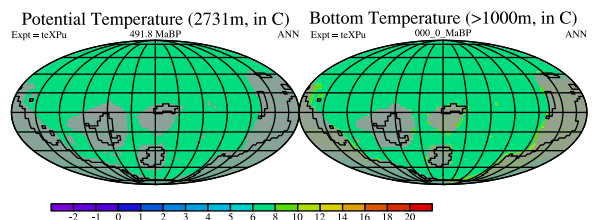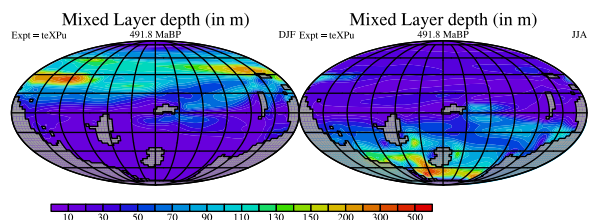

# Late Cambrian (Pabian, 495.5 Ma)

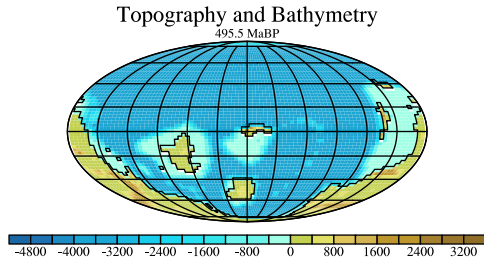

CO<sub>2</sub> = 1970 ppmv

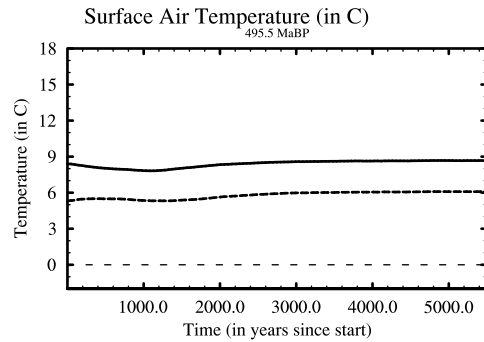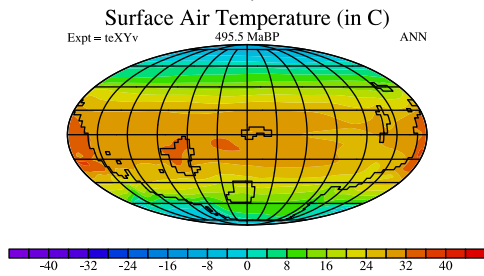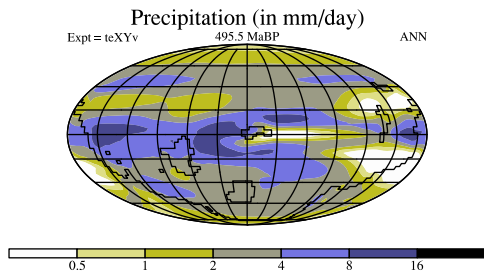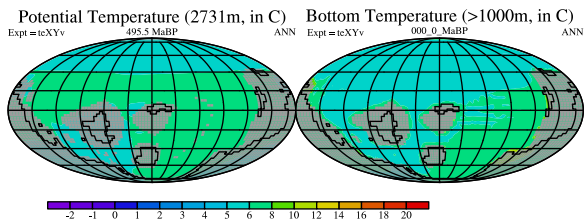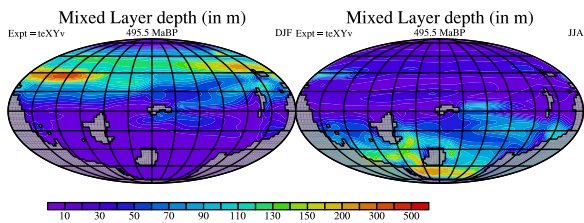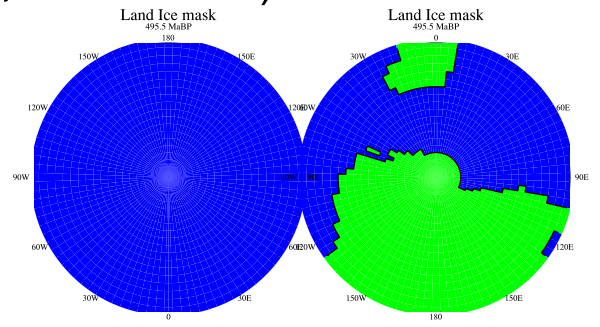

CO<sub>2</sub> = 2711 ppmv

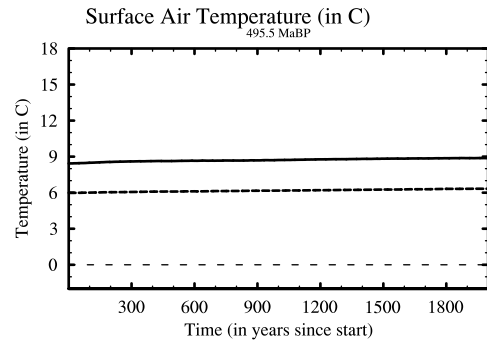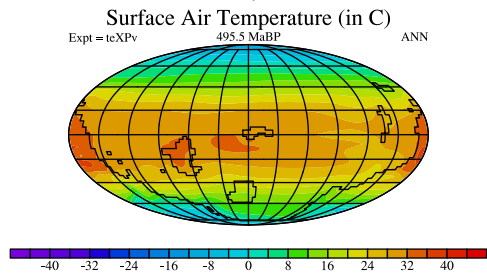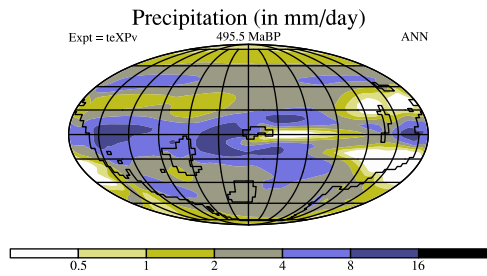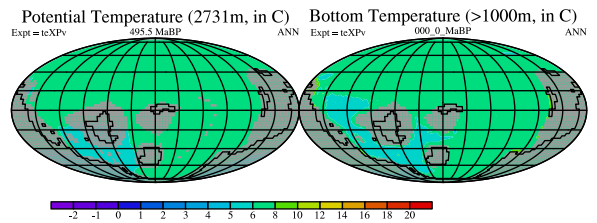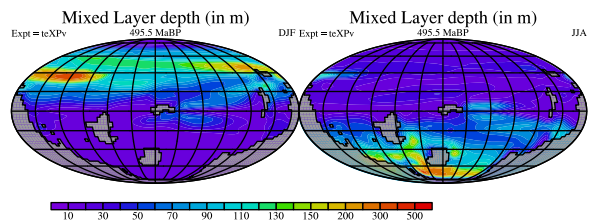



# late Middle Cambrian (Guzhangian, 498.8 Ma)

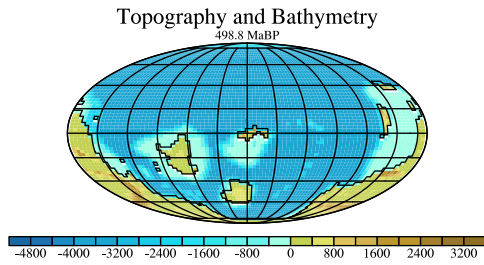

CO<sub>2</sub> = 1992 ppmv

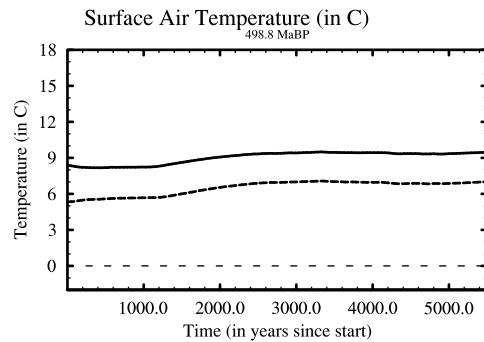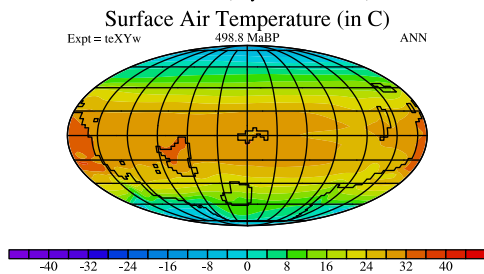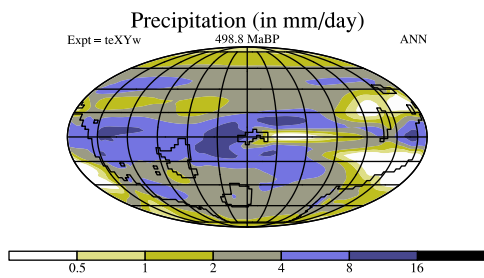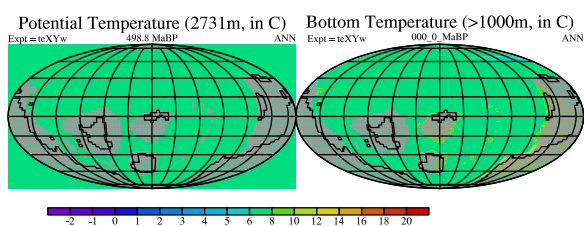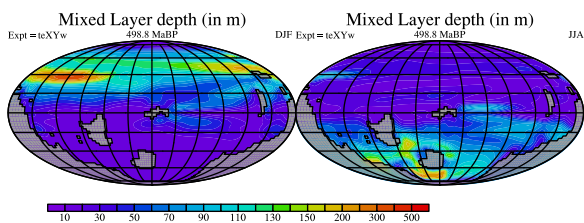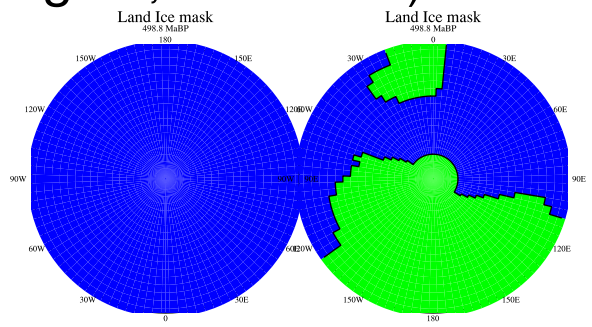

CO<sub>2</sub> = 2776 ppmv

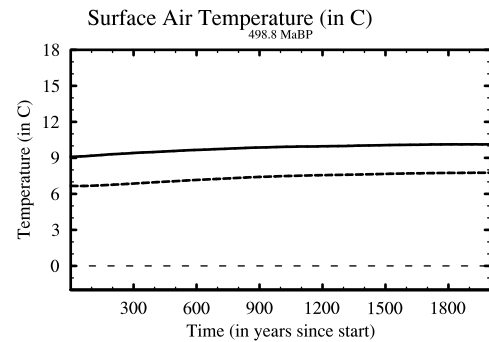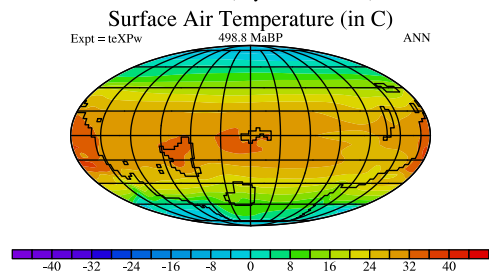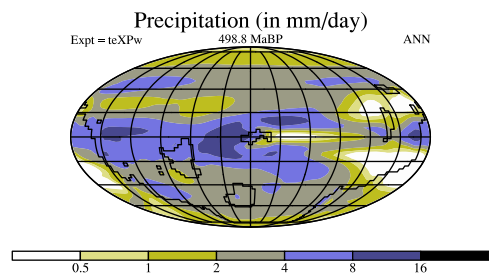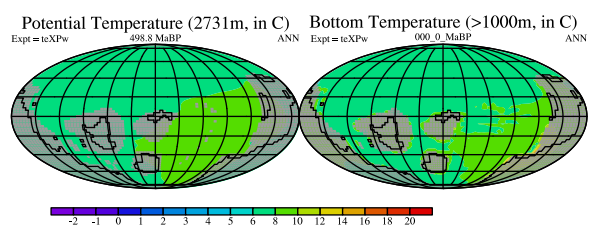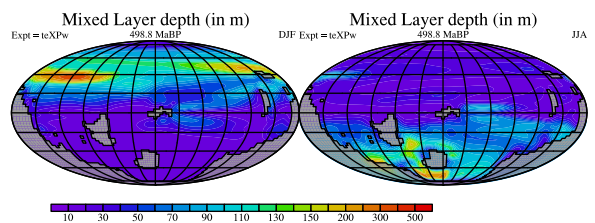

# late Middle Cambrian (early Epoch 3, 505 Ma)

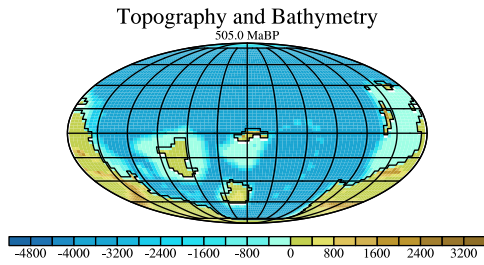

CO<sub>2</sub> = 2020 ppmv

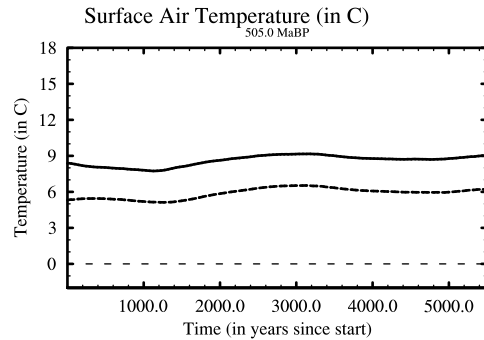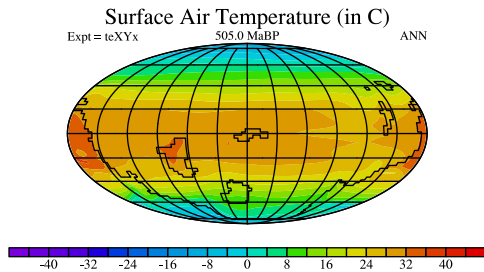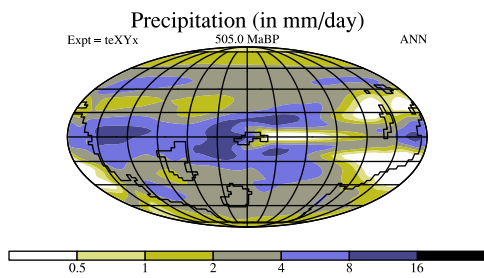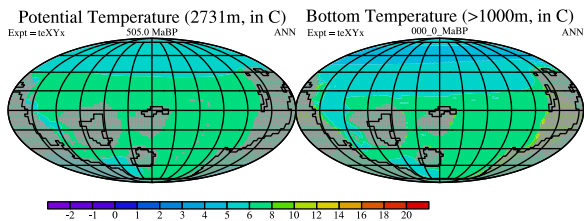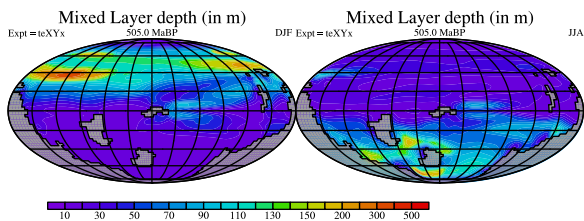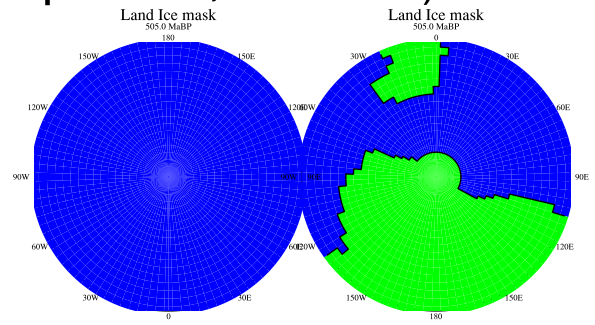

CO<sub>2</sub> = 2870 ppmv

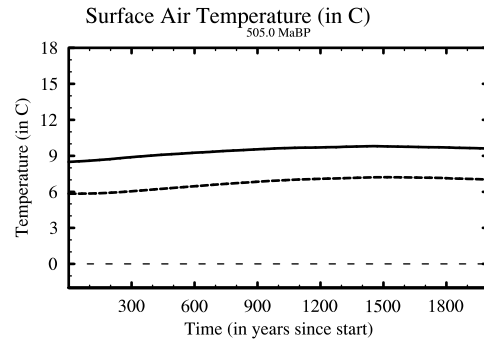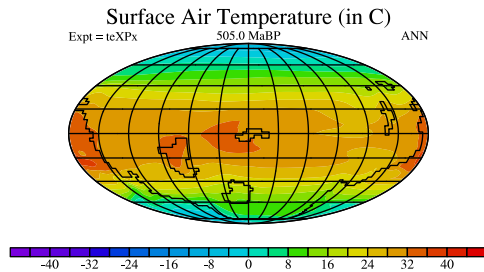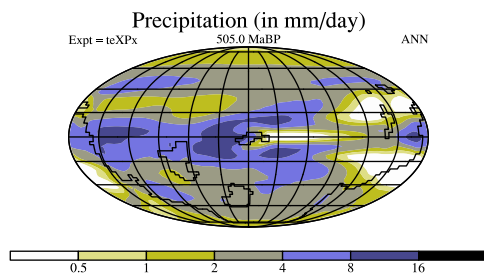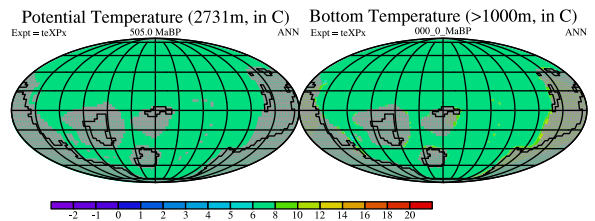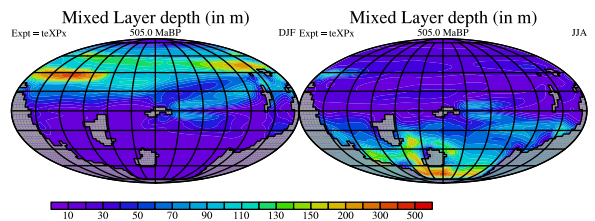

# early Middle Cambrian (late Epoch 2, 510 Ma)

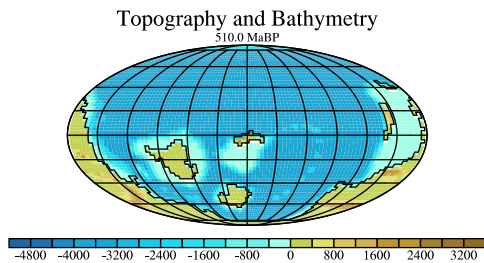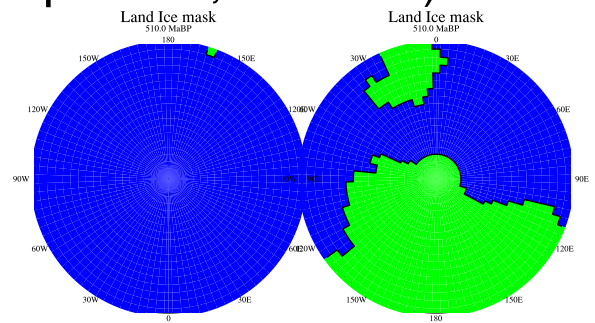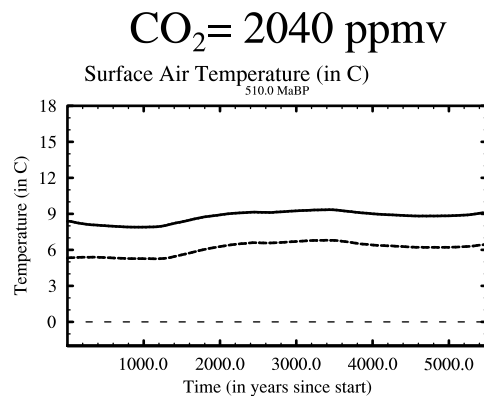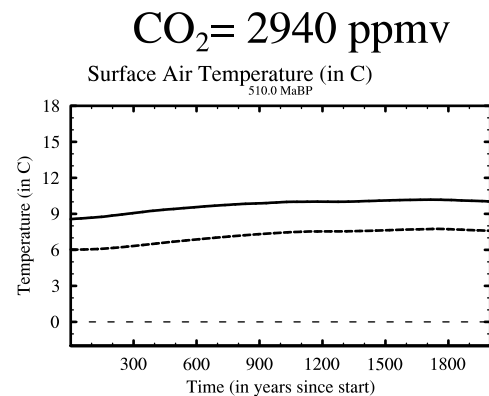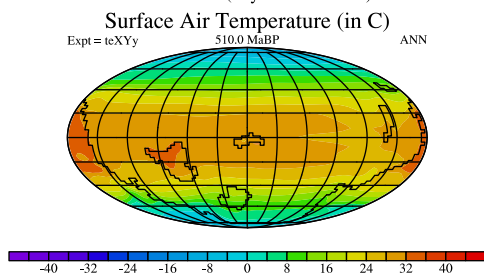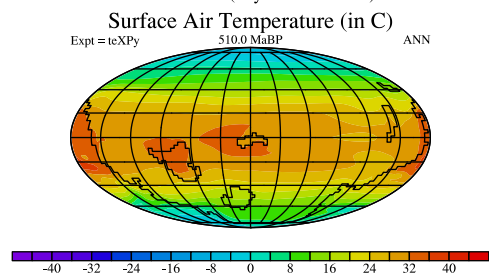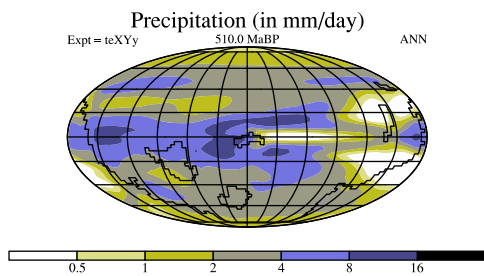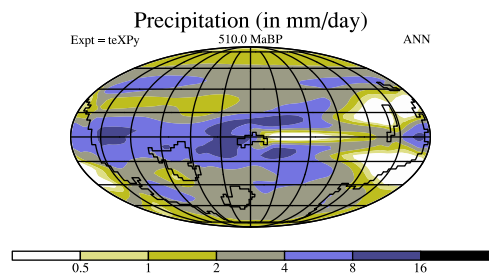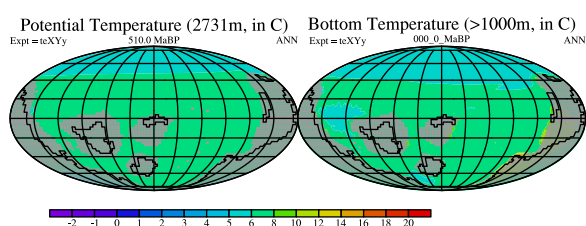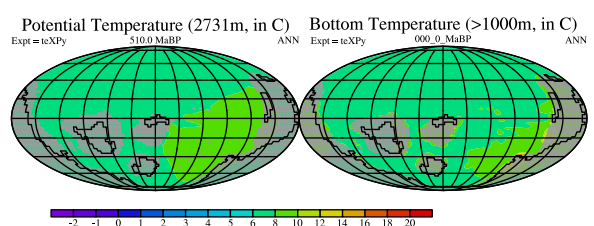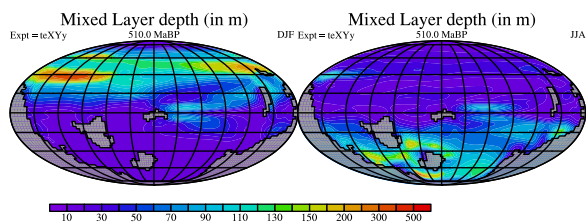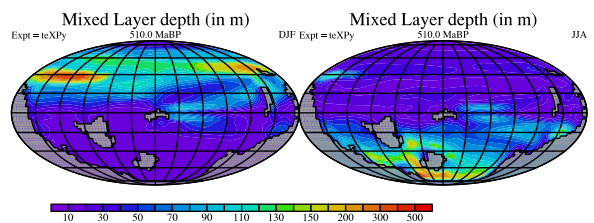



# early Middle Cambrian (middle Epoch 2, 515 Ma)

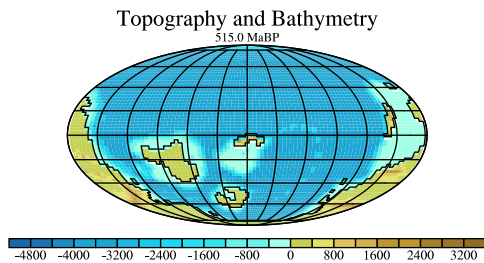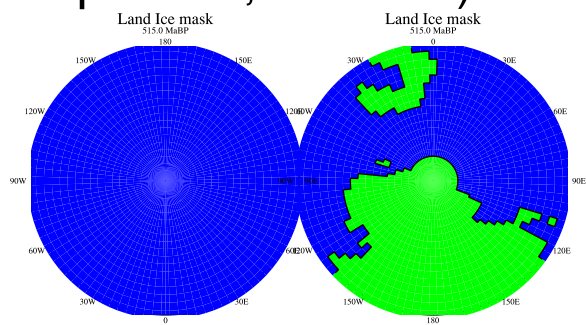

$\text{CO}_2 = 2060 \text{ ppmv}$

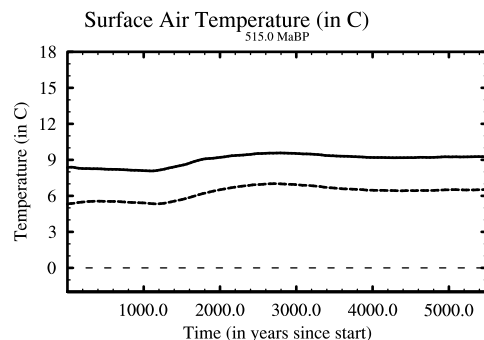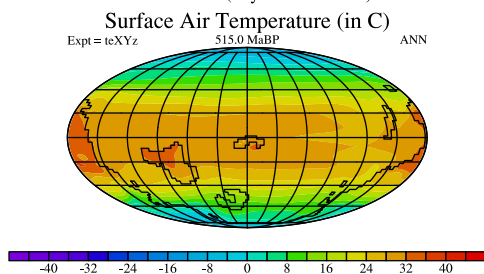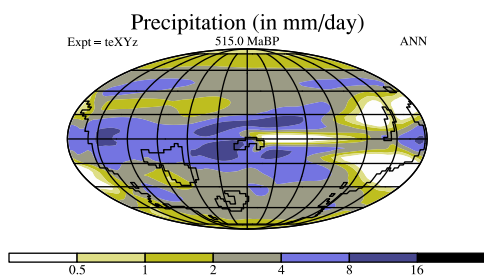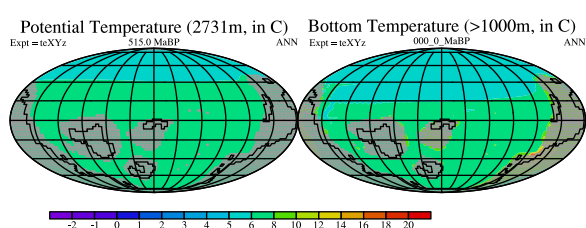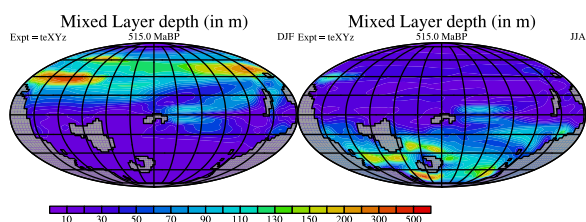

$\text{CO}_2 = 3010 \text{ ppmv}$

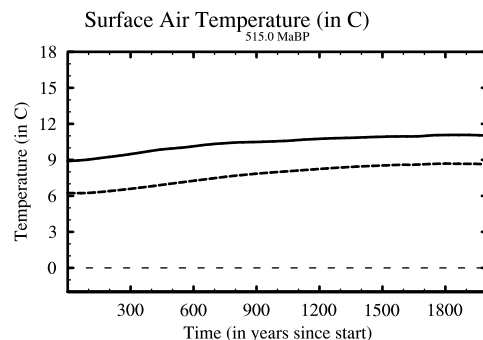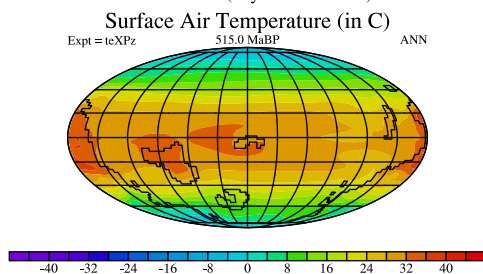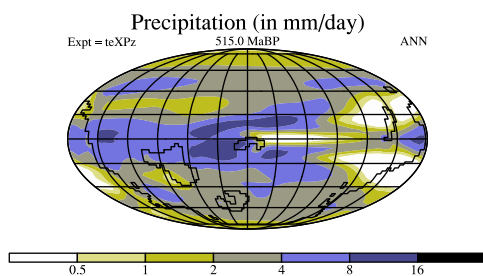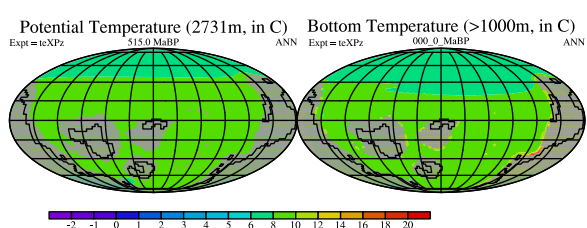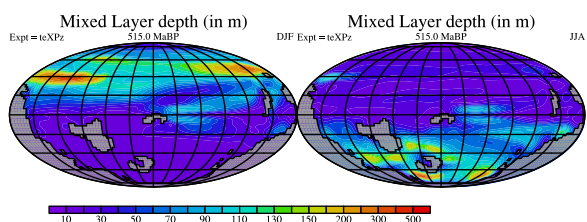

# Early/Middle Cambrian boundary (520 Ma)

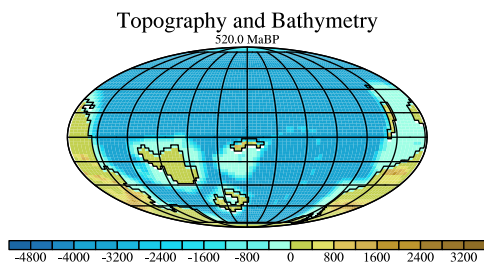

CO<sub>2</sub> = 2080 ppmv

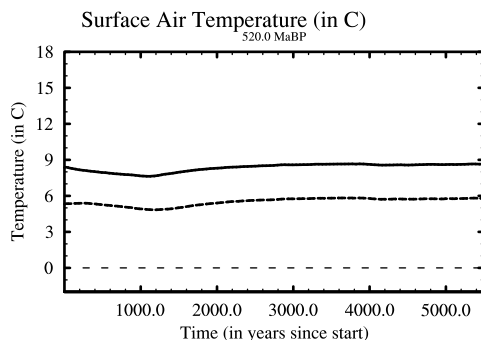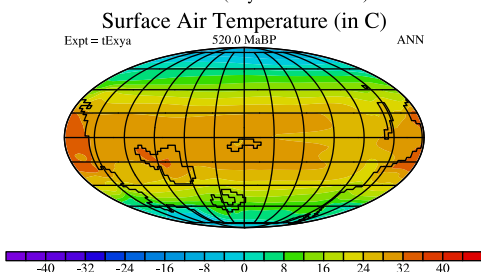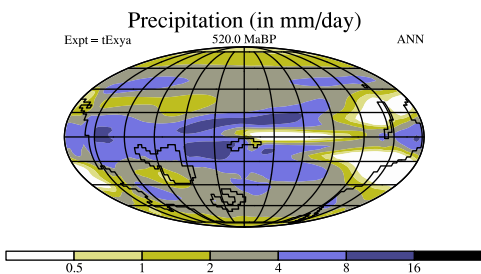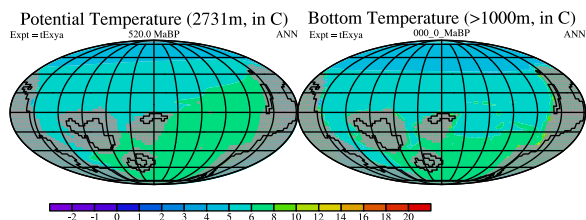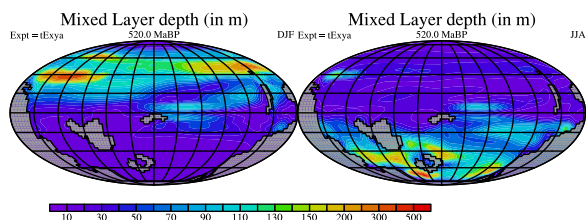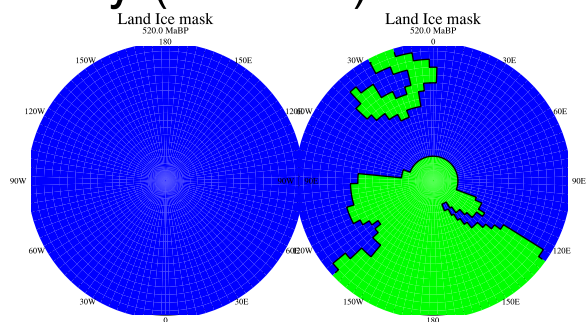

CO<sub>2</sub> = 3080 ppmv

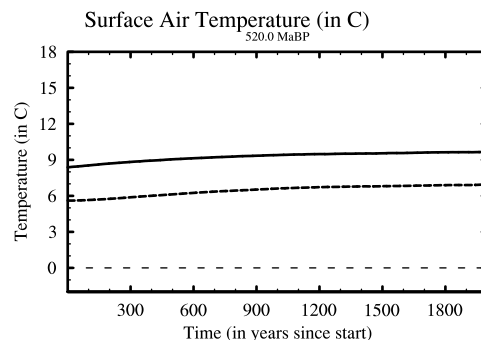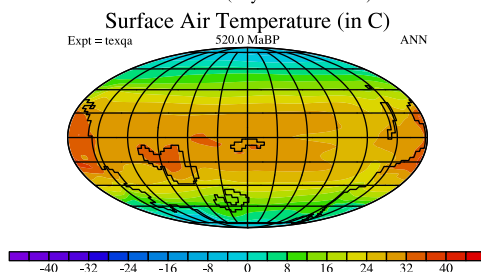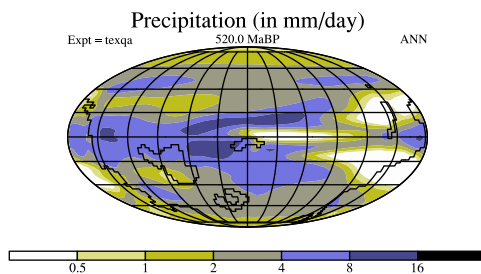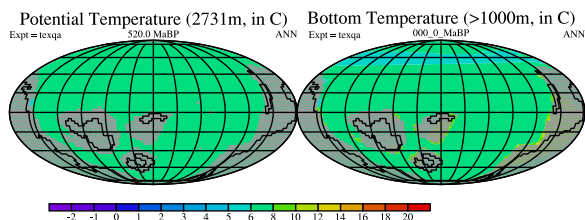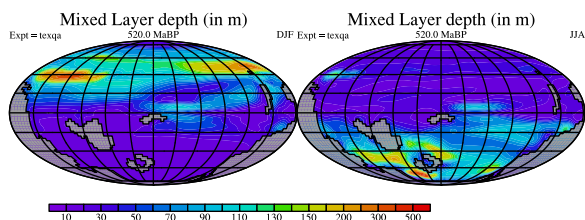

# Early Cambrian (late Terreneuvian, 525 Ma)

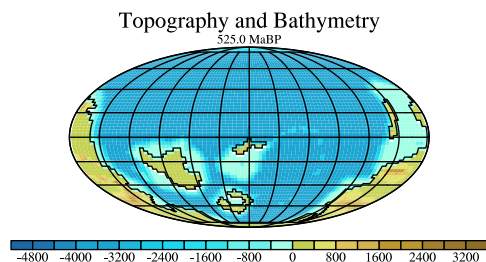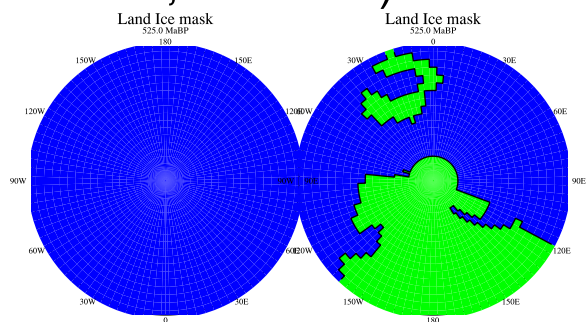

$\text{CO}_2 = 2100 \text{ ppmv}$

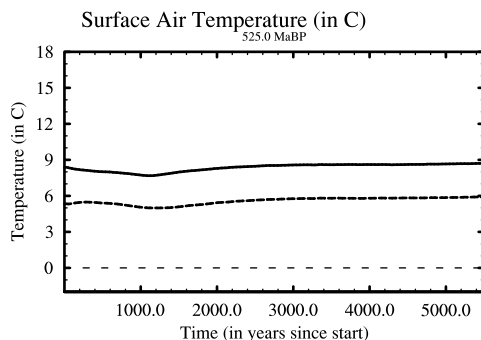

$\text{CO}_2 = 3150 \text{ ppmv}$

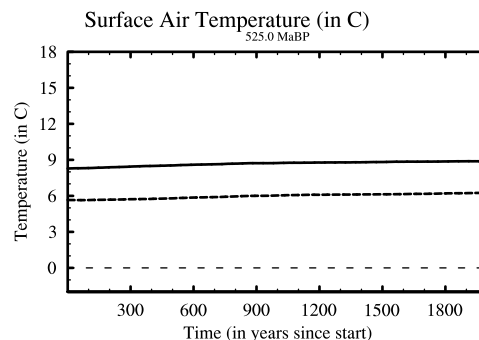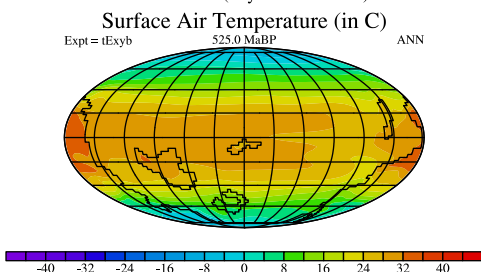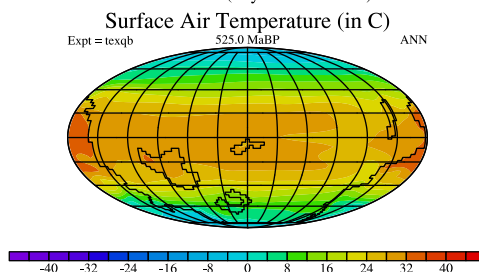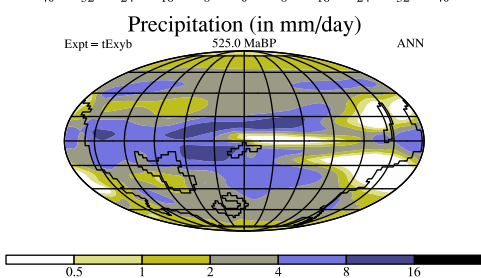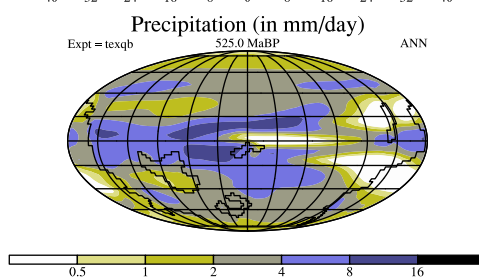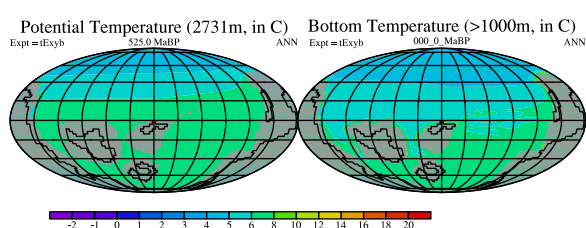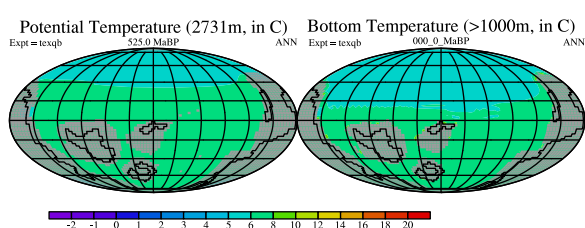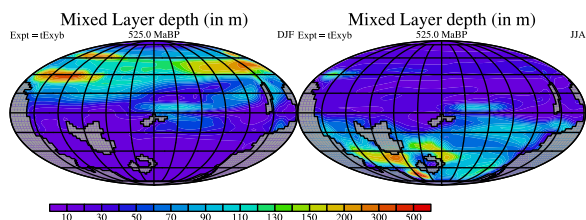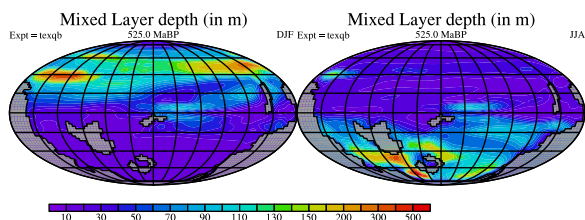



# Early Cambrian (middle Terreneuvian, 530 Ma)

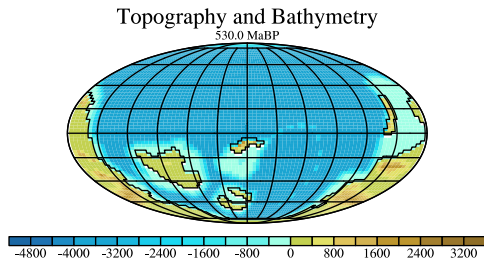

$\text{CO}_2 = 2120 \text{ ppmv}$

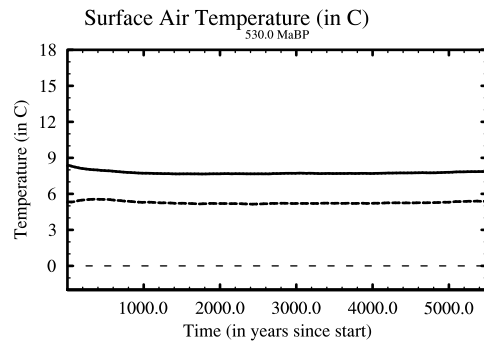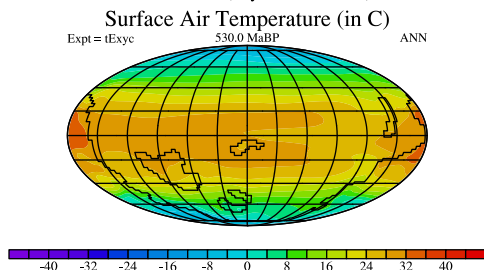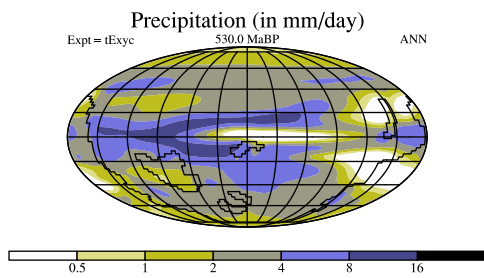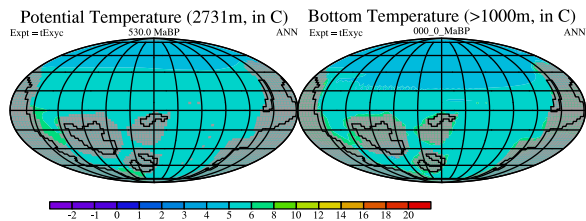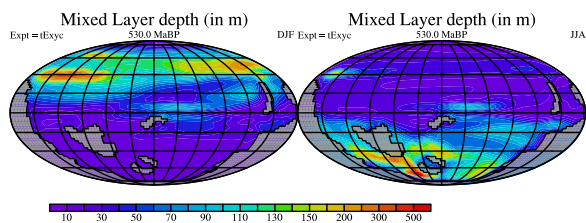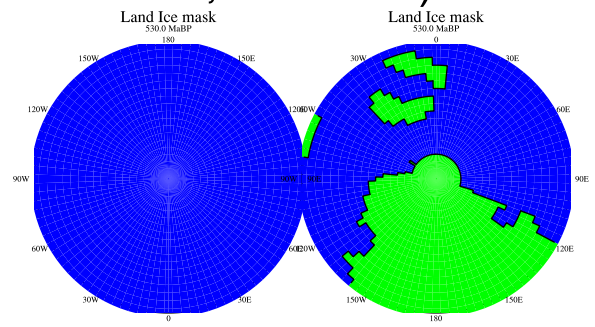

$\text{CO}_2 = 3220 \text{ ppmv}$

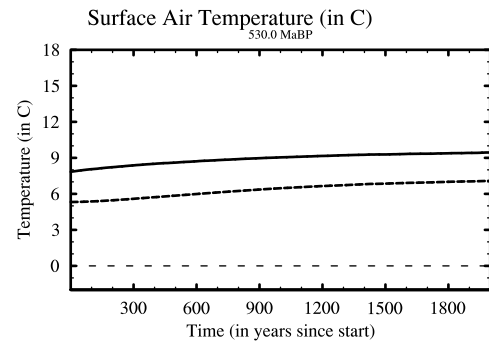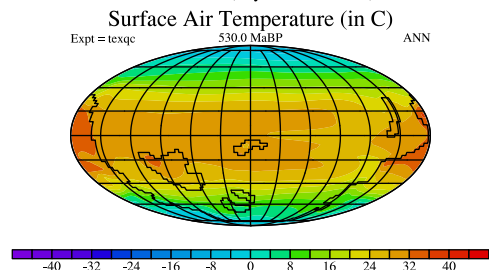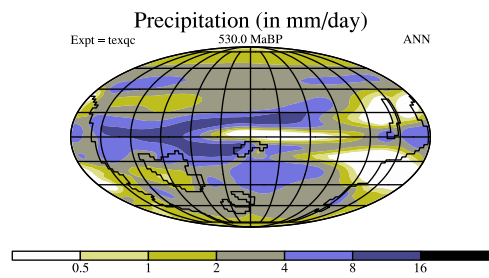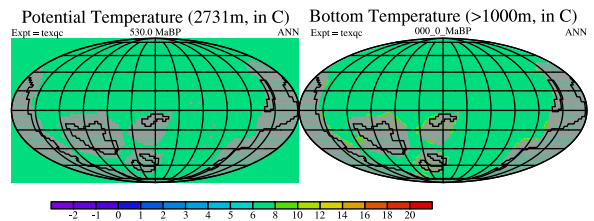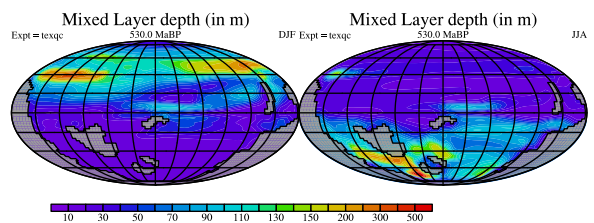

# Early Cambrian (early Terreneuvian, 535 Ma)

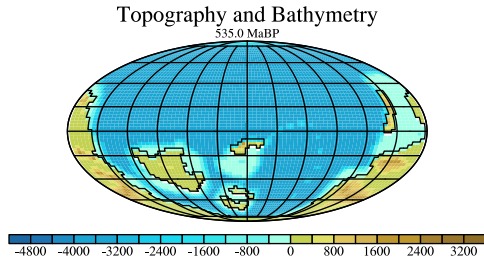

$\text{CO}_2 = 2140 \text{ ppmv}$

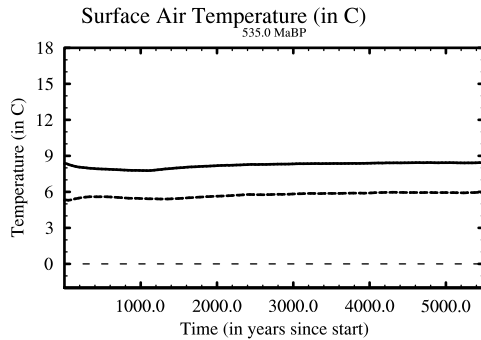

Surface Air Temperature (in C)  
Expt = tExyd 535.0 MaBP ANN

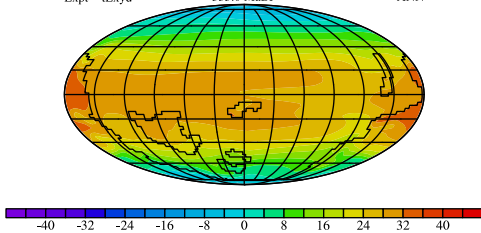

Precipitation (in mm/day)  
Expt = tExyd 535.0 MaBP ANN

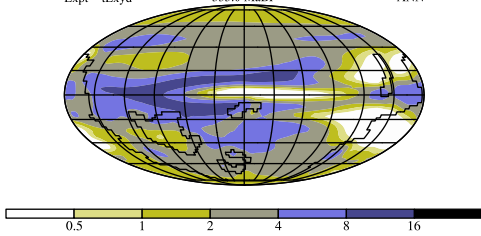

Potential Temperature (2731m, in C) Bottom Temperature (>1000m, in C)  
Expt = tExyd 535.0 MaBP ANN Expt = tExyd 000.0 MaBP ANN

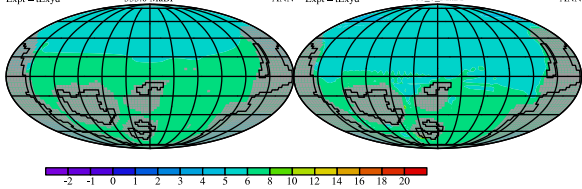

Mixed Layer depth (in m) DJF Expt = tExyd 535.0 MaBP JJA

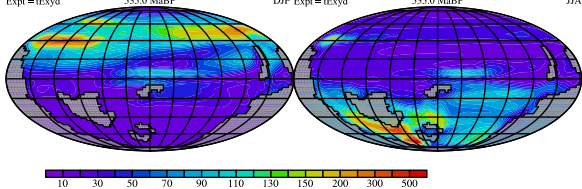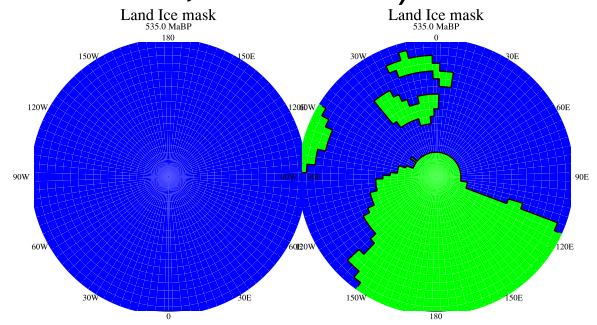

$\text{CO}_2 = 3290 \text{ ppmv}$

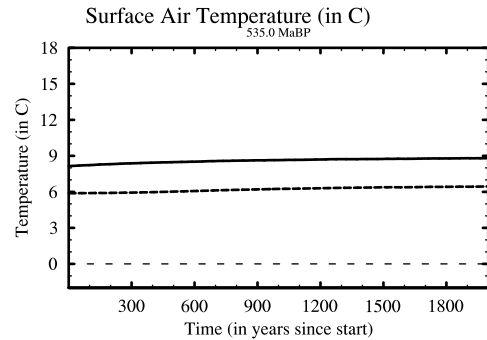

Surface Air Temperature (in C)  
Expt = texqd 535.0 MaBP ANN

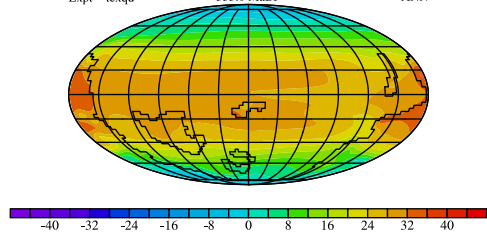

Precipitation (in mm/day)  
Expt = texqd 535.0 MaBP ANN

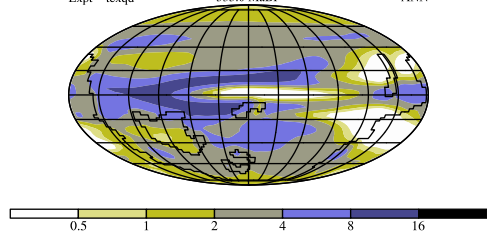

Potential Temperature (2731m, in C) Bottom Temperature (>1000m, in C)  
Expt = texqd 535.0 MaBP ANN Expt = texqd 000.0 MaBP ANN

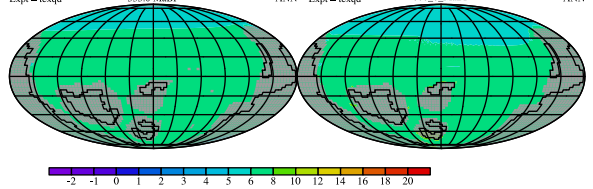

Mixed Layer depth (in m) DJF Expt = texqd 535.0 MaBP JJA

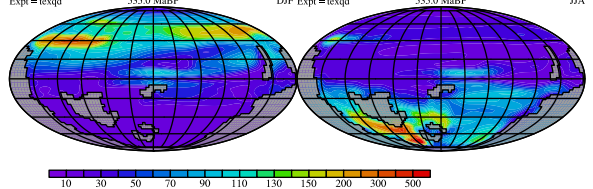

# Cambrian/Precambrian boundary (541 Ma)

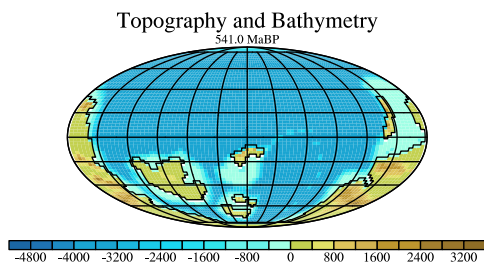

$\text{CO}_2 = 2164 \text{ ppmv}$

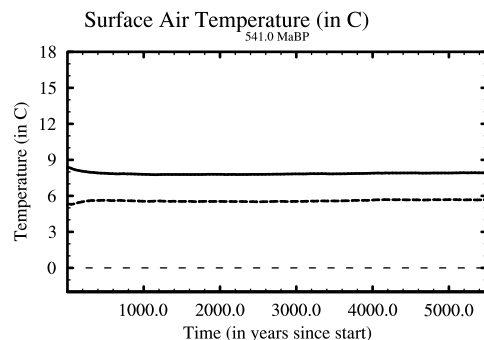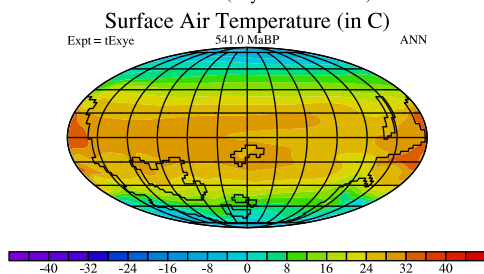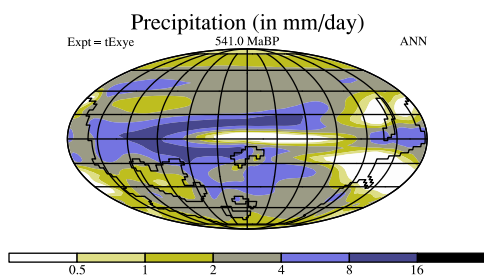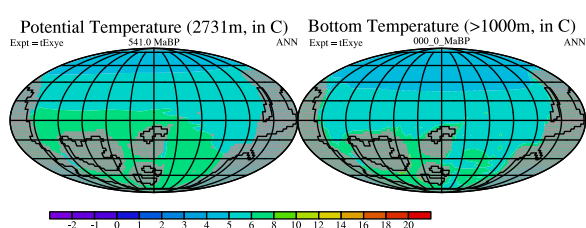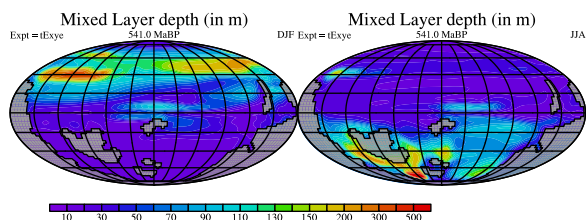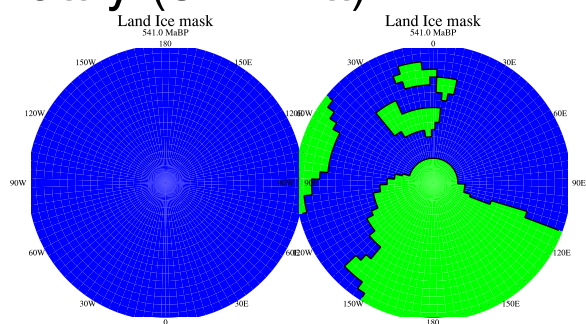

$\text{CO}_2 = 3374 \text{ ppmv}$

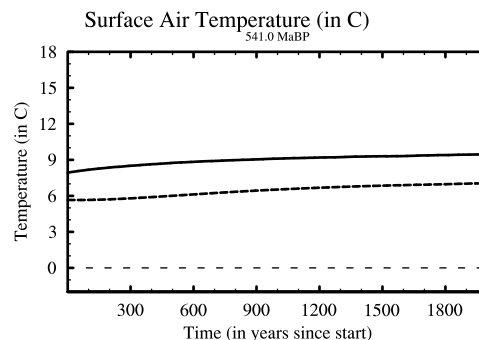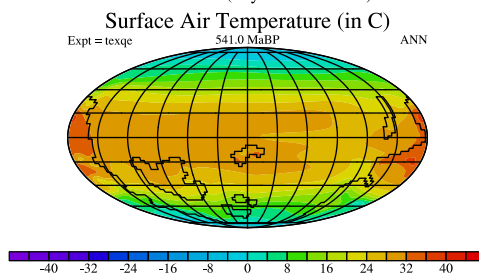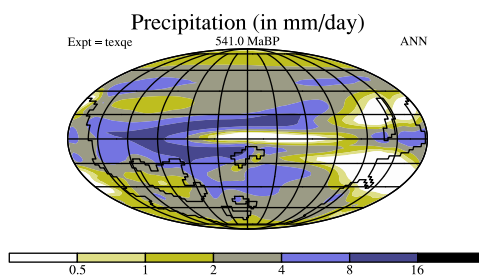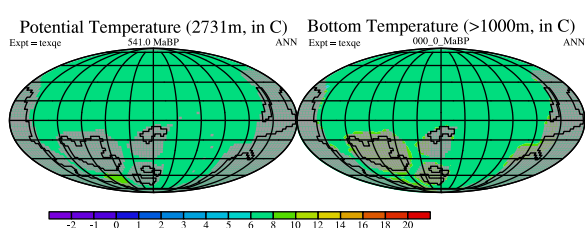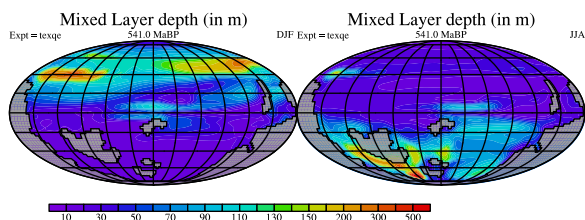



# Ocean Heat Transport

The following pages shows the latitudinal heat transport for the Foster CO<sub>2</sub> simulations. The first page shows the present day heat transport. Subsequent pages show all 108 other simulations as a change, relative to the present day transport. The date of the simulations is shown in the middle of the title.

The green line shows the total heat transport, the blue line shows the atmospheric transport, and the black line shows the ocean transport.

Access to many more climate variables is available via the website:

[https://www.paleo.bristol.ac.uk/ummodel/scripts/papers/Valdes et al 2021.html](https://www.paleo.bristol.ac.uk/ummodel/scripts/papers/Valdes_et_al_2021.html)

# Latitudinal Heat Transport

(Zonal mean)

000\_0\_MaBP

Expt = texpa1

ANN

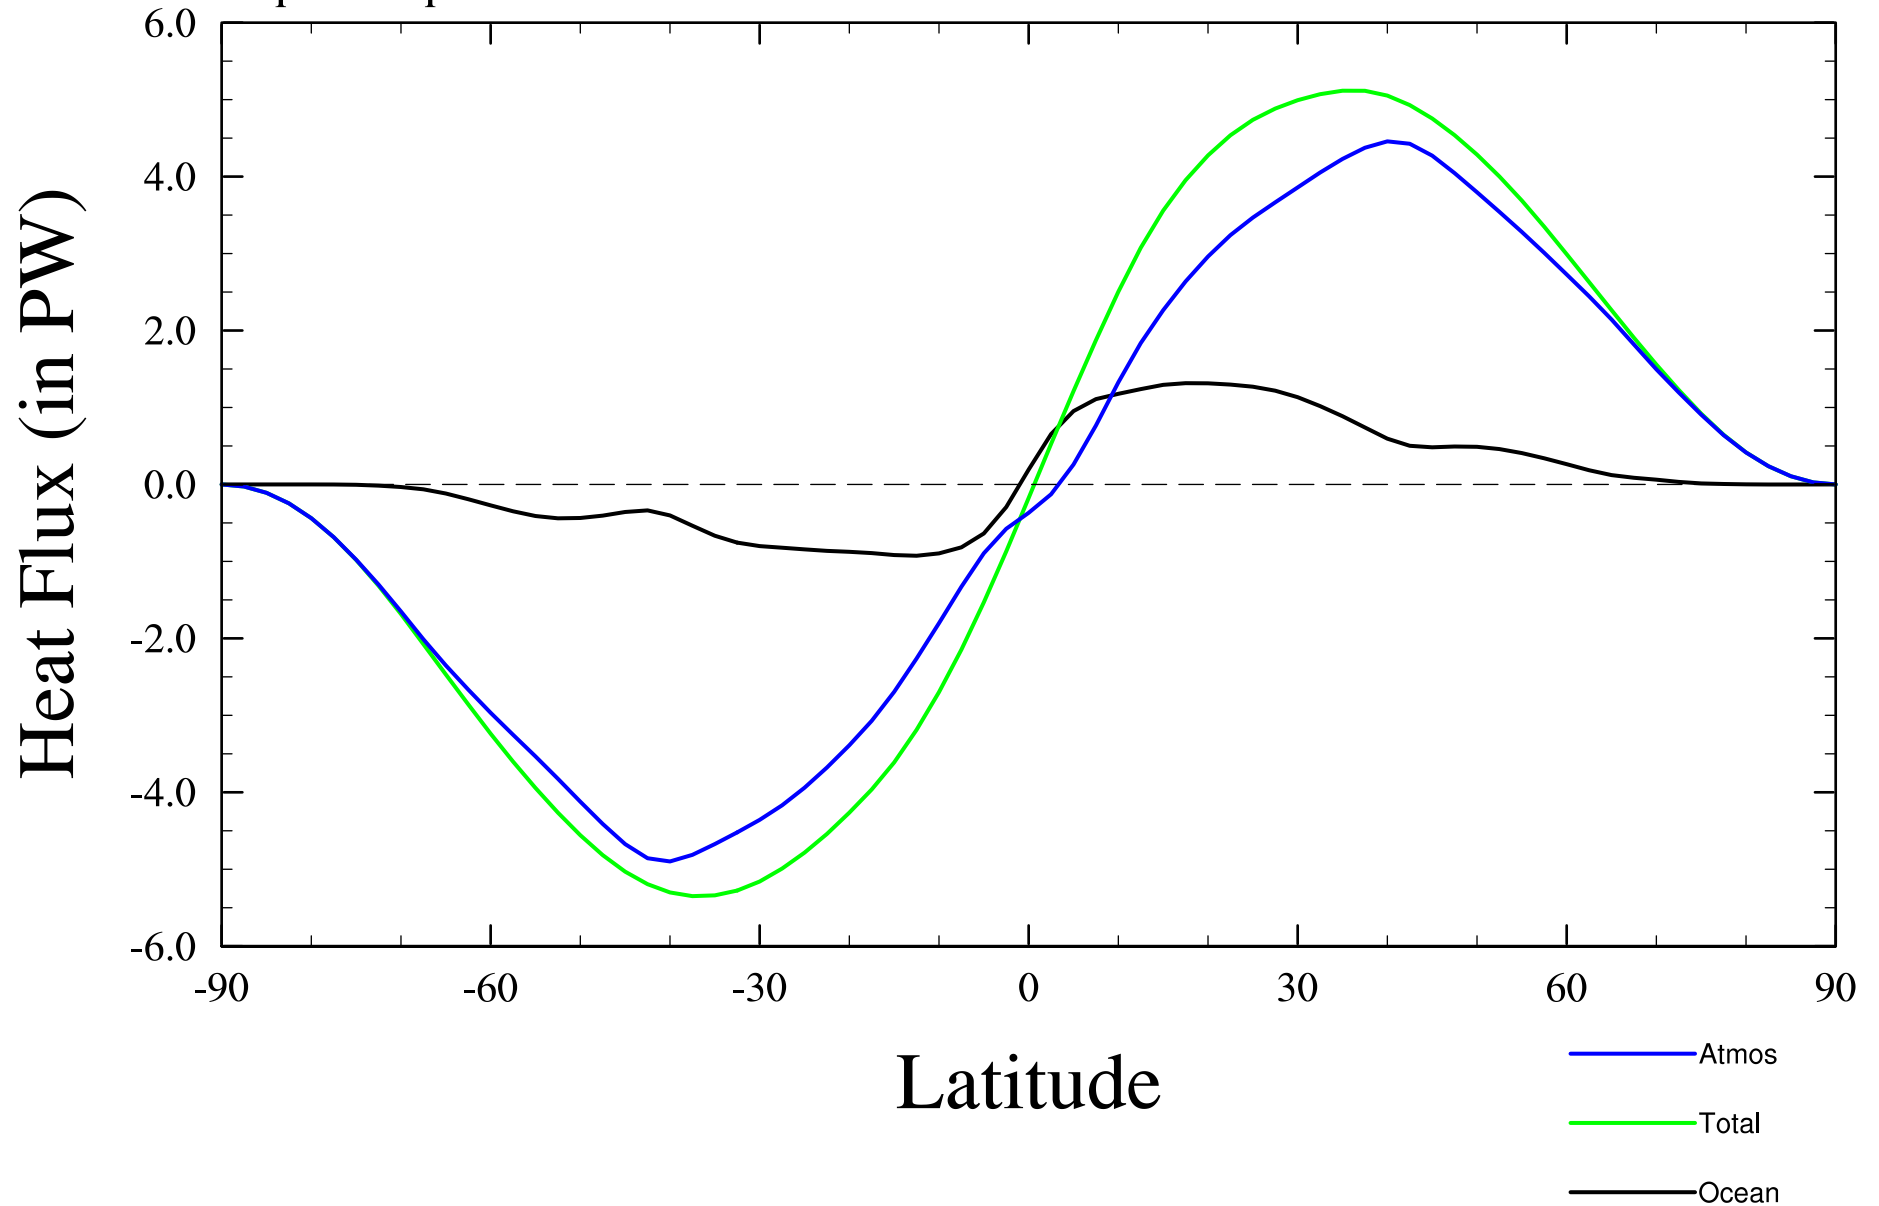

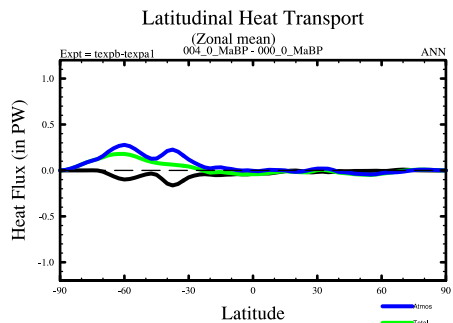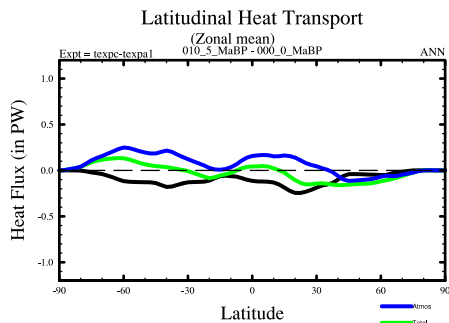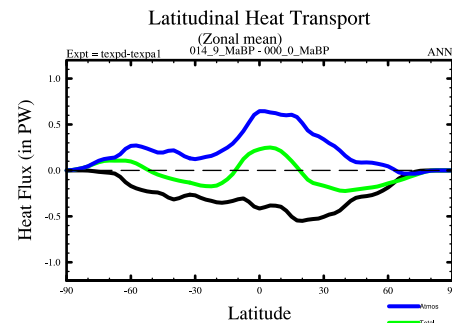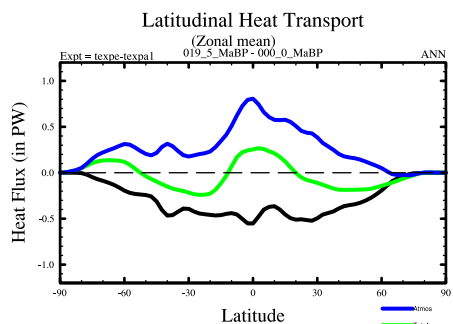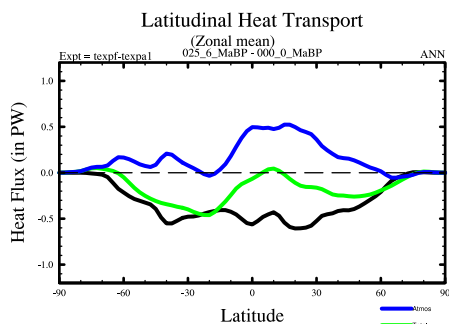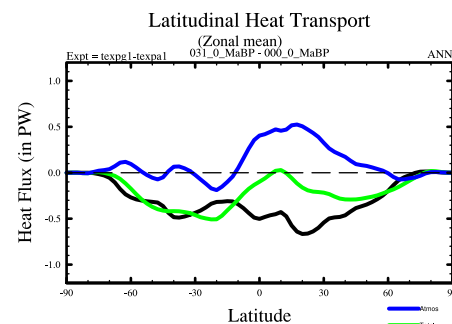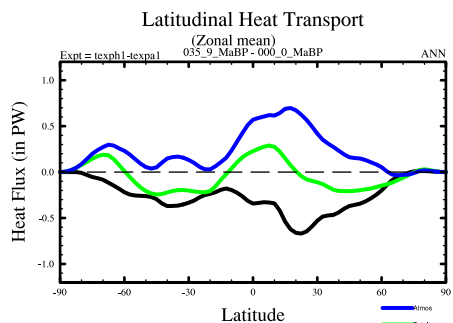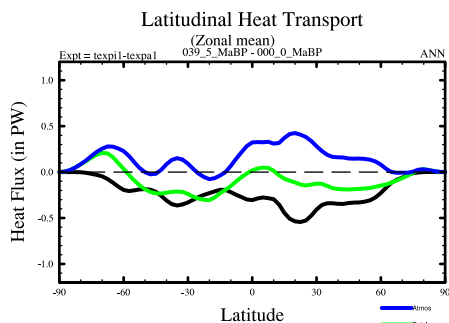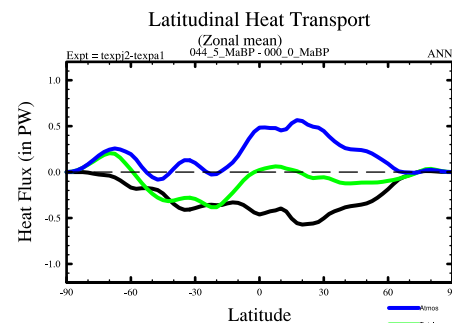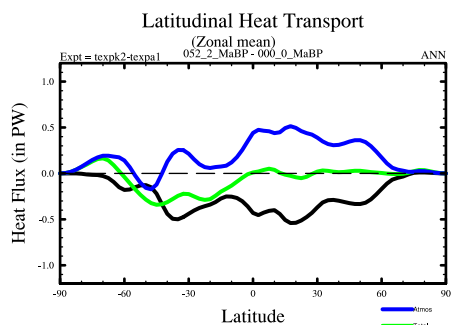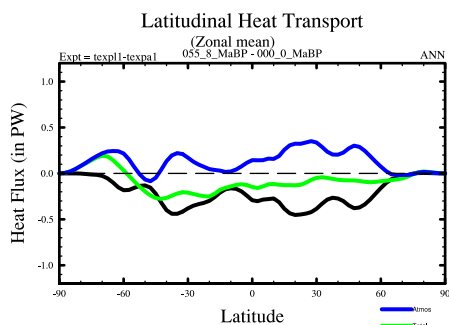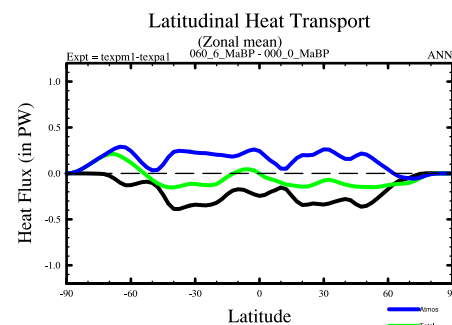



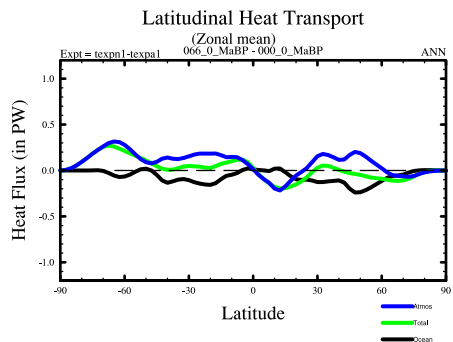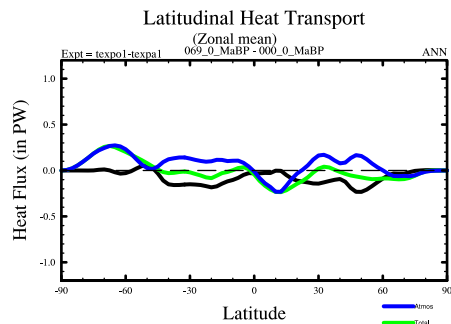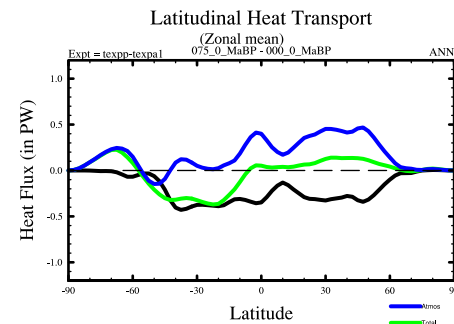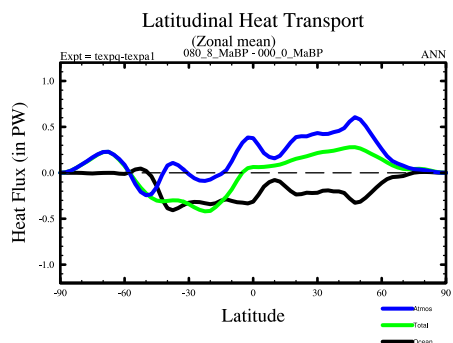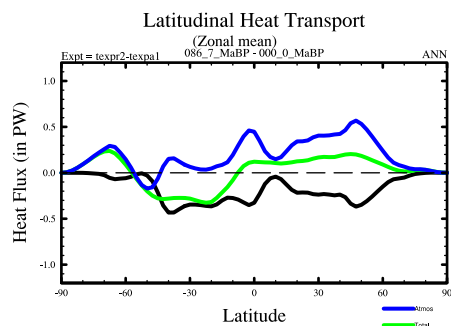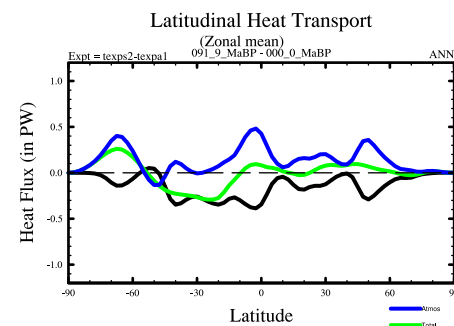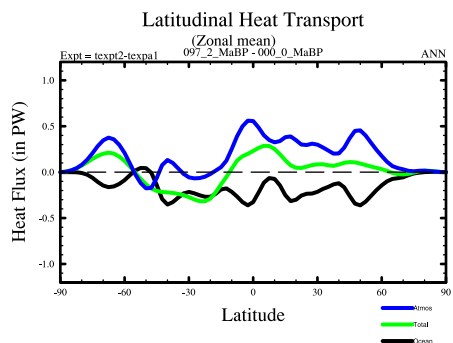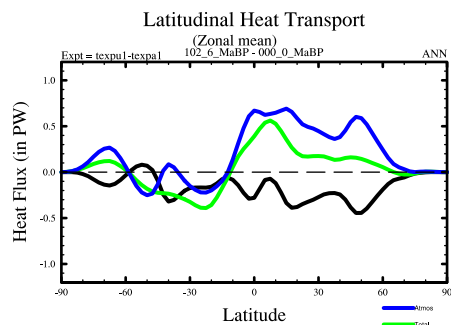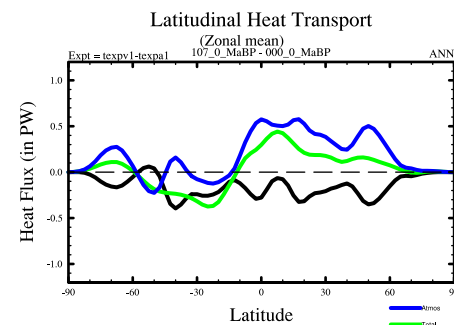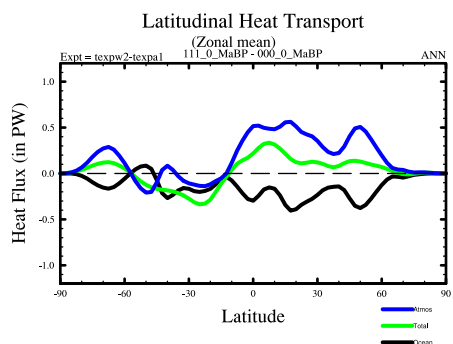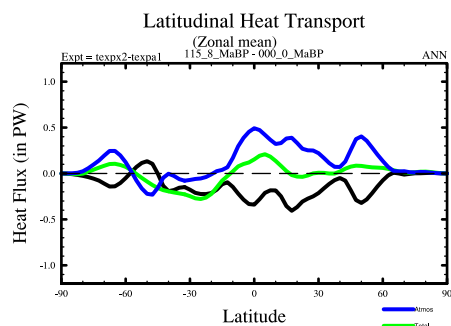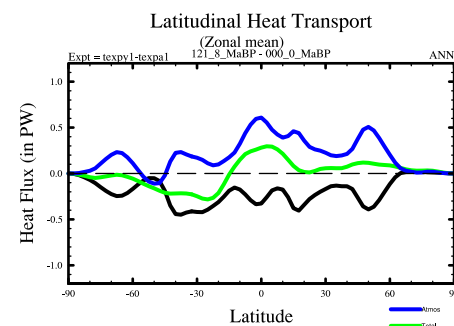

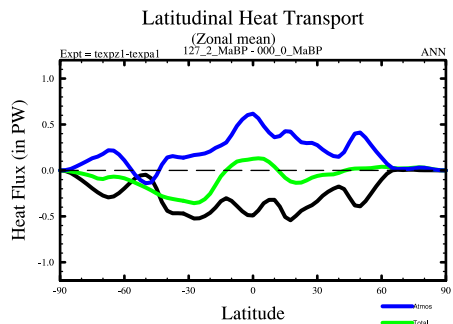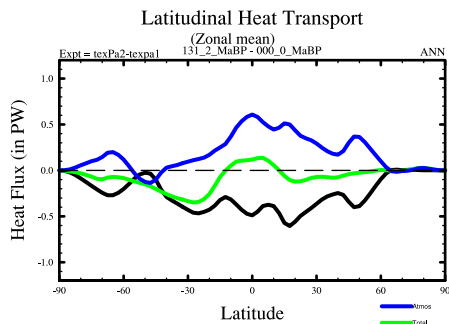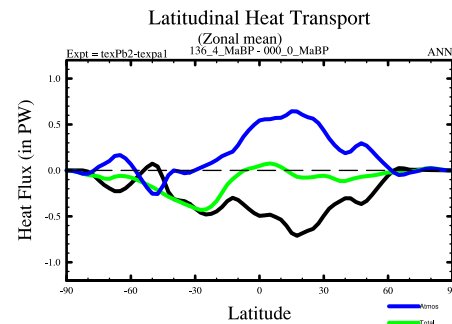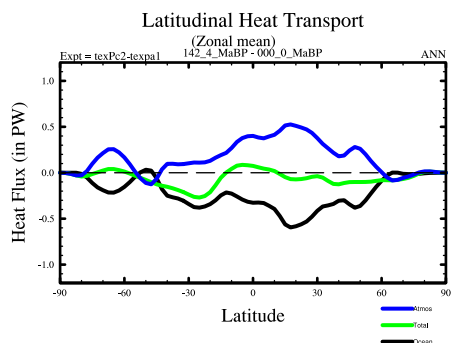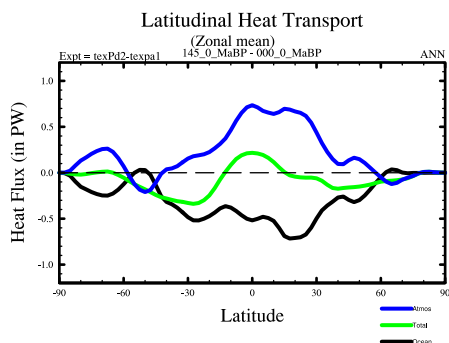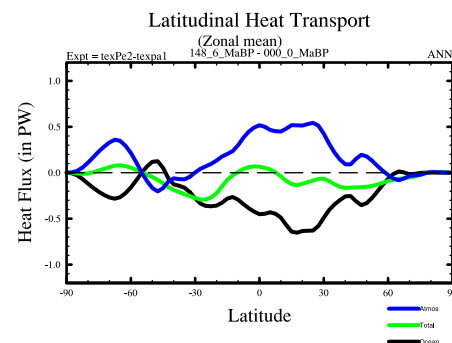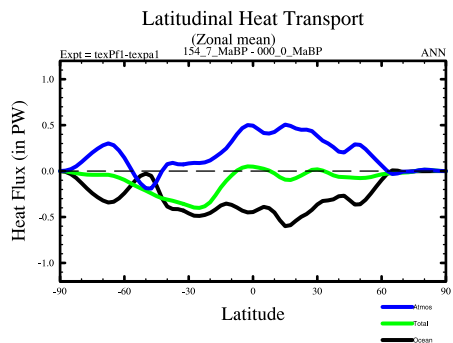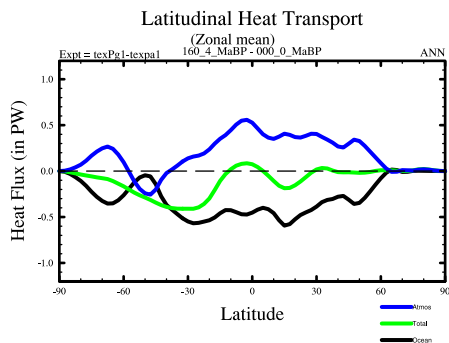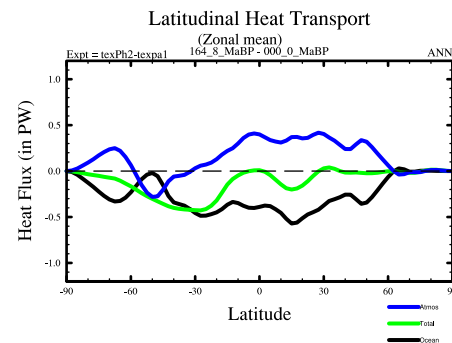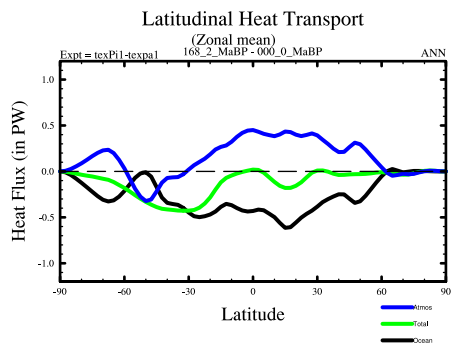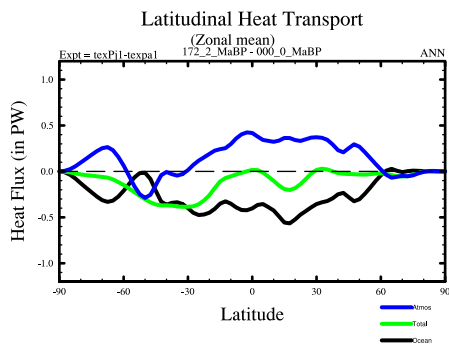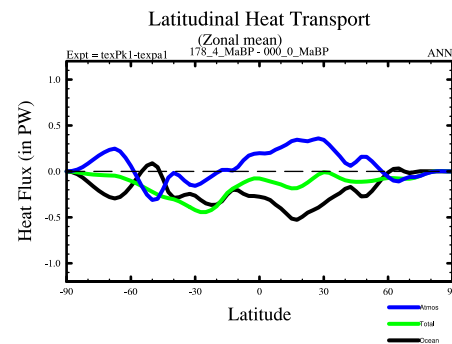

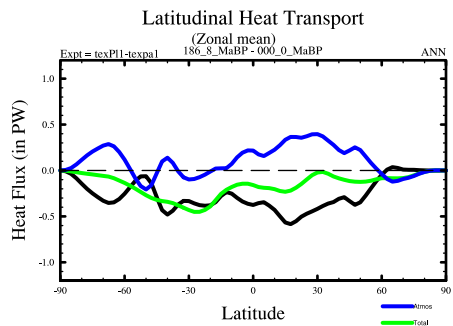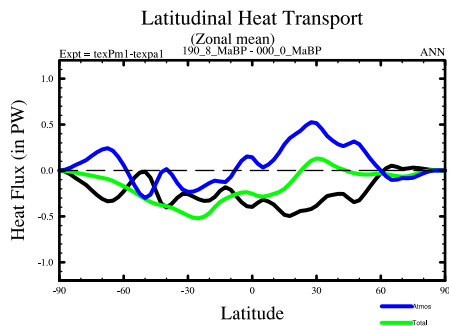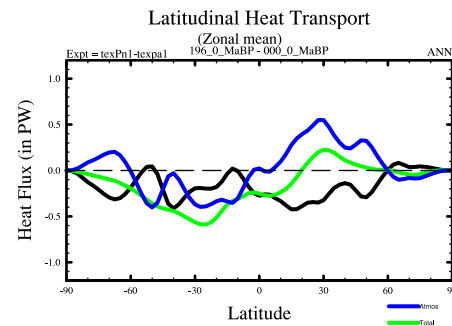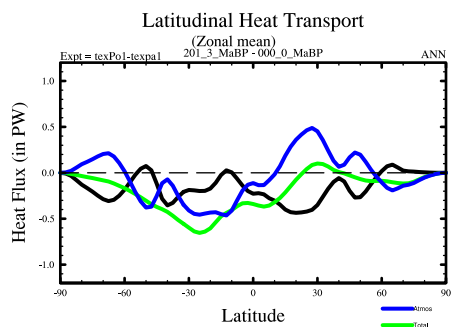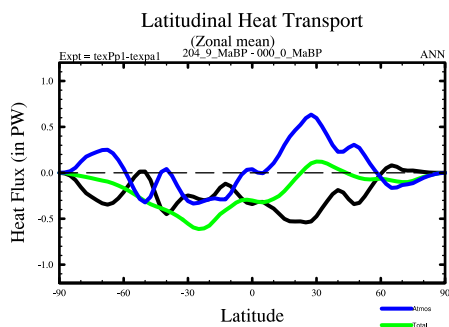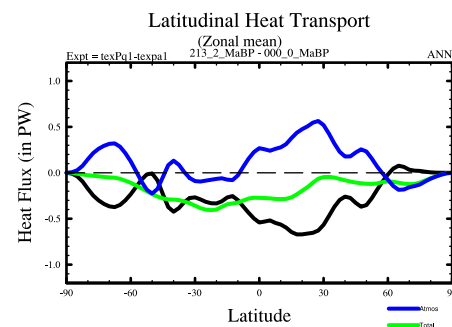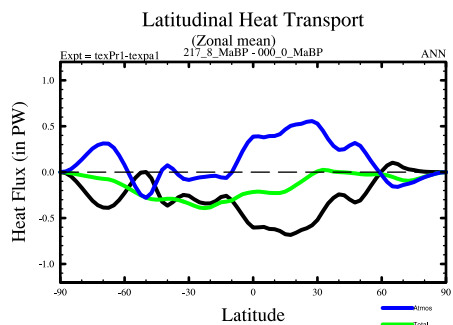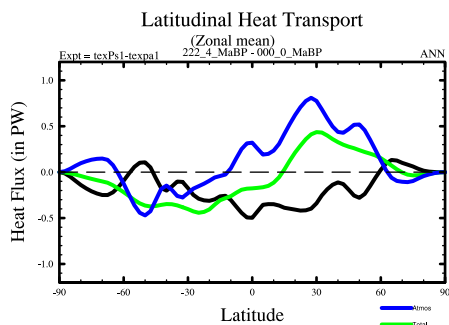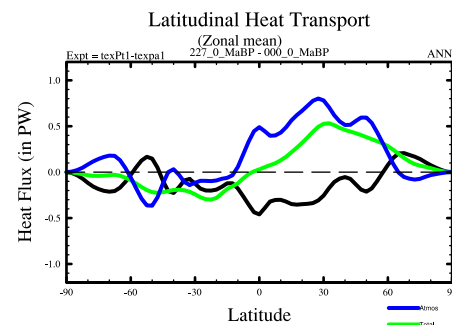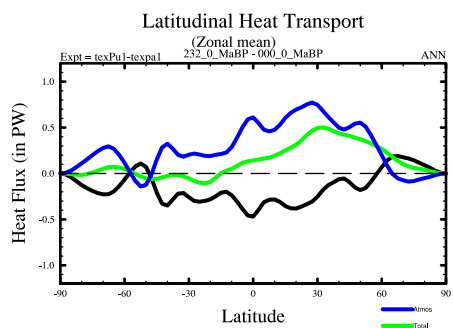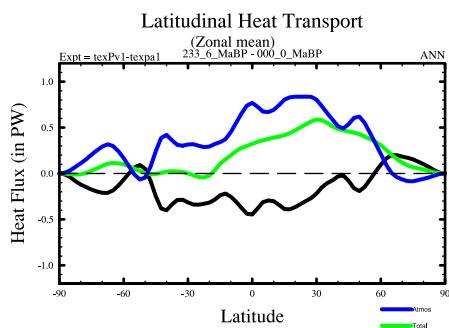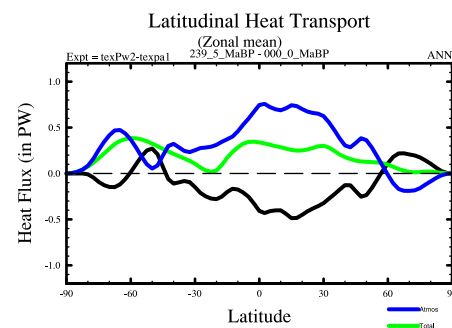



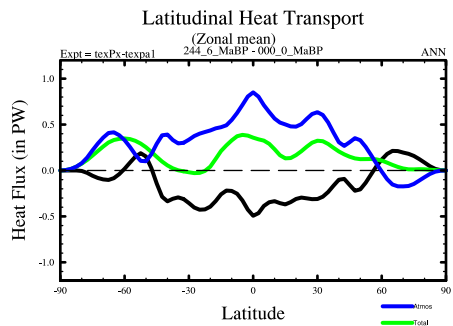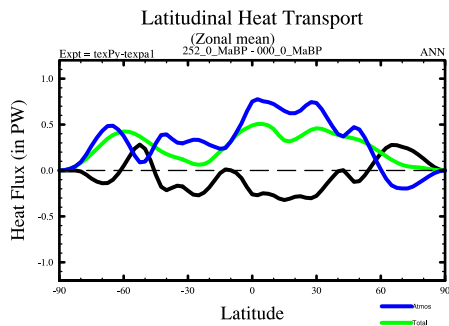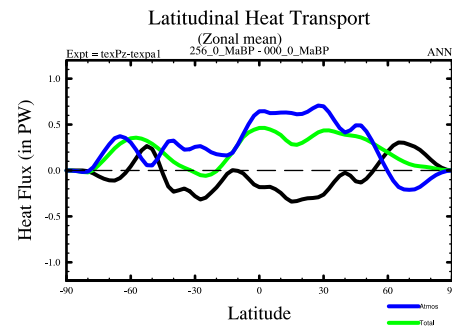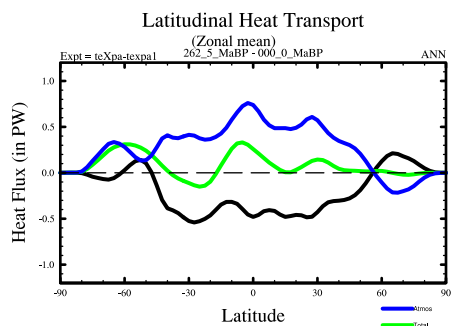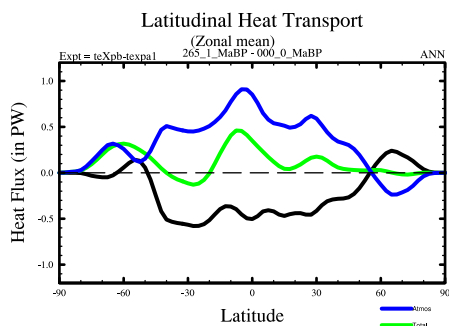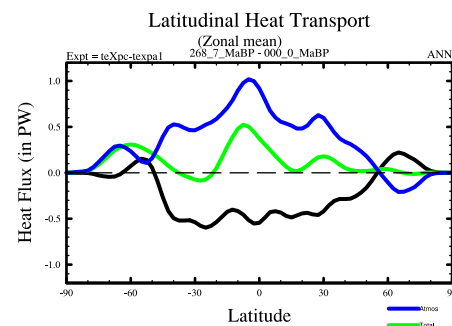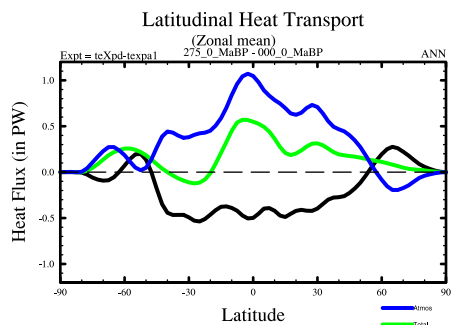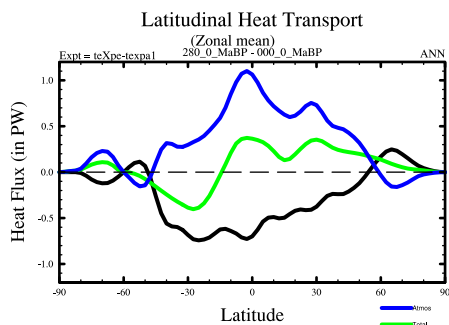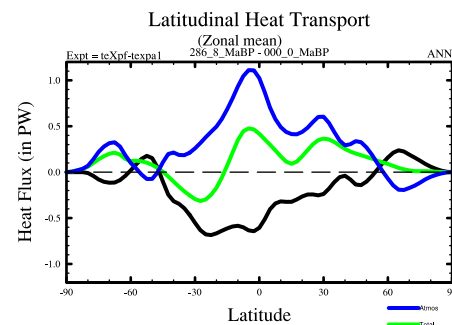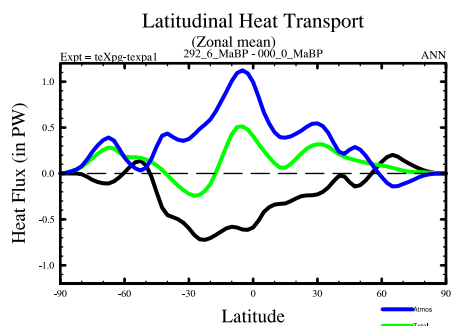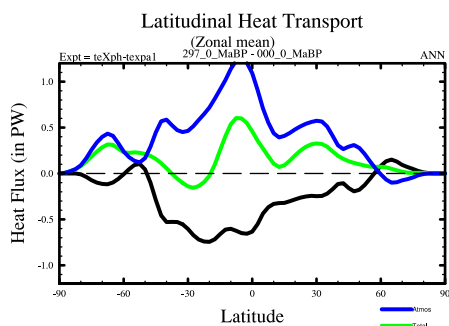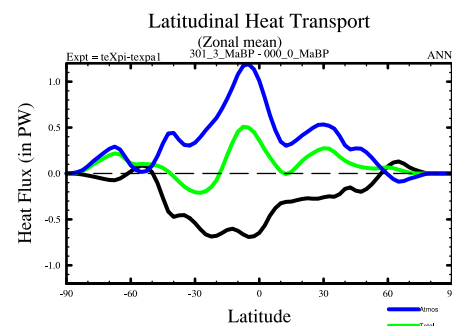

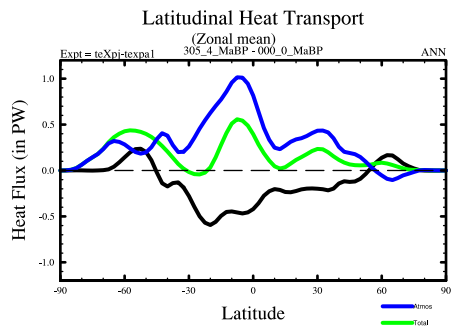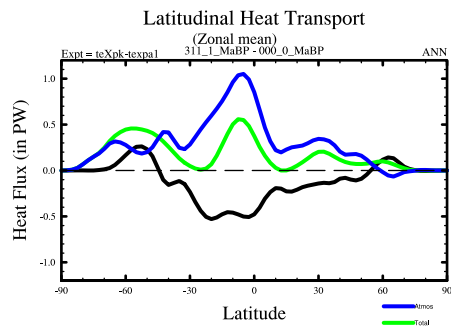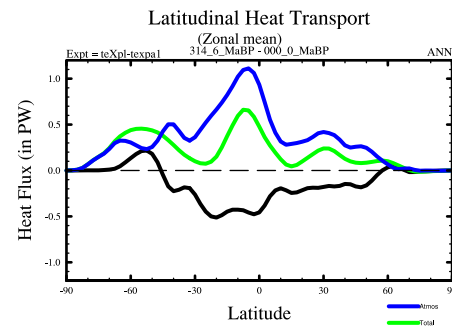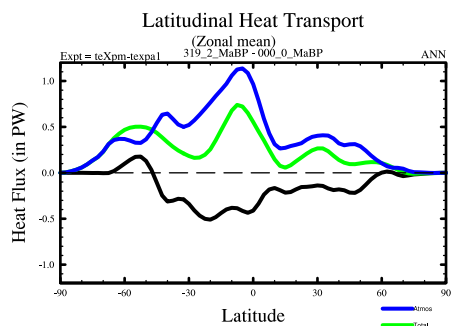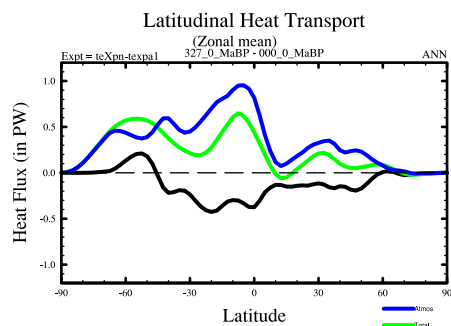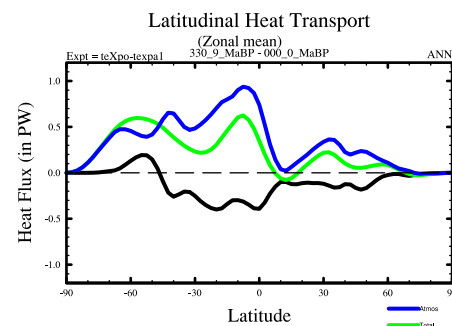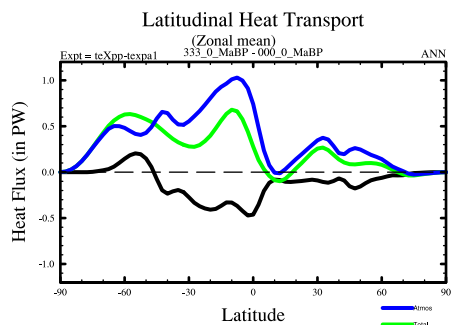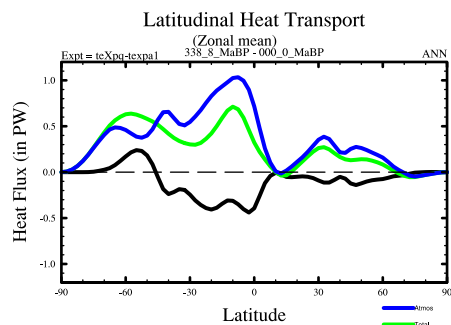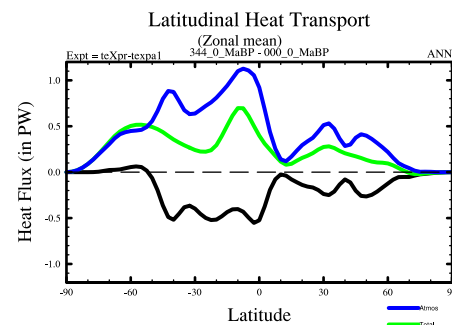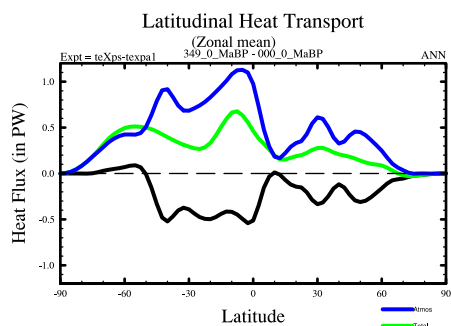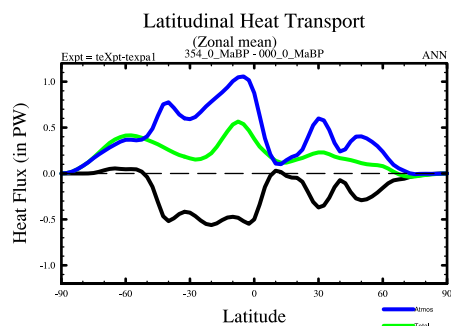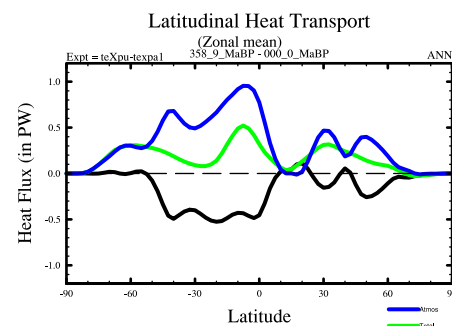

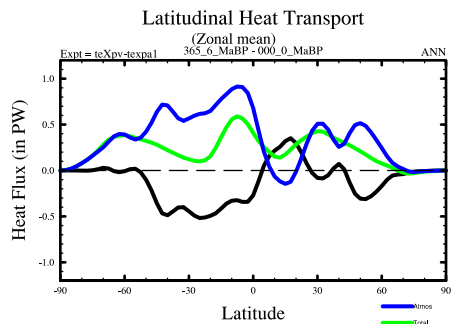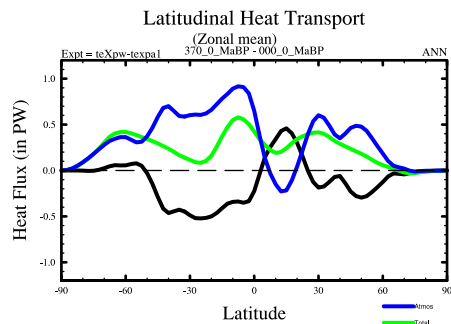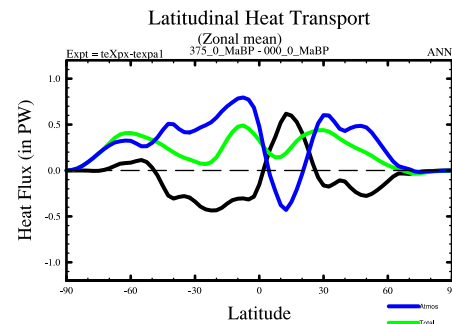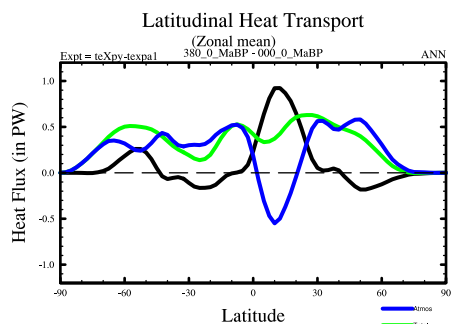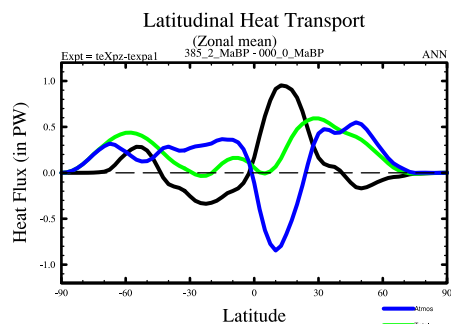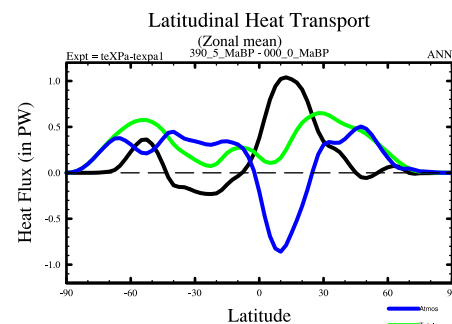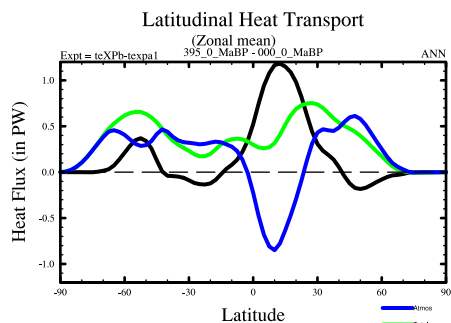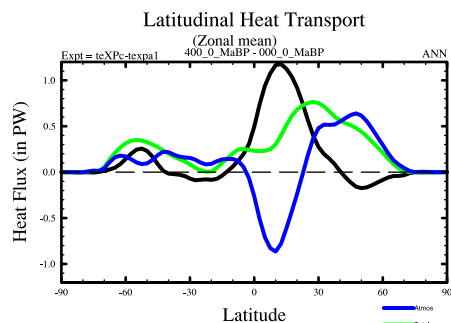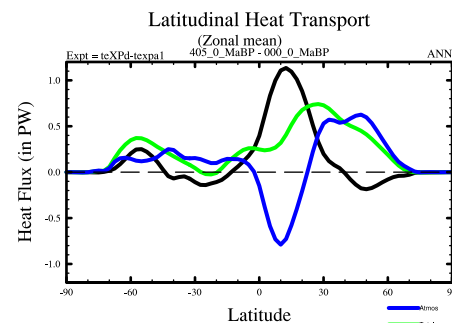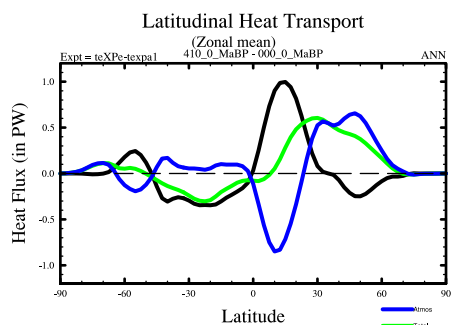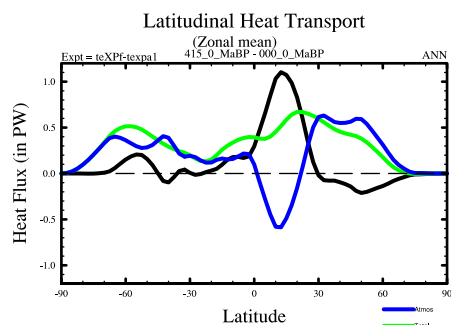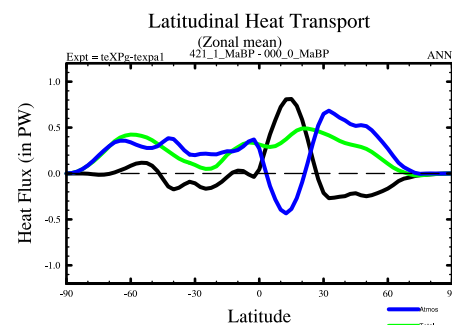



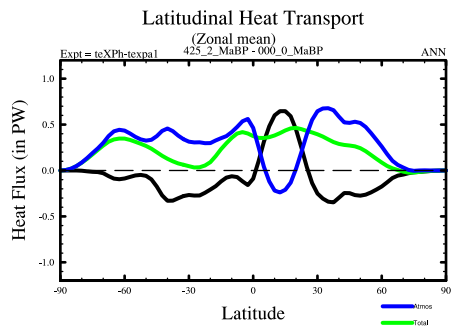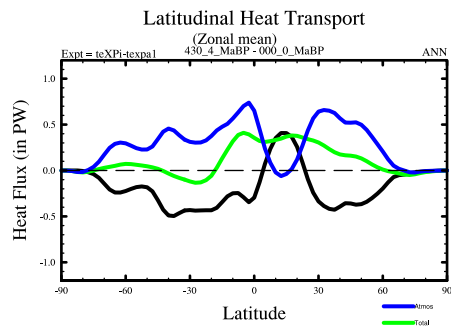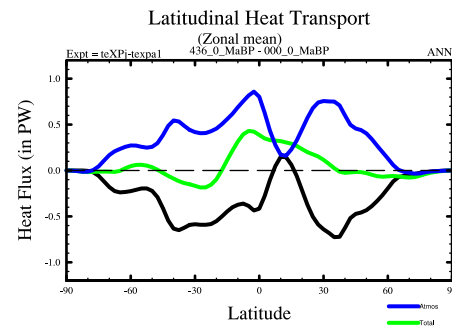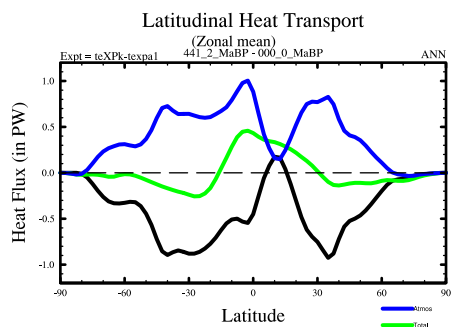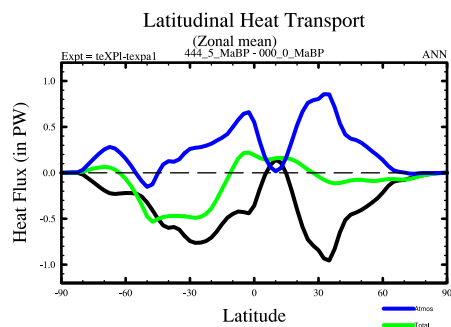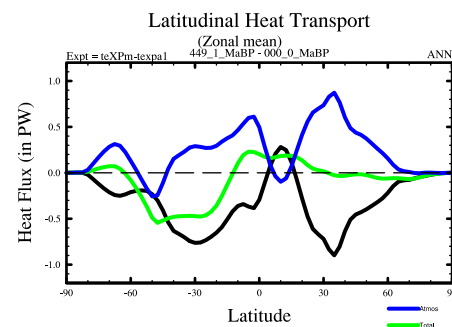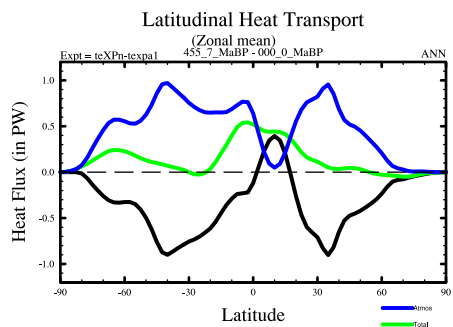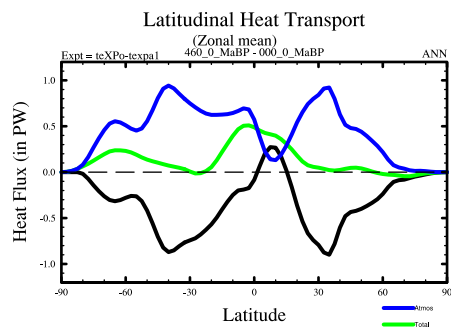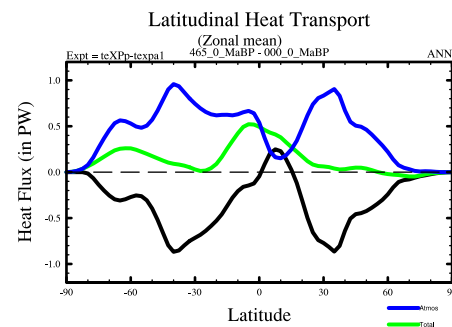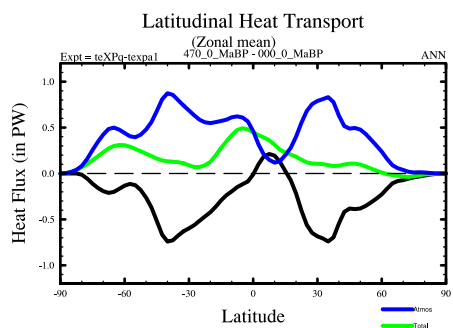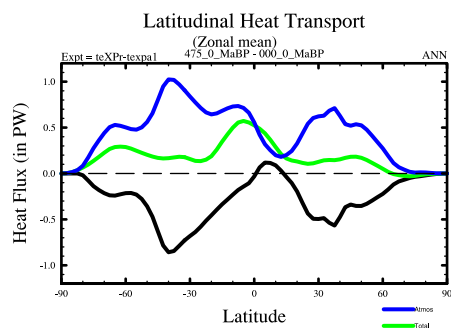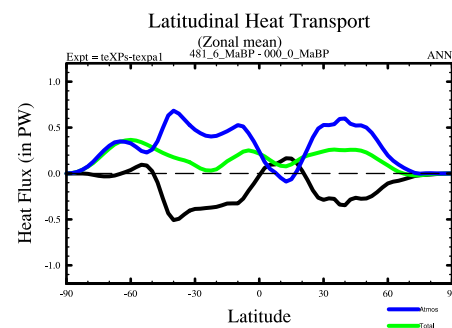

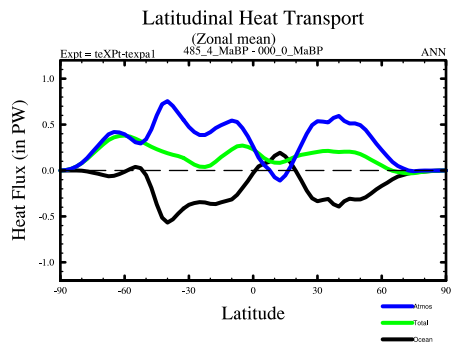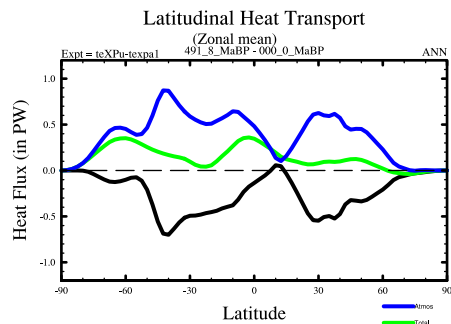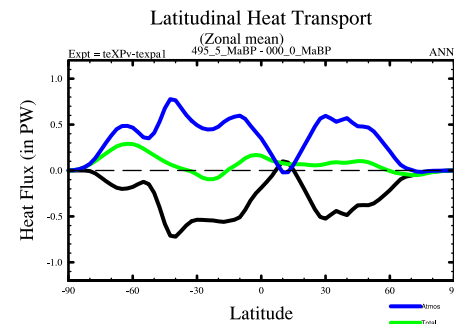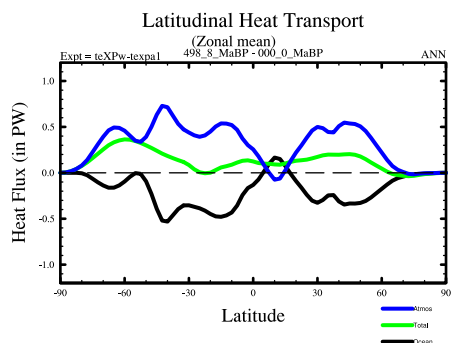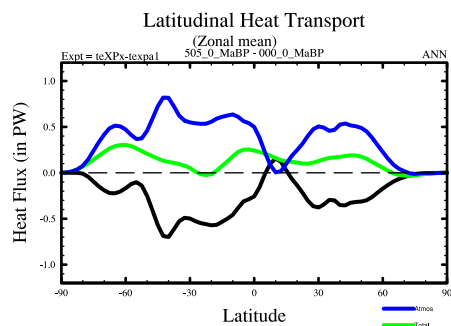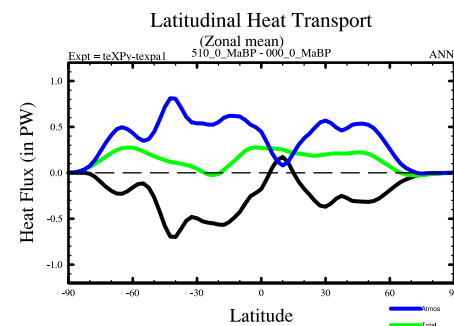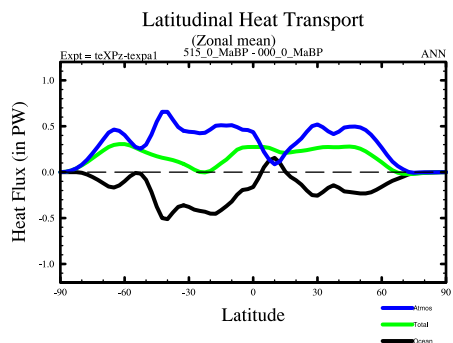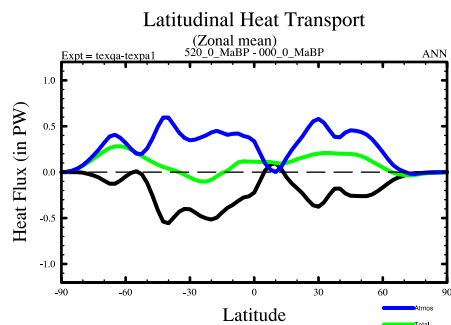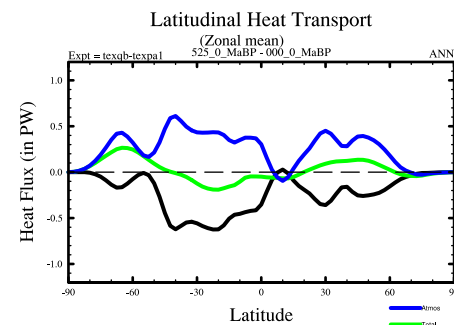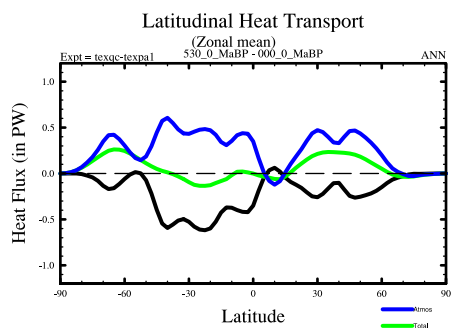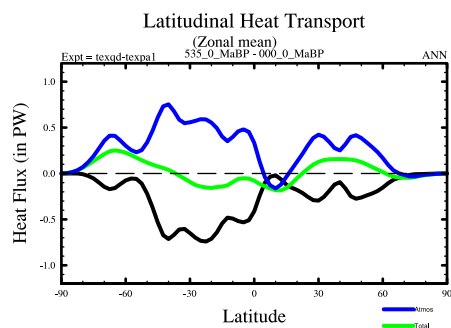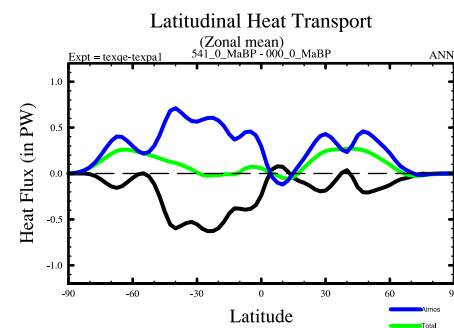

Supplement: Supplementary file 1 [file cp-17-1483-2021-supplement.pdf]
